# Supplementary material for: Aryl urea substituted fatty acids: a new class of protonophoric mitochondrial uncoupler that utilises a synthetic anion transporter
Source: PubMed Central journal article supplement — Chem Sci. 2020 Aug 19;11(47):12677–85. doi: 10.1039/d0sc02777d (PMC8163295; doi:10.1039/d0sc02777d), 2020-08-19
Supplement: SC-011-D0SC02777D-s001.pdf [file SC-011-D0SC02777D-s001.pdf]

## Supporting Information:

### **Aryl urea substituted fatty acids: a new class of protonophoric mitochondrial uncoupler that utilises a synthetic anion transporter**

Tristan Rawling<sup>1\*</sup>, Hugo MacDermott-Opeskin<sup>2</sup>, Ariane Roseblade<sup>1</sup>, Curtis Pazderka<sup>1</sup>,  
Callum Clarke<sup>1</sup>, Kirsi Bourget<sup>3</sup>, Xin Wu,<sup>4</sup> William Lewis,<sup>4</sup> Benjamin Noble<sup>2,5</sup>, Philip A.  
Gale,<sup>4</sup> Megan L. O'Mara<sup>2</sup>, Charles Cranfield<sup>6</sup> and Michael Murray<sup>3</sup>.

<sup>1</sup>School of Mathematical and Physical Sciences, Faculty of Science, University of  
Technology Sydney, Sydney, NSW, 2007, Australia;

<sup>2</sup>Research School of Chemistry, College of Science, The Australian National University,  
Canberra, ACT, 0200, Australia

<sup>3</sup>Discipline of Pharmacology, School of Medical Sciences, University of Sydney, Sydney,  
NSW, 2006, Australia;

<sup>4</sup>School of Chemistry, University of Sydney, Sydney, NSW, 2006, Australia;

<sup>5</sup>School of Engineering, College of Science, Engineering and Health, RMIT University,  
Melbourne, VIC, 3001, Australia

<sup>6</sup>School of Life Sciences, Faculty of Science, University of Technology Sydney, Sydney,  
NSW, 2007, Australia;

## **Table of Contents**

1. Supporting Tables
2. Supporting Figures
3. Experimental procedures – Biology
4. Experimental procedures – Tethered Bilayer Lipid Membranes
5. Experimental procedures – Chemistry
6. Experimental procedures – Crystallography
7. Experimental procedures – Computational Methodology
8. Experimental procedures – NMR studies
9. NMR Spectra
10. References
11. Quantum Chemistry Data

# 1. Supporting Tables

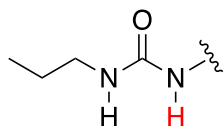

| Compound | R   | pKa (TCC) | pKa (DPU) | $\Delta G_{\text{bindprop}}$<br>(kJ/mol) | $\Delta G_{\text{bindprop}}$<br>(kJ/mol) | $\Delta G_{\text{bindprop}}$<br>(kJ/mol) |
|----------|-----|-----------|-----------|------------------------------------------|------------------------------------------|------------------------------------------|
|          | N/A | water     | water     | gas phase                                | water                                    | n-pentadecane                            |
| 1        |     | 14.00     | 13.47     | -148.55                                  | 5.04                                     | -97.35                                   |
| 2        |     | 13.88     | 13.34     | -151.88                                  | 4.52                                     | -99.30                                   |
| 3        |     | 14.08     | 13.54     | -148.25                                  | 4.77                                     | -97.14                                   |
| 4        |     | 13.37     | 12.84     | -148.75                                  | 4.82                                     | -96.21                                   |
| 5        |     | 12.81     | 12.28     | -151.88                                  | 6.78                                     | -99.45                                   |
| 6        |     | 13.55     | 13.01     | -146.84                                  | 6.32                                     | -95.02                                   |
| 7        |     | 11.60     | 11.06     | -108.21                                  | 6.67                                     | -89.07                                   |
| 8        |     | 12.76     | 12.22     | -152.47                                  | 3.47                                     | -100.66                                  |
| 9        |     | 12.14     | 11.61     | -163.69                                  | 3.63                                     | -106.40                                  |
| 10       |     | 13.33     | 12.79     | -157.78                                  | 4.515                                    | -103.19                                  |

|    |                                                                                   |       |       |         |        |         |
|----|-----------------------------------------------------------------------------------|-------|-------|---------|--------|---------|
| 11 |  | 13.47 | 12.93 | -158.67 | 5.74   | -101.38 |
| 12 |  | 10.24 | 9.7   | -121.15 | 0.92   | -78.77  |
| 13 |  | 11.83 | 11.3  | -176.07 | -1.073 | -116.88 |

**Table S1:** pK<sub>a</sub> values and propanoate binding free energies of model aryl urea compounds shown to two decimal places. pK<sub>a</sub> values are for the urea proton highlighted in red above the main table and were calculated using the G3(MP2)CC(+) composite procedure (see Computational Methodology for details). pK<sub>a</sub> values calculated using trichloroan and diphenylurea as references are denoted pK<sub>a</sub> (TCC) and pK<sub>a</sub> (DPU) respectively. Propanoate binding free energies ( $\Delta G_{\text{bindprop}}$ ) were computed at the M06-2X/6-31+G(d) level of theory (see Computational Methodology for details).

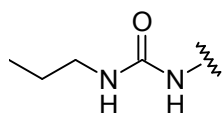

| Compound | R | $\Delta G_{\text{Solv}}^{\text{Monomer}}_{(W-P)}$<br>(kJ/mol) | $\Delta G_{\text{Solv}}^{\text{Complex}}_{(W-P)}$<br>(kJ/mol) |
|----------|---|---------------------------------------------------------------|---------------------------------------------------------------|
| 1        |   | 9.39                                                          | 81.47                                                         |
| 2        |   | 10.37                                                         | 81.02                                                         |
| 3        |   | 14.13                                                         | 73.45                                                         |
| 4        |   | 45.03                                                         | 118.48                                                        |
| 5        |   | 14.22                                                         | 82.45                                                         |
| 6        |   | 7.34                                                          | 80.47                                                         |
| 7        |   | 21.80                                                         | 100.53                                                        |
| 8        |   | 8.53                                                          | 78.88                                                         |
| 9        |   | 25.73                                                         | 90.18                                                         |
| 10       |   | 11.07                                                         | 77.84                                                         |
| 11       |   | 7.51                                                          | 74.86                                                         |
| 12       |   | 4.58                                                          | 99.37                                                         |
| 13       |   | 16.31                                                         | 74.98                                                         |

**Table S2:** Lipophilicity measures for isolated and complex aryl urea model compounds. The quantities  $\Delta G_{\text{Solv}}^{\text{Monomer}}_{(\text{W-P})}$  and  $\Delta G_{\text{Solv}}^{\text{Complex}}_{(\text{W-P})}$  are described in detail Computational Methodology and are shown to two decimal places.

| <b>6-TBAOH</b>   | $D(\text{ArH1}) / (10^{-9} \text{ m}^2/\text{s})$ | $D(\text{ArH2}) / (10^{-9} \text{ m}^2/\text{s})$ | Average $\pm$ SD / ( $10^{-9} \text{ m}^2/\text{s}$ ) |
|------------------|---------------------------------------------------|---------------------------------------------------|-------------------------------------------------------|
| 50 $\mu\text{M}$ | 1.02                                              | 0.988                                             | $1.01 \pm 0.04$                                       |
| 5.0 mM           | 1.12                                              | 1.05                                              | $1.09 \pm 0.05$                                       |

**Table S3** Diffusion coefficients of **6-TBAOH** at two concentrations in  $\text{CDCl}_3$  at 298 K, determined by diffusion NMR based on two aromatic CH peaks of NM3 from 7.5 to 7.9 ppm.

## 2. Supporting Figures

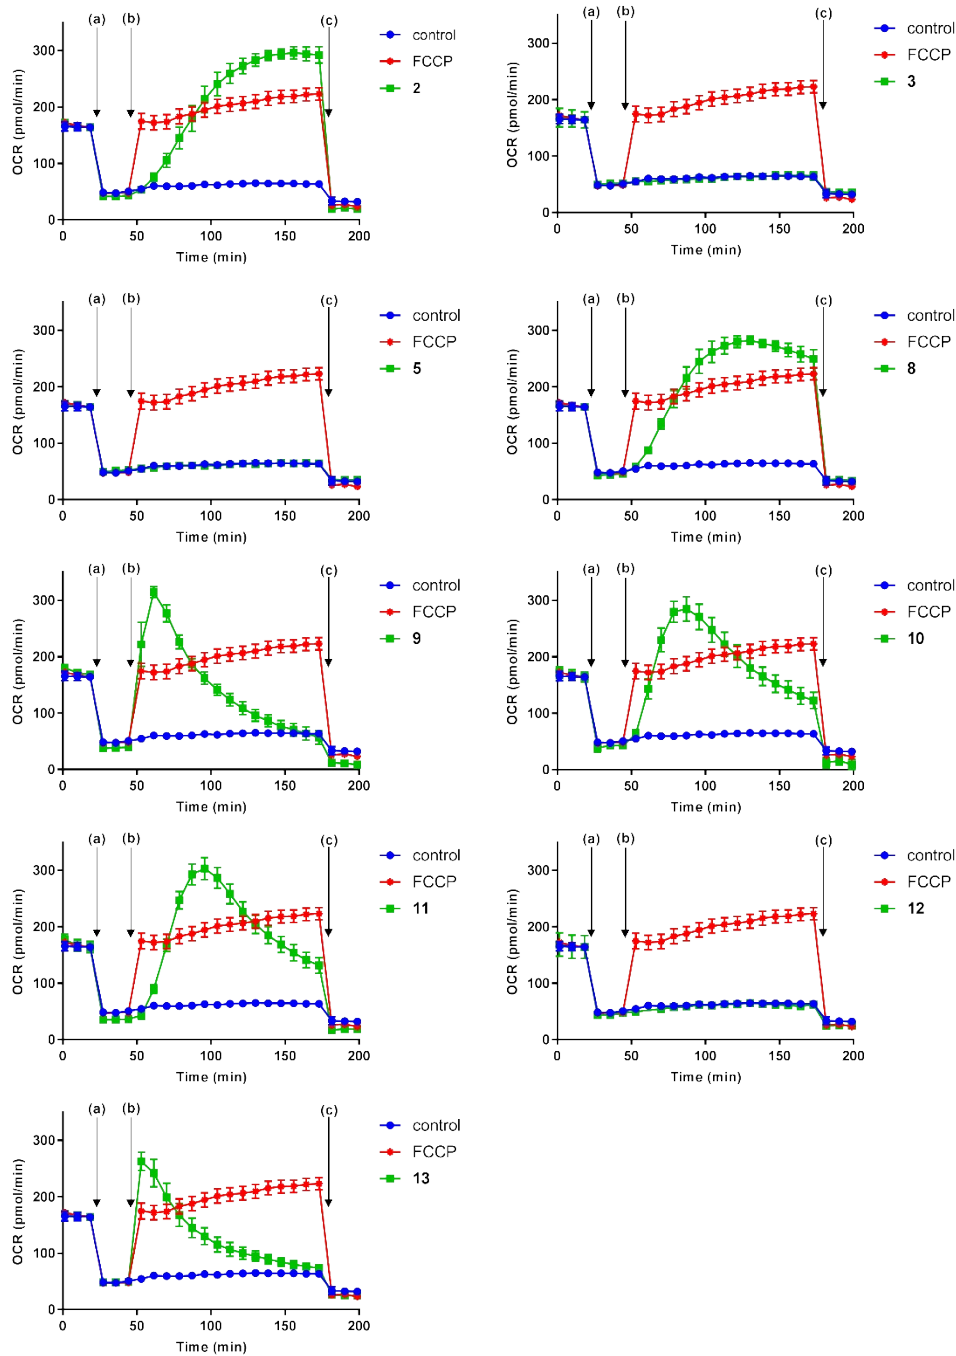

**Figure S1. Uncoupling activity of aryl-urea fatty acids.** Oxygen consumption rates (OCR) in MDA-MB-231 cells after sequential addition of the ATP-synthase inhibitor oligomycin (1  $\mu$ M; arrow a), protonophore FCCP (1  $\mu$ M) or aryl-ureas (20  $\mu$ M; arrow b), and then the ETC complex inhibitors rotenone/antimycin A (1  $\mu$ M). Data represents the mean  $\pm$  SEM of 3 independent experiments.



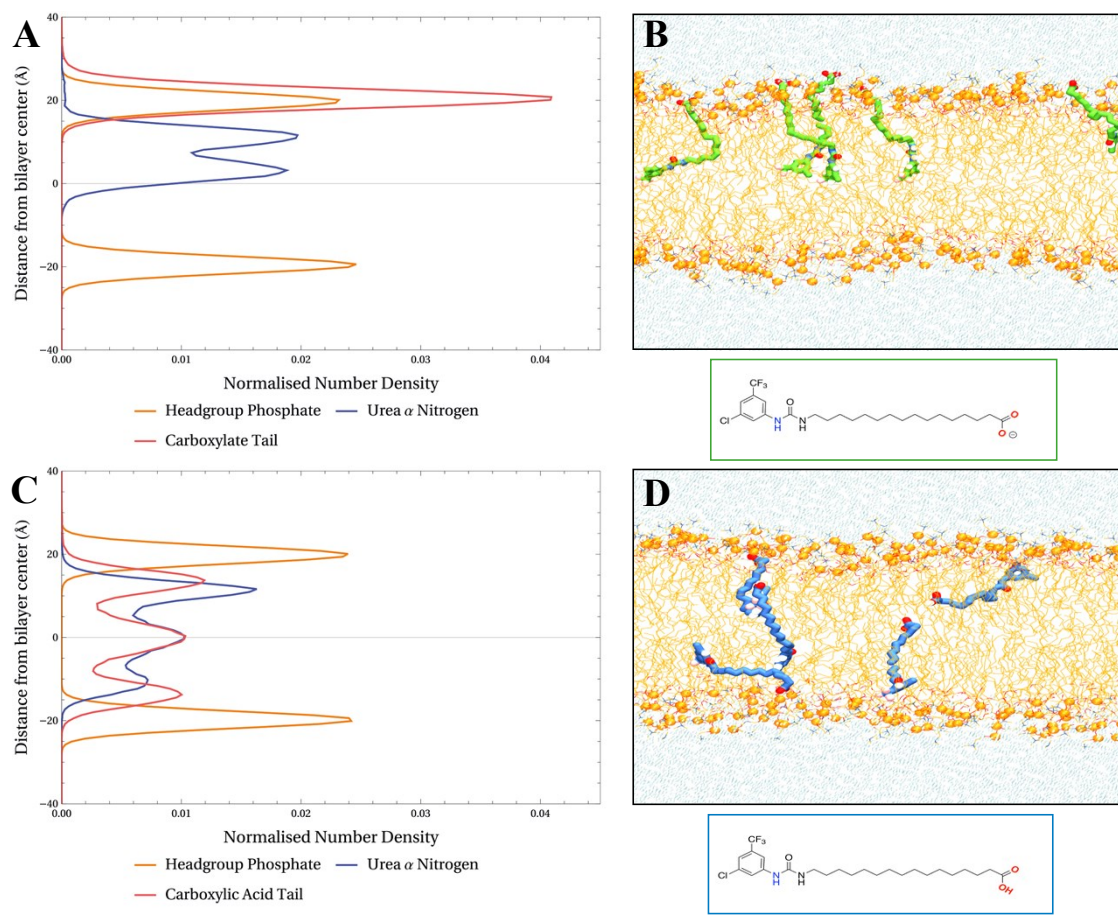

**Figure S2:** Normalised Z axis number densities and representative simulation snapshots for various species in a DOPC bilayer over the simulation timeframe (4 microseconds per system). Normalized Z axis number densities are shown for the **6-D** and **6** containing systems in a) and c) while the corresponding simulation snapshots are shown in b) and d).

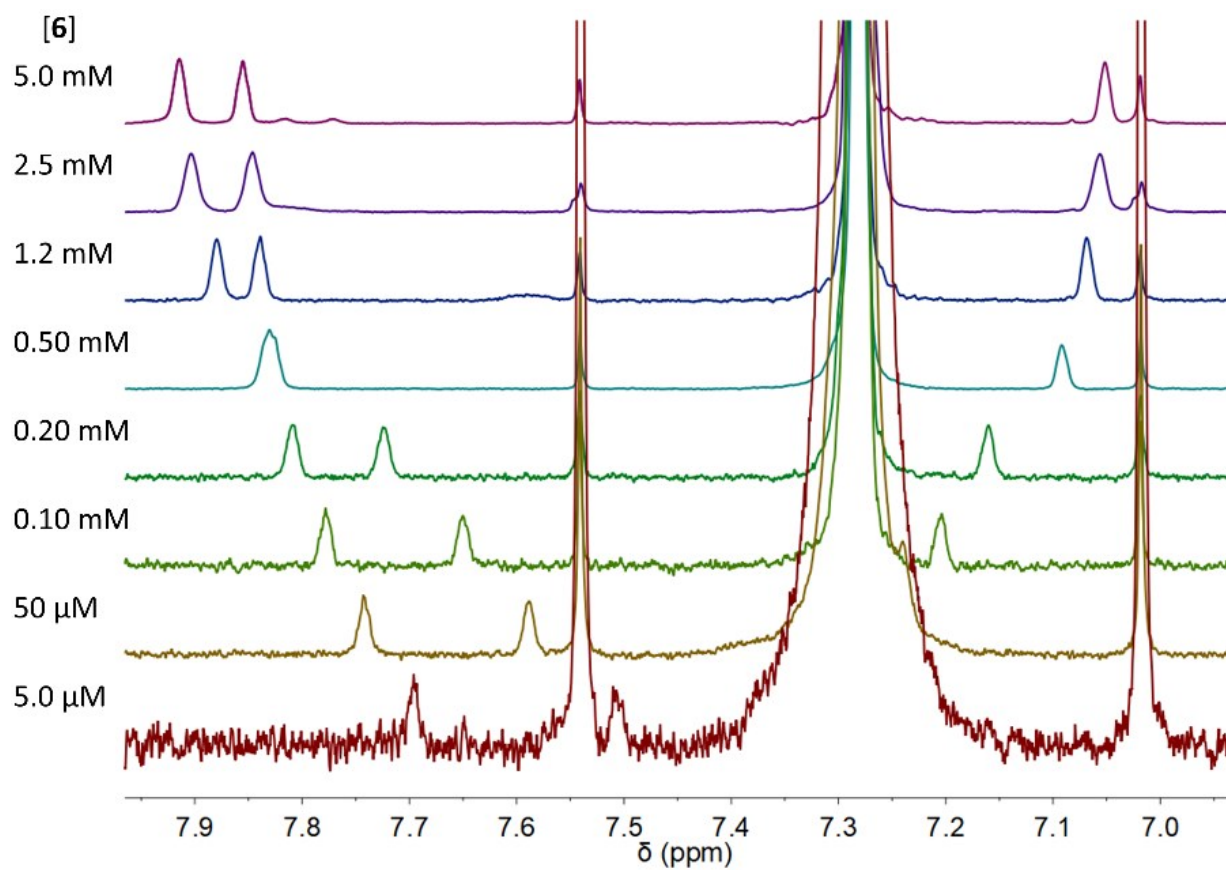

**Figure. S3:** Concentration-dependent <sup>1</sup>H NMR (400 MHz) spectra of **6**-TBAOH in CDCl<sub>3</sub> at 298 K.

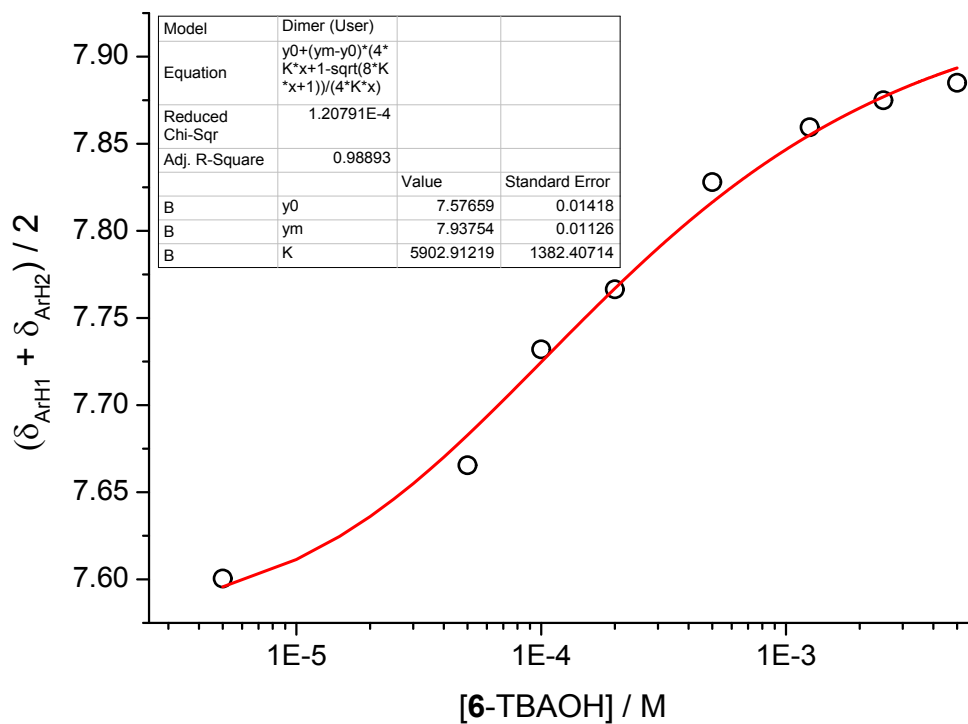

**Figure S4:** Averaged chemical shifts of two aromatic CH peaks from 7.5 to 7.9 ppm at different concentrations of **6**-TBAOH in CDCl<sub>3</sub> at 298 K. The data was fitted to a monomer-dimer equilibrium model, giving a dimerisation constant ( $K_2$ ) of  $5.9 \times 10^3 \text{ M}^{-1}$ .

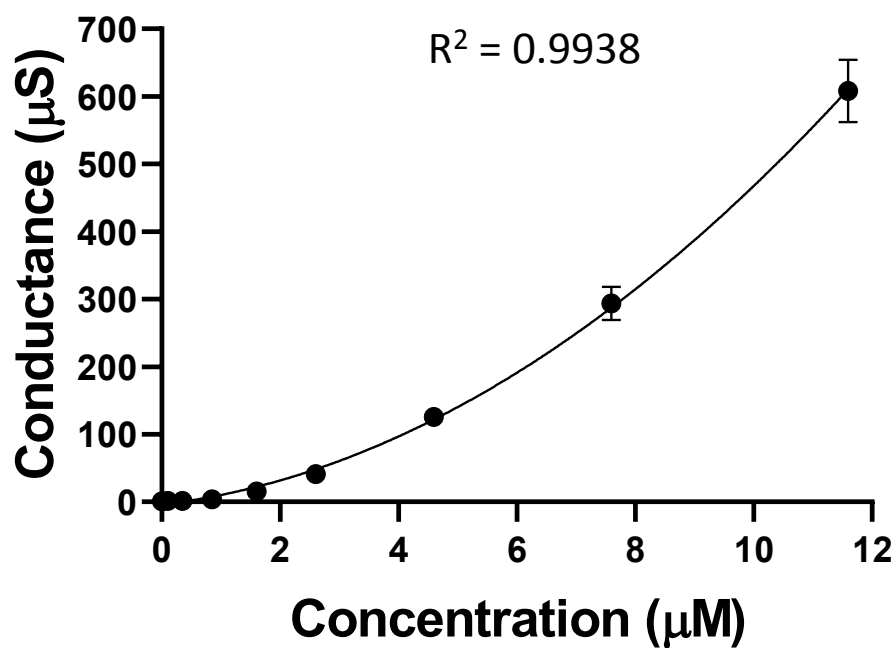

**Figure S5.** Conductance measures of DOPC tethered bilayer lipid membranes in response to increasing concentrations of **6**. The quadratic regression was made with GraphPad Prism 8.2.1. Data represents the mean  $\pm$  SEM of 3 independent experiments.

### 3. Experimental procedures – Biology

#### *Cell culture and cell-based assays.*

Human tumour cell lines were obtained from ATCC (Manassas, VA) and were grown at 37°C in a humidified atmosphere of 5% CO<sub>2</sub> in air in DMEM supplemented with 10% fetal bovine serum (Thermo Fisher Scientific) and 1% penicillin/streptomycin (Invitrogen). Confluent cells (80-90%) were harvested using Trypsin/EDTA after washing in PBS. Cells were treated with various concentrations of the test compounds in DMSO (final concentration 0.1%); control cells were treated with DMSO alone.

**ATP assay:** MDA-MB-231 cells were seeded in triplicate in 96-well plates ( $7.5 \times 10^4$  cells/well) and allowed to adhere overnight. After serum starvation for 24 h cells were treated with various concentrations of the test compounds for 24 h; control cells received serum-free DMEM. Cells were incubated with CellTiter-Glo in serum-free medium (RT, 10 min) and luminescence was determined (CellTiter-Glo® luminescent cell viability assay, Promega; Annandale, NSW, Australia).

**JC-1 assay:** MDA-MB-231 cells were seeded in triplicate in 96-well plates ( $1 \times 10^4$  cells/well) and allowed to adhere overnight. After serum starvation for 24 h cells were treated with various concentrations of the test compounds for 1 h; control cells received serum-free DMEM. Cells were incubated with JC-1 in serum-free medium (37°C, 20 min) and the JC-1 red:green ratio was estimated (JC-1 Mitochondrial Membrane Potential Assay Kit; Cayman Chemical, Ann Arbor, MI).

**Mitochondrial function:** Mitochondrial function was measured by determining the oxygen consumption rate (OCR) of cells with a Seahorse XF24 extracellular flux analyser (Seahorse Bioscience, MA, USA) according to the manufacturer's protocol. MDA-MB-231 cells were seeded in 24-well XF cell culture microplates ( $2.5 \times 10^4$  cells per well) and allowed to adhere

overnight (37 °C, 5% CO<sub>2</sub>). After serum starvation for 24 h, culture media was replaced with buffered XF Base Medium supplemented with 2 mM L-glutamine, 10 mM glucose and 2 mM sodium pyruvate at pH=7.4. The cells were incubated at 37 °C without CO<sub>2</sub> for an hour, and then, the OCR was measured utilizing an XF Cell Mito Stress Test Kit (Seahorse Bioscience, MA, USA). Oligomycin (final concentration 1 μM), carbonylcyanide m-chlorophenylhydrazone (FCCP-final concentration 0.5 μM, or test compounds - final concentrations 20 μM), and rotenone/antimycin A (final concentration 0.5 μM) were added to the sensor cartridge, and the OCR was measured using a modified cycling program.

## 4. Experimental procedures – Tethered bilayer lipid membranes

### *Tethered bilayer lipid membranes*

Lipid bilayers were anchored to across a gold electrode according to “T10” architecture.<sup>1-2</sup> This consists of 10% benzyl-disulfide (tetra-ethyleneglycol) n=2 C20-phytanyl “tethering” molecules interspersed with 90% benzyl-disulfide-tetra-ethyleneglycol-OH “spacer” molecules. Spacer and tether molecules are all coordinated onto a 2.1 mm<sup>2</sup> gold tethering electrode. To these first layer chemistries were added a second layer of mobile phase lipid molecules of 3 mM 1,2-dioleoyl-sn-glycero-3-phosphocholine (DOPC) (Avanti Polar Lipids Inc., Alabaster, USA) which was left to incubate with the tethering molecules for exactly 2 min before a rapid exchange of 3 x 400  $\mu$ L 100 mM NaCl tris buffer induced the formation of a completed tBLM.

### *Electrical impedance spectroscopy*

Swept frequency electrical impedance spectroscopy ranging from 0.1 Hz to 2000 Hz was applied at 25 mV peak-to-peak, using a Tethapod™ electrical impedance spectrometer (SDx Tethered Membranes Pty Ltd). Impedance and phase profiles were fitted to an equivalent circuit consisting of a constant phase element, representing the tethering gold electrode and reservoir region, in series with a resistor, to represent the impedance of the surrounding electrolyte solution, and a resistor/capacitor representing the lipid bilayer (as described previously<sup>3</sup>). Data fitting utilized a proprietary adaptation of a Levenberg–Marquardt fitting routine incorporated into the TethaQuick™ software (SDx Tethered Membranes Pty Ltd).

## 5. Experimental procedures – Chemistry

### *General Chemistry*

Compounds **1**, **8**, **11**, **12** and **14** were prepared by previously reported procedures.<sup>4-5</sup> Reagents and anhydrous solvents were purchased from Sigma Aldrich (Castle Hill, NSW, Australia), Fluorochem (Derbyshire, United Kingdom) and Astatech (Bristol, USA), and used without further purification. Reactions were monitored by thin-layer chromatography (TLC) using silica gel 60 F<sub>254</sub> plates. TLC plates were visualised with UV light and potassium permanganate TLC stain. Reaction products were purified by dry column vacuum chromatography on silica gel using gradient elutions. <sup>1</sup>H and <sup>13</sup>C NMR spectra were recorded on an Agilent 500 MHz NMR. Spectra were referenced internally to residual solvent (CDCl<sub>3</sub>; <sup>1</sup>H δ 7.26, <sup>13</sup>C δ 77.10. DMSO-*d*<sub>6</sub>; <sup>1</sup>H δ 2.49, <sup>13</sup>C δ 39.52). High resolution mass spectra (HRMS) were recorded on an Agilent Technologies 6510 Q-TOF LCMS. The purity of all test compounds was confirmed to be >95% by absolute quantitative NMR.



*Synthesis of aryl ureas 2- 13*

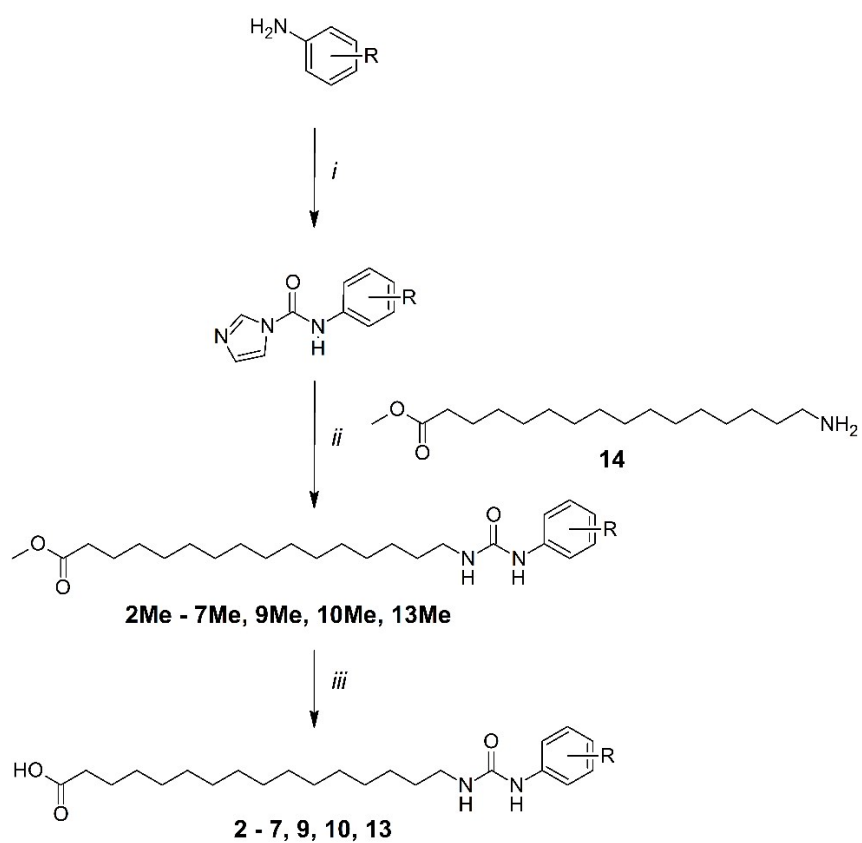

**Scheme S1.** Synthesis of aryl-urea substituted fatty acids **2-13**. Reagents and conditions (i) dichloromethane, rt, 2 h; (ii) dichloromethane, rt, 1 h; (iii) 1.5M NaOH, ethanol, rt, 3 h.

### General Procedure A: Urea formation

*N,N*-carbonyldiimidazole (1.0 mmol) was added to a solution of an appropriately substituted aniline (1.0 mmol) in anhydrous dichloromethane (20 mL) under N<sub>2</sub>. The solution was stirred at room temperature for 2 hours and the solvent was removed *in vacuo* to provide a crude *N*-carbamoyl imidazole as a solid. The crude *N*-carbamoyl imidazole was then added to a solution of amine **14** (0.150g, 0.53 mmol) in dichloromethane (15 mL) and the reaction was stirred at room temperature for 1 hour. Ethyl acetate (50mL) was added and the solution washed with water (3 x 50 mL). The organic layer was dried over sodium sulphate and evaporated *in vacuo*. The crude product was purified by DCVC using gradient elutions of dichloromethane/ethyl acetate (100:0 to 85:15) or dichloromethane/methanol (100:0 to 85:10).

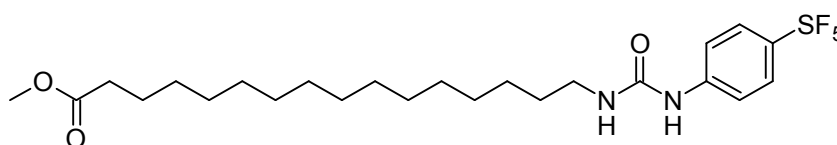

### Methyl 16-({[4-(pentafluoro- $\lambda^6$ -sulfanyl)phenyl]carbamoyl}amino)hexadecanoate (2-Me).

Product isolated as an impure solid that was used directly in General Procedure B. <sup>1</sup>H NMR (500 MHz, CDCl<sub>3</sub>)  $\delta$  7.68 (AA'BB', 2H), 7.46 (AA'BB', 2H), 6.25 (s, 1H), 4.72 (br, 1H), 3.70 (s, 3H), 3.30 (q, J = 6.5 Hz, 2H), 2.34 (t, J = 7.5 Hz, 2H), 1.6 (p, J = 7.0 Hz, 2H), 1.54 (p, J = 7.0 Hz, 2H), 1.33-1.20 (m, 22H). HRMS (ESI) *m/z* [M+H]<sup>+</sup> calcd for C<sub>24</sub>H<sub>40</sub>O<sub>3</sub>N<sub>2</sub>F<sub>5</sub>S 531.2674; found 531.2682.

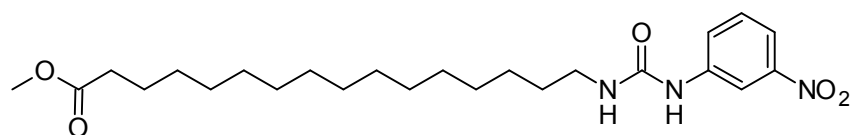

**Methyl 16-[(3-nitrophenyl)carbamoylamino]hexadecanoate (3-Me).**

White solid, yield = 45 %. Mp = 110-112 °C. <sup>1</sup>H NMR (500 MHz, DMSO-*d*<sub>6</sub>) δ 8.92 (s, 1H), 8.50 (dd, J = 2.0 Hz, 1H), 7.73 (dd, J = 8.0, 1.5 Hz, 1H), 7.61 (d, J = 8.0 Hz, 1H), 7.43 (d, J = 8.0 Hz, 1H), 6.31 (t, J = 6.0 Hz, 1H), 3.54 (s, 3H), 3.09 (q, J = 6.5 Hz, 2H), 2.26 (t, J = 7.0 Hz, 2H), 1.48 (p, J = 7.0 Hz, 2H), 1.42 (p, J = 7.0 Hz, 2H), 1.30 – 1.18 (m, 22H). <sup>13</sup>C NMR (125MHz, DMSO-*d*<sub>6</sub>) δ 176.47, 158.00, 151.22, 145.06, 132.97, 126.69, 118.44, 114.54, 54.29, 36.37, 32.71, 32.13 (4C), 32.10, 32.08, 31.97, 31.85, 31.77, 31.55, 29.44, 27.54. HRMS (ESI) *m/z* [M+H]<sup>+</sup> calcd for C<sub>24</sub>H<sub>40</sub>O<sub>5</sub>N<sub>3</sub> 450.2962; found 450.2985.

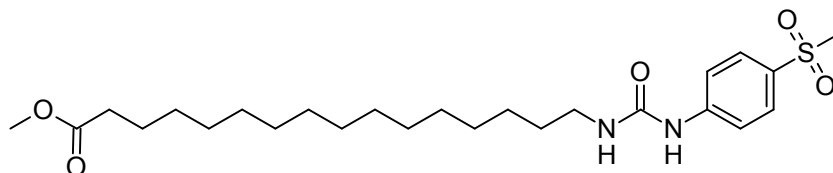

**Methyl 16-([4-(methanesulfonyl)phenyl]carbamoyl)amino)hexadecanoate (4-Me).**

White solid, yield = 86%. Mp = 124-125 °C. <sup>1</sup>H NMR (500 MHz, CDCl<sub>3</sub>) δ 7.80 (AA'BB', 2H), 7.54 (AA'BB', 2H), 7.07 (br s, 1H), 5.06 (br s, 1H), 3.68 (s, 3H), 3.27 (q, J = 6.5 Hz, 2H), 3.03 (s, 3H), 2.32 (t, J = 7.5 Hz, 2H), 1.70-1.60 (m, 2H), 1.54 (p, J = 7.0 Hz, 2H), 1.40-1.20 (m, 22H). <sup>13</sup>C NMR (125 MHz, CDCl<sub>3</sub>) δ 174.84, 154.66, 144.89, 133.20, 128.85 (2C), 118.49 (2C), 51.70, 44.94, 40.61, 34.33, 30.14, 29.63, 29.60 (2C), 29.48 (3C), 29.42, 29.34 (2C), 29.28, 27.02, 25.22. HRMS (ESI) *m/z* [M+H]<sup>+</sup> calcd for C<sub>25</sub>H<sub>42</sub>N<sub>2</sub>O<sub>5</sub>S 483.2887; found 483.2899.

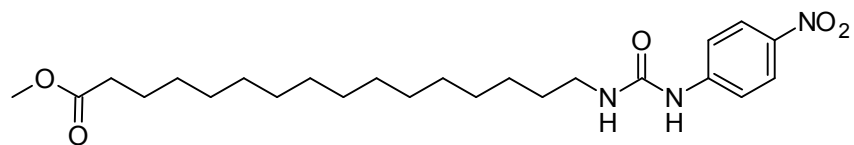

**Methyl 16-[(4-nitrophenyl)carbamoylamino]hexadecanoate (5-Me).**

White solid, yield = 45%. Mp = 128-130 °C. <sup>1</sup>H NMR (500 MHz, DMSO-d<sub>6</sub>) δ 10.38 (br, 1H), 8.10 (AA'BB', 2H), 7.62 (AA'BB', 2H), 7.11 (br, 1H), 3.60 (s, 3H), 3.08 (q, J = 6.5 Hz, 2H), 2.26 (t, J = 7.0 Hz, 2H), 1.55 – 1.40 (m, 4H), 1.30 – 1.20 (m, 22H). <sup>13</sup>C NMR (125 MHz, DMSO-d<sub>6</sub>) δ 175.59, 154.90, 147.79, 139.62, 125.29 (2C), 116.44 (2C), 51.59, 33.38, 29.67, 29.16, 29.11 (2C), 29.08 (2C), 28.85, 28.77, 28.66, 28.55, 26.44, 24.54. HRMS (ESI) *m/z* [M+H]<sup>+</sup> calcd for C<sub>24</sub>H<sub>40</sub>O<sub>5</sub>N<sub>3</sub> 450.2962; found 450.2970.

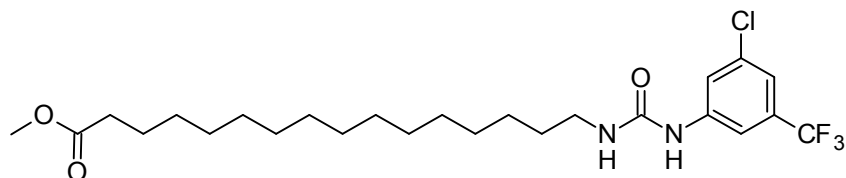

**Methyl 16-[[3-chloro-5-(trifluoromethyl)phenyl]carbamoylamino]hexadecanoate (6-Me).**

White solid, yield = 54%. Mp = 87-85°C. <sup>1</sup>H NMR (500 MHz, CDCl<sub>3</sub>): δ 7.65 (s, 1H), 7.47 (s, 1H), 7.23 (s, 1H), 6.84 (s, 1H), 4.96 (s, 1H), 3.69 (s, 3H), 3.23 (q, J = 7.0 Hz, 2H), 2.33 (t, J = 7.5 Hz, 2H), 1.62 (p, J = 7.5 Hz, 2H), 1.53 (p, J = 7.0 Hz, 2H), 1.32-1.20 (m, 22H). <sup>13</sup>C NMR (125 MHz, CDCl<sub>3</sub>): δ 174.98, 155.04, 140.88, 135.48, 132.62 (q, J = 33 Hz), 123.14 (q, J = 271 Hz), 122.10, 119.54 (q, J = 4 Hz), 115.87 (q, J = 4 Hz), 51.68, 40.62, 34.29, 31.07, 30.05,

29.51, 29.49, 29.48, 29.47 (2C), 29.37, 29.32, 29.24, 29.20, 26.92, 25.05. HRMS (ESI)  $m/z$   $[M+H]^+$  calcd for  $C_{25}H_{38}O_3N_2F_3Cl$  507.2596; found 507.2576.

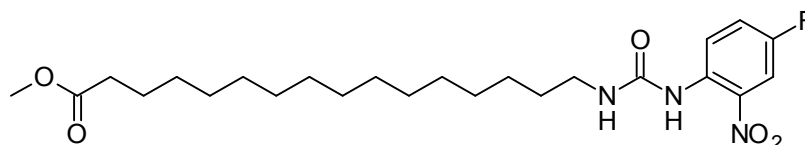

**Methyl 16-[(4-fluoro-2-nitrophenyl)carbamoylamino]hexadecanoate (7-Me).**

White solid, yield = 48%. Mp = 96-98 °C.  $^1H$  NMR (500 MHz,  $CDCl_3$ )  $\delta$  9.64 (br, 1H), 8.75 – 8.65 (m, 1H), 7.90 (dd,  $J = 8.5, 3.0$  Hz, 1H), 7.36 (dd,  $J = 8.5, 3.0$  Hz, 1H), 4.92 (br, 1H), 3.67 (s, 3H), 3.30 (q,  $J = 7.0$  Hz, 2H), 2.31 (t,  $J = 7.0$  Hz, 2H), 1.70 – 1.40 (m, 4H), 1.40 – 1.20 (m, 22H).  $^{13}C$  NMR (125MHz,  $CDCl_3$ )  $\delta$  177.09, 158.47 (d,  $J = 244$  Hz), 156.70, 137.83 (d,  $J = 8$  Hz), 136.46, 126.39 (d,  $J = 22$  Hz), 125.98 (d,  $J = 7$  Hz), 114.35 (d,  $J = 26$  Hz), 54.12, 43.42, 36.79, 33.59, 32.51, 32.23 (3C), 32.19, 32.16, 32.06, 31.93, 31.89, 31.80, 29.51, 27.62. HRMS (ESI)  $m/z$   $[M+H]^+$  calcd for  $C_{24}H_{39}O_5N_3F$  468.2868; found 468.2870.

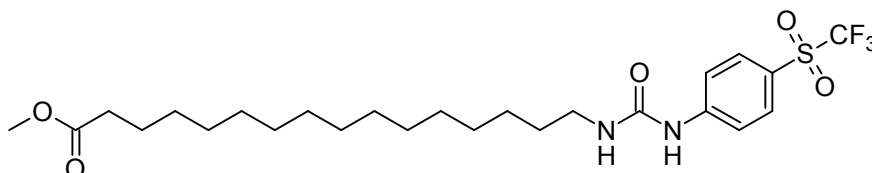

**Methyl 16-([4-(trifluoromethanesulfonyl)phenyl]carbamoyl)amino]hexadecanoate (9-Me).**

Crude product triturated with methanol to yield a white solid, yield = 41%. Mp = 122.5-123.7 °C.  $^1H$  NMR (500 MHz,  $CDCl_3$ )  $\delta$  7.91 (AA'BB', 2H), 7.68 (AA'BB', 2H), 7.05 (s, 1H), 4.96 (br s, 1H), 3.69 (s, 3H), 3.29 (q,  $J = 7.0$  Hz, 2H), 2.31 (br s, 2H), 1.60-1.40 (m, 4H), 1.40-1.15 (m, 22H).  $^{13}C$  NMR (125MHz,  $CDCl_3$ )  $\delta$  174.84, 153.82, 147.21, 132.41 (2C), 119.89 (q,  $J = 324.875$  Hz), 118.24 (2C), 112.01, 51.58, 40.55, 34.20, 29.90, 29.54, 29.31 (3C), 29.28, 29.21,

29.18, 29.11 (2C), 29.09, 26.79, 24.95. HRMS (ESI)  $m/z$   $[M+H]^+$  calcd for  $C_{25}H_{39}O_5N_2F_3$  537.2605; found 537.2614.

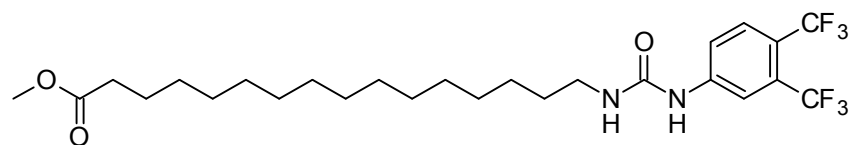

**Methyl 16-[[3,4-bis(trifluoromethyl)phenyl]carbamoylamino]hexadecanoate (10-Me).**

White solid, yield = 36%. Mp = 84-85 °C.  $^1H$  NMR (500 MHz, DMSO- $d_6$ )  $\delta$  9.23 (s, 1H), 8.16 (d,  $J$  = 2.0 Hz, 1H), 7.82 (d,  $J$  = 9.0 Hz, 1H), 7.72 (d,  $J$  = 9.0 Hz, 1H), 6.42 (t,  $J$  = 6.5 Hz, 1H), 3.55 (s, 3H), 3.07 (q,  $J$  = 6.0 Hz, 2H), 2.25 (t,  $J$  = 7.5 Hz, 2H), 1.47 (p,  $J$  = 7.0 Hz, 2H), 1.42 (p,  $J$  = 6.5 Hz, 2H), 1.22-1.39 (m, 22H).  $^{13}C$  NMR (125MHz, DMSO- $d_6$ )  $\delta$  173.77, 154.99, 145.33, 129.70 (q,  $J$  = 6 Hz), 127.37 (q,  $J$  = 34 Hz), 123.71 (q,  $J$  = 270 Hz), 123.31 (q,  $J$  = 272 Hz), 120.24, 117.58 (q,  $J$  = 34 Hz), 116.36 (q,  $J$  = 6 Hz), 51.56, 33.69, 29.93, 29.47, 29.45, 29.44, 29.43, 29.40 (2C), 29.29, 29.14, 29.10, 28.88, 26.72, 24.86. HRMS (ESI)  $m/z$   $[M+H]^+$  calcd for  $C_{26}H_{39}F_6N_2O_3$  541.2859; found 541.2862.

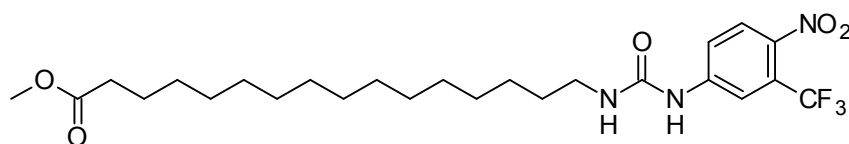

**Methyl 16-[[4-nitro-3-(trifluoromethyl)phenyl]carbamoylamino]hexadecanoate (13-Me).**

White solid, yield = 55%. Mp = 99-100 °C.  $^1H$  NMR (500 MHz, DMSO- $d_6$ )  $\delta$  9.45 (s, 1H), 8.15 (d,  $J$  = 2.5 Hz, 1H), 8.10 (d,  $J$  = 9.0 Hz, 1H), 7.72 (dd,  $J$  = 9.0, 2.5 Hz, 1H), 6.53 (t,  $J$  = 5.5 Hz, 1H), 3.55 (s, 3H), 3.07 (q,  $J$  = 7.0 Hz, 2H), 2.27 (t,  $J$  = 7.0 Hz, 2H), 1.48 (p,  $J$  = 7.5 Hz, 2H), 1.42 (p,  $J$  = 7.5 Hz, 2H), 1.50-1.30 (m, 22H).  $^{13}C$  NMR (125MHz, DMSO- $d_6$ )  $\delta$  173.78,

154.74, 146.32, 139.65, 128.35, 123.72 (q, J = 33 Hz), 122.66 (q, J = 271 Hz), 120.40, 115.77 (q, J = 6 Hz), 51.57, 33.70, 29.86, 29.47, 29.46, 29.45, 29.43, 29.40 (2C), 29.30, 29.14, 29.10, 28.88, 26.72, 24.86. HRMS (ESI)  $m/z$   $[M+H]^+$  calcd for  $C_{25}H_{39}O_5N_3F_3$  518.2836; found 518.2840.

### **General Procedure B: Ester hydrolysis**

To a solution of the ester (0.3 mmol) in ethanol (20 mL) was added 1.5M NaOH (7 mL), and the resulting solution was stirred for 3 hours at 40 °C. 1M HCl was added until the pH reached 2.0. The precipitate was extracted into dichloromethane (3 x 30 mL) and the combined organic phases were washed with water (2 x 50mL), dried over sodium sulphate and evaporated under reduced pressure.

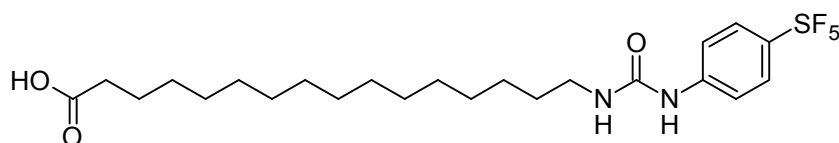

### **16-({[4-(pentafluoro- $\lambda^6$ -sulfanyl)phenyl]carbamoyl}amino)hexadecanoic acid (2).**

The crude product isolated after filtration was purified by DCVC using ethyl acetate/chloroform (10:90). White solid, yield = 80%. Mp = 101-102 °C.  $^1H$  NMR (500 MHz, DMSO- $d_6$ )  $\delta$  8.82 (s, 1H), 7.58-7.52 (m, 4H), 6.25 (t, J = 5.5 Hz, 1H), 3.07 (q, J = 6.5 Hz, 2H), 2.17 (t, J = 7.5 Hz, 2H), 1.50-1.40 (m, 4H), 1.30-1.15 (m, 22H).  $^{13}C$  NMR (125 MHz, DMSO- $d_6$ )  $\delta$  174.79, 155.47, 142.33, 140.69, 132.23 (2C), 122.41 (2C), 33.92, 30.02, 29.40, 29.39 (2C), 29.35 (2C), 29.26, 29.19, 29.10 (2C), 28.91, 26.71, 24.82. HRMS (ESI)  $m/z$   $[M+H]^+$  calcd for  $C_{23}H_{38}O_3SN_2F_5$  517.2518, found 517.2518. Anal. Calcd for  $C_{23}H_{37}O_3SN_2F_3$ : C 53.47, H 7.22, N 5.42. Found: C 53.09, H 7.07, N 5.30.





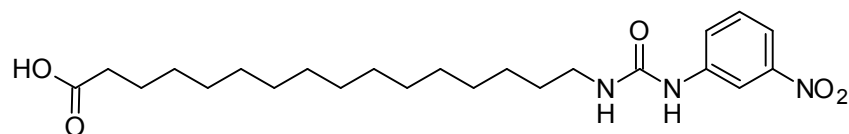

**16-[(3-nitrophenyl)carbamoylamino]hexadecanoic acid (3).**

White solid, yield = 86%. Mp = 104-105 °C. <sup>1</sup>H NMR (500 MHz, DMSO-*d*<sub>6</sub>) δ 8.94 (s, 1H), 7.96 (s, 1H), 7.49 (d, 7.5 Hz, 1H), 7.42 (t, J = 7.5 Hz, 1H), 7.18 (d, J = 7.5 Hz, 1H), 6.41 (br s, 1H), 3.06 (q, J = 6.5 Hz, 2H), 2.15 (t, J = 7.5 Hz, 2H), 1.50 - 1.36 (m, 4H), 1.30-1.20 (m, 22H). <sup>13</sup>C NMR (125 MHz, DMSO-*d*<sub>6</sub>) δ 175.01, 155.35, 148.57, 142.43, 130.30, 124.02, 115.75, 111.87, 34.20, 30.05, 29.47 (2C), 29.46 (2C), 29.43 (2C), 29.33, 29.19, 29.01, 26.78, 24.98. HRMS (ESI) *m/z* [M+H]<sup>+</sup> calcd for C<sub>23</sub>H<sub>38</sub>N<sub>3</sub>O<sub>5</sub> 436.2806; found 436.2814. Anal. Calcd for C<sub>23</sub>H<sub>37</sub>N<sub>3</sub>O<sub>5</sub>: C 63.42, H 8.56, N 9.65. Found: C 63.80, H 8.75, N 9.26.

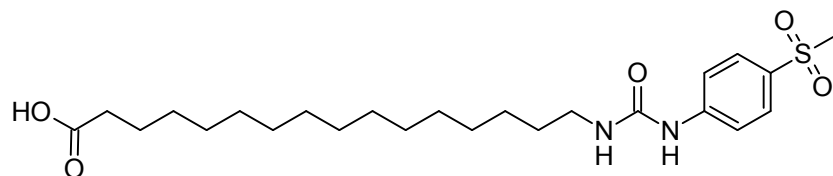

**16-([4-(methanesulfonyl)phenyl]carbamoyl)amino)hexadecanoic acid (4).**

White solid, yield = 85%. Mp = 133-134 °C. <sup>1</sup>H NMR (500 MHz, DMSO-*d*<sub>6</sub>) δ 8.98 (s, 1H), 7.73 (AA'BB', 2H), 7.60 (AA'BB', 2H), 6.34 (s, 1H), 3.20-3.00 (m, 5H), 2.17 (br, 2H), 1.55-1.40 (m, 4H), 1.35-1.15 (m, 22H). <sup>13</sup>C NMR (125 MHz, DMSO-*d*<sub>6</sub>) δ 174.67, 154.78, 145.52, 132.18, 128.31 (2C), 117.06 (2C), 44.13, 33.83, 29.69, 29.15 (3C), 29.12 (2C), 29.03, 28.88 (2C), 28.86, 28.67, 26.47, 24.63. HRMS (ESI) *m/z* [M+H]<sup>+</sup> calcd for C<sub>24</sub>H<sub>41</sub>O<sub>5</sub>SN<sub>2</sub> 469.2731; found 469.2727. Anal. Calcd for C<sub>24</sub>H<sub>40</sub>N<sub>2</sub>O<sub>5</sub>S: C 61.51, H 8.60, N 5.98. Found: C 61.37, H 8.80, N 5.72.

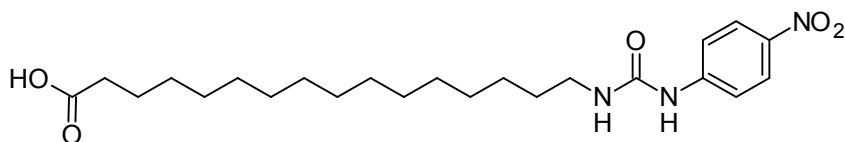

**16-[(4-nitrophenyl)carbamoylamino]hexadecanoic acid (5).**

White solid, yield = 90%. Mp = 115-116 °C. <sup>1</sup>H NMR (500 MHz, DMSO-*d*<sub>6</sub>): δ 11.76 (br, 1H), 8.88 (br, 1H), 8.06 (AA'BB', 2H), 7.71 (AA'BB', 2H), 3.03 (q, *J* = 6.0 Hz, 2H), 2.00 (t, *J* = 6.5 Hz, 2H), 1.46 (p, *J* = 7.0 Hz, 2H), 1.39 (p, *J* = 7.0 Hz, 2H), 1.30 – 1.20 (m, 22H). <sup>13</sup>C NMR (125 MHz, DMSO-*d*<sub>6</sub>) δ 177.48, 155.51, 149.16, 139.42, 125.08 (2C), 116.52 (2C), 37.27, 30.81, 29.39, 28.93, 28.78, 28.58, 28.49, 28.39, 28.22, 28.09 (2C), 27.72, 26.46, 25.92. HRMS (ESI) *m/z* [M+H]<sup>+</sup> calcd for C<sub>23</sub>H<sub>38</sub>N<sub>3</sub>O<sub>5</sub> 436.2806; found 436.2809. Anal. Calcd for C<sub>23</sub>H<sub>37</sub>N<sub>3</sub>O<sub>5</sub>: C 63.42, H 8.56, N 9.65. Found: C 63.15, H 9.41, N 9.56.

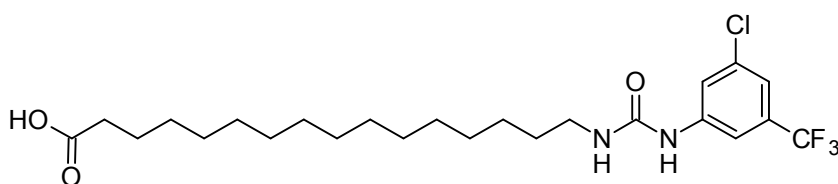

**16-[[3-chloro-5-(trifluoromethyl)phenyl]carbamoylamino]hexadecanoic acid (6).**

White solid, yield = 60%. Mp = 99-100°C. <sup>1</sup>H NMR (500 MHz, DMSO-*d*<sub>6</sub>): δ 11.95 (s, 1H), 9.00 (s, 1H), 7.75 (s, 2H), 7.27 (s, 1H), 6.39 (br, 1H), 3.06 (q, *J*=6.5 Hz, 2H), 2.17 (t, *J* = 7.0 Hz, 2H), 1.48-1.39 (m, 4H), 1.28-1.18 (m, 22H). <sup>13</sup>C NMR (125 MHz, DMSO-*d*<sub>6</sub>): δ 174.53, 154.73, 143.03, 134.08, 130.96 (q, *J* = 32 Hz), 123.38 (q, *J* = 271 Hz), 122.23, 116.71 (q, *J* = 4 Hz), 112.31 (q, *J* = 4 Hz), 33.69, 29.54, 29.06, 29.04 (2C), 29.01 (2C), 28.99, 28.92, 28.76, 28.73, 28.56, 26.30, 24.51. HRMS (ESI) *m/z* [M+H]<sup>+</sup> calcd for C<sub>24</sub>H<sub>37</sub>O<sub>3</sub>N<sub>2</sub>F<sub>3</sub>Cl 493.2439; found 493.2437. Anal. Calcd for C<sub>24</sub>H<sub>36</sub>O<sub>3</sub>N<sub>2</sub>F<sub>3</sub>Cl: C 58.47, H 7.36, N 5.68. Found: C 58.72, H 7.52, N 5.47.

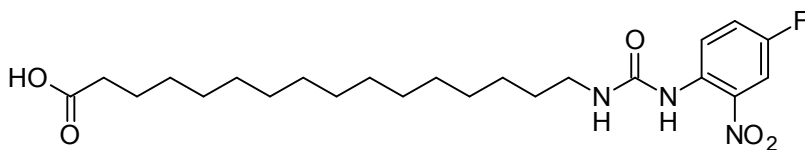

**16-[(4-fluoro-2-nitro-phenyl)carbamoylamino]hexadecanoic acid (7).**

White solid, yield = 87 %. Mp = 124-125 °C. <sup>1</sup>H NMR (500 MHz, DMSO-*d*<sub>6</sub>) δ 9.54 (br, 1H), 8.16 (d, *J* = 2.0 Hz, 1H), 8.10 (d, *J* = 8.5 Hz, 1H), 7.73 (dd, *J* = 8.5, 1.5 Hz, 1H), 6.63 (br, 1H), 3.05 (q, *J* = 6.5 Hz, 2H), 2.12 (t, *J* = 7.0 Hz, 2H), 1.45-1.39 (m, 4H), 1.30-1.10 (m, 22H). <sup>13</sup>C NMR (125MHz, DMSO-*d*<sub>6</sub>) δ 178.04, 158.28 (d, *J* = 240 Hz), 157.40, 140.38, 127.36 (d, *J* = 7 Hz), 125.39 (d, *J* = 22 Hz), 114.63 (d, *J* = 28 Hz), 37.42, 32.49, 32.07 (6C), 31.98, 31.87, 31.85, 31.76, 29.46, 27.87. HRMS (ESI) *m/z* [M+H]<sup>+</sup> calcd for C<sub>23</sub>H<sub>37</sub>O<sub>5</sub>N<sub>3</sub>F 454.2712; found 454.2717. Anal. Calcd for C<sub>23</sub>H<sub>36</sub>O<sub>5</sub>N<sub>3</sub>F: C 60.91, H 8.00, N 9.26. Found: C 60.50, H 7.81, N 9.27.

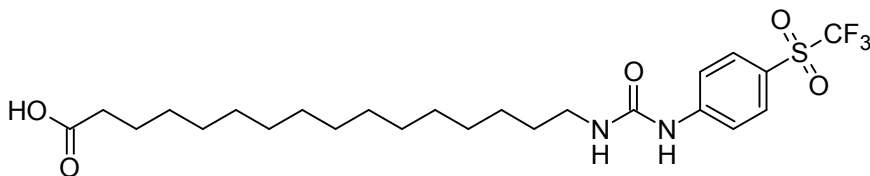

**16-([4-(trifluoromethanesulfonyl)phenyl]carbamoyl)amino]hexadecanoic acid (9).**

White solid, yield = 72%. Mp = 95-97 °C. <sup>1</sup>H NMR (500 MHz, DMSO-*d*<sub>6</sub>) δ 9.45 (s, 1H), 7.91 (AA'BB', 2H), 7.77 (AA'BB', 2H), 6.56 (br, 1H), 3.09 (q, *J* = 6.5 Hz, 2H), 2.17 (t, *J* = 7.5 Hz, 2H), 1.55-1.40 (m, 4H), 1.35-1.15 (m, 22H). <sup>13</sup>C NMR (125 MHz, DMSO-*d*<sub>6</sub>) δ 175.02, 154.67, 149.71, 132.80 (2C), 120.14 (q, *J* = 324 Hz), 119.09, 118.15 (2C), 34.20, 29.86, 29.46 (3C), 29.44, 29.42, 29.33, 29.18 (2C), 29.17, 29.00, 26.74, 24.98. HRMS (ESI) *m/z* [M+H]<sup>+</sup> calcd for C<sub>24</sub>H<sub>38</sub>O<sub>5</sub>SN<sub>2</sub>F<sub>3</sub>, 523.2448, found 523.2449. Anal. Calcd for C<sub>24</sub>H<sub>37</sub>F<sub>3</sub>N<sub>2</sub>O<sub>5</sub>S: C 55.16, H 7.14, N 5.36. Found: C 55.04, H 6.88, N 5.30.

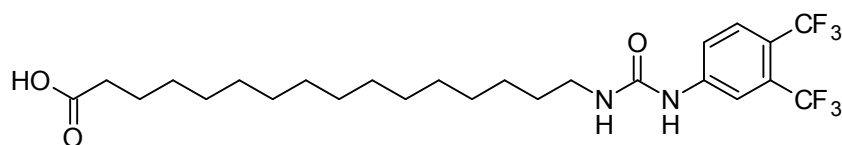

**16-[[3,4-bis(trifluoromethyl)phenyl]carbamoylamino]hexadecanoic acid (10).**

White solid, yield = 80%. Mp = 83-84 °C. <sup>1</sup>H NMR (500 MHz, CDCl<sub>3</sub>) δ 9.29 (s, 1H), 8.16 (d, J = 2.0 Hz, 1H), 7.82 (d, J = 9.0 Hz, 1H), 7.72 (d, J = 9.0 Hz, 1H), 6.47 (t, J = 6.0 Hz, 1H), 3.07 (q, J = 6.5 Hz, 2H), 2.15 (t, J = 7.0 Hz, 2H), 1.50-1.30 (m, 4H), 1.22-1.39 (m, 22H). <sup>13</sup>C NMR (125MHz, DMSO-*d*<sub>6</sub>) δ 174.98, 155.02, 145.36, 129.72 (q, J = 6 Hz), 127.31 (q, J = 32 Hz), 123.72 (q, J = 270 Hz), 123.31 (q, J = 272 Hz), 120.24, 117.55 (q, J = 33 Hz), 116.34 (q, J = 7 Hz), 34.16, 29.92, 29.47, 29.45 (2C), 29.43, 29.42, 29.40, 29.30, 29.18, 29.15, 28.99, 26.73, 24.95. HRMS (ESI) *m/z* [M+H]<sup>+</sup> calcd for C<sub>25</sub>H<sub>37</sub>F<sub>6</sub>N<sub>2</sub>O<sub>3</sub> 527.2703; found 257.2699. Anal. Calcd for C<sub>25</sub>H<sub>36</sub>F<sub>6</sub>N<sub>2</sub>O<sub>3</sub>: C 57.02, H 6.89, N 5.32. Found: C 56.92, H 6.83, N 5.29.

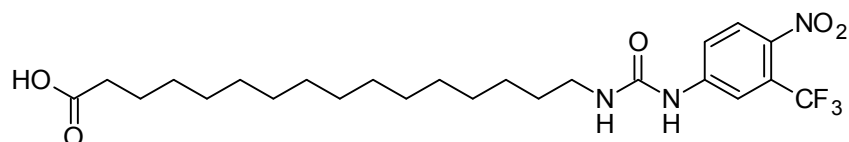

**16-[[4-nitro-3-(trifluoromethyl)phenyl]carbamoylamino]hexadecanoic acid (13).**

White solid, yield = 41%. Mp = 106-107 °C. <sup>1</sup>H NMR (500 MHz, DMSO-*d*<sub>6</sub>) δ 9.54 (br, 1H), 8.16 (d, J = 2.0 Hz, 1H), 8.10 (d, J = 9.0 Hz, 1H), 7.74 (dd, J = 9.0, 2.0 Hz, 1H), 6.23 (br, 1H), 3.09 (q, J = 6.5 Hz, 2H), 2.16 (t, J = 7.0 Hz, 2H), 1.50 – 1.40 (m, 4H), 1.30 – 1.10 (m, 22H). <sup>13</sup>C NMR (125.5 MHz, DMSO-*d*<sub>6</sub>): δ 174.63, 154.42, 146.02, 139.31, 128.04, 123.37 (q, J = 21 Hz), 122.38 (q, J = 283 Hz), 120.09, 115.44, 33.81, 29.54, 29.14 (3C), 29.10 (3C), 29.01, 28.85, 28.82, 28.66, 26.40, 24.62. HRMS (ESI) *m/z* [M+H]<sup>+</sup> calcd for C<sub>24</sub>H<sub>37</sub>O<sub>5</sub>N<sub>3</sub>F<sub>3</sub> 504.2680,

found 504.2681. Anal. Calcd for  $C_{24}H_{36}F_3N_2O_5$ : C 57.24, H 7.21, N 8.34. Found: C 57.22, H 7.39, N 8.18.

**Synthesis of 6-NNMe**

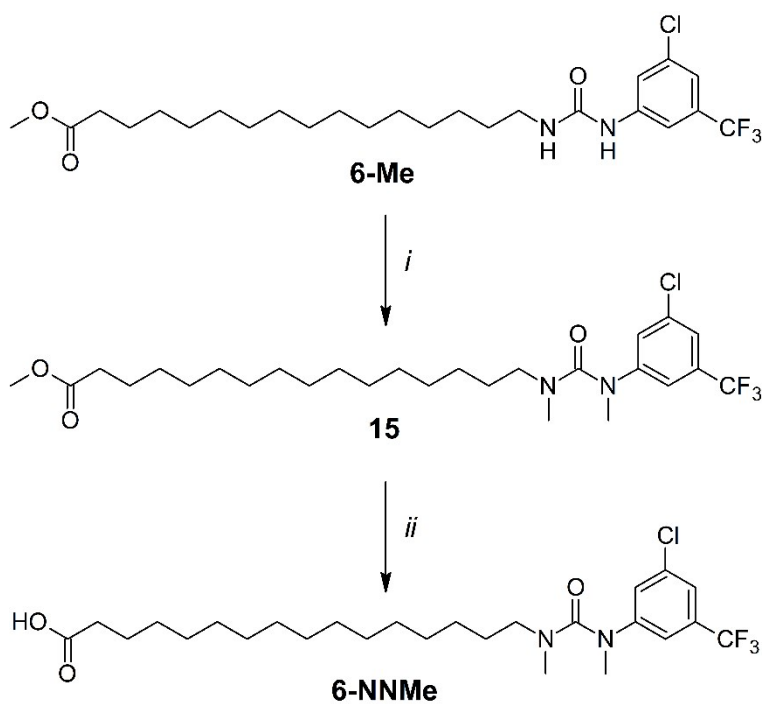

**Scheme S2.** Synthesis of 6-NNMe. Reagents and conditions (i) NaH, DMF, 0°C, 10 min, then MeI, rt, 8 h; (ii) 1.5M NaOH, ethanol, rt, 3 h.

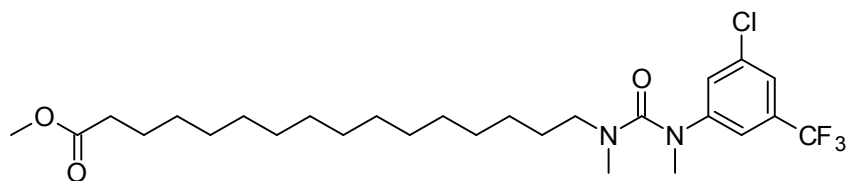

**methyl 16-[[3-chloro-5-(trifluoromethyl)phenyl](methyl)carbamoyl](methylamino)hexadecanoate (15)**

**6-Me** (0.150 g, 0.30 mmol) was dissolved in dry DMF (7 mL) under N<sub>2</sub> at 0°C. NaH (60% solution in mineral oil, 0.018 g, 0.74 mmol) was added and the reaction mixture was stirred at 0°C for 10 minutes. MeI (92 uL, 1.48 mmol) was then added and solution was stirred at room temperature for 8 hours. The reaction mixture was diluted in water (50 mL) and extracted with ethyl acetate (3 x 50 mL). The combined organic layers were washed with water (2 x 100 mL), brine (1 x 100 mL) and dried on Na<sub>2</sub>SO<sub>4</sub>, and then concentrated under reduced pressure. The residue was purified on silica gel by stepwise gradient elutions with dichloromethane/ethyl acetate (100:0 to 80:20), yielding 0.150 g (95%) of an off-white solid. Mp 39-40 °C. <sup>1</sup>H NMR (500 MHz, CDCl<sub>3</sub>): δ 7.27 (s, 1H), 7.18-7.17 (m, 1H), 7.14 (s, 1H), 3.66 (s, 3H), 3.22-3.19 (m, 5H), 2.70 (s, 3H), 2.30 (t, *J* = 7 Hz, 2H), 1.62 (p, *J* = 7 Hz, 2H), 1.49 (p, *J* = 7 Hz, 2H), 1.29-1.25 (m, 22 H). <sup>13</sup>C NMR (125 MHz, CDCl<sub>3</sub>): δ 174.5, 160.7, 148.4, 135.8, 133.1, (q, *J* = 33 Hz), 124.5, 123.2 (q, *J* = 273 Hz), 119.9, 116.4, 51.5, 50.1, 38.62, 36.05, 34.25, 29.75 (3C), 29.71, 29.70, 29.63, 29.58, 29.45, 29.38, 29.28, 27.27, 27.00, 25.09. HRMS (ESI) *m/z* [M+H]<sup>+</sup> calcd for C<sub>27</sub>H<sub>43</sub>ClF<sub>3</sub>N<sub>2</sub>O<sub>3</sub>, 535.2914; found, 535.2903.

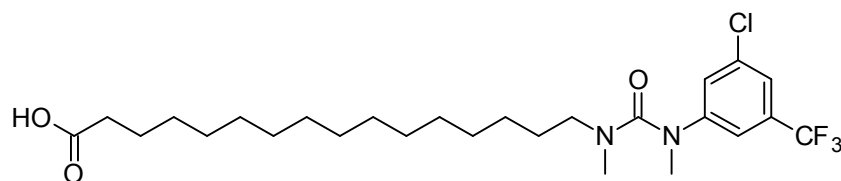

**16-[[3-chloro-5-(trifluoromethyl)phenyl](methyl)carbamoyl](methylamino)hexadecanoic acid (6-NNMe)**

Prepared from **15** according to General Procedure B. White solid, yield = 99%. Mp = 64-65 °C.  $^1\text{H}$  NMR (500 MHz,  $\text{DMSO-}d_6$ ):  $\delta$  11.94 (s, 1H), 7.39 (s, 1H), 7.35 (s, 1H), 7.22 (s, 1H), 3.20 (t,  $J = 8.5$  Hz, 2H), 3.12 (s, 3H), 2.70 (s, 3H), 2.17 (t,  $J = 7$  Hz, 2H), 1.48-1.41 (m, 4H), 1.25-1.17 (m, 22H).  $^{13}\text{C}$  NMR (125 MHz,  $\text{DMSO-}d_6$ ):  $\delta$  174.4, 159.8, 147.9, 134.6, 131.5 (q,  $J = 32$  Hz), 123.2 (q,  $J = 273$  Hz), 122.7, 117.8, 114.5, 48.96, 37.27, 35.21, 33.65, 29.00, 28.99 (3C), 28.92, 28.90, 28.75, 28.66, 28.55, 26.51, 26.19, 24.49. HRMS (ESI)  $m/z$   $[\text{M}+\text{H}]^+$  calcd for  $\text{C}_{26}\text{H}_{41}\text{ClF}_3\text{N}_2\text{O}_3$ , 521.2758; found, 521.2750. Purity by Q-NMR = 96.1%.

## 6. Experimental procedures – Crystallography

Single crystals of **6** and **6**-DMF solvate were obtained by vapour diffusion of H<sub>2</sub>O and Et<sub>2</sub>O, respectively, into DMF solutions of **6**. The crystals were mounted on a MITIGEN holder with paratone-N oil. Data were collected using a SuperNova-Duo, Atlas diffractometer equipped with an Oxford Cryosystems low-temperature device operating at  $T = 100(2)$  K. The structure was solved with the olex2.solve 1.3<sup>[6]</sup> structure solution program using the Charge Flipping solution method and by using **Olex2**<sup>[7]</sup> as the graphical interface. The model was refined with version 2018/3 of ShelXL 2018/3<sup>[8]</sup> using Least Squares minimisation.



| <b>Compound</b>                                | <b>6</b>                                                                       | <b>6-DMF</b>                                                                   |
|------------------------------------------------|--------------------------------------------------------------------------------|--------------------------------------------------------------------------------|
| Formula                                        | C <sub>24</sub> H <sub>36</sub> ClF <sub>3</sub> N <sub>2</sub> O <sub>3</sub> | C <sub>27</sub> H <sub>43</sub> ClF <sub>3</sub> N <sub>3</sub> O <sub>4</sub> |
| <i>D</i> <sub>calc.</sub> / g cm <sup>-3</sup> | 1.337                                                                          | 1.305                                                                          |
| μ/mm <sup>-1</sup>                             | 1.824                                                                          | 1.656                                                                          |
| Formula Weight                                 | 493.00                                                                         | 566.09                                                                         |
| Colour                                         | clear colourless                                                               | clear colourless                                                               |
| Size / mm <sup>3</sup>                         | 0.40×0.05×0.02                                                                 | 0.186×0.094×0.041                                                              |
| <i>T</i> / K                                   | 100(2)                                                                         | 100(2)                                                                         |
| Crystal System                                 | monoclinic                                                                     | triclinic                                                                      |
| Space Group                                    | <i>P</i> 21/ <i>c</i>                                                          | <i>P</i> -1                                                                    |
| <i>a</i> / Å                                   | 19.0452(4)                                                                     | 10.4481(3)                                                                     |
| <i>b</i> / Å                                   | 7.53882(12)                                                                    | 13.0857(4)                                                                     |
| <i>c</i> / Å                                   | 18.2425(4)                                                                     | 21.6967(8)                                                                     |
| α / °                                          | 90                                                                             | 90.279(3)                                                                      |
| β / °                                          | 110.706(2)                                                                     | 98.533(3)                                                                      |
| γ / °                                          | 90                                                                             | 100.758(2)                                                                     |
| <i>V</i> / Å <sup>3</sup>                      | 2450.04(9)                                                                     | 2880.37(16)                                                                    |
| <i>Z</i>                                       | 4                                                                              | 4                                                                              |
| <i>Z'</i>                                      | 1                                                                              | 1                                                                              |
| Wavelength / Å                                 | 1.54184                                                                        | 1.54184                                                                        |
| Radiation type                                 | Cu Kα                                                                          | Cu Kα                                                                          |
| θ <sub>min</sub> / °                           | 4.892                                                                          | 3.951                                                                          |
| θ <sub>max</sub> / °                           | 72.689                                                                         | 72.738                                                                         |
| Measured Refl.                                 | 16382                                                                          | 20897                                                                          |
| Independent Refl.                              | 4788                                                                           | 11109                                                                          |
| <i>R</i> <sub>int</sub>                        | 0.0323                                                                         | 0.0258                                                                         |
| Parameters                                     | 382                                                                            | 784                                                                            |
| Restraints                                     | 229                                                                            | 379                                                                            |
| Largest Peak                                   | 0.293                                                                          | 0.27                                                                           |
| Deepest Hole                                   | -0.351                                                                         | -0.35                                                                          |
| Goof                                           | 1.066                                                                          | 1.027                                                                          |
| <i>wR</i> <sub>2</sub> (all data)              | 0.1066                                                                         | 0.1141                                                                         |
| <i>wR</i> <sub>2</sub>                         | 0.1019                                                                         | 0.1042                                                                         |
| <i>R</i> <sub>1</sub> (all data)               | 0.0458                                                                         | 0.0549                                                                         |
| <i>R</i> <sub>1</sub>                          | 0.0394                                                                         | 0.0406                                                                         |

## 7. Experimental procedures – Computational Methodology

### *Calculation of Aqueous pKa Values*

To investigate the possible role of fatty acid aryl ureas in a mitochondrial uncoupling mechanism, we first calculated the pKa of the urea NH proton most proximal to the ring for each of the derivatives shown in Table 1 using a high accuracy thermochemistry method. The studied fatty acid aryl ureas are too large to be considered in their entirety without significant computational expense. Furthermore, the 16-carbon tail will likely have a minimal effect on pKa values at the urea NH proton proximal to the ring. To this end, model compounds were constructed by truncating the 16-carbon tail of the structures in Table 1 to a propyl moiety. The resulting structures are shown in Table S1. pKa calculations were conducted using an isodesmic proton exchange method, otherwise known as a relative pKa calculation. The G3(MP2)CC(+)<sup>9,10</sup> composite procedure was used to obtain ab initio gas phase reaction energies from geometries optimised using the M06-2X functional<sup>11</sup> and 6-31+G(d) basis set.<sup>12-16</sup> The G3(MP2)CC(+) composite procedure is a modification of the original G3(MP2)CC variant of Gaussian-n theory<sup>9,10</sup> in which calculations with the 6-31G(d) basis set have been replaced by the 6-31+G(d) basis set, allowing improved description of anionic species.<sup>17</sup> The G3(MP2)CC(+) procedure has demonstrated high accuracy for determination of pKa values over a range of studies and compound classes.<sup>17-18</sup> As stated above, ab initio gas-phase reaction energies were computed using the G3(MP2)CC(+) composite method, using geometries optimised at the M06-2X/6-31+G(d) level of theory. DFT geometry optimisations and MP2 calculations were carried out in Gaussian09, Revision E.01,<sup>19</sup> while CCSD(T) calculations were carried out with QChem 5.0<sup>20</sup> using the libxm tensor backend.<sup>21</sup> Frequency calculations were conducted at each DFT optimised geometry to ensure a minimum on the potential energy surface had been located. Gas and solvent phase optimised geometries are provided in Supporting Information. Gas phase free energies at 298.15 K were obtained by inclusion of

zero-point vibrational energy, thermal corrections and entropies calculated from the frequencies of the M06-2X/6-31+G(d) optimised geometry. Standard statistical mechanics formulae for an ideal gas were used, invoking the rigid-rotor/harmonic oscillator approximation.<sup>22</sup> Scale factors for the M06-2X functional were used to correct the frequencies.<sup>23</sup> The G3(MP2)CC(+) protocol includes spin orbit (SO) and high level correction (HLC) terms which can be neglected in this case as relative pKa calculations do not involve atomic species and the total number of valence alpha and beta electrons is conserved. Solvation free energies were obtained using the SMD continuum solvation model,<sup>24</sup> in which the free energy of solvation is obtained from the difference of electronic energies in the gas-phase and implicit solvent at each respective optimised geometry.<sup>25</sup> Proton exchange methods for computing pKa values rely on choice of a reference species similar to the target compound to maximise cancellation of errors. Triclocarban (TCC) and diphenylurea (DPU) were chosen as reference species with published experimental pKa values of 12.7<sup>26</sup> and 12.59<sup>27</sup> respectively. For the formula used to obtain pKa values from an isodesmic proton exchange reaction and a comprehensive overview of pKa calculation strategies, the reader is directed to Ho & Coote.<sup>17</sup> pKa values obtained using each reference species (TCC and DPU) varied by ~0.5 pKa units, well within desired error for the calculation of aqueous pKa values.<sup>17</sup> Values stated in the main text are for those obtained using TCC as the reference species. Values for TCC and DPU are presented in Table S1, while components used in their calculation are presented in Table S3.

#### Calculation of Free Energies of Carboxylate Complexation

In light of experimentally determined uncoupling by the studied fatty acid aryl ureas, reaction energies were computed for binding of a model carboxylate compound, to each of the model compounds presented in Table S1. Propanoate was used as a model compound for carboxylic acids in this work, and the same truncated model compounds were used for the fatty acid aryl ureas as in the pKa calculations. Gas phase reaction energies for complexation of propanoate

were computed at the M06-2X/6-31+G(d) level of theory, using the Boys-Bernardi counterpoise correction for basis set superposition error (BSSE).<sup>28,29</sup> Gas phase free energies were obtained by the same method as described above for the pKa calculations. Solvation free energies were obtained in a non-polar solvent, n-pentadecane and in water using the SMD continuum solvent model,<sup>24</sup> yielding reaction free energies in each of these two solvents. These are termed  $\Delta G_{\text{bind}}\text{propanoate}$  (or  $\Delta G_{\text{bind}}\text{prop}$ ) with the appropriate solvent indicated with brackets eg  $\Delta G_{\text{bind}}\text{propanoate}(\text{water})$  (or  $\Delta G_{\text{bind}}\text{prop}(\text{water})$ ). Resulting free energies in the studied solvents are presented in Table S1. Components used in their calculation are presented in Table S4.

### ***Calculation of Model Compound lipophilicity***

Gibbs Free Energies of solvation ( $\Delta G_{\text{Solv}}$ ) were calculated for transferring the model fatty acid aryl urea compounds from water to n-pentadecane, either in isolation or in complex with propanoate. These will be referred to as  $\Delta G_{\text{Solv}}\text{Monomer}_{(\text{W-P})}$  and  $\Delta G_{\text{Solv}}\text{Complex}_{(\text{W-P})}$  respectively. Each of these values was calculated by subtracting the  $\Delta G_{\text{Solv}}$  in water from that in n-pentadecane. This provides a relative measure of the lipophilicity of each of the model compounds, either in isolation or in complex with propanoate.  $\Delta G_{\text{Solv}}\text{Monomer}_{(\text{W-P})}$  and  $\Delta G_{\text{Solv}}\text{Complex}_{(\text{W-P})}$  values are tabulated in Table S2. Components used in their calculation are presented in Table S4.

### ***Molecular Dynamics Simulations***

To examine the interaction of a prototypical fatty acid aryl urea compound with a model bilayer, molecular dynamics simulations were conducted. Compound **6** was chosen for simulations as it had the most complete experimentally determined SAR. Both the carboxylate and carboxylic acid protonation states were simulated, referred to as **6-D** and **6** for deprotonated and protonated compound **6**, respectively.

A 128 lipid united atom 1,2-dioleoyl-sn-glycero-3-phosphocholine (DOPC) bilayer was used as a model bilayer, to mimic the tethered DOPC bilayer setup on which these compounds were tested. As phosphocholine lipids make up ~ 40% of the mitochondrial inner membrane,<sup>30</sup> DOPC was chosen as a physiologically relevant model bilayer for both the simulation and tethered bilayer setup. DOPC parameters were obtained from Poger et al<sup>31,32</sup> and united atom parameters for compounds **6-D** and **6** were obtained from the Automated Topology Builder (ATB).<sup>33</sup> As the uncouplers are large by ATB standards (>40 atoms), the ATB-QM1 parameterisation was used, involving optimisation at the AM1 semi-empirical level of theory and assignment of MOPAC charges.<sup>33</sup>

The 128 DOPC bilayer was obtained pre-equilibrated from the ATB, with the bilayer oriented in the x-y plane.<sup>33</sup> The size of the box was extended in the z-direction to 14.3 nm, and the system was resolvated in the larger rectangular box. 100mM of NaCl was added to the solvent. For each of the systems, namely **6-D** and **6**, 5 molecules of the target compound were placed randomly in the water layer such that they were closer than half the box length to the positive z-axis of the bilayer. For each of the systems, this placement process was conducted four times to obtain four replicates for each system, giving a total of 8 replicates.

All simulations were performed using the GROMACS 2018 simulation package<sup>34-36</sup> under periodic boundary conditions. The temperature of the system was maintained at 310 K by coupling to an external bath using the Bussi velocity rescaling thermostat<sup>37</sup> and a temperature coupling constant of 0.1 ps. The pressure of the system was maintained at 1 bar with semi-isotropic pressure coupling, using an iso-thermal compressibility of  $4.5 \times 10^{-5} \text{ bar}^{-1}$  and a coupling constant of 5 ps. A Berendsen barostat<sup>38</sup> was used for equilibration to ensure

stabilization of the box volume, followed by a Parinello-Rahman barostat<sup>39</sup> for production simulation. A timestep of 2 fs was used for all simulations. The LINCS<sup>40</sup> algorithm to constrain the length of covalent bonds to hydrogen atoms. Nonbonded interactions were calculated using particle mesh Ewald (PME) method<sup>41</sup> and a Verlet scheme, with a single cutoff of 1.4 nm. Each of the 8 systems was energy minimized, prior to 50 ns of equilibration. A one sided, flat-bottom harmonic restraint with a force constant of 20 kJ/mol and active distance of 6 nm was placed between the z axis distance between the center of mass of each of uncoupler molecules and the center of mass of the DOPC bilayer to ensure the aryl urea uncouplers annealed to the upper leaflet of the bilayer rather than passing through the periodic boundary and annealing to both leaflets. Each replicate was then simulated for 1  $\mu$ s. The flat bottom restraint did not exert any force on the system during production replicates, ie the **6** and **6-D** molecules successfully annealed to the upper leaflet of the bilayer during the equilibration phase.

The final frame of each of the 4 **6-D** simulation replicates was used to initiate a set of systems, containing 20 uncoupler molecules in total: the original 5 deprotonated **6-D** molecules and 15 protonated **6** molecules. The additional 15 **6** molecules were placed in the water solvent layer next to the upper leaflet, using the same methodology as described above. These four systems were also simulated for 1  $\mu$ s, using the same simulation protocol as described above. In total, this gave 12  $\mu$ s of simulation across all systems.

### *Analysis*

Analysis was conducted using VMD<sup>42</sup> and MDTraj<sup>43</sup> python scripts.

### *Data availability*

Gaussian archive files for all optimised geometries are attached as Supporting Information.

Additionally, these along with Gaussian logfiles are available on Github:

<https://github.com/hmacdope/Fatty-Acid-Aryl-Urea-QC-data>. Molecular dynamics

topologies employed in this work are available on FigShare at:

<https://doi.org/10.6084/m9.figshare.12095223.v1>

## 8. Experimental procedures – NMR studies

### Concentration-dependent $^1\text{H}$ NMR studies

A suspension of compound **6** in  $\text{CDCl}_3$  was treated with 1.0 equivalent of tetrabutylammonium hydroxide (TBAOH, ~40% in  $\text{H}_2\text{O}$ ) and sonicated for 20 min to give a clear solution of **6**-TBAOH at 5 mM. The solution was diluted to various concentrations in  $\text{CDCl}_3$  and subject to  $^1\text{H}$  NMR measurements on a Bruker AVANCE III 400 NMR Spectrometer. The data was fitted to a monomer-dimer equilibrium model.<sup>44</sup> Due to the ambiguity of relative peak positions during the dilution experiment and the overlap of one of the aromatic CH peaks of **6** with the  $\text{CHCl}_3$  peak at the lowest concentration tested, the average chemical shifts of the two aromatic CH peaks from 7.5 to 7.9 ppm  $[(\delta_{\text{ArH1}} + \delta_{\text{ArH2}})/2]$  were used for data fitting.

### Diffusion NMR studies

Pulse field gradient diffusion NMR experiments were performed on a Bruker Avance III 600 MHz Cryo NMR at 298 K with uncalibrated gradient strengths. The data were analysed using Bruker TopSpin 4.0.9. To obtain the absolute diffusion coefficients, the diffusion coefficient of  $\text{CHCl}_3$  in  $\text{CDCl}_3$  was measured and compared with a literature value.<sup>45</sup> The ratio between the literature and experimental values of diffusion coefficient of  $\text{CHCl}_3$  was used to calibrate the data.



## 9. NMR Spectra of test compounds

$^1\text{H}$  NMR spectrum of **2** (500 MHz,  $\text{DMSO-}d_6$ )

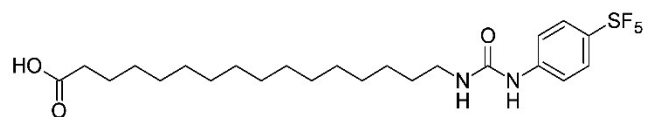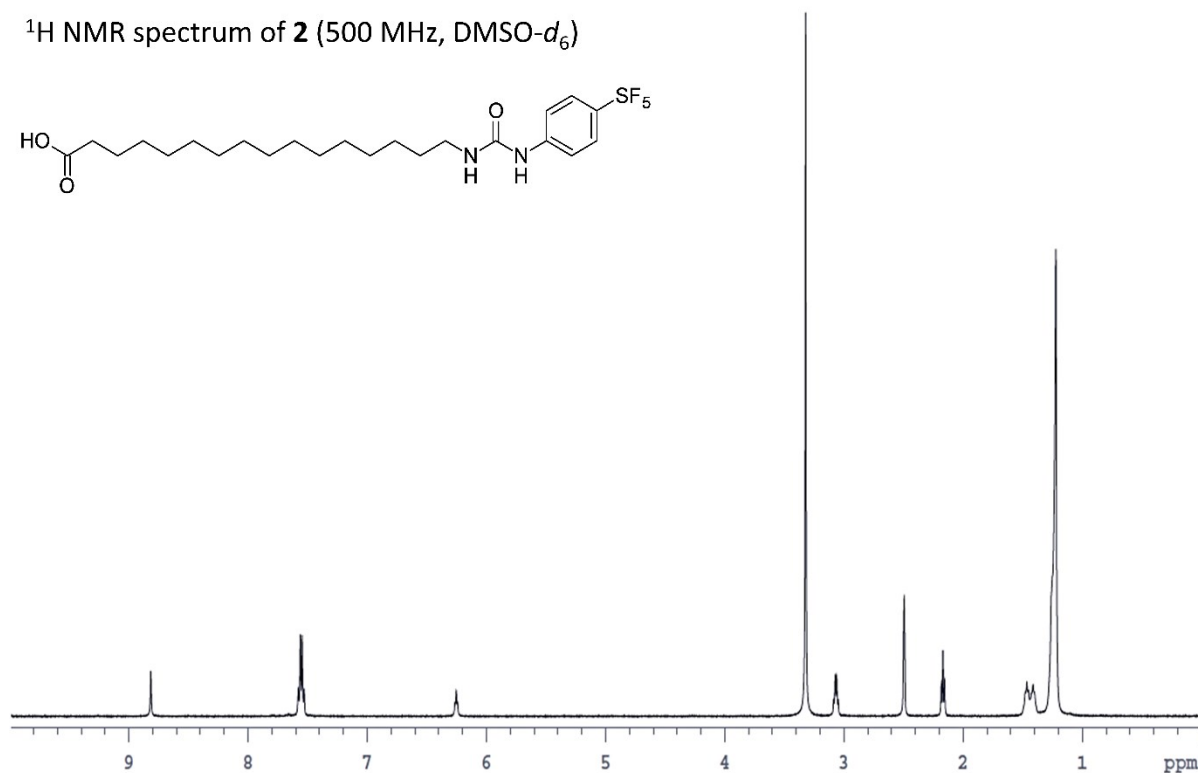

$^{13}\text{C}$  NMR spectrum of **2** (125 MHz,  $\text{DMSO-}d_6$ )

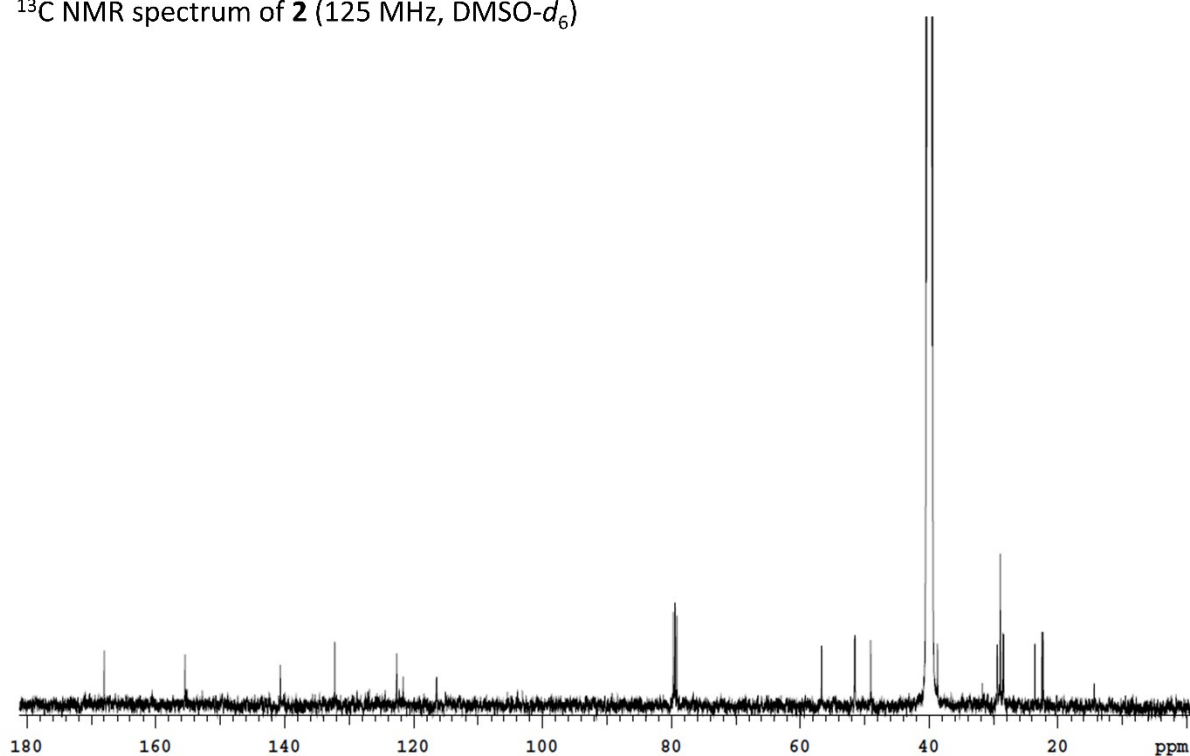



$^1\text{H}$  NMR spectrum of **4** (500 MHz,  $\text{DMSO-}d_6$ )

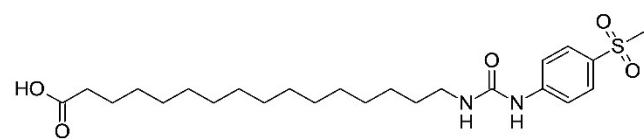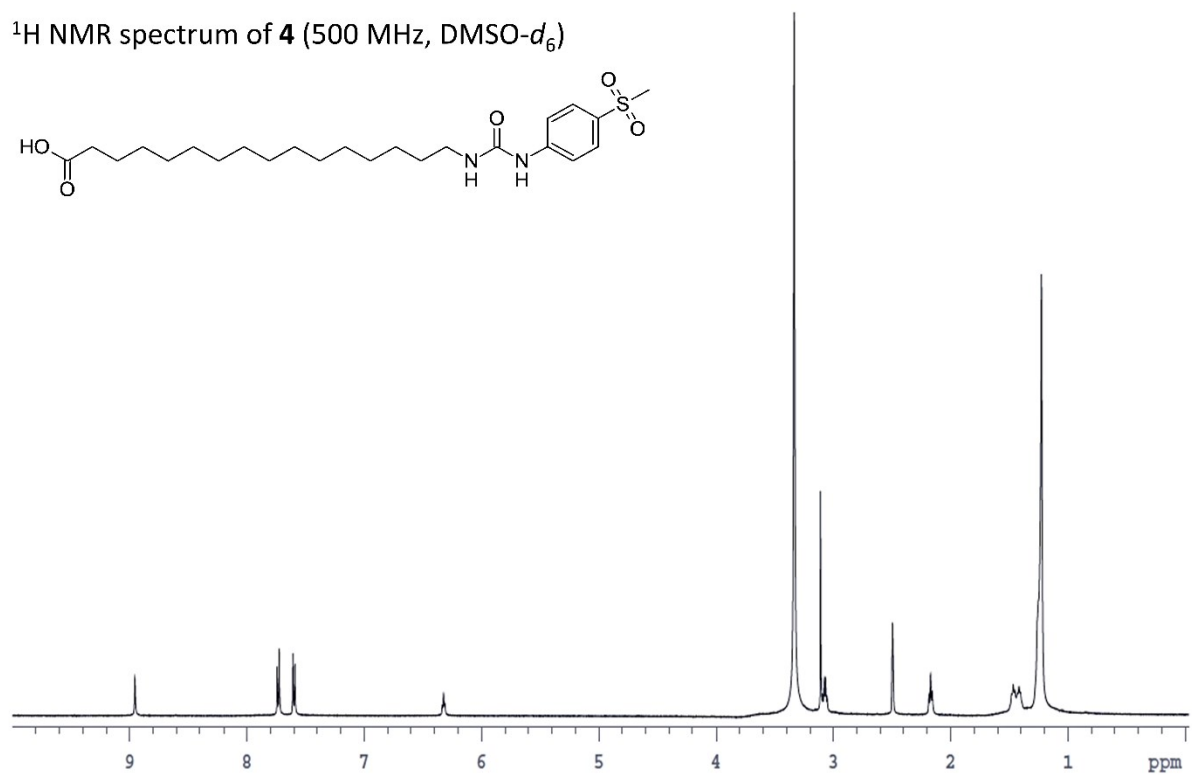

$^{13}\text{C}$  NMR spectrum of **4** (125 MHz,  $\text{DMSO-}d_6$ )

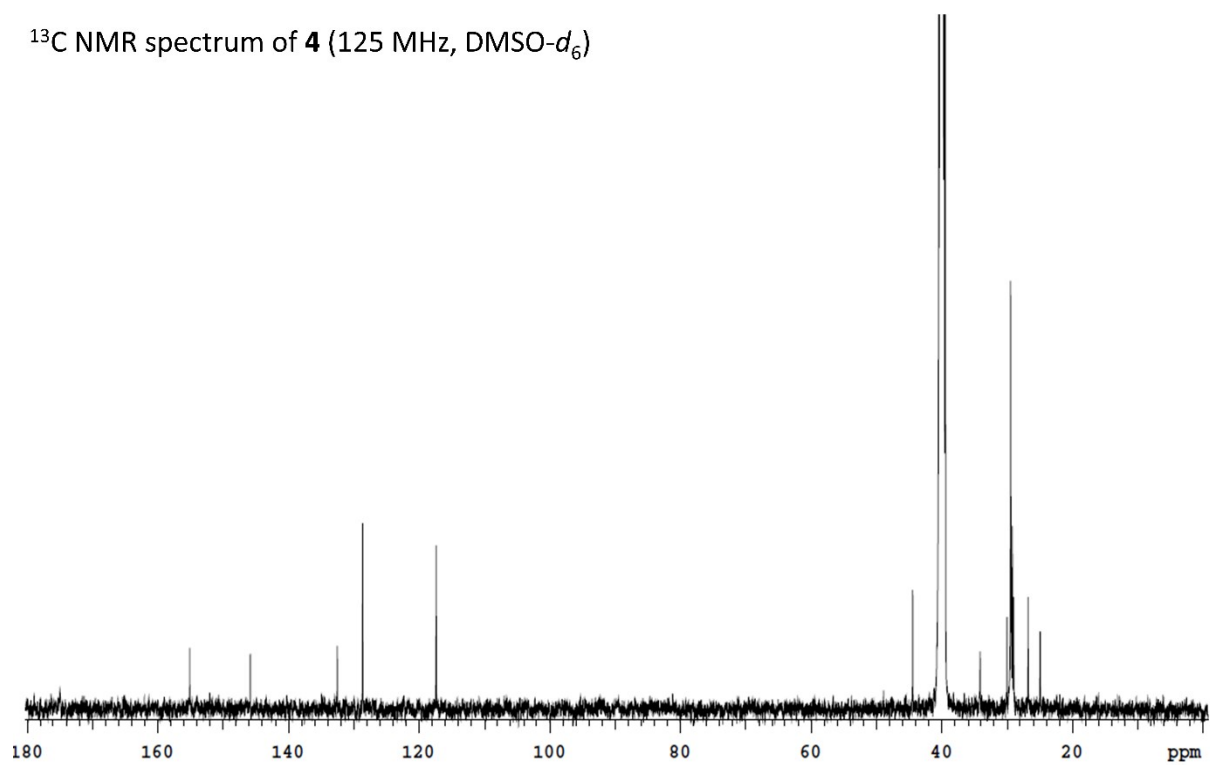

$^1\text{H}$  NMR spectrum of **5** (500 MHz,  $\text{DMSO}-d_6$ )

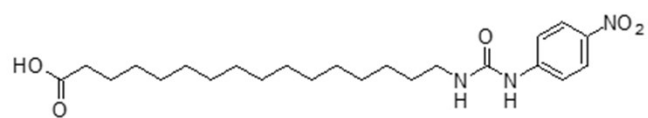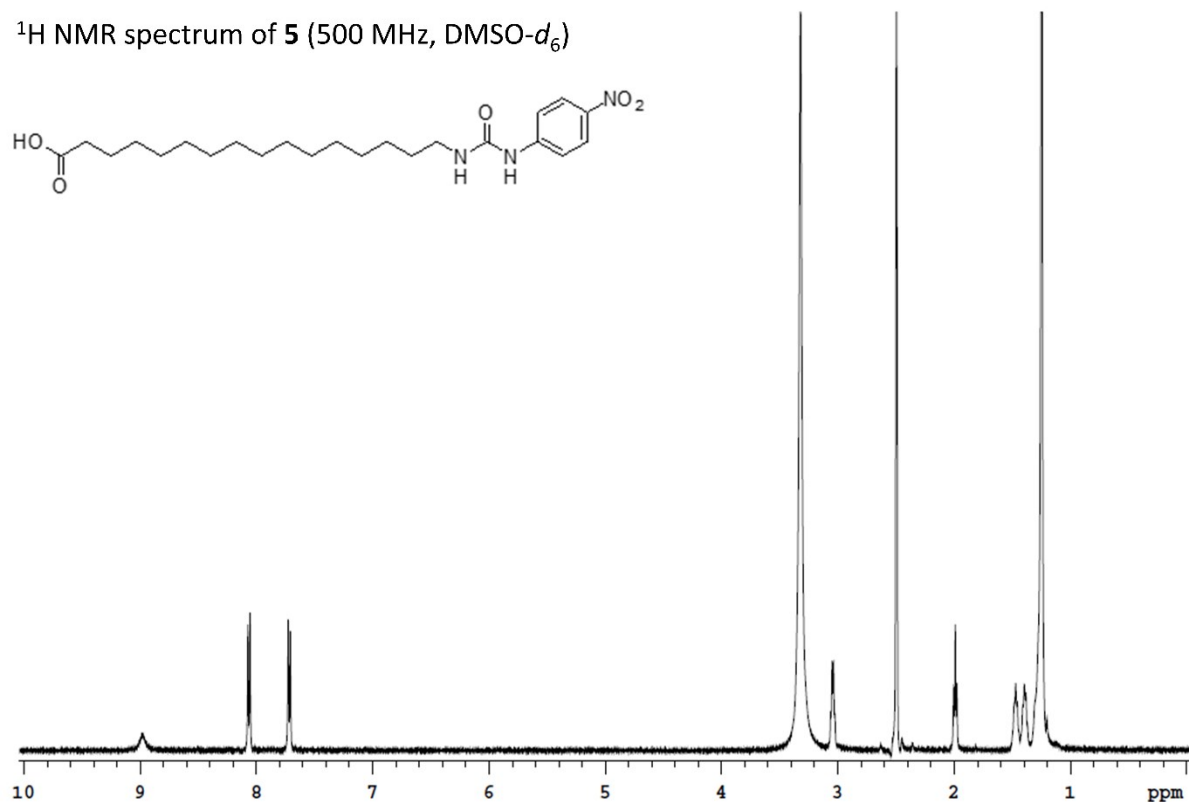

$^{13}\text{C}$  NMR spectrum of **5** (125 MHz,  $\text{DMSO}-d_6$ )

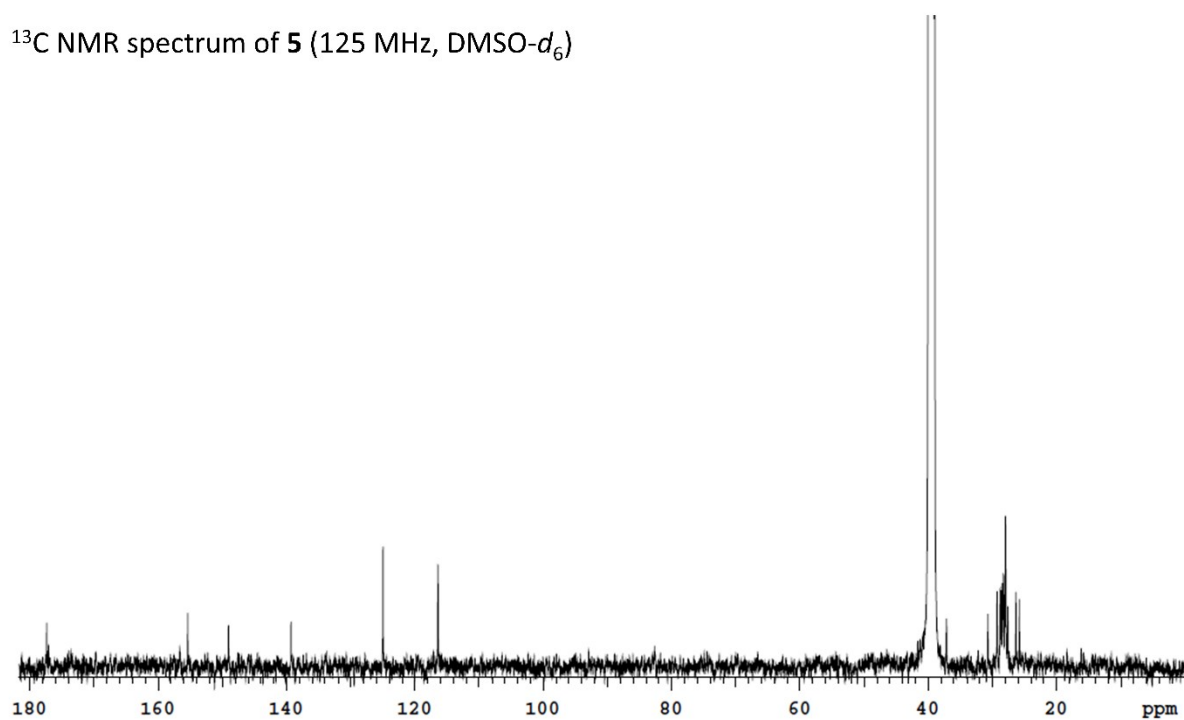

$^1\text{H}$  NMR spectrum of **6** (500 MHz,  $\text{DMSO-}d_6$ )

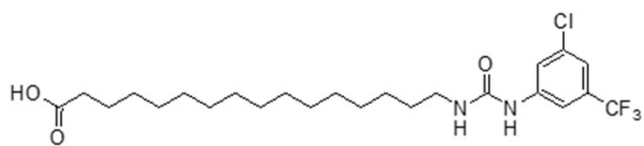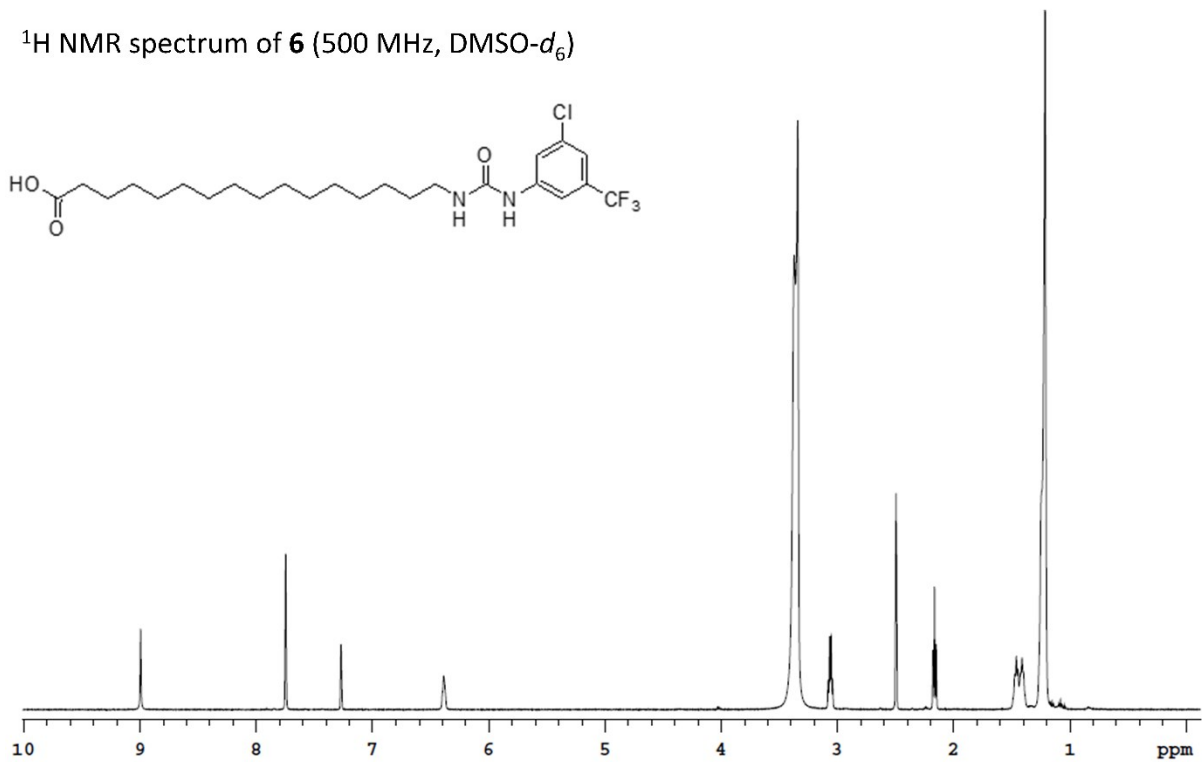

$^{13}\text{C}$  NMR spectrum of **6** (125 MHz,  $\text{DMSO-}d_6$ )

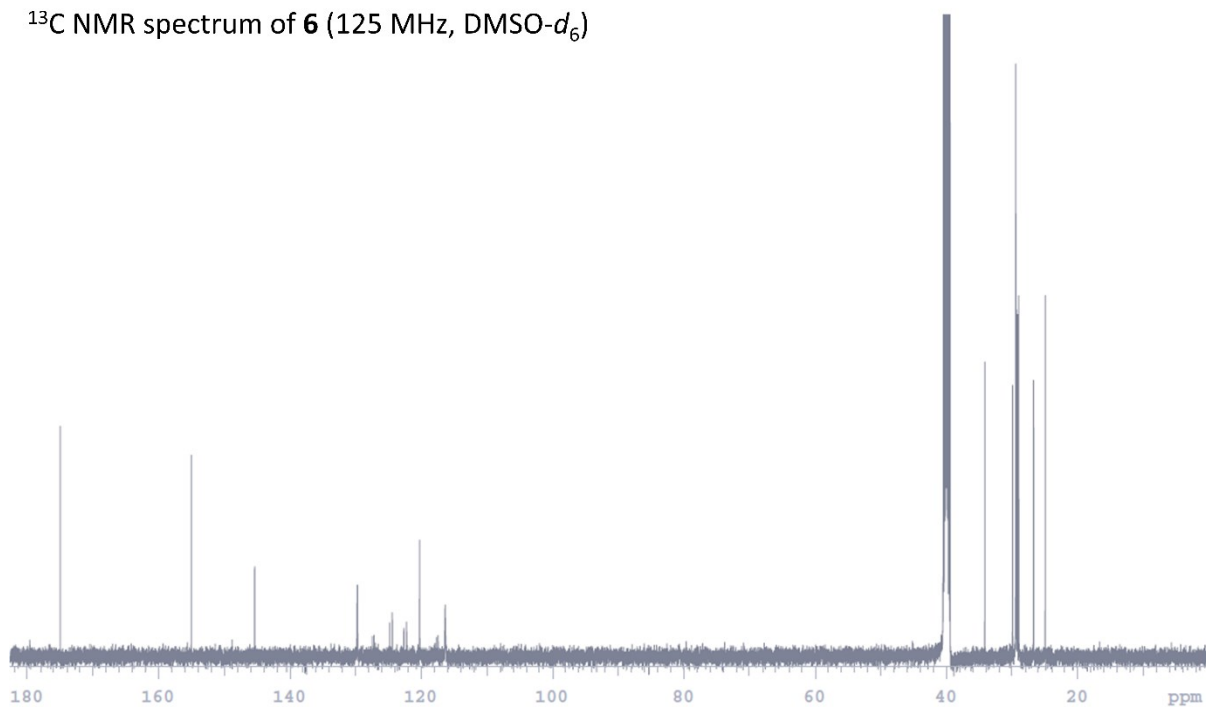

$^1\text{H}$  NMR spectrum of **6-Me** (500 MHz,  $\text{DMSO-}d_6$ )

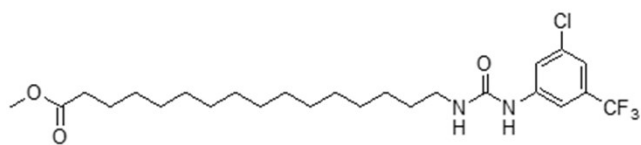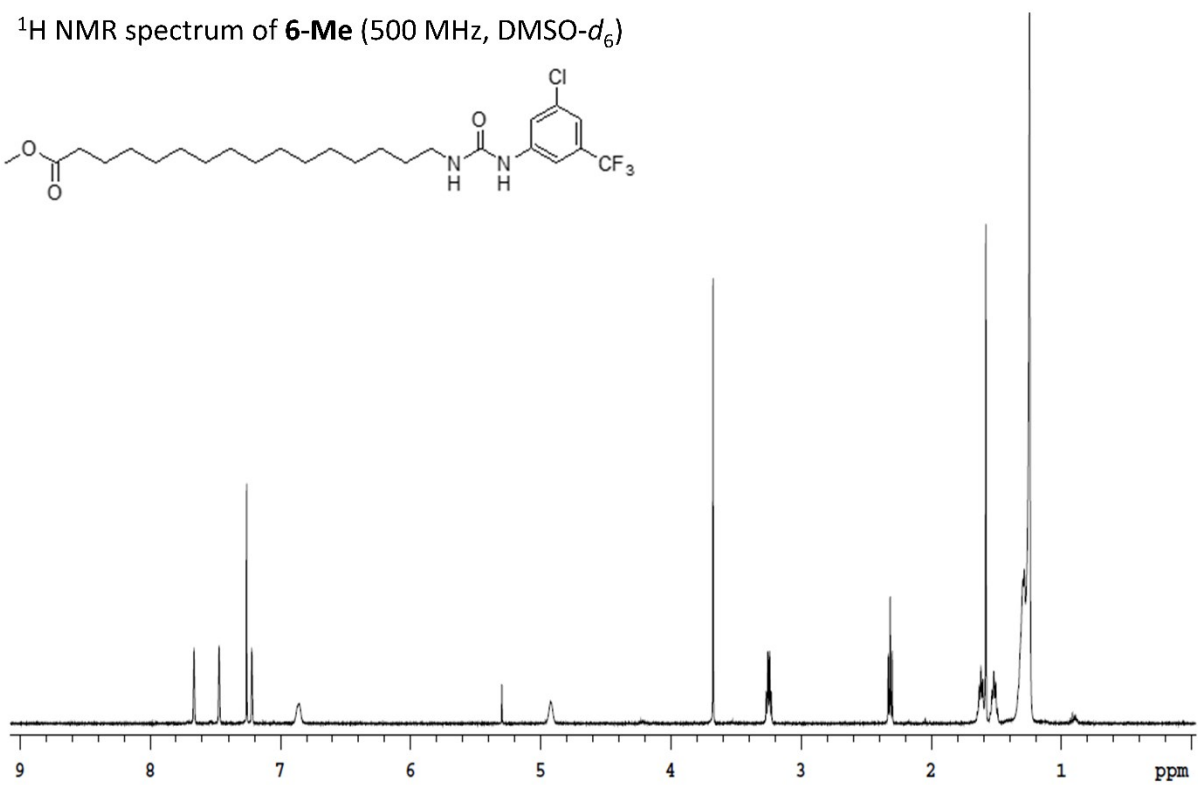

$^{13}\text{C}$  NMR spectrum of **6-Me** (125 MHz,  $\text{DMSO-}d_6$ )

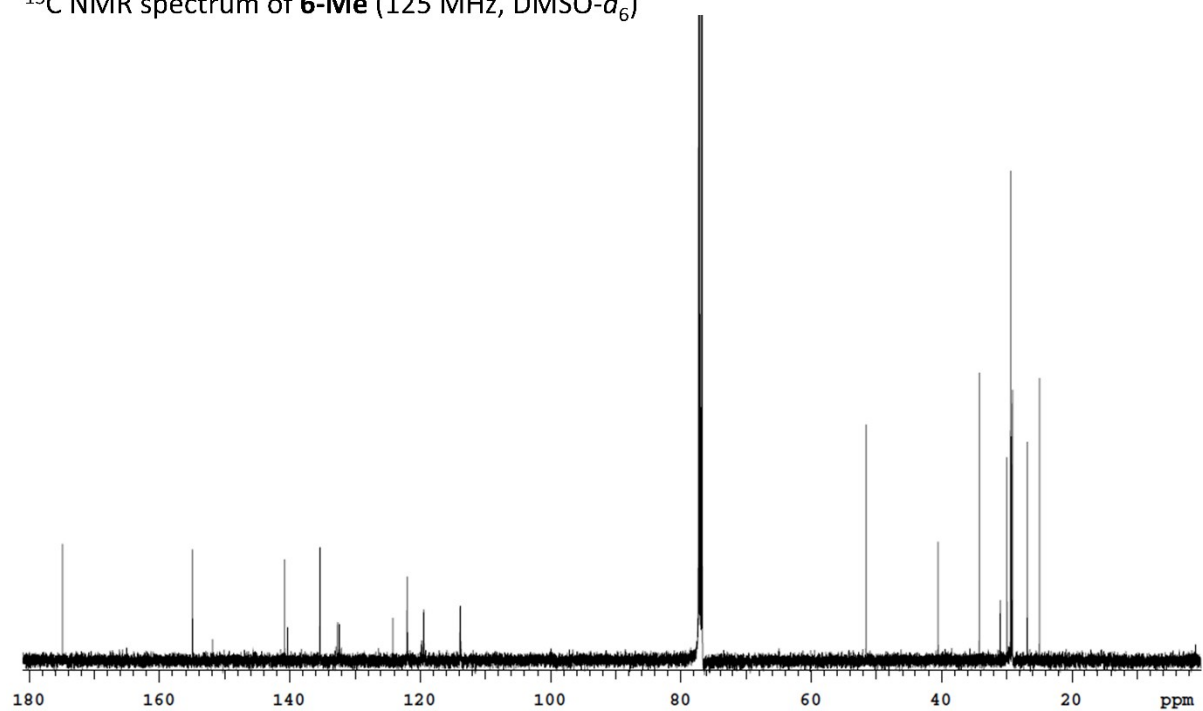

$^1\text{H}$  NMR spectrum of **6-NNMe** (500 MHz,  $\text{DMSO-}d_6$ )

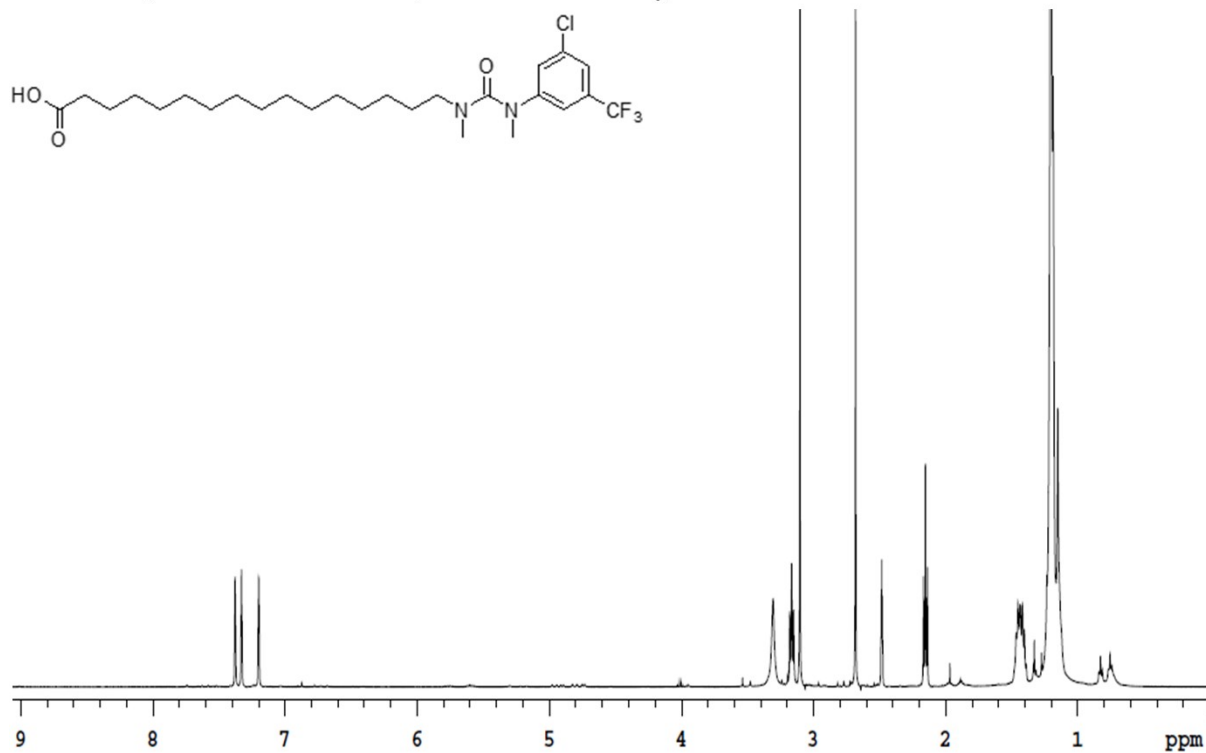

$^{13}\text{C}$  NMR spectrum of **6-NNMe** (125 MHz,  $\text{DMSO-}d_6$ )

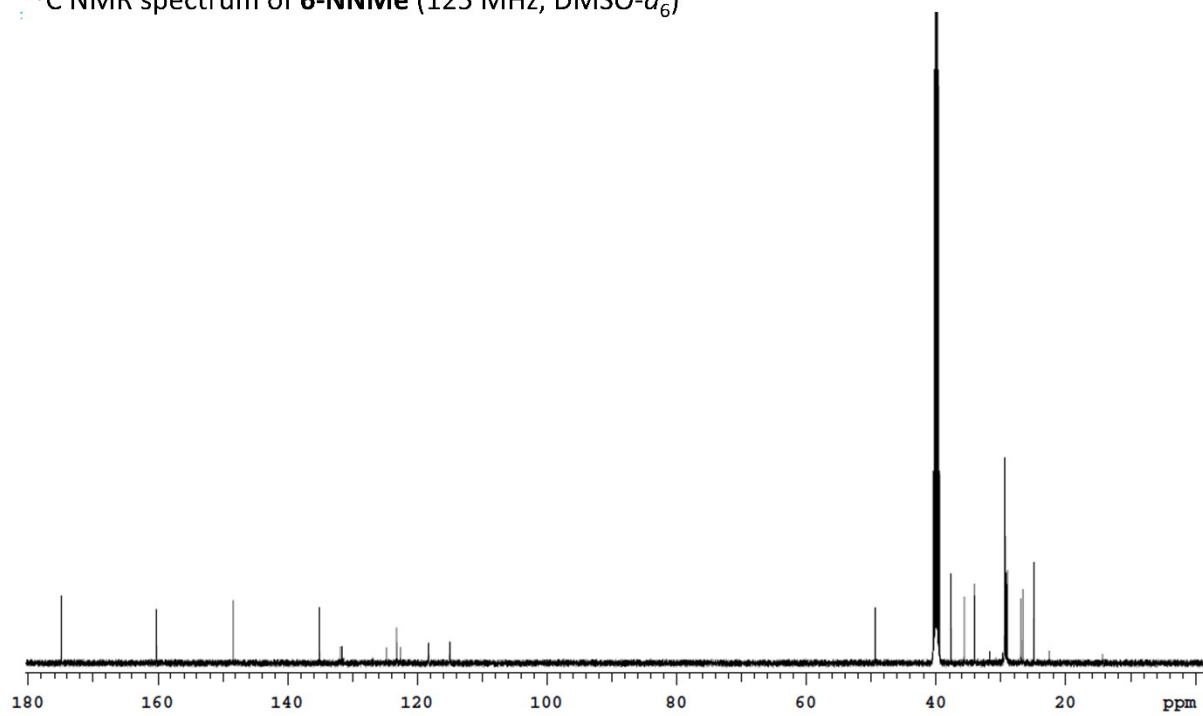

$^1\text{H}$  NMR spectrum of **7** (500 MHz,  $\text{DMSO-}d_6$ )

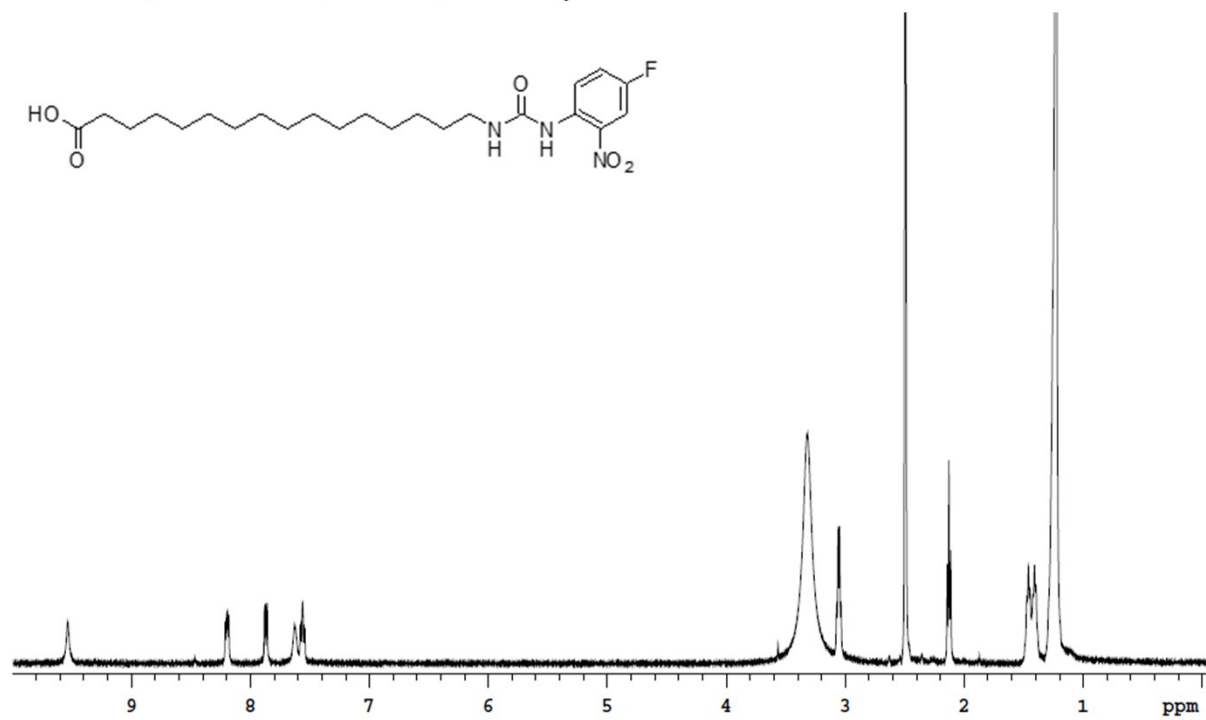

$^{13}\text{C}$  NMR spectrum of **7** (125 MHz,  $\text{DMSO-}d_6$ )

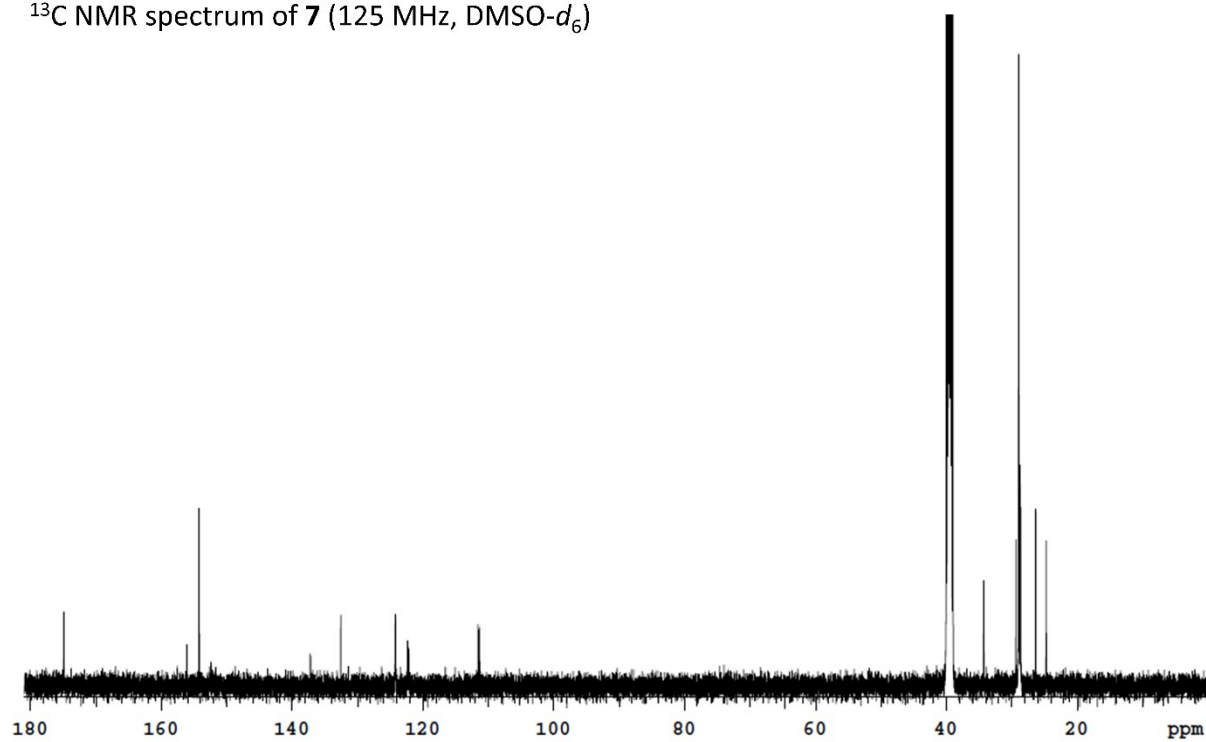



$^1\text{H}$  NMR spectrum of **9** (500 MHz,  $\text{DMSO-}d_6$ )

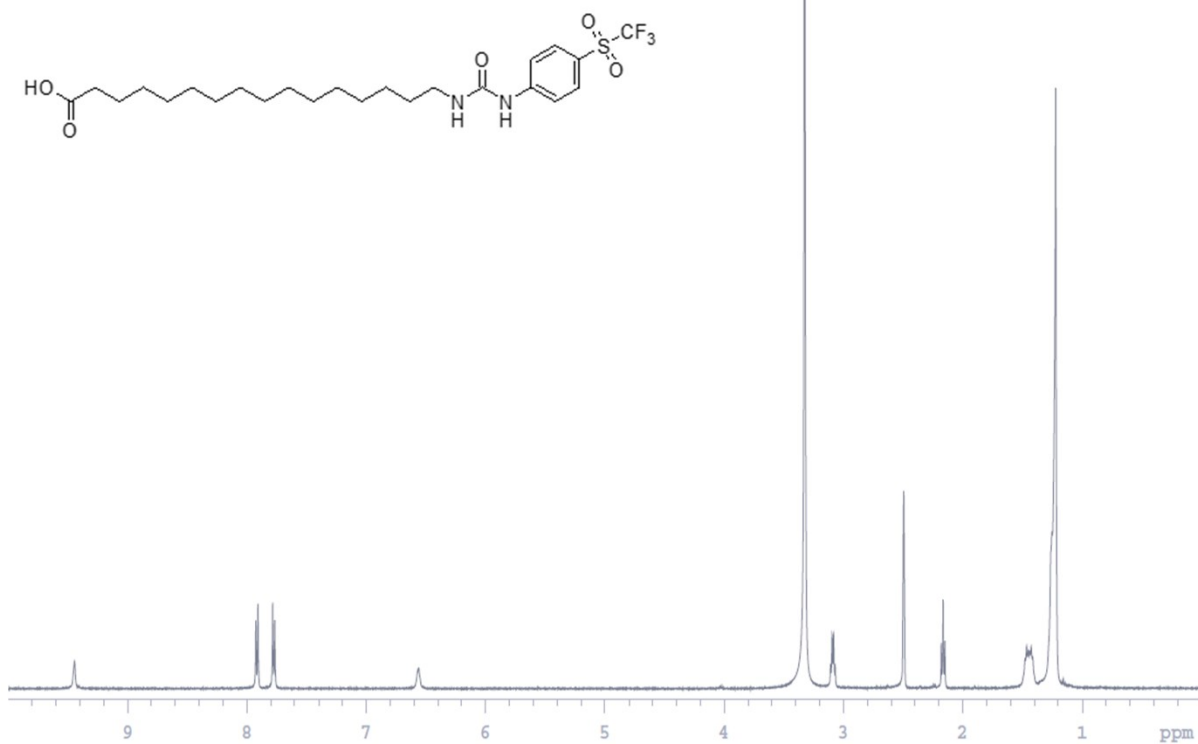

$^{13}\text{C}$  NMR spectrum of **9** (125 MHz,  $\text{DMSO-}d_6$ )

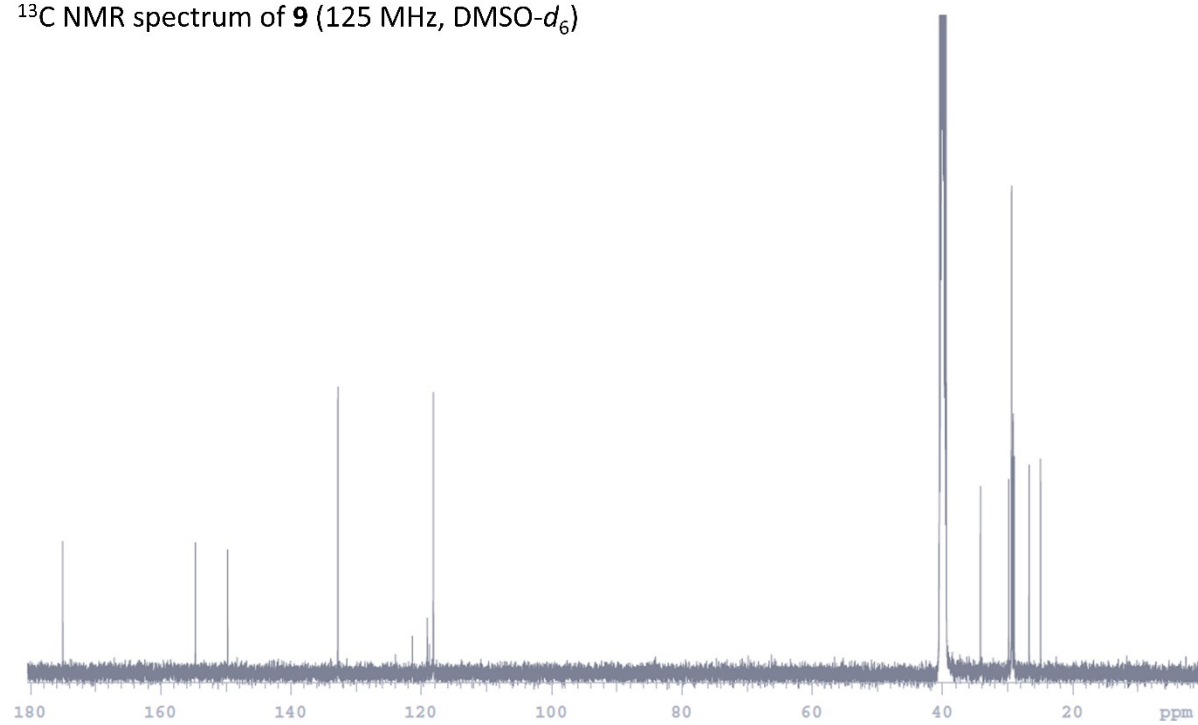

$^1\text{H}$  NMR spectrum of **10** (500 MHz,  $\text{DMSO-}d_6$ )

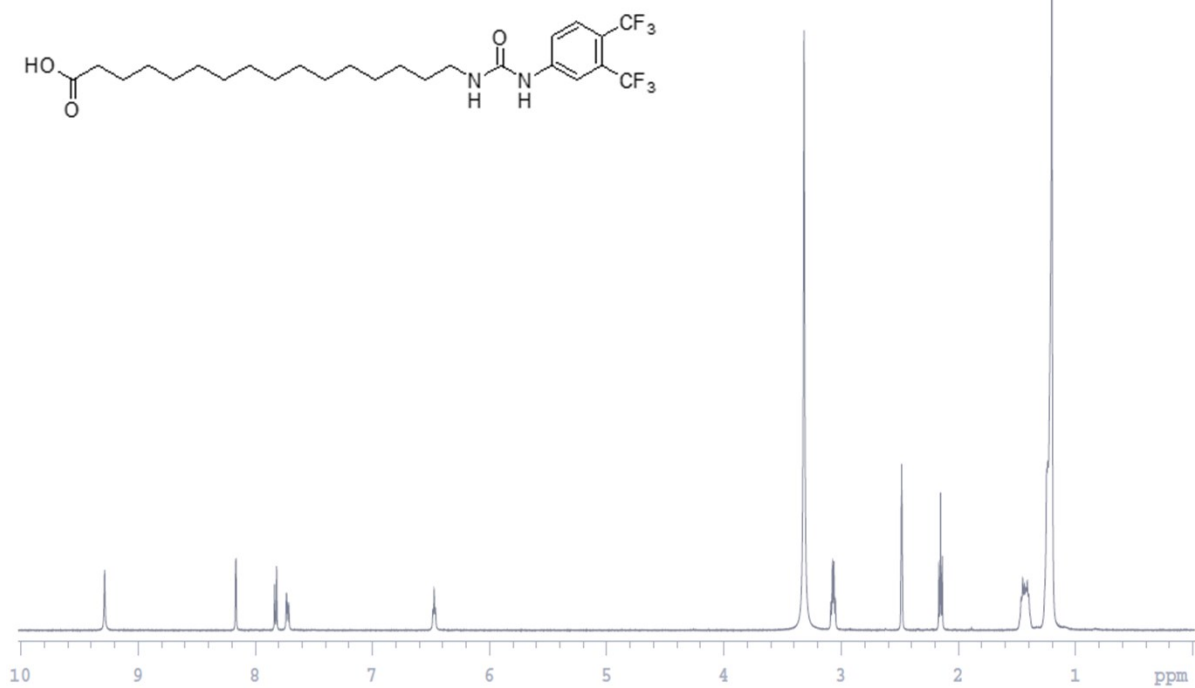

$^{13}\text{C}$  NMR spectrum of **10** (125 MHz,  $\text{DMSO-}d_6$ )

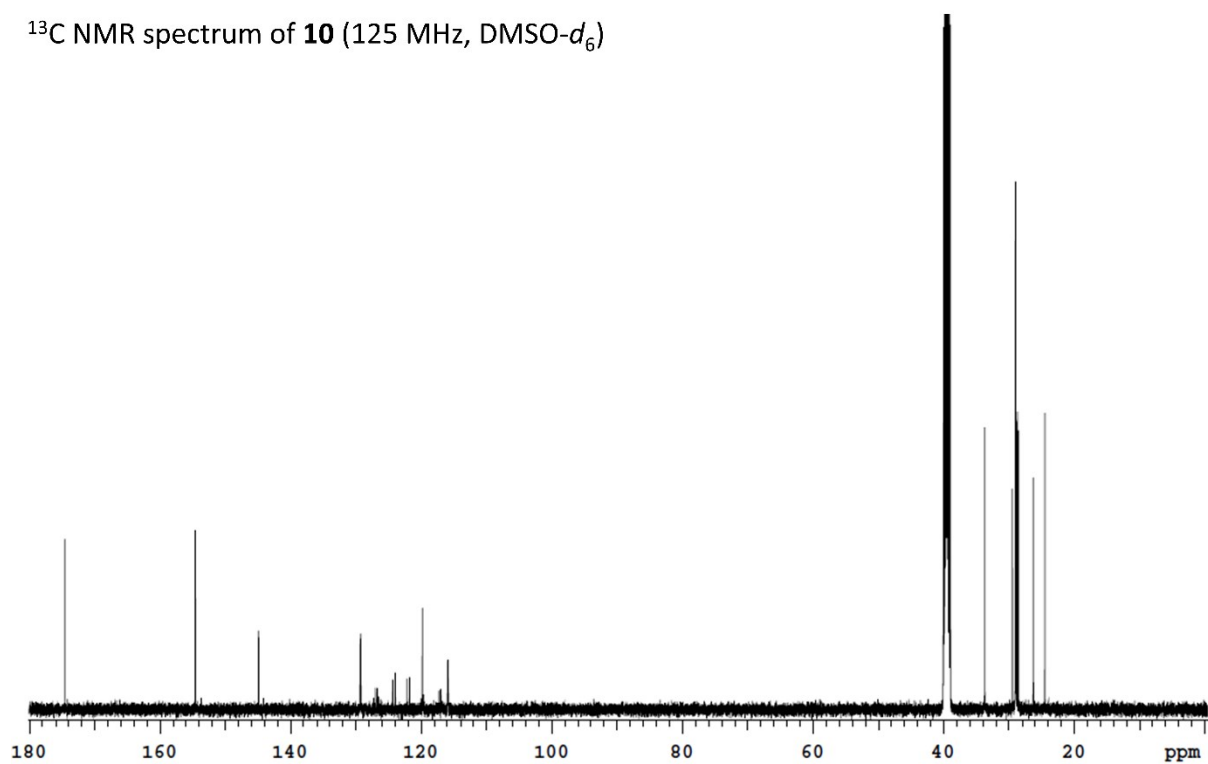

$^1\text{H}$  NMR spectrum of **13** (500 MHz,  $\text{DMSO}-d_6$ )

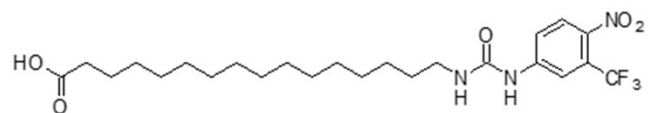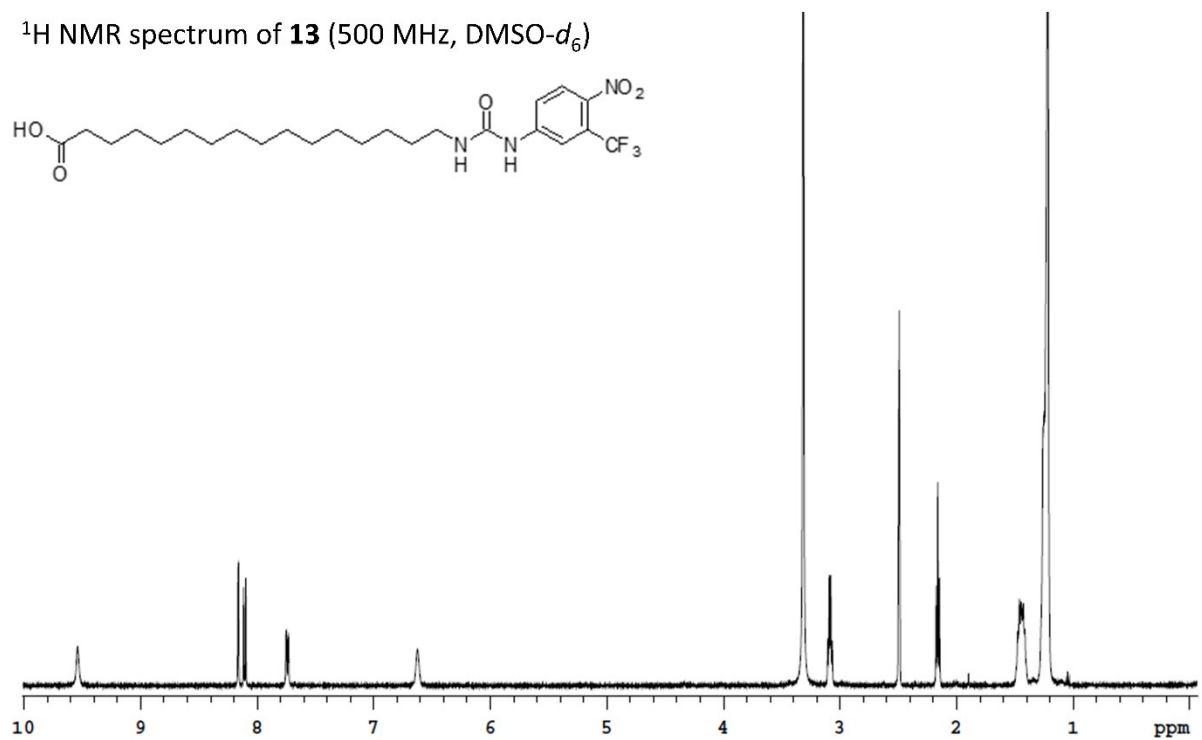

$^{13}\text{C}$  NMR spectrum of **13** (125 MHz,  $\text{DMSO}-d_6$ )

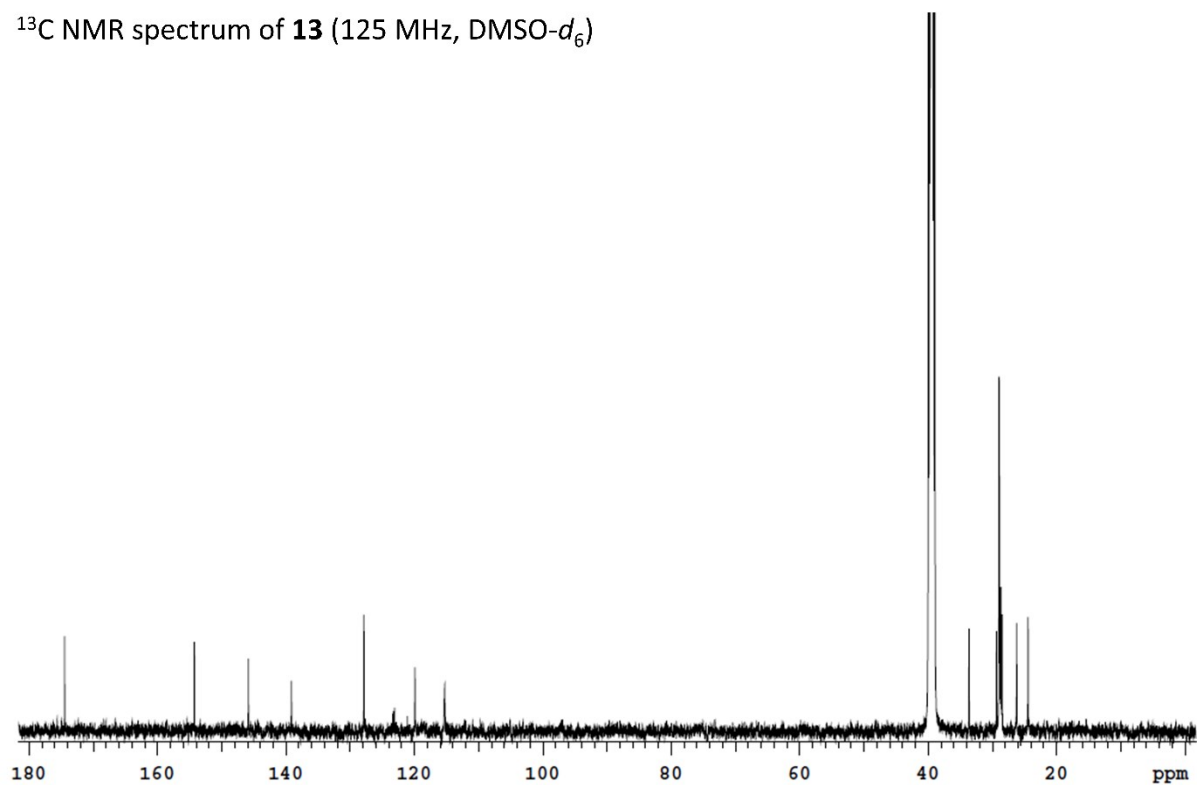

## 9. References

- [1] Cranfield, C.; Carne, S.; Martinac, B.; Cornell, B., The Assembly and Use of Tethered Bilayer Lipid Membranes (tBLMs). *Methods Mol. Biol.* 2015, 1232, 45-53.
- [2] Cranfield, C. G.; Bettler, T.; Cornell, B., Nanoscale Ion Sequestration To Determine the Polarity Selectivity of Ion Conductance in Carriers and Channels. *Langmuir* 2015, 31, 292-298.
- [3] Cranfield, C. G.; Henriques, S. T.; Martinac, B.; Duckworth, P.; Craik, D. J.; Cornell, B., Kalata B1 and Kalata B2 Have a Surfactant-Like Activity in Phosphatidylethanolamine-Containing Lipid Membranes. *Langmuir* 2017, 33, 6630-6637.
- [4] Rawling, T.; Choucair, H.; Koolaji, N.; Bourget, K.; Allison, S. E.; Chen, Y.-J.; Dunstan, C. R.; Murray, M., A Novel Arylurea Fatty Acid That Targets the Mitochondrion and Depletes Cardiolipin To Promote Killing of Breast Cancer Cells. *J. Med. Chem.* 2017, 60, 8661-8666.
- [5] Al-Zubaidi, Y.; Pazderka, C.; Koolaji, N.; Rahman, M. K.; Choucair, H.; Umashankar, B.; Bourget, K.; Chen, Y.; Rawling, T.; Murray, M., Aryl-urea fatty acids that activate the p38 MAP kinase and down-regulate multiple cyclins decrease the viability of MDA-MB-231 breast cancer cells. *Eur. J. Pharm. Sci.* 2019, 129, 87-98.
- [6] Bourhis, L. J.; Dolomanov, O. V.; Gildea, R. J.; Howard, J. A. K.; Puschmann, H.; *Acta Crystallogr. A* 2015, 71, 59-75.
- [7] Dolomanov, O. V.; Bourhis, L. J.; Gildea, R. J.; Howard, J. A. K.; Puschmann, H.; *J. Appl. Crystallogr.* 2009, 42, 339-341.
- [8] Sheldrick, G., *Acta Crystallogr. C* 2015, 71, 3-8.
- [9] Curtiss, L. A.; Redfern, P. C.; Raghavachari, K. Gaussian-4 Theory Using Reduced Order Perturbation Theory. *J. Chem. Phys.* 2007, 127, 4703-4709.
- [10] Curtiss, L. A.; Raghavachari, K.; Redfern, P. C.; Baboul, A. G.; Pople, J. A. Gaussian-3 Theory Using Coupled Cluster Energies. *Chem. Phys. Lett.* 1999, 314, 101-107.
- [11] Zhao, Y.; Truhlar, D. G. The M06 Suite of Density Functionals for Main Group Thermochemistry, Thermochemical Kinetics, Noncovalent Interactions, Excited States, and Transition Elements: Two New Functionals and Systematic Testing of Four M06-Class Functionals and 12 Other Function. *Theor. Chem. Acc.* 2008, 120, 215-241.

- [12] Hehre, W. J.; Ditchfield, K.; Pople, J. A. Self-Consistent Molecular Orbital Methods. XII. Further Extensions of Gaussian-Type Basis Sets for Use in Molecular Orbital Studies of Organic Molecules. *J. Chem. Phys.* 1972, 56, 2257–2261.
- [13] Dill, J. D.; Pople, J. A. Self-Consistent Molecular Orbital Methods. XV. Extended Gaussian-Type Basis Sets for Lithium, Beryllium, and Boron. *J. Chem. Phys.* 1975, 62, 2921–2923.
- [14] Clark, T.; Chandrasekhar, J.; Spitznagel, G. W.; Schleyer, P. V. R. Efficient Diffuse Function-augmented Basis Sets for Anion Calculations. III. The 3-21+G Basis Set for First-row Elements, Li–F. *J. Comput. Chem.* 1983, 4, 294–301.
- [15] Frisch, M. J.; Pople, J. A.; Binkley, J. S. Self-Consistent Molecular Orbital Methods 25. Supplementary Functions for Gaussian Basis Sets. *J. Chem. Phys.* 1984, 80, 3265–3269.
- [16] Francl, M. M.; Pietro, W. J.; Hehre, W. J.; Binkley, J. S.; Gordon, M. S.; DeFrees, D. J.; Pople, J. A. Self-Consistent Molecular Orbital Methods. XXIII. A Polarization-Type Basis Set for Second-Row Elements. *J. Chem. Phys.* 1982, 77, 3654–3665.
- [17] Ho, J.; Coote, M. L. A Universal Approach for Continuum Solvent PKa Calculations: Are We There Yet? *Theor. Chem. Acc.* 2009, 125, 3–21.
- [18] Ho, J.; Coote, M. L. PKa Calculation of Some Biologically Important Carbon Acids - An Assessment of Contemporary Theoretical Procedures. *J. Chem. Theory Comput.* 2009, 5, 295–306.
- [19] Frisch, M. J. et al. Gaussian 09, Revision E.01. Gaussian Inc. 2009.
- [20] Shao, Y.; Gan, Z.; Epifanovsky, E.; Gilbert, A. T. B.; Wormit, M.; Kussmann, J.; Lange, A. W.; Behn, A.; Deng, J.; Feng, X.; et al. Advances in Molecular Quantum Chemistry Contained in the Q-Chem 4 Program Package. *Mol. Phys.* 2015, 113, 184–215.
- [21] Kaliman, I. A.; Krylov, A. I. New Algorithm for Tensor Contractions on Multi-Core CPUs, GPUs, and Accelerators Enables CCSD and EOM-CCSD Calculations with over 1000 Basis Functions on a Single Compute Node. *J. Comput. Chem.* 2017, 38, 842–853.
- [22] PW, A. *Physical Chemistry*, 6th Edn., 6th ed.; Oxford University Press: Oxford, 1998.
- [23] Alecu, I. M.; Zheng, J.; Zhao, Y.; Truhlar, D. G. Computational Thermochemistry: Scale Factor Databases and Scale Factors for Vibrational Frequencies Obtained from Electronic Model Chemistries. *J. Chem. Theory Comput.* 2010, 6, 2872–2887.

- [24] Marenich, A. V.; Cramer, C. J.; Truhlar, D. G. Universal Solvation Model Based on Solute Electron Density and on a Continuum Model of the Solvent Defined by the Bulk Dielectric Constant and Atomic Surface Tensions. *J. Phys. Chem. B* 2009, 113, 6378–6396.
- [25] Ho, J.; Klamt, A.; Coote, M. L. Comment on the Correct Use of Continuum Solvent Models. *J. Phys. Chem. A* 2010, 114, 13442–13444.
- [26] Loftsson, T.; Össurardóttir, Í. B.; Thorsteinsson, T.; Duan, M.; Másson, M. Cyclodextrin Solubilization of the Antibacterial Agents Triclosan and Triclocarban: Effect of Ionization and Polymers. *J. Incl. Phenom.* 2005, 52, 109–117.
- [27] Kupai, J.; Kisszékelyi, P.; Rojik, E.; Dargó, G.; Hegedus, L.; Bezzegh, D.; Maszler, P.; Szabó, L.; Németh, T.; Balogh, G. T.; et al. Synthesis and Determination of PKa Values of New Enantiopure Pyridino- and Piperidino-18-Crown-6 Ethers. 2016, 130–151.
- [28] Boys, S. F.; Bernardi, F. The Calculation of Small Molecular Interactions by the Differences of Separate Total Energies. Some Procedures with Reduced Errors. *Mol. Phys.* 1970, 19, 553–566.
- [29] Simon, S.; Duran, M.; Dannenberg, J. J. How Does Basis Set Superposition Error Change the Potential Surfaces for Hydrogen-Bonded Dimers. *J. Chem. Phys.* 1996, 105, 11024–11031.
- [30] Horvath, S. E.; Daum, G. Lipids of Mitochondria. *Prog. Lipid Res.* 2013, 52, 590–614.
- [31] Poger, D.; Van Gunsteren, W. F.; Mark, A. E. A New Force Field for Simulating Phosphatidylcholine Bilayers. *J. Comput. Chem.* 2010, 31, 1117–1125.
- [32] Poger, D.; Mark, A. E. On the Validation of Molecular Dynamics Simulations of Saturated and Cis-Monounsaturated Phosphatidylcholine Lipid Bilayers: A Comparison with Experiment. *J. Chem. Theory Comput.* 2010, 6, 325–336.
- [33] Malde, A. K.; Zuo, L.; Breeze, M.; Stroet, M.; Poger, D.; Nair, P. C.; Oostenbrink, C.; Mark, A. E. An Automated Force Field Topology Builder (ATB) and Repository: Version 1.0. *J. Chem. Theory Comput.* 2011, 7, 4026–4037.
- [34] Van Der Spoel, D.; Lindahl, E.; Hess, B.; Groenhof, G.; Mark, A. E.; Berendsen, H. J. C. GROMACS: Fast, Flexible, and Free. *J. Comput. Chem.* 2005, 26, 1701–1718.
- [35] Berendsen, H. J. C.; van der Spoel, D.; van Drunen, R. GROMACS: A Message-Passing Parallel Molecular Dynamics Implementation. *Comput. Phys. Commun.* 1995, 91, 43–56.

- [36] Abraham, M. J.; Murtola, T.; Schulz, R.; Páll, S.; Smith, J. C.; Hess, B.; Lindah, E. Gromacs: High Performance Molecular Simulations through Multi-Level Parallelism from Laptops to Supercomputers. *SoftwareX* 2015, 1–2, 19–25.
- [37] Bussi, G.; Donadio, D.; Parrinello, M. Canonical Sampling through Velocity Rescaling. *J. Chem. Phys.* 2007, 126, 14101.
- [38] Berendsen, H. J. C.; Postma, J. P. M.; Van Gunsteren, W. F.; Dinola, A.; Haak, J. R. Molecular Dynamics with Coupling to an External Bath. *J. Chem. Phys.* 1984, 81, 3684–3690.
- [39] Parrinello, M.; Rahman, A. Polymorphic Transitions in Single Crystals: A New Molecular Dynamics Method. *J. Appl. Phys.* 1981, 52, 7182–7190.
- [40] Hess, B.; Bekker, H.; Berendsen, H. J. C.; Fraaije, J. G. E. M. LINCS: A Linear Constraint Solver for Molecular Simulations. *J. Comput. Chem.* 1997, 18, 1463–1472.
- [41] Essmann, U.; Perera, L.; Berkowitz, M. L.; Darden, T.; Lee, H.; Pedersen, L. G. A Smooth Particle Mesh Ewald Method. *J. Chem. Phys.* 1995, 103, 8577–8593.
- [42] Humphrey, W.; Dalke, A.; Schulten, K. VMD: Visual Molecular Dynamics. *J. Mol. Graph.* 1996, 14, 33–38.
- [43] McGibbon, R. T.; Beauchamp, K. A.; Harrigan, M. P.; Klein, C.; Swails, J. M.; Hernández, C. X.; Schwantes, C. R.; Wang, L. P.; Lane, T. J.; Pande, V. S. MDTraj: A Modern Open Library for the Analysis of Molecular Dynamics Trajectories. *Biophys. J.* 2015, 109, 1528–1532.
- [44] Chen, Z.; Lohr, A.; Saha-Moller, C. R.; Wurthner, F. Self-assembled pi-stacks of functional dyes in solution: structural and thermodynamic features. *Chem. Soc. Rev.* 2009, 38, 564-584.
- [45] Kato, H.; Saito, T.; Nabeshima, M.; Shimada, K.; Kinugasa, S. J. Assessment of diffusion coefficients of general solvents by PFG-NMR: investigation of the sources error. *Magn. Reson.* 2006, 180, 266-273.

## 10.Quantum Chemistry Data

**Table S3. G3(MP2)CC(+) pKa calculations**

Unless otherwise noted, all units are in Hartree

| Species   | S<br>(J/mol K) | TC<br>(kJ/mol) | ZPVE<br>(kJ/mol) | RM06-2X/<br>6-31+G(d) | RM06-2X/<br>6-31+G(d)<br>SMD | RMP2/<br>6-31+G(d) | RMP2/<br>GTMP2L | RCCSD(T)/<br>6-31+G(d) | G3(MP2)<br>CC(+) | $\Delta G_{\text{solv}}$<br>(water) | $G_{\text{soln}}$<br>(water) |
|-----------|----------------|----------------|------------------|-----------------------|------------------------------|--------------------|-----------------|------------------------|------------------|-------------------------------------|------------------------------|
| 1         | 615.3144       | 51.3165        | 574.5681         | -1370.53293           | -1370.552902                 | -1367.74362        | -1368.786984    | -1367.925299           | -1368.968663     | -0.0199718                          | -1368.869689                 |
| 1_Anion   | 606.2881       | 49.8935        | 539.857          | -1369.994447          | -1370.073169                 | -1367.208385       | -1368.244312    | -1367.385925           | -1368.421852     | -0.07872127                         | -1368.394853                 |
| 2         | 623.1395       | 53.6822        | 607.1102         | -1470.53108           | -1470.550228                 | -1467.487194       | -1468.7471      | -1467.664085           | -1468.923991     | -0.01914863                         | -1468.762221                 |
| 2_Anion   | 617.3279       | 52.5372        | 571.4207         | -1469.995408          | -1470.071728                 | -1466.954603       | -1468.204039    | -1467.127813           | -1468.37725      | -0.07632044                         | -1468.28602                  |
| 3         | 569.5849       | 45.2255        | 593.6588         | -778.4465485          | -778.4707003                 | -776.4554898       | -777.2651047    | -776.6188365           | -777.4284514     | -0.024151819                        | -777.2739467                 |
| 3_Anion   | 557.3928       | 43.7532        | 558.8179         | -777.9071289          | -777.9914678                 | -775.918748        | -776.721367     | -776.077736            | -776.880355      | -0.084338942                        | -776.7984839                 |
| 4         | 610.8752       | 51.5753        | 683.9726         | -1161.800096          | -1161.838368                 | -1159.282955       | -1160.222611    | -1159.469902           | -1160.409558     | -0.03827191                         | -1160.237045                 |
| 4_Anion   | 602.9291       | 50.1146        | 649.5807         | -1161.263341          | -1161.359823                 | -1158.747797       | -1159.681141    | -1158.93132            | -1159.864664     | -0.0964815                          | -1159.763114                 |
| 5         | 560.7009       | 45.0902        | 594.2082         | -778.4499459          | -778.4742615                 | -776.4564581       | -777.2663925    | -776.6208069           | -777.4307413     | -0.0243156                          | -777.2752338                 |
| 5_Anion   | 543.9791       | 43.2751        | 560.0956         | -777.9200994          | -777.9997638                 | -775.9278647       | -776.7302199    | -776.0885366           | -776.8908918     | -0.079664421                        | -776.8025184                 |
| 6         | 631.1736       | 51.6668        | 574.1954         | -1370.537252          | -1370.556221                 | -1367.747506       | -1368.791046    | -1367.929202           | -1368.972742     | -0.018969                           | -1368.825008                 |
| 6_Anion   | 619.0641       | 50.1385        | 539.5163         | -1370.000659          | -1370.078063                 | -1367.214187       | -1368.250126    | -1367.391637           | -1368.427576     | -0.077404                           | -1368.350693                 |
| 7         | 579.5895       | 47.1046        | 573.5415         | -877.6632646          | -877.6784303                 | -875.4835236       | -876.3927008    | -875.6485735           | -876.5577507     | -0.015165664                        | -876.4023426                 |
| 7_Anion   | 573.7579       | 46.132         | 538.0044         | -877.1208194          | -877.2034746                 | -874.9462513       | -875.8449342    | -875.1082666           | -876.0069495     | -0.082655196                        | -875.9322745                 |
| 8         | 609.8229       | 51.1704        | 574.886          | -1370.534934          | -1370.554551                 | -1367.74505        | -1368.788336    | -1367.927007           | -1368.970294     | -0.01961694                         | -1368.82071                  |
| 8_Anion   | 609.5418       | 49.9391        | 539.7257         | -1369.999556          | -1370.076983                 | -1367.212596       | -1368.247918    | -1367.390737           | -1368.426059     | -0.07742699                         | -1368.348114                 |
| 9         | 662.2908       | 57.2287        | 625.6368         | -1459.435642          | -1459.463076                 | -1456.368086       | -1457.602548    | -1456.557237           | -1457.791699     | -0.02743367                         | -1457.634252                 |
| 9_Anion   | 646.0618       | 55.5194        | 591.6146         | -1458.910472          | -1458.988285                 | -1455.844455       | -1457.072263    | -1456.030489           | -1457.258298     | -0.0778128                          | -1457.634252                 |
| 10        | 658.7141       | 57.2782        | 612.3808         | -1247.917843          | -1247.937026                 | -1244.987608       | -1246.292858    | -1245.176862           | -1246.482113     | -0.01918249                         | -1246.321039                 |
| 10_Anion  | 646.3597       | 55.7799        | 577.525          | -1247.386108          | -1247.459921                 | -1244.459394       | -1245.755975    | -1244.644616           | -1245.941197     | -0.07381305                         | -1245.847197                 |
| 11        | 655.8584       | 57.2342        | 581.8994         | -1930.09628           | -1930.114621                 | -1926.518304       | -1927.860578    | -1926.704765           | -1928.047039     | -0.01834093                         | -1927.896426                 |
| 11_Anion  | 649.0203       | 56.0506        | 546.3669         | -1929.566076          | -1929.638511                 | -1925.991443       | -1927.323594    | -1926.173448           | -1927.505599     | -0.07243483                         | -1927.422287                 |
| 12        | 648.4863       | 54.3254        | 550.3939         | -1830.100785          | -1830.117557                 | -1826.780498       | -1827.9034      | -1826.97211            | -1828.095012     | -0.016772                           | -1827.9551                   |
| 12_Anion  | 640.4742       | 53.4147        | 515.1865         | -1829.564345          | -1829.645898                 | -1826.245421       | -1827.362389    | -1826.433298           | -1828.095012     | -0.081553                           | -1827.487982                 |
| 13        | 635.7661       | 54.5804        | 606.8602         | -1115.391566          | -1115.416102                 | -1112.725617       | -1113.878334    | -1112.906452           | -1114.059169     | -0.02453583                         | -1113.903972                 |
| 13_Anion  | 623.4394       | 52.7356        | 572.9406         | -1114.871496          | -1114.944651                 | -1112.205525       | -1113.350247    | -1112.383024           | -1113.527746     | -0.07315462                         | -1113.43339                  |
| DPU       | 517.1455       | 39.3047        | 576.7359         | -687.0717424          | -687.0920097                 | -685.2422428       | -685.9359181    | -685.4105805           | -686.1042558     | -0.0202673                          | -685.9486123                 |
| DPU_Anion | 497.9421       | 37.7225        | 540.391          | -686.5491241          | -686.6350162                 | -684.7014613       | -685.3890619    | -684.8653722           | -686.1042558     | -0.0858921                          | -685.4752191                 |
| TCC       | 613.3873       | 49.2944        | 502.1753         | -2065.797791          | -2065.82034                  | -2062.339685       | -2063.279289    | -2062.538943           | -2063.478547     | -0.02254886                         | -2063.360708                 |
| TCC_Anion | 592.0961       | 47.9402        | 467.7675         | -2065.274434          | -2065.345463                 | -2061.817512       | -2062.751501    | -2062.012406           | -2062.946395     | -0.07102919                         | -2062.88824                  |



**Table S4. Calculation of Propanoate Binding and Lipophilicity Metrics**

Unless otherwise noted, all units are in Hartree. If complexed to propanoate the tabulated values in the RM06-2X/6-31+G(d) (BSSE) column are BSSE corrected. For isolated compounds this column corresponds directly to the RM06-2X/6-31+G(d) energy.

| Species       | S<br>(J/mol K) | TC<br>(kJ/mol) | ZPVE<br>(kJ/mol) | RM06-2X/<br>6-31+G(d)<br>(BSSE) | RM06-2X/<br>6-31+G(d)<br>SMD<br>H <sub>2</sub> O | RM06-2X/<br>6-31+G(d)<br>SMD<br>n-pentadecane | $\Delta G_{\text{sol}}^{\text{w}}$<br>(water) | $\Delta G_{\text{sol}}^{\text{n-pentadecane}}$<br>(n-pentadecane) | $G_{\text{sol}}^{\text{w}}$<br>(water) | $G_{\text{sol}}^{\text{n-pentadecane}}$<br>(pentadecane) |
|---------------|----------------|----------------|------------------|---------------------------------|--------------------------------------------------|-----------------------------------------------|-----------------------------------------------|-------------------------------------------------------------------|----------------------------------------|----------------------------------------------------------|
| Propanoate    | 318.92         | 17.3706        | 197.0105         | -267.7291889                    | -267.8436842                                     | -267.7772298                                  | -0.1114764                                    | -0.045022                                                         | -267.7952283                           | -267.7287739                                             |
| 1             | 615.3144       | 51.3165        | 574.5681         | -1370.53293                     | -1370.552902                                     | -1370.549327                                  | -0.0199718                                    | -0.016397                                                         | -1370.381371                           | -1370.377796                                             |
| 1_Propanoate  | 782.3849       | 69.5042        | 777.188          | -1638.338392                    | -1638.411338                                     | -1638.380308                                  | -0.0699276                                    | -0.0388973                                                        | -1638.174678                           | -1638.143648                                             |
| 2             | 623.1395       | 53.6822        | 607.1102         | -1470.53108                     | -1470.550228                                     | -1470.54628                                   | -0.0191486                                    | -0.0152005                                                        | -1470.36629                            | -1470.362342                                             |
| 2_Propanoate  | 788.8887       | 71.9168        | 809.0003         | -1738.337698                    | -1738.408755                                     | -1738.377894                                  | -0.0680379                                    | -0.0371776                                                        | -1738.159798                           | -1738.128938                                             |
| 3             | 569.5849       | 45.2255        | 593.6588         | -778.4465485                    | -778.4707003                                     | -778.4653178                                  | -0.0241518                                    | -0.0187693                                                        | -778.289025                            | -778.2836426                                             |
| 3_Propanoate  | 737.1348       | 63.4003        | 796.1931         | -1046.251802                    | -1046.329149                                     | -1046.296126                                  | -0.0743279                                    | -0.0413056                                                        | -1046.082437                           | -1046.049414                                             |
| 4             | 610.8752       | 51.5753        | 683.9726         | -1161.800096                    | -1161.838368                                     | -1161.821218                                  | -0.0382719                                    | -0.0211217                                                        | -1161.624564                           | -1161.607414                                             |
| 4_Propanoate  | 778.5165       | 69.6409        | 886.7418         | -1429.605579                    | -1429.696835                                     | -1429.65171                                   | -0.0882374                                    | -0.0431117                                                        | -1429.417957                           | -1429.372832                                             |
| 5             | 560.7009       | 45.0902        | 594.2082         | -778.4499459                    | -778.4742615                                     | -778.4688472                                  | -0.0243156                                    | -0.0189013                                                        | -778.2914196                           | -778.2860053                                             |
| 5_Propanoate  | 717.1386       | 62.5499        | 797.4688         | -1046.259195                    | -1046.333389                                     | -1046.302573                                  | -0.0711747                                    | -0.0403588                                                        | -1046.084244                           | -1046.053428                                             |
| 6             | 631.1736       | 51.6668        | 574.1954         | -1370.537252                    | -1370.556221                                     | -1370.553427                                  | -0.0189685                                    | -0.0161745                                                        | -1370.386499                           | -1370.383705                                             |
| 6_Propanoate  | 790.6445       | 69.7335        | 776.4501         | -1638.342739                    | -1638.414847                                     | -1638.384199                                  | -0.0690896                                    | -0.0384413                                                        | -1638.179319                           | -1638.148671                                             |
| 7             | 579.5895       | 47.1046        | 573.5415         | -877.6632646                    | -877.6784303                                     | -877.6701264                                  | -0.0151657                                    | -0.0068618                                                        | -877.5048377                           | -877.4965338                                             |
| 7_Propanoate  | 732.955        | 64.9937        | 775.4275         | -1145.454522                    | -1145.537408                                     | -1145.499117                                  | -0.0798675                                    | -0.0415761                                                        | -1145.297524                           | -1145.259232                                             |
| 8             | 609.8229       | 51.1704        | 574.886          | -1370.534934                    | -1370.554551                                     | -1370.551301                                  | -0.0196169                                    | -0.0163669                                                        | -1370.382331                           | -1370.379081                                             |
| 8_Propanoate  | 777.6691       | 69.3816        | 776.9903         | -1638.341614                    | -1638.413309                                     | -1638.383266                                  | -0.0686768                                    | -0.0386334                                                        | -1638.176236                           | -1638.146193                                             |
| 9             | 662.2908       | 57.2287        | 625.6368         | -1459.435642                    | -1459.463076                                     | -1459.453273                                  | -0.0274337                                    | -0.0176312                                                        | -1459.275176                           | -1459.265374                                             |
| 9_Propanoate  | 826.7351       | 75.2772        | 828.0718         | -1727.247043                    | -1727.322222                                     | -1727.287876                                  | -0.0721607                                    | -0.0378144                                                        | -1727.069019                           | -1727.069019                                             |
| 10            | 658.7141       | 57.2782        | 612.3808         | -1247.917843                    | -1247.937026                                     | -1247.932808                                  | -0.0191825                                    | -0.0149648                                                        | -1247.753751                           | -1247.749533                                             |
| 10_Propanoate | 821.8673       | 75.4018        | 814.5097         | -1515.727052                    | -1515.795897                                     | -1515.766247                                  | -0.065826                                     | -0.036176                                                         | -1515.547259                           | -1515.517609                                             |
| 11            | 655.8584       | 57.2342        | 581.8994         | -1930.09628                     | -1930.114621                                     | -1930.111759                                  | -0.0183409                                    | -0.0154791                                                        | -1929.942648                           | -1929.939786                                             |
| 11_Propanoate | 813.1511       | 74.9624        | 784.4002         | -2197.906486                    | -2197.97368                                      | -2197.945167                                  | -0.0641757                                    | -0.0356629                                                        | -2197.735688                           | -2197.707176                                             |
| 12            | 648.4863       | 54.3254        | 550.3939         | -1830.100785                    | -1830.117557                                     | -1830.115812                                  | -0.0167714                                    | -0.0150265                                                        | -1829.957854                           | -1829.956109                                             |
| 12_Propanoate | 818.4732       | 73.0388        | 750.0251         | -2097.894541                    | -2097.976295                                     | -2097.938445                                  | -0.0787351                                    | -0.0408859                                                        | -2097.752733                           | -2097.714883                                             |
| 13            | 635.7661       | 54.5804        | 606.8602         | -1115.391566                    | -1115.416102                                     | -1115.409889                                  | -0.0245358                                    | -0.0183232                                                        | -1115.233351                           | -1115.227138                                             |
| 13_Propanoate | 812.7423       | 72.6425        | 809.0761         | -1383.206184                    | -1383.275541                                     | -1383.246982                                  | -0.0663389                                    | -0.0377801                                                        | -1383.028988                           | -1383.000429                                             |

# Gaussian Archive Files

## 1\_anion\_water.M062X\_6-31pGd\_opt\_water

```
I\GINC-R3758\FOpt\RM062X\Gen\C11H11Cl1F3N2O1(1-)\ROOT\27-Feb-2019\0\
# M062X/Gen 6D SCF=Tight INT(grid=ultrafine) OPT=CalcFC IOP(2/17=4) S
CRF=(SMD,Solvent=h2o) maxdisk=2147483648\3TFM4Chloro_a1.M062X_6-31pGd
_opt_water\1,1,C,-1.825508665,2.2883066773,-0.2427234921\C,-0.500556
7908,1.5418183757,-0.1208611822\C,0.6616239374,2.4998501546,0.09804907
45\N,1.9185364151,1.7685829129,0.1936633513\C,3.1174304402,2.468548545
8,0.2831950309\O,3.0732346003,3.6645387003,0.6999285861\N,4.198913701,
1.7381928273,-0.0201964044\C,5.4440129495,2.3278394685,-0.0649227622\C
,5.7062533214,3.6695888682,-0.4305920072\C,6.5728040294,1.5154624603,
.1808010863\C,7.8703640125,2.0012983439,0.0937413882\C,8.0967509468,3.
328829874,-0.2539437478\C,7.0060623989,4.1604883678,-0.5224902908\H,-2
.657698884,1.594703564,-0.3973144513\H,-1.8068191841,2.9849388411,-1.0
883732354\H,-2.0335804716,2.8667990333,0.6644260658\H,-0.3188667578,0.
9559428974,-1.031483443\H,-0.5452630469,0.8312364289,0.713561269\H,0.5
043595371,3.0620044318,1.0242450943\H,0.6919573187,3.2334756345,-0.722
972,-1.2227713\Quadrupole=-2.225028,-0.0736278,2.2986559,-4.8739967,8.
8423773,1.3598405\PG=C01 [X(C11H11Cl1F3N2O1)]\@
```

## 1\_water.M062X\_6-31pGd\_opt\_water

```
I\GINC-R3741\FOpt\RM062X\Gen\C11H12Cl1F3N2O1\ROOT\27-Feb-2019\0\# M
062X/Gen 6D SCF=Tight INT(grid=ultrafine) OPT=CalcFC IOP(2/17=4) SCRF=
(SMD,Solvent=h2o) maxdisk=2147483648\3TFM4Chloro.M062X_6-31pGd_opt_wa
ter\0,1,C,-1.9242305017,2.0591355712,-0.1305165714\C,-0.5324883817,1.
4949760555,0.1359820335\C,0.5459946396,2.5119576818,-0.2055934555\N,1.
867250505,1.9528576485,0.0528612208\C,2.9871122186,2.6713508328,-0.174
6062174\O,2.9503977216,3.8575858235,-0.5369271189\N,4.1665046975,1.985
1881227,0.0351253059\C,5.4730232011,2.4601588653,-0.1028456508\C,5.800
826279,3.8100603532,-0.2761091453\C,6.5072797756,1.5156366436,-0.03720
65254\C,7.8345175143,1.9019455587,-0.1461813046\C,8.1556526882,3.24319
27918,-0.3267667575\C,7.1362597153,4.1932777432,-0.3907706592\H,-2.698
0224932,1.326787448,0.1178737322\H,-2.0417522701,2.329728065,-1.185593
4516\H,-2.1040509548,2.9572990842,0.4704814881\H,-0.3753888052,0.58786
20479,-0.4606729402\H,-0.4384430857,1.2097006808,1.1908046277\H,0.4149
98265,3.4169651479,0.3979811533\H,0.4682293655,2.8045281316,-1.2600243
298\H,1.936940364,0.9674589784,0.2834534437\H,4.0881512136,0.997888441
1,0.259251221\H,5.0241729836,4.5589739765,-0.3184286614\H,6.2672074753
,0.4647996648,0.100738294\H,8.6229741991,1.1583061295,-0.0941844108\C\
,9.8370630088,3.6893851195,-0.4652875873\C,7.4533683416,5.6529690339,-
0.5788273484\F,6.3487249905,6.4144530967,-0.616690742\F,8.1186091916,
5.8861950739,-1.727513336\F,8.2212181382,6.1405961886,0.415423694\Ver
sion=ES64L-G09RevE.01\State=1-A\HF=-1370.5529019\RMSD=4.075e-09\RMSEF=2
.875e-06\Dipole=-2.0557969,-4.3024863,0.9144214\Quadrupole=0.9241778,6
.0361921,-6.9603699,5.2681364,-2.0183325,-0.0343225\PG=C01 [X(C11H12Cl
1F3N2O1)]\@
```

## 1\_anion.M062X\_6-31pGd\_opt

```
I\GINC-R3782\FOpt\RM062X\Gen\C11H11Cl1F3N2O1(1-)\ROOT\27-Feb-2019\0\
# M062X/Gen 6D SCF=Tight INT(grid=ultrafine) OPT=CalcFC IOP(2/17=4) m
axdisk=2147483648\3TFM4Chloro_a1.M062X_6-31pGd_opt\1,1,C,-1.8852793
652,2.2093507134,-0.0877481401\C,-0.5242298003,1.6991204145,0.38242893
6\C,0.6240899407,2.2893357228,-0.4337909853\N,1.9049205506,1.791334124
9,0.0039180017\C,3.0617872932,2.5856724944,-0.1532610697\O,2.926546832
1,3.8184292203,-0.2594673726\N,4.1760569791,1.8250837293,-0.1417676423
\C,5.4118705819,2.3895999522,-0.2024853322\C,5.7437617792,3.7753823299
,-0.2607135294\C,6.5164516368,1.4956023918,-0.2036298148\C,7.830526128
3,1.9275069077,-0.2573959489\C,8.1221152153,3.2881020863,-0.3122998188
\C,7.0681080649,4.2060198165,-0.3132870741\H,-2.7043512472,1.787825195
7,0.5051468483\H,-2.0619590627,1.9472498006,-1.1378337967\H,-1.9390467
63,3.3013100146,-0.0078562399\H,-0.4969292851,0.6022655971,0.314014494
4\H,-0.3624105984,1.9498911962,1.4373984954\H,0.6565615536,3.376284601
7,-0.3143724769\H,0.4440845503,2.0903434148,-1.5074310015\H,2.09857382
,0.8123139018,-0.1676922062\H,4.9400449726,4.4984362495,-0.2655910144\
H,6.2927575777,0.4333001916,-0.1583615925\H,8.6476481438,1.2112677488,
-0.2560453323\C\,9.8068418799,3.7848295876,-0.3780595038\C,7.346625749
7,5.6821934024,-0.371821707\F,6.2278964044,6.42639195,-0.3680733718\F,
8.0300752398,6.0390026967,-1.4836466569\F,8.086961228,6.1136945469,0.6
752048523\Version=ES64L-G09RevE.01\State=1-A\HF=-1369.9944473\RMSD=7.
565e-09\RMSEF=1.275e-06\Dipole=-0.2250419,-0.4775989,-0.1613016\Quadrup
ole=-15.2876678,4.9112382,10.3764296,-6.6663422,2.0117227,1.7468697\PG
=C01 [X(C11H11Cl1F3N2O1)]\@
```

## 1.M062X\_6-31pGd\_opt

```
I\GINC-R3718\FOpt\RM062X\Gen\C11H12Cl1F3N2O1\ROOT\27-Feb-2019\0\# M
062X/Gen 6D SCF=Tight INT(grid=ultrafine) OPT=CalcFC IOP(2/17=4) maxdi
sk=2147483648\3TFM4Chloro.M062X_6-31pGd_opt\0,1,C,-1.9238118665,2.13.
02060249,-0.0240079758\C,-0.5429143905,1.4923382681,0.1105817285\C,0.7
655679541,2.4874657783,-0.2071689609\N,1.872892206,1.8558202101,-0.051
8067082\C,2.9968520996,2.6475966299,-0.109349224\O,2.9498935416,3.8648
380839,-0.1160847102\N,4.1813751465,1.9201664846,-0.106434271\C,5.4874
750784,2.4263847924,-0.1351449561\C,5.7900361879,3.7720181627,-0.37456
6838\C,6.5364316884,1.5211782723,0.0630119031\C,7.8576652566,1.9411742
67,0.0220745769\C,8.1582485447,3.2777412516,-0.2168317359\C,7.11888143
52,4.189105686,-0.4140953478\H,-2.7147920025,1.4116712985,0.2076565257
\H,-2.0906467037,2.4972241989,-1.0422625423\H,-2.0301418537,2.97921784
72,0.6593440632\H,-0.4700464089,0.630914136,-0.5681065784\H,-0.3978293
366,1.1102735155,1.1279793269\H,0.5371674955,3.3309517059,0.4877451983
\H,0.435628158,2.8992092059,-1.2182088599\H,1.9491634331,0.9130890974,
-0.4341078472\H,4.1077510669,0.9330023215,0.1008931075\H,4.9935104698,
4.4878714164,-0.5198244001\H,6.3194677656,0.4721620893,0.250682255\H,8
.6643388522,1.2326654297,0.1770699552\C\,9.8281376784,3.7588369322,-0.
2597943325\C,7.411075842,5.6480748895,-0.6756822117\F,6.2864576725,6.3
609571409,-0.8354179655\F,8.1431281052,5.8180777815,-1.7895677907\F,8.
0911368843,6.2109870818,0.3366546157\Version=ES64L-G09RevE.01\State=1
-A\HF=-1370.5329301\RMSD=3.506e-09\RMSEF=1.227e-06\Dipole=-1.5885245,-2
.7672284,0.09641\Quadrupole=2.5521173,2.8576786,-5.4097959,2.539066,1.
8461054,-0.1723318\PG=C01 [X(C11H12Cl1F3N2O1)]\@
```

## 2\_anion.M062X\_6-31pGd\_opt\_water

```
I\GINC-R3718\FOpt\RM062X\Gen\C10H12F5N2O1S1(1-)\ROOT\30-Oct-2018\0\
# M062X/Gen 6D SCF=Tight INT(grid=ultrafine) OPT IOP(2/17=4) SCRF=(SMD
,Solvent=h2o) maxdisk=2147483648\4SF5_a1.M062X_6-31pGd_opt_water\1,
1,C,-2.0268012249,1.8787540089,-0.2185201531\C,-0.7159415916,1.4088752
```

293,0.4046916782\O,0.4774806024,2.1485622719,-0.1825040083\N,1.7200155  
253,1.6713418954,0.4112879082\C,2.935743179,2.1482203429,-0.0509026733  
\O,2.9450835986,3.2509480119,-0.6704264789\N,3.9775574955,1.3356565015  
,0.2034071003\C,5.261617383,1.7960884323,0.0778675564\C,5.6810871952,3  
.141666335,0.2569863139\C,6.2827679717,0.8410684409,-0.1644724456\C,7.  
6199446994,1.1896665944,-0.2471212487\C,7.9787568133,2.5272712805,-0.0  
759151587\C,7.0177122451,3.5032894678,0.1832654165\H,-2.881582573,1.34  
80983439,0.2118118591\H,-2.0316750161,1.7035167298,-1.3001633971\H,-2.  
1774285455,2.9512022903,-0.0511407378\H,-0.5906651141,0.3309261644,0.2  
38431793\H,-0.7389020194,1.5652049218,1.4901405885\H,0.377569016,3.22  
1016458,0.0127708026\H,0.490525442,2.0195868401,-1.2755514133\H,1.7314  
596283,0.6847956792,0.647465998\H,4.9468300018,3.9071557262,0.47527255  
73\H,5.9966373634,-0.1991342856,-0.2914274343\H,8.3662529424,0.4263300  
841,-0.4432147827\H,9.7024162485,2.9979491825,-0.1835731546\H,7.300278  
4306,4.5405486642,0.3345350067\H,9.9654304586,2.1233739712,-1.52397445  
53\F,11.2680169096,3.425409947,-0.281574976\F,9.3971170886,4.303219254  
2,-1.0960941042\F,9.6400026545,3.9270820478,1.1445392944\F,10.20791530  
59,1.747409168,0.716776579\Version=ES64L-G09RevE.01\State=1-A\HF=-14  
70.0717283\RMDS=3.220e-09\RMSE=6.504e-06\DPole=0.3967925,-0.9033423,0  
.4574439\Quadrupole=-16.2649275,10.8383299,5.4265976,2.2003942,-2.3293  
845,3.579997\PG=C01 [X(C10H12F5N2O1S1)]\@

## 2\_anion.M062X\_6-31pGd\_opt

1\1\GINC-R4171\FOpt\RM062X\Gen\C10H12F5N2O1S1(-)\ROOT\31-Oct-2018\0\# M0  
62X\Gen 6D SCF=Tight INT(grid=ultrafine) OPT IOP(2/17=4) maxdisk=2  
147483648\4SF5\_a1.M062X\_6-31pGd\_opt\1,1\C,-2.0455909683,2.009040752  
7,0.0349015857\C,-0.7079737747,1.3876257084,0.4327449064\C,0.460222365  
3,1.9957872587,-0.3411346233\N,1.7185585468,1.394651108,0.024163797\C,  
2.9106871921,2.1412092208,-0.035255058\O,2.8402147047,3.3820740099,-0.  
0193123297\N,3.9881486635,1.3221250721,-0.0858549385\C,5.2479329161,1.  
8158794023,-0.0744947826\C,5.6617896202,3.1825629259,0.0140521255\C,6.  
2996901374,0.8519202469,-0.1564557307\C,7.6351878575,1.1958001584,-0.1  
526072102\C,7.9889585574,2.5467090773,-0.0637855209\C,7.0036020186,3.5  
308256758,0.0194170186\H,-2.8790078424,1.572991707,0.5962735987\H,-2.2  
461473632,1.8599815712,-1.0328490611\H,-2.0246351583,0.0892410287,0.22  
14658042\H,-0.7378842093,0.3027357098,0.2583337294\H,-0.522276381,1.52  
64285961,1.5042872537\H,0.5501564564,3.0630070658,-0.118070654\H,0.259  
0913289,1.9105393269,-1.4256329547\H,1.8634150638,0.4256937313,-0.2305  
702342\H,4.9038343157,3.9512123644,0.0752608625\H,6.0054760778,-0.1915  
929979,-0.2223104152\H,8.3996575787,0.4278450145,-0.216586561\N,9.7106  
239383,3.0096585142,-0.0578713028\H,7.2830168601,4.5777808172,0.088212  
4108\F,10.1001702017,2.0126311197,-1.2825013375\F,11.2884899773,3.4299  
819874,-0.0528671122\F,9.507615022,4.2288107502,-1.1126185189\F,9.5441  
65381,4.0639524901,1.1672046466\F,10.1367609154,1.8479905859,0.9975906  
065\Version=ES64L-G09RevE.01\State=1-A\HF=-1469.9954079\RMDS=2.988e-0  
9\RMSE=4.692e-06\DPole=0.2102839,-0.4492842,-0.1815086\Quadrupole=-27  
.5011031,14.329375,13.1717281,-1.9880876,1.75653,1.258722\PG=C01 [X(C1  
0H12F5N2O1S1)]\@

## 2.M062X\_6-31pGd\_opt

1\1\GINC-R3710\FOpt\RM062X\Gen\C10H13F5N2O1S1\ROOT\30-Oct-2018\0\# M0  
62X\Gen 6D SCF=Tight INT(grid=ultrafine) OPT IOP(2/17=4) maxdisk=21474  
83648\4SF5.M062X\_6-31pGd\_opt\0,1\C,-2.0948335042,1.9046393492,0.0044  
342604\C,-0.7387005762,1.2091435064,0.0979128525\C,0.408084306,2.20365  
44755,-0.0249872519\N,1.6878407,1.5158695525,0.0682705488\C,2.85177333  
54,2.220609996,-0.034915754\O,2.8683270034,3.4287793658,-0.2037620392\N,  
3.9992797709,1.4395905567,0.071456147\C,5.3292742418,1.8632288845,0.  
0073631391\C,5.7138230818,3.1993799716,-0.1763848696\C,6.3187306185,0.  
8755412601,0.1376630783\C,7.6646618585,1.201190052,0.0876681324\C,8.02  
66286555,2.5310910273,-0.0950741354\C,7.0652418884,3.5245267145,-0.226  
435952\H,-2.9135377655,1.1853756323,0.0927245266\H,-2.2037356321,2.422  
8325913,-0.953942271\H,-2.2104659744,2.6459935776,0.8018584347\H,-0.65  
27215837,0.4558511302,-0.6962839698\H,-0.6593480367,0.679465311,1.0565  
080968\H,0.3465416167,2.9602827842,0.7662296943\H,0.3549141013,2.73501  
8087,-0.9824559294\H,1.688479682,0.5155120816,0.2084528423\H,3.8730138  
82,0.4459185867,0.2096761318\H,4.9621638561,3.9689113161,-0.2783096187  
\H,6.0301970677,-0.1631051756,0.2802254097\H,8.41731823,0.4275780245,0.  
1898297642\N,9.775366344,2.9694067766,-0.1619778373\H,7.358385244,4.5  
588334301,-0.3686207991\F,10.1215643051,1.7341942428,-1.145352719\F,11  
.3351324769,3.35722828,-0.2211755462\F,9.5624590014,3.9305039196,-1.44  
15318488\F,9.5718424038,4.237262061,0.8165344846\F,10.1310894012,2.040  
9426307,1.1124129979\Version=ES64L-G09RevE.01\State=1-A\HF=-1470.5306  
35\RMDS=4.697e-09\RMSE=3.326e-05\DPole=-2.7126732,-1.98461,0.28297\Qu

adrupole=1.0205306,4.541292,-5.5618225,8.046695,-1.1271033,-1.450379P  
G=C01 [X(C10H13F5N2O1S1)]\@

## 2.M062X\_6-31pGd\_opt\_water

1\1\GINC-R3714\FOpt\RM062X\Gen\C10H13F5N2O1S1\ROOT\30-Oct-2018\0\# M0  
62X\Gen 6D SCF=Tight INT(grid=ultrafine) OPT IOP(2/17=4) SCRF=(SMD,Sol  
vent=h2o) maxdisk=2147483648\4SF5.M062X\_6-31pGd\_opt\_water\0,1\C,-2.0  
874983117,1.8805065948,0.0189597345\C,-0.7268055172,1.1994554923,0.123  
9606135\C,0.4020532443,2.1994084289,-0.0744248406\N,1.6939631322,1.533  
8635482,0.0419683464\C,2.8454377421,2.2197985863,-0.1117044544\O,2.865  
6735446,3.4215918137,-0.415035459\N,3.9911653428,1.4702449884,0.081135  
3734\C,5.3181546514,1.8884149835,0.0080895559\C,5.7197028526,3.2267677  
464,-0.1254226112\C,6.298606783,0.8840322528,0.0974702407\C,7.64687980  
78,1.1957330538,0.050443926\C,8.0189649091,2.5306158907,-0.087238030\N,  
C,7.073177096,3.5440382396,-0.1734955657\H,-2.8985787841,1.1598611384,  
0.1588681164\H,-2.21654674,2.3474651913,-0.9636798573\H,-2.1942821804,  
2.6611738624,0.7801590987\H,-0.64396145,0.4066648505,-0.6293296882\H,0.6  
6203347073,0.7249212149,1.1073636379\H,0.3313821637,3.000836204,0.6  
71352024\H,0.3257821824,2.6630733979,-1.0641110643\H,1.713432322,0.574  
6490841,0.3711392352\H,3.8611701975,0.4774613767,0.2516164683\H,4.9887  
376242,4.0191928392,-0.1873247487\H,5.9950265495,-0.1534685656,0.20523  
86517\H,8.3845311347,0.403440359,0.1195510582\N,9.7671329868,2.9501620  
068,-0.15193494\H,7.3673391676,4.5834012593,-0.2745409286\F,10.1065168  
611,1.7627577044,-1.1979075374\F,11.3421728343,3.3263337872,-0.2101401  
321\F,9.5706537518,3.9785036301,-1.3856027126\F,9.6062986077,4.1798385  
542,0.8874065125\F,10.1428872017,1.9644930696,1.0751799774\Version=ES  
64L-G09RevE.01\State=1-A\HF=-1470.5502283\RMDS=6.128e-09\RMSE=7.732e-0  
6\DPole=-3.3558652,-3.1069071,0.7806074\Quadrupole=-1.3209659,7.06165  
37,-5.7406879,12.5173808,-4.1283499,-1.5860141\PG=C01 [X(C10H13F5N2O1S  
1)]\@

## 4\_anion.M062X\_6-31pGd\_opt

1\1\GINC-R4385\FOpt\RM062X\Gen\C11H15N2O3S1(-)\ROOT\31-Oct-2018\0\# M0  
62X\Gen 6D SCF=Tight INT(grid=ultrafine) OPT IOP(2/17=4) maxdisk=214  
7483648\4SulfOxyMethyl\_a1.M062X\_6-31pGd\_opt\1,1\C,-1.9466282003,1.8  
87911438,-0.0700129613\C,-0.5770083084,1.342544214,-0.4704566581\C,0.5  
517558051,1.9715696828,0.3443715412\N,1.8410836847,1.4414104184,-0.022  
4696655\C,2.9959219593,2.2407054425,0.0695877141\O,2.86804271,3.476379  
7031,0.0886694805\N,4.1102877756,1.4695663839,0.101742533\C,5.34634553  
69,2.0159031433,0.134826174\C,5.6994350044,3.4047977513,0.1527848247\C  
,6.4381847186,1.0904949224,0.1581022174\C,7.7559689783,1.4923411402,0.  
1795824314\C,8.0606988533,2.862985995,0.1926495226\C,7.0243586744,3.80  
53277453,0.1760052874\H,-2.7516378445,1.4376332205,-0.6608231314\H,-1.  
896595089,2.9736684953,-0.2146688242\H,-2.1551574404,1.6882403044,0.9  
878837413\H,-0.3828923379,1.5312099105,-1.5328636577\H,-0.5602682224,0.  
2514729781,-0.3381742098\H,0.3393839024,1.8357896089,1.4214178606\H,  
0.5969425288,3.049426572,0.1630068607\H,2.0290338056,0.4726107804,0.20  
28087326\H,4.9063666503,4.1397824464,0.1521533574\H,6.1829767229,0.034  
4657514,0.1602594887\H,8.563152474,0.7643182705,0.2052979859\N,9.72129  
11872,3.3860642907,0.0764835\O,10.6131261483,2.3199236648,0.5574564107  
\O,9.8602863436,4.7459629521,0.6173371486\H,7.2726276668,4.8642557812,  
0.2008001561\C,10.0394546945,3.5291752095,-1.6878718902\H,9.8871967109  
,2.5513143076,-2.1475694591\H,11.0768571305,3.8547592645,-1.79623575\H  
,9.3529521963,4.2680285255,-2.1044507611\Version=ES64L-G09RevE.01\Sta  
te=1-A\HF=-1161.2633412\RMDS=7.646e-09\RMSE=4.784e-06\DPole=-1.001672  
3,-0.6685656,-1.2566563\Quadrupole=-28.54696,11.587586,16.959374,-3.40  
21616,-13.7689258,-3.8074471\PG=C01 [X(C11H15N2O3S1)]\@

## 4.M062X\_6-31pGd\_opt

1\1\GINC-R3717\FOpt\RM062X\Gen\C11H16N2O3S1\ROOT\30-Oct-2018\0\# M062  
X\Gen 6D SCF=Tight INT(grid=ultrafine) OPT IOP(2/17=4) maxdisk=2147483  
648\4SulfOxyMethyl.M062X\_6-31pGd\_opt\0,1\C,-2.004263388,1.8464310338  
,0.0619611429\C,-0.6364865026,1.173271879,-0.1508238027\C,0.491430347  
4,2.1644063527,0.105600288\N,1.7859964779,1.5005241731,0.01388262\C,  
2.9256908545,2.2693583333,0.0027417071\O,2.9039951239,3.4856778398,-0.  
0561231676\N,4.0946538437,1.5149515788,0.0320442189\C,5.4106605759,1.9  
866672237,0.0576662473\C,5.7447564566,3.3304413867,0.2884984485\C,6.43  
08061142,1.0385648995,-0.1264199383\C,7.7642466362,1.4151355017,-0.087  
9587748\C,8.0827586951,2.7526253088,0.1344028277\C,7.0838751806,3.7024  
376149,0.3284910275\H,-2.8095746333,1.1299437332,-0.2454841161\H,-2.09  
32757984,2.6490466794,-0.8015645517\H,-2.1638570882,2.2849385298,0.928

8121993\H,-0.4976929599,0.7231664482,-1.1409418453\H,-0.582099623,0.35  
65017316,0.5825208025\H,0.3699568775,2.6405506529,1.0884724605\H,0.478  
7227364,2.9636249124,-0.6409158263\H,1.8432166431,0.5770077191,0.42231  
31816\H,3.9962960489,0.5214934954,-0.1316070473\H,4.9642025641,4.06354  
60007,0.4350274309\H,6.172380869,-0.0049657857,-0.2909688177\H,8.55678  
81999,0.6823373587,-0.2081265147\H,9.7881599085,3.2506208111,0.1597084  
04\O,10.5984677656,2.063190585,0.4320968977\O,9.900593094,4.44923006  
66,0.9897965512\H,7.3567033401,4.7339662248,0.5334052029\O,10.12212679  
74,3.7447920648,-1.5287554839\H,9.9618936343,2.8881474885,-2.18503237  
H,11.1683710732,4.0584682241,-1.5517379059\H,9.4649239201,4.5758499335  
,-1.7890544113\Version=ES64L-G09RevE.01\State=1-A\HF=-1161.800096\ RMS  
D=5.841e-09\ RMSF=8.042e-06\ Dipole=-2.4401217,-1.6298881,-1.2398018\ Qua  
drupole=-4.2302542,4.6076668,-0.3774126,8.1990254,-15.3396003,-3.35054  
94\PG=C01 [X(C11H16N2O3S1)]\@

#### 4.M062X\_6-31pGd\_opt\_water

1\GINC-R3717\FOpt\RM062X\Gen\C11H16N2O3S1\ROOT\30-Oct-2018\0\# M062  
X\Gen 6D SCF=Tight INT(grid=ultrafine) OPT IOP(2/17=4) SCRF=(SMD,Solve  
nt=h2o) maxdisk=2147483648\3Chloro4TFM.M062X\_6-31pGd\_opt\_water\O,  
1\C,-2.0090827246,1.7753965897,-0.0139678909\C,-0.6236195031,1.1420022  
119,-0.0895583396\C,0.4666267849,2.186714157,0.0937141935\N,1.78251760  
34,1.5658040467,0.0016176282\C,2.9072983041,2.2969312163,0.1484766621\  
O,2.8814689615,3.5008316619,0.4418059523\H,4.0802721639,1.5890422342,-  
0.0398578996\C,5.3923282378,2.0503270955,0.0337058381\C,5.7488514022,3.  
3943456619,0.2363785129\C,6.4038781822,1.0831301448,-0.1208199396\C,7  
.7401571886,1.4397419359,-0.0719761342\C,8.076997449,2.7780715458,0.13  
75191508\C,7.0919023697,3.7506937914,0.2856618498\H,-2.7920095479,1.02  
19890751,-0.1411197895\H,-2.1372893254,2.5310406663,-0.79678599\H,-2.1  
641089363,2.2632786038,0.9546467258\H,-0.4908158232,0.6475374156,-1.05  
98686592\H,-0.5194599433,0.3715641926,0.683951544\H,0.3666524498,2.668  
769452,1.0723012931\H,0.3722790853,2.9686245235,-0.6701474329\H,1.8391  
028178,0.6078194885,-0.3270360986\H,3.9835291075,0.5961913928,-0.23089  
01851\H,4.9897709106,4.1531251738,0.354583452\H,6.129332926,0.0433912  
137,-0.2762423854\H,8.5104150361,0.6830502948,-0.1868484746\H,9.779273  
2296,3.2518373349,0.1620831634\O,10.5813882382,2.0813011539,0.56720220  
75\O,9.9103605622,4.4828812764,0.965138233\H,7.3634255177,4.789965106  
2,0.4462051552\C,10.189900076,3.6469324356,-1.5201109789\H,10.03197629  
56,2.7562618857,-2.1316508822\H,11.2419794252,3.9444204197,-1.52857537  
96\H,9.5491383824,4.468936602,-1.8455651922\Version=ES64L-G09RevE.01\  
State=1-A\HF=-1161.8383679\ RMSD=4.572e-09\ RMSF=7.413e-06\ Dipole=-3.218  
0021,-2.8364289,-2.9900456\ Quadrupole=-6.9046103,6.610839,0.2937713,12  
.486628,-16.9460975,-3.1831732\PG=C01 [X(C11H16N2O3S1)]\@

#### 4\_anion.M062X\_6-31pGd\_opt\_water

1\GINC-R3718\FOpt\RM062X\Gen\C11H15N2O3S1(1-)\ROOT\30-Oct-2018\0\#  
M062X\Gen 6D SCF=Tight INT(grid=ultrafine) OPT IOP(2/17=4) SCRF=(SMD,S  
olvent=h2o) maxdisk=2147483648\4SulFOxyMethyl\_al.M062X\_6-31pGd\_opt\_wa  
ter\1,C,-1.9546797156,1.706009016,0.22537293\C,-0.6191977491,1.353  
586973,-0.4224913892\C,0.5296595257,2.1209402848,0.2155478652\N,1.797  
4165887,1.7543989626,-0.4024039038\C,2.9842606518,2.2591221079,0.09954  
84434\O,2.9346080239,3.3075724542,0.8038976919\N,4.069242582,1.5249373  
259,-0.2137248831\C,5.326500111,2.0418604319,-0.0647256636\C,5.6717511  
344,3.4208967333,-0.1267358535\C,6.4002738667,1.1211337944,0.078027373  
4\C,7.7164477583,1.5332819186,0.1729265248\C,8.012129397,2.9010560661,  
0.1247232989\C,6.9896494683,3.8401232248,-0.0407988997\H,-2.777741501  
,1.1564582135,-0.2414476843\H,-2.1665145405,2.7766972027,0.1274536\H,  
1.9491360877,1.4609010605,1.2933387432\H,-0.6516488087,1.5778364394,-1  
4956904016\H,-0.4318083934,0.2759786916,-0.3255436229\H,0.5505797545,  
1.9225184636,1.2979107508\H,0.3684270997,3.1964037096,0.089724388\H,1.  
8610855034,0.7928218979,-0.7190969494\H,4.8924233341,4.1607226361,-0.2  
618486174\H,6.1648345874,0.0612528921,0.1172590253\H,8.511132439,0.80  
16081298,0.2914489772\H,9.6839124353,3.4305695895,0.1727649309\O,10.47  
37925457,2.4488371798,0.9464622078\O,9.7260982377,4.8379410576,0.62150  
65261\H,7.2254537082,4.899340829,-0.1003705174\C,10.2706554253,3.38392  
70571,-1.5051662501\H,10.1890548945,2.3576682674,-1.8694072697\H,11.31  
36703285,3.7110119774,-1.4896594187\H,9.6581992391,4.0629236874,-2.101  
8919523\Version=ES64L-G09RevE.01\State=1-A\HF=-1161.3598227\ RMSD=4.23  
1e-09\ RMSF=2.443e-06\ Dipole=-0.5477146,-1.3257566,-2.9127505\ Quadru  
pole=-13.5382401,6.0707191,7.467521,-0.9150713,-17.3961218,-6.2922403\PG=  
C01 [X(C11H15N2O3S1)]\@

#### 8.M062X\_6-31pGd\_opt

1\GINC-R3710\FOpt\RM062X\Gen\C11H12ClF3N2O1\ROOT\01-Nov-2018\0\# M  
062X\Gen 6D SCF=Tight INT(grid=ultrafine) OPT IOP(2/17=4) maxdisk=2147  
483648\3Chloro4TFM.M062X\_6-31pGd\_opt\O,1\C,-1.9565094212,1.814626811  
8,-0.181558854\C,-0.5874716188,1.1471360095,-0.071528372\C,0.53299707  
31,2.1775467633,-0.0188852695\N,1.8294673454,1.5181930741,0.0830748055  
\O,2.9693909695,2.2662743224,-0.0849748325\O,2.9513398032,3.4305802588  
,0.4416576465\N,4.137755468,1.5503650228,0.1597990633\C,5.4529166222,  
2.0175392486,0.0944684381\C,5.782737842,3.3621239135,-0.118336894\C,6.  
4791277022,1.0785603989,0.2709580441\C,7.8059660159,1.4739234579,0.237  
7573699\C,8.1513423775,2.8088001731,0.0291871439\C,7.1210386503,3.7363  
287784,-0.1463905957\H,-2.7566112053,1.0703399023,-0.2192192228\H,-2.0  
217048368,2.4246438433,-1.0885961776\H,-2.1459478573,2.4687310968,0.67  
61336085\H,-0.4192755117,0.4812344065,-0.9262111339\H,-0.5561875629,0.  
5224546979,0.8321587158\H,0.38179686,2.8684103834,0.8227338003\H,0.544  
7672715,2.7811221557,-0.9303576424\H,1.8741353076,0.7146229583,0.69772  
32771\H,4.0435096833,0.5499670421,0.2759240191\H,5.0093984609,4.102490  
02,-0.2665291767\H,6.2350273865,0.0325285559,0.4370557219\H,8.59031928  
44,0.7380773414,0.375333781\C,7.474195244,5.4175784398,-0.4119541926\  
C,9.6003375943,3.2120749746,-0.0027729808\F,9.9039350019,4.1049015048,  
0.954245616\F,9.9535906643,3.7587257945,-1.1780024741\F,10.4062053861,  
2.1504586494,0.1884865257\Version=ES64L-G09RevE.01\State=1-A\HF=-1370  
.5349342\ RMSD=5.397e-09\ RMSF=3.745e-06\ Dipole=-2.1362019,-2.2848778,0.  
6484399\ Quadrupole=0.0676858,3.7511255,-3.8188112,3.8574915,-2.6584423  
-2.1657264\PG=C01 [X(C11H12ClF3N2O1)]\@

#### 8.M062X\_6-31pGd\_opt\_water

1\GINC-R3721\FOpt\RM062X\Gen\C11H12ClF3N2O1\ROOT\01-Nov-2018\0\# M  
062X\Gen 6D SCF=Tight INT(grid=ultrafine) OPT IOP(2/17=4) SCRF=(SMD,So  
lvent=h2o) maxdisk=2147483648\3Chloro4TFM.M062X\_6-31pGd\_opt\_water\O,  
1\C,-1.9529072718,1.7850364894,-0.1521107346\C,-0.5768991008,1.1520883  
555,0.0282790047\C,0.5263306866,2.1856109742,-0.1382417603\N,1.8334815  
591,1.5667482074,0.0483967279\C,2.9664454673,2.28590839,-0.0834257173\  
O,2.9590766261,3.4809694504,-0.4127416873\N,4.1305222423,1.5811895592,  
0.1662286649\C,5.4430704985,2.0419692235,0.1081359436\C,5.79112872,3.3  
922448447,-0.0453046487\C,6.4620975666,1.0836785871,0.2332606953\C,7.7  
926479081,1.4621629972,0.2001303677\C,8.1536994645,2.8020135709,0.0405  
90888\C,7.1329253097,3.7466889145,-0.0774179383\H,-2.7454252173,1.0401  
039575,-0.0349776869\H,-2.0517352336,2.2292738271,-1.1486814305\H,-2.1  
203154201,2.5754031,0.5878289497\H,-0.4324360110,0.3493176397,-0.70504  
34972\H,-0.5005343947,0.6989463089,1.0244572492\H,0.3960697995,2.99710  
65193,0.5882456943\H,0.4799084335,2.6288391368,-1.1390784577\H,1.87198  
66718,0.6108011411,0.3849701229\H,4.0315992983,0.5877023744,0.35434155  
78\H,5.0330190906,4.1564182313,-0.1340041578\H,6.2011588727,0.03665157  
14,0.356401045\H,8.56392445,0.7057711744,0.2968667246\O,7.50526169,5.  
442474723,-0.2680941106\C,9.6008841939,3.1902630547,0.0021311099\F,9.  
938313689,4.0421519515,0.9927850963\F,9.9459878663,7.988437939,-1.151  
8564575\F,10.4093925979,2.1240291817,0.1259484427\Version=ES64L-G09Re  
vE.01\State=1-A\HF=-1370.5545512\ RMSD=7.957e-09\ RMSF=2.551e-06\ Dipole=  
-2.6963403,-3.8839872,0.8325572\ Quadrupole=-0.6090646,6.140591,-5.5315  
265,7.4986795,-2.8790258,-1.7701773\PG=C01 [X(C11H12ClF3N2O1)]\@

#### 8\_anion.M062X\_6-31pGd\_opt

1\GINC-R3751\FOpt\RM062X\Gen\C11H11ClF3N2O1(1-)\ROOT\31-Oct-2018\0\  
# M062X\Gen 6D SCF=Tight INT(grid=ultrafine) OPT IOP(2/17=4) maxdisk=  
2147483648\3Chloro4TFM\_al.M062X\_6-31pGd\_opt\1,C,-1.9211533525,1.9  
174764124,-0.0617557872\C,-0.5613363464,1.299205945,-0.3816712982\C,0.  
5797330789,2.0228790406,0.3309677718\N,1.8602637904,1.4278486877,0.040  
1669765\C,0.0248882178,2.2180352898,0.0129446538\O,2.9119183472,3.4450  
429754,-0.1472516217\N,4.1307988613,1.4496356336,0.1583359673\C,5.3721  
100809,1.9832996433,0.0955373423\C,5.7290609764,3.3486450375,-0.138924  
5668\C,6.462209695,1.082470764,0.280396383\C,7.776971114,1.4932917179  
,0.2382426334\C,8.1188933665,2.8359069431,0.0069922401\C,7.0560511893,  
3.7306457167,-0.176882686\H,-2.7352852022,1.3981483156,-0.578836207\H,  
-1.9489910826,2.9710899846,-0.3629576867\H,-2.1278921799,1.8772067015,  
1.0144436617\H,-0.368892426,1.3290963064,-1.4605549486\H,-0.5599320969  
,0.2386543489,-0.0927006471\H,0.3707585231,2.046365341,1.4170065206\H,  
0.6385802882,3.0627733024,-0.0037046448\H,2.0374230883,0.5004521577,0.  
405138875\H,4.9473858559,4.0812967485,-0.2844509262\H,6.215623379,0.03  
99403084,0.4580908378\H,8.5722711838,0.7687764278,0.3850291131\O,7.39  
6174444,5.4346218675,-0.4723093549\C,9.5459366098,3.2547826702,-0.0331  
37289\F,9.9249282814,3.7973517038,-1.2155755694\F,10.3845038272,2.2107  
230995,0.1729850275\F,9.8735072132,4.1749369092,0.9062552294\Version=

ES64L-G09RevE.01\State=1-A\HF=-1369.999559\RMSD=7.534e-09\RMSF=4.340e-06\Dipole=-0.3581807,-0.6868843,0.272637\Quadrupole=-19.7412802,7.8418567,11.8994235,-5.0382061,-0.9941732,-0.6634683\PG=C01 [X(C11H11ClF3N2O1)]\@

### 8\_anion.M062X\_6-31pGd\_opt\_water

I\GINC-R133\FOpt\RM062X\Gen\C11H11ClF3N2O1(1-)\ROOT\31-Oct-2018\0\# M062X/Gen 6D SCF=Tight INT(grid=ultrafine) OPT IOP(2/17=4) SCRF=(SMD,Solvent=h2o)\3Chloro4TFM\_a1.M062X\_6-31pGd\_opt\_water\1,1,C,-1.9104619917,1.8227346008,0.1611937628,C,-0.570722233,1.2852514556,-0.3326250596,C,0.5837485316,2.1660061692,0.1225554215,N,1.8554633696,1.6308794376,-0.3452338238,C,3.0421262488,2.2419582923,0.020556736(O),2.9969745304,3.440049789,0.4203668676,N,4.1222013753,1.4432574516,-0.0841391038,C,5.3858997686,1.9619288868,-0.0137176781,C,5.7528512878,3.3074471738,-0.2892309769,C,6.4473756917,1.0701007377,0.285587325,C,7.7654539276,1.4846815304,0.325894511,C,8.1155863161,2.8152792563,0.0630162223,C,7.0785163065,3.7007989502,-0.2497797098,H,-2.7378909031,1.1888816601,-0.1719528521,H,-2.0888680526,2.8356484233,-0.2170379079,H,-1.9372017159,1.8633554635,1.2558832233,H,-0.5702552412,1.2270341325,-1.427945225,H,-0.4178210321,0.2651631892,0.0431723143,H,0.5738173594,2.2501040264,1.2200042152,H,0.4545867225,3.176765887,-0.277528211,H,1.9095073747,0.6189942672,-0.3904870131,H,4.9951166238,4.0347412663,-0.5485153991,H,6.2051458144,0.0311884944,0.4889415132,H,8.5442109445,0.7680334831,0.5668230136,Cl,7.4324096299,5.3809343599,-0.6170517467,C,9.5430716294,3.2456008874,0.1125511898,F,9.9951397238,3.7292775603,-1.0681495321,F,10.3661889622,2.2314186603,0.4391167482,F,9.7742994164,4.2230845077,1.0195511753\Version=ES64L-G09RevE.01\State=1-A\HF=-1370.0769829\RMSD=6.088e-09\RMSF=6.111e-06\Dipole=-0.2250023,-1.5322572,-0.168897\Quadrupole=-9.0276929,4.5529251,4.4747408,-0.7465206,1.9233299,-2.5239932\PG=C01 [X(C11H11ClF3N2O1)]\@

### 12\_anion.M062X.SMD.h2o.opt

I\GINC-R4490\FOpt\RM062X\Gen\C11H11Cl2F3N2O1(1-)\ROOT\10-Jul-2018\0\# M062X/Gen 6D SCF=Tight INT(grid=ultrafine) OPT IOP(2/17=4) Freq=Norman SCRF=(SMD,Solvent=h2o) maxdisk=2147483648\varyl\_urea\_dichloro\_CF3\_a1.M062X.SMD.h2o.opt\1,1,C,-4.0937399789,3.4850692281,-1.0714905315,C,-4.2006549607,2.419643648,-0.1788781896,C,-3.0528800848,1.75256491,0.2132279719,C,-1.7518410116,2.0894642482,-0.2402626668,C,-1.7224797986,3.1666942264,-1.1626783578,C,-2.8517063067,3.8616784596,-1.5712666389,N,-0.6579925965,1.3507903215,0.1135923524,C,0.3655032753,1.9849935147,0.6961586495,N,1.5521835257,1.2658284364,0.7396768772,C,0.3405013078,3.1395900311,1.2146627529,C,2.5343070968,1.5668073097,1.7753888801,C,3.71091757,0.6051158479,1.6952811667,C,4.7443543227,0.8950650078,2.7795179422,H,1.4238450734,0.2748136413,0.5615150332,H,2.0810956777,1.5116976493,2.7771298619,H,2.8891396677,2.5928788316,1.6387515328,H,4.1743532921,0.6840490987,0.7042349653,H,3.3440770353,-0.4247352814,1.7966434409,H,5.135059839,1.914516542,2.6846748104,H,5.5900590523,0.2036287564,2.7148427477,H,4.3041043631,0.7957335586,3.778046448,H,-5.167818972,4.2.1187009558,0.2141159851,H,-2.7586704521,4.6754139356,-2.2828533213,C,-5.3375542714,4.2080711657,-1.4748291528,F,-5.1121011328,5.1585101647,-2.3975350377,F,-6.268800926,3.3768093095,-1.9927511639,F,-5.9394010759,4.8205509244,-0.4297786986,Cl,-0.1991284866,3.6049085521,-1.8963512424,Cl,-2.236610619,0.4342962885,1.345583829\Version=ES64L-G09RevE.01\State=1-A\HF=-1829.6458983\RMSD=2.958e-09\RMSF=2.373e-06\Dipole=-0.6051939,-0.7050399,-0.5499085\Quadrupole=-3.7740786,2.0020841,1.7719944,-2.5041895,-2.9339209,-2.8744007\PG=C01 [X(C11H11Cl2F3N2O1)]\@

### 12.M062X.opt

I\GINC-R3771\FOpt\RM062X\Gen\C11H11Cl2F3N2O1\ROOT\10-Jul-2018\0\# M062X/Gen 6D SCF=Tight INT(grid=ultrafine) OPT IOP(2/17=4) Freq=Norman maxdisk=2147483648\varyl\_urea\_dichloro\_CF3.M062X.opt\0,1,C,-4.1020672406,3.4964938621,-1.0116510989,C,-4.1881832392,2.2963878828,-0.3118163197,C,-3.0214728883,1.6101242639,-0.0167946945,C,-1.758593676,2.0767532369,-0.4168090302,C,-1.7179970922,3.270187356,-1.1522819433,C,-2.8748969743,3.9887428376,-1.434613624N,-0.5905621491,1.3613440121,-0.1313400836,C,0.3933033967,1.9465020578,0.6982775681,N,1.4703050599,1.1257241131,0.8895594068,O,0.269313819,3.046670427,1.1941120142,C,2.6144774146,1.6145287809,1.6481988808,C,3.5462406832,0.4663436862,2.0139277475,C,4.7540987215,0.956805829,2.8090990578,H,-0.7290152035,0.3678163463,0.0176337884,H,1.6573645191,0.4407269505,0.1672768333,H,2.2250858209,2.0977315983,2.5485942375,H,3.1556051717,2.3834187692,1.0787607796,H,3.888858962,-0.0346376214,1.0978882135,H,2.9854068152,-0.2767741485,2.59

29696407,H,5.3349701728,1.6855533429,2.2337871682,H,5.4185310846,0.1282451091,3.0692375277,H,4.4390391803,1.4400048224,3.7399644223,H,-5.1467428617,1.9060830266,0.0147191213,H,-2.8082205867,4.9133650486,-1.9964027429,C,-5.3757632216,4.2363626169,-1.3131299621,F,-5.1553088474,5.380496628,-1.9757357508,F,-6.2114593593,3.493525124,-2.062698992,F,-6.0456221302,4.5448042931,-0.1883530227,Cl,-0.2131578039,3.8497484863,-1.7795847456,Cl,-3.1284844814,0.1205412621,0.8785847598\Version=ES64L-G09RevE.01\State=1-A\HF=-1830.1007854\RMSD=9.502e-09\RMSF=5.760e-06\Dipole=1.2868621,-1.5537144,-0.0445701\Quadrupole=3.4211721,0.4361818,-3.857354,-3.8762883,-0.1015435,-2.3401996\PG=C01 [X(C11H11Cl2F3N2O1)]\@

### 12\_anion.M062X.opt

I\GINC-R4313\FOpt\RM062X\Gen\C11H11Cl2F3N2O1(1-)\ROOT\10-Jul-2018\0\# M062X/Gen 6D SCF=Tight INT(grid=ultrafine) OPT IOP(2/17=4) Freq=Norman maxdisk=2147483648\varyl\_urea\_dichloro\_CF3\_a1.M062X.opt\1,1,C,-4.0881915047,3.4847035518,-1.1477936907,C,-4.2670922012,2.3908214461,-0.2978147132,C,-3.1639125841,1.7350906233,0.2098719949,C,-1.8075788608,-2.1087808016,-0.0557026823,C,-1.701935425,3.202903891,-0.975527107C,-2.794393275,3.8796686824,-1.4881391431,N,-0.8019080333,1.3864102139,0.449429816,C,0.3093728466,1.987319624,0.9369344102,N,1.3874488743,1.0901656922,1.0363736385,O,0.4398781462,3.1547176476,1.3249586649,C,2.4478781135,1.3505734248,1.9811180835,C,3.7677527919,0.726848924,1.5337137582,C,4.8921892619,0.9834239976,2.5354265463,H,1.0858828197,0.1272373086,0.9465690012,H,2.1982578305,0.9867772552,2.9952716727,H,2.5430894342,2.4381368891,2.0488465745,H,4.02739999,1.135458991,0.550103077,H,3.6342327695,-0.3557647788,1.3976151335,H,5.0542235832,2.0591813403,2.6699055074,H,5.8379695856,0.5392347175,2.2066069708,H,4.6472586207,0.5620744468,3.5177278775,H,-5.2631041248,2.0529976387,-0.029852389H,-2.6327721655,4.698434178,-2.1820163463,C,-5.2649378519,4.2445581763,-1.642115357,F,-5.030036959,4.8702848824,-2.8169550076,F,-6.3513191497,3.4600445396,-1.8318164511,F,-5.6766912458,5.2209498455,-0.7906811939,Cl,-0.1344964572,3.6422866459,-1.6036845802,Cl,-3.4433948298,0.369651337,1.265996184\Version=ES64L-G09RevE.01\State=1-A\HF=-1829.5643446\RMSD=6.370e-09\RMSF=1.213e-06\Dipole=0.071471,-0.4856177,-0.310418\Quadrupole=-10.7535696,5.5239315,5.2296382,2.9699964,-7.7293222,1.8388921\PG=C01 [X(C11H11Cl2F3N2O1)]\@

### 12.M062X.SMD.h2o.opt

I\GINC-R3771\FOpt\RM062X\Gen\C11H11Cl2F3N2O1\ROOT\10-Jul-2018\0\# M062X/Gen 6D SCF=Tight INT(grid=ultrafine) OPT IOP(2/17=4) Freq=Norman SCRF=(SMD,Solvent=h2o) maxdisk=2147483648\varyl\_urea\_dichloro\_CF3.M062X.SMD.h2o.opt\0,1,C,-4.0977807217,3.4993409941,-1.0160881138,C,-4.1595492663,2.3656665111,-0.2108722127,C,-2.9829805823,1.6907337813,0.0756006447,C,-1.7435113545,2.1005592118,-0.4400087194,C,-1.734432149,3.2332346194,-1.2652560628,C,-2.8945732609,3.9446343332,-1.548266367,N,-0.5644725679,1.3941720136,-0.1650983682,C,0.4167200142,1.9607875547,0.6443347632,N,1.4732647057,1.1684256105,0.8947308805,O,0.3134447017,3.1139717649,1.0832477004,C,2.5577073217,1.601727645,1.7685065068,C,3.5974935867,0.5001945138,1.9047166607,C,4.7367546623,0.930840559,2.822727715,H,-0.6299085217,0.3800625698,-0.1592141732,H,1.5154037845,0.2417529105,0.4843261296,H,2.1483285151,1.8595857708,2.7522934984,H,3.0180682466,2.5062893756,1.3546505615,H,3.9897085364,0.2495863934,0.9114814543,H,3.1171094215,-0.4027624239,2.3010502347,H,5.2370323657,1.8243951559,2.4335342299,H,5.485537761,0.1387110655,2.9155517655,H,4.3641497966,1.1626955903,3.8265720078,H,-5.1032242923,2.0211629792,0.201629021,H,-2.852390011,4.8205804385,-2.1862469485,C,-5.3790756334,4.2191189101,-1.3254927657,F,-5.1778286458,5.3810072222,-1.9642695438,F,-6.1924787879,3.4786198575,-2.1060546489,F,-6.080388849,4.497071604,-0.2098503194,Cl,-0.2476304955,3.7491584066,-1.9979248076,Cl,-3.0454200905,0.3022950619,1.1213763392\Version=ES64L-G09RevE.01\State=1-A\HF=-1830.1175567\RMSD=5.930e-09\RMSF=1.000e-05\Dipole=1.2433274,-2.7440607,-0.1444095\Quadrupole=2.7160312,2.5957037,-5.3117349,-8.554226,0.7462797,-4.2646706\PG=C01 [X(C11H11Cl2F3N2O1)]\@

### 9.M062X\_6-31pGd\_opt

I\GINC-R3716\FOpt\RM062X\Gen\C11H11F3N2O3S1\ROOT\30-Oct-2018\0\# M062X/Gen 6D SCF=Tight INT(grid=ultrafine) OPT IOP(2/17=4) maxdisk=268435460\4SulfOxyCF3.M062X\_6-31pGd\_opt\0,1,C,-2.0010428586,1.8457922452,-0.0802217512,C,-0.6280795585,1.1881093543,-0.199730912,C,0.4909660297,2.1715336782,0.1173105902,N,1.7911286441,1.5222062396,-0.0032823291,C,2.9251796531,2.2937181757,0.0193232059,O,2.9015059241,3.5108533237,0.0178274491,N,4.1005460897,1.5424107228,0.0071138117,C,5.4113364331,2.012427542,0.0606729887,C,5.7425655791,3.3610018192,0.273442757,C,6.43

42840347,1.0581770941,-0.0921500446\C,7.7652610177,1.4299920546,-0.031  
 0973253\C,8.0771422241,2.772448547,0.184766214\C,7.0789643815,3.732583  
 1006,0.339631109,H,-2.7997741089,1.135362637,-0.3098762045,H,-2.09188  
 46795,2.6891412553,-0.7726990869,H,-2.1693865933,2.248341767,0.933325  
 1295,H,-0.4814448853,0.7954757369,-1.2128901096,H,-0.5713299435,0.3320  
 24479,0.4870890679,H,0.3608399052,2.5921329934,1.1244367314,H,0.478366  
 2693,3.0098810218,-0.5843934688,H,1.8513475808,0.5717171322,0.34065927  
 27,H,4.0043590024,0.5523619711,-0.1778058341,H,4.9602517835,4.09741663  
 48,0.392322073,H,6.1767146157,0.0142069758,-0.2528271913,H,8.558538358  
 1,0.6963002065,-0.1368037693,S,9.766966969,3.2587831967,0.2541742781\O  
 ,10.5974129768,2.1023086784,0.5509458271\O,9.889487575,4.5227285377,0.  
 9612589667,H,7.3514008765,4.7684492823,0.5190100027\C,10.1373533318,3.  
 6665644804,-1.5237031214\F,11.4021855692,4.0489420082,-1.6277020261\F  
 ,9.9370507346,2.5949543986,-2.2878909408\F,9.343684886,4.6485984999,-1  
 .9425773257\Version=ES64L-G09RevE.01\State=1-A\HF=-1459.435642\RMDS=3  
 .887e-09\RMSF=2.086e-06\Dipole=-3.1182809,-2.0747144,-0.3116659\Quadru  
 pole=-1.3693055,5.0674997,-3.6981942,8.4847527,-7.1167572,-1.851644\PG  
 =C01[X(C11H13F3N2O3S1)]\@

**9\_anion.M062X\_6-31pGd\_opt\_water**

I\1\GINC-R4423\FOpt\RM062X\Gen\C11H12F3N2O3S1(1-)\ROOT\30-Oct-2018\O\#  
 # M062X/Gen 6D SCF=Tight INT(grid=ultrafine) OPT IOP(2/17=4) SCRF=(SMD  
 ,Solvent=h2o) maxdisk=2684354560\4SulfOxyCf3\_a1.M062X\_6-31pGd\_opt\_wat  
 er\,1\C,-1.9389527813,1.8732122955,-0.13787557\C,-0.5881948127,1.25  
 68698097,0.2123523142\C,0.5578171545,2.1958329688,-0.1350741303,N,1.83  
 87027267,1.581885765,0.1847583377\C,0.197432882,2.2212976696,-0.1037  
 989546\O,2.9955419536,3.4559032319,-0.353500213\N,4.0986282227,1.39630  
 71054,-0.1217963365\C,5.3544606253,1.8903025352,-0.0307430016\C,5.7255  
 485971,3.1714622814,0.4878892354\C,6.4229221262,1.0236750142,-0.419883  
 0503\C,7.7439677324,1.3954832222,-0.3276139835\C,8.0627069811,2.666204  
 4736,0.187025499\C,7.047618619,3.549027905,0.5935106826,H,-2.759836249  
 1,1.1971494466,0.1197778385,H,-2.0048293359,2.0899044418,-1.2099237037  
 \H,-2.0929562509,2.8123939688,0.4505234754\H,-0.4578124839,0.311723022  
 3,-0.3304848022\H,-0.5494176463,1.0205281225,1.2827172466\H,0.45660827  
 03,3.1275834229,0.431159188\H,0.511621302,2.4594750431,-1.2020717605\H  
 ,1.8767268782,0.5695798862,0.1463559755\H,4.9564358962,3.8539459834,0.  
 8245712091\H,6.1667432952,0.0396858531,-0.8013447114\H,8.5310160008,0.  
 7150381616,-0.6404522039\S,9.7073737616,3.1705471267,0.2589105006\O,10  
 .6209868208,2.0251759028,0.250615237\O,9.8963908163,4.2538319199,1.227  
 2146946\H,7.3034700408,4.522627006,1.0028789786\C,10.0337677678,3.9952  
 813229,-1.3753654872\F,11.2896489294,4.4319346339,-1.4035474763\F,9.85  
 11802624,3.131109217,-2.368926868\F,9.2106868911,5.0266224294,-1.53806  
 71596\Version=ES64L-G09RevE.01\State=1-A\HF=-1458.9882849\RMDS=9.162e  
 -09\RMSF=8.404e-06\Dipole=-1.1123745,-0.8083526,-0.8647578\Quadrupole=  
 -19.4125568,10.313337,9.0992199,4.1094909,-8.4107552,0.9929282\PG=C01  
 [X(C11H12F3N2O3S1)]\@

**9\_anion.M062X\_6-31pGd\_opt**

I\1\GINC-R4385\FOpt\RM062X\Gen\C11H12F3N2O3S1(1-)\ROOT\31-Oct-2018\O\#  
 # M062X/Gen 6D SCF=Tight INT(grid=ultrafine) OPT IOP(2/17=4) maxdisk=2  
 684354560\4SulfOxyCf3\_a1.M062X\_6-31pGd\_opt\,1\C,-1.4110125272,2.01  
 65566207,0.8115790793\C,0.0005665159,1.5316972596,0.4877601381\C,0.413  
 2576609,1.8893584764,-0.943339119\N,1.7558169893,1.4890985161,-1.29042  
 05233\C,2.8454060866,2.1739891446,-0.7433508617\O,2.6540037478,3.29258  
 60614,-0.240968523\N,3.9924723242,1.4507603009,-0.8711270373\C,5.17895  
 67636,1.9323987351,-0.4737262769\C,5.4640092876,3.2173071507,0.1065403  
 349\C,6.3025454429,1.0535900523,-0.6466218876\C,7.5799736584,1.4011740  
 447,-0.2858975528\C,7.8156628079,2.669177385,0.2849074457\C,6.7475756  
 701,3.5669223024,0.4674035264\H,-1.7055851671,1.7559686901,1.833719254  
 \H,-2.1477341946,1.5753296061,0.1282061637\H,-1.4770804107,3.106122764  
 7,0.7118561631\H,0.066731653,0.4431650421,0.6205586613\H,0.7273257278,  
 1.9868482779,1.169620237\H,0.352546405,2.9752349665,-1.0713853674\H,0.  
 2824395541,1.429995356,-1.6590923005\H,1.9381402766,0.5075917823,-1.  
 4525666237\H,4.6465546491,3.9073814043,0.2612192876\H,6.0963026052,0.0  
 793259356,-1.0797853775\H,8.4095567909,0.7126013022,-0.4217097307\S,9.  
 4187741294,3.14453856,0.6803590835\O,10.2952633631,1.9862651689,0.8446  
 964955\O,9.4346280449,4.2494921359,1.6362554907\H,6.9459197159,4.53981  
 24493,0.9101541184\C,10.0782416587,3.9366216046,-0.8720470328\F,11.336  
 4925096,4.3419448903,-0.6775083365\F,10.0702425067,C,0.0716741957,-1.888  
 8510924\F,9.3451977708,4.9970704637,-1.2159377881\Version=ES64L-G09Re  
 vE.01\State=1-A\HF=-1458.9104721\RMDS=3.109e-09\RMSF=3.924e-06\Dipole=  
 -0.4749481,-0.3462987,-0.5897039\Quadrupole=-26.8526346,15.2310702,11.  
 6215644,-1.2647544,-8.8568806,-1.1633887\PG=C01[X(C11H12F3N2O3S1)]\@

**9.M062X\_6-31pGd\_opt\_water**

I\1\GINC-R3752\FOpt\RM062X\Gen\C11H13F3N2O3S1\ROOT\30-Oct-2018\O\# M0  
 62X/Gen 6D SCF=Tight INT(grid=ultrafine) OPT IOP(2/17=4) SCRF=(SMD,Sol  
 vent=h2o) maxdisk=2684354560\4SulfOxyCf3.M062X\_6-31pGd\_opt\_water\0,1  
 \C,-1.9975838106,1.7789303913,-0.0127286701\C,-0.610608386,1.151263683  
 4,-0.1041962688\C,0.4774723441,2.2028797606,0.0493724132\N,1.794425303  
 5,1.5849970306,-0.0507827099\C,2.91744085035,2.3162594073,0.082276817\N  
 O,2.8966739987,3.5343150794,0.3030423412\N,4.0931013522,1.5907393613,-  
 0.0484500269\C,5.4000302381,2.0427878792,0.0443302077\C,5.7584955071,3  
 .377580913,0.3123992442\C,6.4105507279,1.076276379,-0.1451335991\C,7.  
 7449987777,1.4223041057,-0.0729218922\C,8.0792526846,2.7536305764,0.19  
 91308953\C,7.0980120613,3.7285375752,0.3869854927\H,-2.7785333445,1.02  
 03876371,-0.1196879738\H,-2.1422075045,2.5257564623,-0.8010975163\H,-2  
 .1395495067,2.2758914276,0.9532268312\H,-0.4905262078,0.6457302795,-1.  
 0702467072\H,-0.4900591744,0.3909721104,0.6771576258\H,0.3856701649,2.  
 7029034106,1.0203619322\H,0.3751603128,2.9694357671,-0.7278733862\H,1.  
 8499577573,0.5882236005,-0.2299295885\H,3.9920858528,0.5988920371,-0.2  
 445908711\H,5.0003113687,4.1312766154,0.4630955418\H,6.1327381882,0.04  
 59962874,-0.3476741677\H,8.5150201005,0.6710577701,-0.2188647192\S,9.7  
 600087543,3.216919327,0.2469202327\O,10.61391652,2.056993648,0.4945756  
 988\O,9.9418658674,4.4522209012,1.0066560192\H,7.3737280542,4.75774554  
 59,0.596426649\C,10.1360187529,3.700341513,-1.5095086221\F,11.4070188  
 959,4.0757898479,-1.585240613\F,9.9318213922,2.6672029367,-2.317682829  
 4\F,9.3555844536,4.7090235543,-1.8777877806\Version=ES64L-G09RevE.01\  
 State=1-A\HF=-1459.4630757\RMDS=5.273e-09\RMSF=7.4706016\PG=C01  
 0964,-3.3556381,-1.2227587\Quadrupole=-4.6992877,8.7517511,-4.0524634,  
 14.6666191,-5.4570017,-1.2607973\PG=C01[X(C11H13F3N2O3S1)]\@

**11.M062X\_6-31pGd\_opt**

I\1\GINC-R3751\FOpt\RM062X\Gen\C10H12ClF5N2O1S1\ROOT\31-Oct-2018\O\#  
 M062X/Gen 6D SCF=Tight INT(grid=ultrafine) OPT IOP(2/17=4) maxdisk=26  
 84354560\3SF55Chloro.M062X\_6-31pGd\_opt\,0,1\C,-1.8313614645,1.5664542  
 783,0.1428751125\C,-0.4028537498,1.0268055488,0.1286769734\C,0.6143487  
 873,2.1473274355,-0.042876205\N,1.9706831447,1.6107368696,-0.045657926  
 8\C,3.027619147,2.4831739217,0.0300145314\O,2.8914250719,3.6775959876,  
 0.2228544977\N,4.2668560775,1.8598484081,-0.1029688818\C,5.5241371208,  
 2.469933185,-0.0615582737\C,5.7055606952,3.8594474363,-0.0974141921\C,  
 6.6423085702,1.6277691458,-0.0070858381\C,7.9193256972,2.1681053241,0.  
 101822777\C,8.1346329797,3.5409016127,-0.2032017179\C,7.0046058648,4.3  
 45330402,-0.0768418135\H,-2.5572109911,0.758217505,0.2667817414\H,-2.  
 0648815813,2.0879160649,-0.7913844228\H,-1.9728520603,2.2746254262,0.9  
 659860407\H,-0.293371117,0.3014179341,-0.689652227\H,-0.1896963532,0.4  
 912770949,1.0613734188\H,0.5469220844,2.8590979363,0.7842412601\H,0.41  
 8112631,2.7084079686,-0.9674188508\H,2.1066143735,0.7409941318,-0.5463  
 3904\H,4.2755319665,0.8496892866,-0.052122342\H,4.8518674269,4.5211144  
 854,-0.12990053\H,6.5203752268,0.5487038092,0.0214740744\H,9.136705718  
 1,3.950934494,-0.0070436455\S,7.2408031133,3.1477680661,-0.1248846485\F,  
 6.1664904541,6.3244667561,-1.3123427275\F,8.4242111064,6.0251248554,  
 -1.2167205251\F,6.0819229495,6.3991032202,0.9630859962\C1,9.2867865143  
 ,1.0953068718,0.078779491\F,7.456737613,7.7380021819,-0.1694435944\F,8  
 .3393129835,6.0980797175,1.056871987\Version=ES64L-G09RevE.01\State=1  
 -A\HF=-1930.0962802\RMDS=9.203e-09\RMSF=4.360e-06\Dipole=-1.5333625,-2  
 .7430307,-0.3073349\Quadrupole=5.4712852,0.3739384,-5.8452236,8.104772  
 8,2.1052901,1.5223336\PG=C01[X(C10H12ClF5N2O1S1)]\@

**11.M062X\_6-31pGd\_opt\_water**

I\1\GINC-R4423\FOpt\RM062X\Gen\C10H12ClF5N2O1S1\ROOT\30-Oct-2018\O\#  
 M062X/Gen 6D SCF=Tight INT(grid=ultrafine) OPT IOP(2/17=4) SCRF=(SMD,  
 Solvent=h2o) maxdisk=2684354560\3SF55Chloro.M062X\_6-31pGd\_opt\_water\  
 0,1\C,-1.8209571608,1.5055211498,-0.0992953652\C,-0.3995589595,1.04466  
 21793,0.2063773357\C,0.606014931,2.1496847962,-0.0771310243\N,1.961462  
 4612,1.6884196919,0.2024038999\C,3.0185763471,2.5088997088,0.028973772  
 9\O,2.8916091967,3.7087202509,-0.2537421753\N,4.2521337789,1.907346418  
 ,0.2071879382\C,5.050587443,2.4973184623,0.0498424836\C,5.7153209616,  
 3.8822862059,0.0851691998\C,6.5997773549,1.6360907774,-0.1142414887\C,  
 7.8749639778,2.1607759862,-0.2454140831\C,8.1236743225,3.5297626936,-0  
 .2310856434\C,7.0144913939,4.3462112952,-0.0636217646\H,-2.5439992052,  
 2.113806652,0.108786736\H,-1.9229848253,1.7873223216,-1.1530509514\H,  
 -2.0898674162,2.3753204489,0.5101639044\H,-0.1522667826,0.1655054662,-  
 0.4020959357\H,-0.3194097412,0.7437909335,1.2579469961\H,0.3924781311,  
 3.0225872754,0.5486916906\H,0.5318213906,2.4682432945,-1.1245702312\H,  
 2.1135650714,0.6923821486,0.3235944207\H,4.2590372376,0.8970042592,0.3

117395539H,4.8857809958,4.5585884683,0.2312829502H,6.4434189923,0.5615502583,-0.1394139578H,9.1289516275,3.9188695642,-0.3432799326S,7.277563561,6.1406040159,-0.0252776541F,6.0194245873,6.4312004182,-0.9938085171F,8.2548704217,6.106204752,-1.31094919F,6.3260634874,6.3371782545,1.2642476428C,9.2186475731,1.0681259335,-0.4463806734F,7.514914119,7.7388211916,0.0086959447F,8.5613233373,6.0136007148,0.9465946275\\Version=ES64L-G09RevE.01\\State=1-A\\HF=-1930.114621\\RMSD=4.435e-09\\RMSF=5.702e-06\\Dipole=-1.752688,-4.3353976,0.4212078\\Quadrupole=4.2952473,3.555779,-7.8510263,12.8889754,-2.1346836,-1.286257\\PG=C01 [X(C10H12Cl1F5N2O1S1)]\\@

#### 11\_anion.M062X\_6-31pGd\_opt\_water

\\GINC-R4407\\FOpt\\RM062X\\Gen\\C10H11Cl1F5N2O1S1(1-)\\ROOT\\30-Oct-2018\\0\\# M062X\\Gen 6D SCF=Tight INT(grid=ultrafine) OPT IOP(2/17=4) SCRF=(SMD,Solvent=h2o) maxdisk=2684354560\\3SF55Chloro\_a1.M062X\_6-31pGd\_opt\_water\\-1,\\C,-1.7685988408,1.5221527416,0.2592352266,-0.4008699954,1.1828061519,-0.3254345024C,0.6732813986,2.1329988775,0.1836644879N,1.9753040972,1.7811181138,-0.3685431467C,3.1068768874,2.4689683736,0.0373112219O,0.29572537963,6.154666808,5.486398223N,4.2554221349,1.7953933019,-0.1595382021C,5.460643938,2.4351723413,-0.0357491784C,5.6840075942,3.8267880606,-0.2068672127C,6.6026056532,1.6335339885,0.2062994077C,7.8663416973,2.1915745477,0.2839879418C,8.1040903913,3.5546424916,0.1292366733C,6.972721202,4.3242513531,-0.1198719101H,-2.5385194163,0.8400062101,-0.1139965995H,-2.0653976827,2.5428581942,-0.0071432102H,-1.7564783083,1.4503582869,1.352571763H,-0.4376785501,1.2326490819,-1.4205535626H,-0.1277226680,1.1530763193,-0.060012624H,0.6949206281,2.1098605169,1.283934757H,0.4275756969,3.1582672968,-0.1106995807H,2.1289708644,0.7878753917,-0.5070001802H,4.8484174592,4.479361597,-0.4183983556H,6.4713846666,0.5633024635,0.3315805752H,9.1018383344,3.9703713704,0.1980927372S,7.2073876514,6.108838147,-0.3547307228F,6.2423471229,6.1601956406,-1.6516576259F,8.488365323,5.9037753694,-1.3226369028F,5.9524805162,6.4943805179,0.5894063208C,9.2351465401,1.1430906069,0.5947537526F,7.4208362549,7.7012118673,-0.5643140065F,8.1987344037,6.2367341358,0.9184528359\\Version=ES64L-G09RevE.01\\State=1-A\\HF=-1929.6385112\\RMSD=4.397e-09\\RMSF=6.424e-06\\Dipole=-0.448088,-0.5874985,-0.3277166\\Quadrupole=-0.0081924,-3.6039748,3.6121672,2.5415931,2.2081056,-0.3270603\\PG=C01 [X(C10H11Cl1F5N2O1S1)]\\@

#### 11\_anion.M062X\_6-31pGd\_opt

\\GINC-R4407\\FOpt\\RM062X\\Gen\\C10H11Cl1F5N2O1S1(1-)\\ROOT\\30-Oct-2018\\0\\# M062X\\Gen 6D SCF=Tight INT(grid=ultrafine) OPT IOP(2/17=4) maxdisk=2684354560\\3SF55Chloro\_a1.M062X\_6-31pGd\_opt\\-1,\\C,-1.7892818769,1.6686475059,0.0973048239C,-0.3748173225,1.2187639133,0.458582742C,0.6865276347,1.9545733727,-0.3576043864N,2.0207453024,1.5193827482,-0.0271060773C,0.996395082,2.4193958459,-0.0178285931O,2.866678892,3.6394719104,-0.0242084946N,4.2789536215,1.7582354198,-0.145074333C,5.455438287,2.4268186475,-0.131100758C,5.6607619738,3.8394570296,-0.027983617C,6.6323272792,1.6292533311,-0.2270169579C,7.8898617748,2.1952444403,-0.2207628687C,8.1090763572,3.5668379729,-0.1209007029C,6.9511370033,4.335664174,-0.026937972H,-2.5462781247,1.1420406345,0.6884100086H,-2.0023565804,1.4829905075,-0.9622753749H,-1.9117238809,2.7434788905,0.2742244529H,-0.2773618259,0.1361377983,0.2954929324H,-0.1748987939,1.3937356175,1.5221769181H,0.6509759099,3.0276109062,-0.147531845H,0.4664123768,1.8294426745,-1.4341002603H,2.2895069062,0.5822993796,-0.2990740633H,4.7992916254,4.4885870387,0.0448308151H,6.5081274611,0.5545082542,-0.3045366832H,9.1036852342,3.9913295962,-0.1177518482S,7.1665858081,6.136947535,0.1054614867F,6.0233688663,6.4614318759,-0.986872098F,8.2920747125,6.180917747,-1.0666557947F,6.0825746539,6.2870364159,1.2920321377C,9.2978106841,1.1416352884,-0.3432028285F,7.3775023097,7.7456004276,0.223173761F,8.3512186812,6.0063197523,1.2108529397\\Version=ES64L-G09RevE.01\\State=1-A\\HF=-1929.5660763\\RMSD=4.533e-09\\RMSF=4.147e-06\\Dipole=-0.0254648,-0.0182856,-0.1490213\\Quadrupole=-9.6155157,-2.4767009,12.0922167,-2.6615162,1.4983354,0.3917027\\PG=C01 [X(C10H11Cl1F5N2O1S1)]\\@

#### DPU\_anion.M062X.SMD.h2o.opt

\\GINC-R3745\\FOpt\\RM062X\\Gen\\C13H11N2O1(1-)\\ROOT\\21-Aug-2018\\0\\# M062X\\Gen 6D SCF=Tight INT(grid=ultrafine) OPT IOP(2/17=4) Freq=Noraman SCRF=(SMD,Solvent=h2o) maxdisk=2147483648\\diph\_a1.M062X.SMD.h2o.opt\\-1,\\C,-4.1740771105,2.1374006512,-0.074373422C,-3.966840899,0.9034982512,0.5458001574C,-3.0876159998,2.7736309984,-0.6797644945C,-1.8182826112,2.1992808181,-0.659055739C,-1.5874332904,0.9585623373,-0.0246660137C,-2.6996170373,0.3250703275,0.5665770833N,-0.3679721118,0.2853

381401,-0.0328140501C,0.7550672656,0.9764098894,0.1352002046O,0.9027130376,2.1899750798,0.4589326391N,1.8988664075,0.1808590463,-0.042842131C,3.2477486781,0.5244415373,0.010931732C,3.7524227724,1.7031711395,0.5873979025C,5.1286515853,1.9346965285,0.6085457652C,6.03083401673,1.0157199229,0.0756590999C,5.5317153446,-0.1607521558,-0.4890294454C,4.1639660111,-0.4029379691,-0.5237769879H,-5.1610949798,2.5900985106,-0.0925011229H,-4.797903246,0.3849084212,1.0175961088H,-3.2294226478,3.7283090446,-1.1808734404H,-0.9929812277,2.7041582469,-1.1513578095H,-2.5499582492,-0.6389088392,1.0473068089H,1.7011317135,-0.7464467143,-0.3998147434H,3.0760889044,2.4278570963,1.0178413357H,5.494285732,2.8535965571,1.0595649655H,7.0989668475,1.2082348816,0.1010847957H,6.2109297735,-0.8966918602,-0.9108731602H,3.7856304798,-1.3203198871,-0.9695059567\\Version=ES64L-G09RevE.01\\State=1-A\\HF=-686.6350162\\RMSD=4.528e-09\\RMSF=7.991e-06\\Dipole=-1.5049147,-0.9221513,-0.6412385\\Quadrupole=-3.2889565,3.5940929,-0.3051364,-2.6678948,-2.0929801,-0.3886225\\PG=C01 [X(C13H11N2O1)]\\@

#### DPU\_anion.M062X.opt

\\GINC-R3745\\FOpt\\RM062X\\Gen\\C13H11N2O1(1-)\\ROOT\\21-Aug-2018\\0\\# M062X\\Gen 6D SCF=Tight INT(grid=ultrafine) OPT IOP(2/17=4) Freq=Noraman maxdisk=2147483648\\diph\_a1.M062X.opt\\-1,\\C,-4.2541410926,2.036782342,0.0001086757C,-3.9948324717,0.6617973815,0.0001106889C,-3.1652534791,2.9093112113,0.0000882662C,-1.8499227769,2.4478269296,0.0000703372C,-1.5669392659,1.0554286909,0.000721748C,-2.6909111525,0.1881927106,0.0000929443N,-0.3349540516,0.4462326282,0.0000556993C,0.7921909384,1.1619699535,0.0000361444O,1.0037165611,2.3879716561,2.0000318283N,1.9111326746,0.2720408961,0.0000280139C,3.2590402921,0.5375729656,0.0000141376C,3.8106121369,1.8375015306,0.000044039C,5.1916233215,2.057480352,-0.000092007C,6.0705321513,0.9207647478,-0.0000139386C,5.5293052349,-0.3657418127,-0.0000045548C,4.1536860015,-0.5560807984,0.000091934H,-5.2738854995,2.4138319706,0.0001226265H,-4.8209834644,-0.0478972448,0.0001263761H,-3.3397814553,3.9846489365,0.0000862038H,-1.0231676649,3.1455256195,0.0000547213H,-2.48801858425,-0.8801113374,0.0000944896H,1.6250929801,-0.697905757,0.0000353051H,3.1357634867,2.6828462631,0.000079962H,5.5888541242,3.018793962,-0.0000163793H,7.1461922507,1.0727154941,-0.0000246561H,6.1839088305,-1.2347847913,-0.000079322H,3.7471272324,-1.5658228111,0.0000164351\\Version=ES64L-G09RevE.01\\State=1-A\\HF=-686.549124\\RMSD=5.830e-09\\RMSF=2.718e-05\\Dipole=-1.2909176,-0.6741596,-0.0000105\\Quadrupole=-19.2086273,12.4514524,6.7571749,1.5900223,0.0003137,-0.0000384\\PG=C01 [X(C13H11N2O1)]\\@

#### DPU.M062X

\\GINC-R3726\\FOpt\\RM062X\\Gen\\C13H11N2O1\\ROOT\\21-Aug-2018\\0\\# M062X\\Gen 6D SCF=Tight INT(grid=ultrafine) OPT IOP(2/17=4) maxdisk=2147483648\\diph.M062X\\0,\\C,-4.0552547451,1.6100548893,2.0400604329C,-3.9146099005,0.4579698094,1.2711531945C,-2.9215574331,2.3513974264,2.3574439922C,-1.6551933627,1.9676329742,1.9249218816C,-1.5213018508,0.810388847,1.149725389C,-2.6601018715,0.0613568937,0.8291780996N,-0.2890694121,0.3251368081,0.6727932271C,0.9443582175,0.9479299335,0.7384228463O,1.1286041188,2.0397973535,1.2406029593N,1.9434225849,0.1818425538,0.1652757413C,3.108227859,0.49769741,0.0567258841C,3.8505663929,1.7455674061,0.3877400555C,5.2173532401,1.9569832291,0.2288990602C,6.0547464208,0.9586532825,-0.2539244443C,5.134816549,-0.279553466,-0.584016394C,1.53328676,-0.5090825587,-0.4303501269H,-5.0342761894,1.9241597314,2.3861247614H,-4.7836819591,-0.1380793483,1.0103609279H,-3.0148120773,3.2519073768,2.9569427521H,-0.7822992407,2.5522672006,2.1748147228H,-2.5584629059,-0.8393454814,0.2273654641H,-0.3557791401,-0.5292691981,0.1380423201H,1.707587557,-0.7566478554,-0.124612792H,3.2081677439,2.5268100206,0.7661208525H,5.626456427,2.9282296752,0.490259451H,7.120336129,1.141439284,-0.3715002227H,6.1477654566,-1.0748386329,-0.9635837333H,3.7358826833,-1.4798831392,-0.6893075959\\Version=ES64L-G09RevE.01\\State=1-A\\HF=-687.0717424\\RMSD=7.527e-09\\RMSF=1.136e-06\\Dipole=-0.2170388,-1.2861989,-0.5915888\\Quadrupole=3.560782,2.3947482,-5.9555302,0.895608,-1.4311447,5.2655488\\PG=C01 [X(C13H11N2O1)]\\@

#### DPU.smd.h2o

\\GINC-R3726\\FOpt\\RM062X\\Gen\\C13H11N2O1\\ROOT\\21-Aug-2018\\0\\# M062X\\Gen 6D SCF=Tight INT(grid=ultrafine) OPT IOP(2/17=4) SCRF=(SMD,Solvent=h2o) maxdisk=2147483648\\diph.smd.h2o\\0,\\C,-3.9478017914,1.4757822021,2.2791682321C,-3.7822281311,0.2662902769,1.6060985591C,-2.902336307,2.3957520395,2.2886044688C,-1.6999950099,2.1255097762,1.6389520086C,-1.5318701906,0.9015682709,0.9823602014C,-2.5831161048,-0.0227435

593,0.9657104999\N,-0.3603937714,0.561568054,0.276880823\C,0.913648289  
2,0.9737900994,0.5833710282\O,1.1685563676,1.8004321137,1.4576412113\N  
,1.872824084,0.3824106815,-0.2033806433\C,3.2643738188,0.5663076841,-0.  
.0798138586\C,3.8364083037,1.773013379,0.337372088\C,5.2228564272,1.88  
94930284,0.4004095892\C,6.0502919181,0.8296220536,0.0368434979\C,5.475  
3150793,-0.3637431973,-0.3969963297\C,4.0928235462,-0.4985201989,-0.45  
14588849\H,-4.8812907172,1.6995250638,2.7850611577\H,-4.5869330778,-0.  
4620051888,1.581990458\H,-3.0206468549,3.3472284271,2.798138954\H,-0.9  
048407147,2.8580018828,1.6355755705\H,-2.4498000796,-0.9691765603,0.44  
83497046\H,-0.4568488642,-0.2249121239,-0.3567848174\H,1.5932828524,-0.  
.4180584042,-0.7608885883\H,3.205212554,2.6107942296,0.6006744988\H,5.  
6563670699,2.8295030547,0.7281788571\H,7.1292292124,0.9335343958,0.085  
4894951\H,6.1030576627,-1.1994153704,-0.6904179334\H,3.6430007526,-1.4  
310321101,-0.7817998477\Version=ES64L-G09RevE.01\State=1-A\HF=-687.09  
20097\RMSE=8.609e-09\RMSEF=8.252e-06\Dipole=-0.46888,-1.8405548,-1.5218  
801\Quadrupole=4.8619348,2.5194511,-7.3813859,1.2838995,-2.3038964,6.4  
049269\PG=C01 [X(C13H12N2O1)]\@

#### 10\_anion.M062X\_6-31pGd\_opt

\1\GINC-R4490\FOpt\RM062X\Gen\C12H11F6N2O1(1-)\ROOT\31-Oct-2018\0\#\#  
M062X\Gen 6D SCF=Tight INT(grid=ultrafine) OPT IOP(2/17=4) maxdisk=268  
4354560\34TFM\_a1.M062X\_6-31pGd\_opt\1,\1\C,-1.8624178357,1.970199117,  
-0.1307311292\C,-0.4890999674,1.3383561445,-0.3508283115\C,0.617570300  
6.2.1065324226,0.3700878655\N,1.9113751292,1.5012681828,0.1769034878\C  
,3.0704216987,2.291350044,0.0905569379\O,2.9563064181,3.4970414922,-0.  
.1859752089\N,4.1789131227,1.5460475898,0.3238660967\C,5.4171791225,2.  
0774039597,0.2231742137\C,5.7764408536,3.4115330864,-0.152954121\C,6.5  
095077022,1.2146440759,0.5168972519\C,7.8228526593,1.6331895623,0.4539  
841122\C,8.1613687162,2.9444193948,0.0929516461\C,7.0999022804,3.81946  
07779,-0.2186843585\H,-2.6514558186,1.491406885,-0.6537556046\H,-1.87  
654444173,3.0043099849,-0.4939723694\H,-2.118902634,1.920417532,0.9352  
699944\H,-0.246832434,1.3060682081,-1.4195044285\H,-0.5000763149,0.296  
5844628,-0.0004878607\H,0.3589155781,2.192756126,1.4417891861\H,0.6916  
206014,3.1247384647,-0.0232863526\H,2.0849642994,0.6083224548,0.620273  
6287\H,4.9828824316,4.1056725031,-0.3905168714\H,6.2709300551,0.193739  
9995,0.8010770352\H,8.6168754499,0.9325932489,0.6937746622\C,7.3491908  
836,5.2582296929,-0.5976983736\C,9.6076419544,3.3069243043,0.017915880  
2\F,9.8937817736,4.5205915693,0.5348338045\F,10.108361392,3.3152728939  
-1.243659188\F,10.3823060422,2.4248938378,0.686352852\F,6.2865804828  
,5.8315762958,-1.1899377938\F,8.3780077729,5.3988077465,-1.4607685337\  
F,7.6399827259,6.0329699146,0.4715554172\Version=ES64L-G09RevE.01\Sta  
te=1-A\HF=-1247.3861076\RMSE=2.988e-09\RMSEF=1.678e-05\Dipole=-0.152904  
4,-0.4779047,0.2562211\Quadrupole=-18.8059814,6.4764512,12.3295302,-5.  
6565606,-0.5539205,-0.0325575\PG=C01 [X(C12H11F6N2O1)]\@

#### 10.M062X\_6-31pGd\_opt

\1\GINC-R3925\FOpt\RM062X\Gen\C12H12F6N2O1\ROOT\30-Oct-2018\0\#\# M062  
X\Gen 6D SCF=Tight INT(grid=ultrafine) OPT IOP(2/17=4) maxdisk=2684354  
560\34TFM.M062X\_6-31pGd\_opt\0,\1\C,-1.9142136395,1.8711942098,-0.0275  
844978\C,-0.5417488004,1.216713799,0.1131114462\C,0.5809773684,2.21545  
97893,-0.1356781701\N,1.8804491043,1.5683066565,0.0039888146\C,3.00978  
28851,2.3477908737,0.041503696\O,2.977515991,3.5638645288,0.087170474  
\N,4.1893512042,1.6052101934,0.0563023624\C,5.4969805011,2.0935978519,  
0.0825155847\C,5.8212567678,3.4442076695,-0.1110518889\C,6.5300867167,  
1.1733125295,0.2863752566\C,7.8522954474,1.5892683813,0.3019080976\C,8  
.1867817461,2.9288560103,0.1161105135\C,7.1510078933,3.850738753,-0.09  
83903419\H,-2.7155744354,1.1498014753,0.1538387042\H,-2.0534246679,2.2  
82487243,-1.0329565964\H,-2.0313685835,2.6910431882,0.6887605946\H,-0.  
4584587075,0.3841326756,-0.5994702719\H,-0.4243333885,0.7912777056,1.1  
167790788\H,0.5419403555,3.0293300585,0.59322875\H,0.4795579367,2.6696  
572443,-1.131483024\H,1.9588769189,0.6355686214,-0.382533685\H,4.09937  
32928,0.6111740735,0.2206890705\H,5.0338426688,4.1675364793,-0.2666320  
837\H,6.2991949496,0.1215039288,0.436319671\H,8.6382140384,0.86134785  
8,0.4683179924\C,7.4095718742,5.3323001891,-0.2904360365\C,9.651524078  
9.3.2964436152,0.1252015534\F,9.8967178293,4.4236407267,0.8063022357\F  
,10.1438679761,3.4582195932,-1.1148004293\F,10.3872557431,2.3260308127  
0.7015603525\F,6.3498709059,5.9499580785,-0.835089734\F,8.4525225566,  
5.5612473923,-1.1011368576\F,7.6588154723,5.9476777947,0.8764893682\N  
ersion=ES64L-G09RevE.01\State=1-A\HF=-1247.9178435\RMSE=7.521e-09\RMSEF  
=4.946e-06\Dipole=-2.2138725,-2.8311815,-0.0711439\Quadrupole=1.094665  
8,3.8342639,-4.9289297,5.3666069,2.0775385,0.1281928\PG=C01 [X(C12H12F  
6N2O1)]\@

#### 10\_anion.M062X\_6-31pGd\_opt\_water

\1\GINC-R3743\FOpt\RM062X\Gen\C12H11F6N2O1(1-)\ROOT\30-Oct-2018\0\#\#  
M062X\Gen 6D SCF=Tight INT(grid=ultrafine) OPT IOP(2/17=4) SCRF=(SMD,S  
olvent=h2o) maxdisk=2684354560\34TFM\_a1.M062X\_6-31pGd\_opt\_water\1,1  
\C,-1.8638987153,1.8791190512,0.1634242953\C,-0.5154596909,1.318515945  
4,-0.2783234777\C,0.627679068,2.2387590968,0.1241037201\N,1.9083089538  
,1.6812763673,-0.2903598941\C,3.0863917179,2.3254112726,0.0454761955\O  
,3.0312036189,3.5504275536,0.3512155163\N,4.170689325,1.5256141984,0.0  
193409691\C,5.4302234462,2.0539190672,0.0785657559\C,5.8036790982,3.37  
44859959,-0.2938500352\C,6.4877514743,1.1986854003,0.4676075585\C,7.80  
21860186,1.6289683541,0.5155991899\C,8.1523889505,2.9374570237,0.16886  
5529\C,7.1238702885,3.7989045367,-0.2567952664\H,-2.6833939368,1.21623  
8081,-0.1305510669\H,-2.0463074109,2.8606948882,-0.2883725546\H,-1.901  
3763873,1.9982662099,1.2520618676\H,-0.5036385479,1.182549064,-1.36667  
04774\H,-0.3586034666,0.329091415,0.170689544\H,0.6051448095,2.4014298  
408,1.2124994781\H,0.4958836898,3.2170464016,-0.3491145697\H,1.9700255  
81,0.6693499212,-0.2560022823\H,5.0389913111,4.0601351388,-0.631494102  
2\H,6.2500005971,0.1746463512,0.7409983086\H,8.5743324474,0.9356390223  
,0.8334285633\C,7.3916472096,5.2272528824,-0.6622242311\C,9.5969433127  
,3.325155481,0.2328597612\F,9.7952885325,4.5612798694,0.7373275561\F,1  
0.2112504088,3.3112133328,-0.9744434033\F,10.3078777245,2.4848637567,1  
.0103944047\F,6.3828016949,5.7545468736,-1.3774144225\F,8.4972040306,5  
.3537125496,-1.4218280628\F,7.5594648464,6.0420250572,0.4015156331\Ve  
rsion=ES64L-G09RevE.01\State=1-A\HF=-1247.4599207\RMSE=5.094e-09\RMSEF=  
5.620e-06\Dipole=0.033243,-1.2566623,-0.0777881\Quadrupole=-8.9732547  
,3.6019509,5.3713038,-1.2792175,1.9572414,-1.9975859\PG=C01 [X(C12H11F  
6N2O1)]\@

#### 10.M062X\_6-31pGd\_opt\_water

\1\GINC-R3724\FOpt\RM062X\Gen\C12H12F6N2O1\ROOT\30-Oct-2018\0\#\# M062  
X\Gen 6D SCF=Tight INT(grid=ultrafine) OPT IOP(2/17=4) SCRF=(SMD,Solve  
nt=h2o) maxdisk=2684354560\34TFM.M062X\_6-31pGd\_opt\_water\0,\1\C,-1.91  
64674437,1.8389407388,-0.028454318\C,-0.5315246213,1.2079429317,0.0708  
834571\C,0.559553151,2.2636376158,-0.0204958431\N,1.8743572729,1.63943  
37213,0.064468453\C,3.0006998857,2.3785808433,0.0230195177\O,2.9806994  
912,3.6156699054,-0.0539617999\N,4.1739849385,1.6461560428,0.079727023  
1\C,5.4824181469,2.1197701026,0.0836385362\C,5.8337568497,3.4533587525  
-0.1770356434\C,6.5006470703,1.1925949115,0.3415585774\C,7.8282736645  
,1.5876625998,0.352928955\C,8.1867643983,2.9135530543,0.1123252973\C,  
7.1693048376,3.8393506887,-0.1657997277\H,-2.6993126372,1.0779492332,0.  
0480847274\H,-2.0397641319,2.3643610142,-0.9818238528\H,-2.0761748699  
,2.5621607122,0.7788014659\H,-0.3943868466,0.4761575421,-0.7347908\H,-  
0.4319176263,0.6675770258,1.0201041847\H,0.4518192078,2.9895637076,0.7  
933282054\H,0.4755306871,2.8128360689,-0.9660361181\H,1.9296848836,0.6  
270407672,0.0925526458\H,4.0796450368,0.2427678163,0.2084205123\H,5.06  
57666153,4.1807338227,-0.3928782925\H,6.645295921,0.1551104155,0.5383  
997047\H,8.5954978787,0.8499616229,0.5610050922\C,7.4529799749,5.29921  
53949,-0.4346264798\C,9.6501402263,3.2617742499,0.1246090455\F,9.90482  
99676,4.4322557116,0.7393887998\F,10.1760764169,3.3555498026,-1.114996  
0047\F,10.3756065196,2.3297324503,0.7674839835\F,6.4164731532,5.913569  
6542,-1.027179149\F,8.5141141855,5.4770892135,-1.2418237021\F,7.702507  
6646,5.9868418657,0.6974095993\Version=ES64L-G09RevE.01\State=1-A\HF=  
-1247.937026\RMSE=4.094e-09\RMSEF=5.886e-06\Dipole=-2.7981014,-4.472614  
5,0.4009785\Quadrupole=-0.3475347,6.8620942,-6.5145595,9.765534,0.2654  
655,-1.7842593\PG=C01 [X(C12H12F6N2O1)]\@

#### 6.M062X\_opt

\1\GINC-R4416\FOpt\RM062X\Gen\C11H12ClF3N2O1\ROOT\12-Jul-2018\0\#\# M  
062X\Gen 6D SCF=Tight INT(grid=ultrafine) OPT IOP(2/17=4) Freq=Norramax  
maxdisk=2147483648\varyl\_urea\_CI\_CF3.M062X\_opt\0,\1\C,-4.221699984,3.  
0921246846,-0.7877862884\C,-4.0860658285,1.7210908982,-0.594821155\C,  
-2.9206125605,1.1692311931,-0.0883323545\C,-1.8376399534,1.9975987313,  
0.2435210443\C,-1.9485226508,3.380033916,0.0595955416\C,-3.1375662396,  
3.893914998,-0.4526744958\H,-5.1379710026,3.5111662118,-1.1866389109\N  
,-0.6844809784,1.3686914757,0.7256437899\C,0.4525478734,1.9801669072,1.  
2448969887\N,1.422272427,1.0856900858,1.6291910956\O,0.5725351375,3.1  
850372104,1.3755688755\C,2.7152587543,1.5963802709,2.0691798224\C,3.54  
47831769,0.4820712492,2.6937989154\C,4.9045272736,0.9933818727,3.16447  
3032\H,-2.8538695307,0.0929563222,0.0451160945\H,-1.1262277945,4.03440  
2607,0.3163437809\H,-0.7540370686,0.3660221024,0.8384310167\H,1.430764  
4765,0.1757216212,1.1847624924\H,2.5224912071,2.3882236922,2.797877339  
2\H,3.2569741948,2.0559763393,1.2302380227\H,3.6903518926,-0.323801297



7,1.960787145\H,2.9881053282,0.0520780117,3.5348303083\H,5.4797650977, 1.408345654,2.3300298723\H,5.4950635542,0.1894626435,3.6122965998\H,4. 7867336757,1.7821757665,3.91481177\Cl,-5.4108235508,0.6667124053,-1.00 11954293\Cl,-3.2363338903,5.3887637593,-0.6121811063\F,-3.2919853725,6. 0093421806,0.5799395755\F,-4.3306088736,5.7558521014,-1.2989301101\F,- 2.1715687763,5.8909663863,-1.2597732725\Version=ES64L-G09RevE.01\Stat e=-1-A\HF=-1370.5372523\RMSD=3.304e-09\RMSF=3.794e-06\Dipole=1.2919467, -2.3044984,0.3422649\Quadrupole=4.2697816,-0.6453867,-3.6243949,-6.920 8459,2.1221183,-1.89227\PG=C01 [X(C11H12Cl1F3N2O1)]\@

#### 6\_anion.M062X.opt

I\1\GINC-R4500\FOpt\RM062X\Gen\C11H11Cl1F3N2O1(1-)\ROOT\12-Jul-2018\0 \# M062X\Gen 6D SCF=Tight INT(grid=ultrafine) OPT IOP(2/17=4) maxdisk= 2147483648\vary\_l\_urea\_Cl\_CF3\_a1.M062X\1,1\Cl,-4.2078193452,3.07544780 8,-0.7209122552\Cl,-4.019496298,1.6989914778,-0.6279649118\Cl,-2.8327729 47,1.1292365573,-0.2174438211\Cl,-1.7073705434,1.9291698184,0.138340554 5\Cl,-1.8921819107,3.341371638,0.0463565829\Cl,-3.1107646388,3.864853761 3,-0.3687568555\H,-5.150907828,3.5016074526,-1.0400861253\N,-0.5990960 968,1.2503760372,0.5285329506\Cl,-0.0363242\Quadrupole=3.3949249,1. 5216369123,1.0021104107,1.314129151\O,0.7988488656,3.1191988494,0 .8532068721\Cl,2.9121661521,1.3839135138,1.2961515377\Cl,3.7096958683,0 .6816481781,2.3933726828\Cl,5.18659633,1.0714853777,2.3684038495\H,-2.72 66995432,0.0514021099,-0.1521429913\H,-1.0688360315,3.9929258671,0.307 4204484\H,1.3021765559,0.0470003491,1.0596571124\H,2.9378184423,2.4678 64996,1.4416188284\H,3.3867272695,1.1805094874,0.3175356547\H,3.612678 1088,-0.4071896007,2.2776327742\H,3.2611819209,0.9337490768,3.36150251 03\H,5.6465980446,0.8076766306,1.4085177697\H,5.7528934208,0.569476414 6,3.1604333952\H,5.3048216781,2.1528775343,2.5036020498\Cl,-5.37041937 44,0.6430262389,-1.0483709736\Cl,-3.2337352973,5.3526258951,-0.51381429 69\F,-2.5447473632,6.0360237999,0.4185922408\F,-4.5155414055,5.7816286 527,-0.4317978606\F,-2.7792159756,5.7949244496,-1.7114120966\Version= ES64L-G09RevE.01\State=1-A\HF=-1370.0066588\RMSD=7.805e-09\RMSF=4.309e -06\Dipole=0.3426461,-0.3168947,-0.0363242\Quadrupole=8.9295447,0.811 654,8.1178907,-0.7313494,-7.6829357,1.7799217\PG=C01 [X(C11H11Cl1F3N2O 1)]\@

#### 6\_anion.M062X.SMD.h2o.opt

I\1\GINC-R3718\FOpt\RM062X\Gen\C11H11Cl1F3N2O1(1-)\ROOT\10-Jul-2018\0 \# M062X\Gen 6D SCF=Tight INT(grid=ultrafine) OPT IOP(2/17=4) Freq=Nor aman SCRF=(SMD,Solvent=h2o) maxdisk=2147483648\vary\_l\_urea\_Cl\_CF3\_a1.M0 62X.SMD.h2o.opt\1,1\Cl,-4.1723372843,3.028692707,-0.8533404248\Cl,-3.9 675619341,1.6562629014,-0.7325508152\Cl,-2.8071170616,1.1152153207,-0.2 101269603\Cl,-1.7457418136,1.9450025395,0.232915119\Cl,-1.9494042561,3. 3413671118,0.121875994\Cl,-3.1348810107,3.8433128968,-0.4074996966\H,-5 .088855596,3.4324640419,-1.2668717574\N,-0.6582040729,1.3184854922,0.7 92721325\Cl,0.5299554007,1.9425242459,0.84939317\N,1.4654139386,1.3010 341001,1.6492095872\O,0.880665997,0.880665997,0.008686153,0.2649757165\Cl,2.886293 9036,1.5556258005,1.4488838154\Cl,3.7240248839,0.6746942322,2.364471933 2\Cl,5.2165216126,0.9165371972,2.1604960669\H,-2.694938181,0.0380483618 ,-0.1316437723\H,-1.1842253575,4.0277008558,0.4631024707\H,1.230282865 4,0.3350326678,1.8514160893\H,3.0925882623,2.6089939635,1.6635154973\H ,3.1745680366,1.377706082,0.401416159\H,3.48800155,-0.3792743981,2.167 5646873\H,3.4503593003,0.8749628688,3.4076349393\H,5.5119473945,0.6971 665964,1.1283399085\H,5.8140472499,0.282886282,2.8230011627\H,5.475681 5953,1.9606084953,2.3694145649\Cl,-5.2393100975,-0.57112246345,-1.266674 955\Cl,-3.270978409,5.3349463347,-0.4953284036\F,-3.0955631722,5.934679 9189,0.7021641424\F,-4.4727223623,5.7307050062,-0.9500453343\F,-2.3500 613817,5.882645128,-1.3191410297\Version=ES64L-G09RevE.01\State=1-A\H F=-1370.0780633\RMSD=3.772e-09\RMSF=5.176e-06\Dipole=-0.202,-0.8007281 ,0.3197621\Quadrupole=-1.7659361,-1.6069133,3.3728494,-5.6919629,0.669 9411,0.2219294\PG=C01 [X(C11H11Cl1F3N2O1)]\@

#### 6.M062X.SMD.h2o.opt

I\1\GINC-R4493\FOpt\RM062X\Gen\C11H12Cl1F3N2O1\ROOT\12-Jul-2018\0\# M 062X\Gen 6D SCF=Tight INT(grid=ultrafine) OPT IOP(2/17=4) Freq=Noraman SCRF=(SMD,Solvent=h2o) maxdisk=2147483648\vary\_l\_urea\_Cl\_CF3\_a1.M062X.SMD .h2o.opt\0,1\Cl,-4.2320811711,3.0839767232,-0.7844623646\Cl,-4.07831401 28,1.7174108925,-0.566985614\Cl,-2.908898396,1.174906289,-0.0640005041 \Cl,-1.8236724454,2.0149367873,0.2411808117\Cl,-1.9463457573,3.392129601 8,0.027279577\Cl,-3.1459110193,3.8924734279,-0.4768194566\H,-5.15727554 81,3.4901184544,-1.1765097098\N,-0.6710785918,1.394347711,0.7254464162 \Cl,0.452369458,1.9951716602,1.2603693081\N,1.413783624,1.1383877891,1. 6628358232\O,0.5706696418,3.2243843827,1.374183224\Cl,2.6816203312,1.6

286887429,2.19065385\Cl,3.5699342316,0.4643256051,2.6010242534\Cl,4.9070 343393,0.9593185171,3.1428098439\H,-2.8258113422,0.1036013792,0.095503 0662\H,-1.1254105081,4.0614644742,0.2442169958\H,-0.702152769,0.379348 4436,0.748913823\H,1.3167037726,0.1445368523,1.4857012287\H,2.48410639 11,2.2741567615,3.053484901\H,3.1862984242,2.2386733194,1.4312063663\H ,3.7350476291,-0.1875714495,1.7341991586\H,3.0536691776,-0.1329220353, 3.3622998882\H,5.4455425173,1.5396905788,2.3855819243\H,5.5437201394,0 .1212186764,3.4410628537\H,4.7610286382,1.6008019777,4.0188634651\Cl,- 5.4098333129,0.6505022566,-0.9381760578\Cl,-3.232487267,5.3774890399,- 0.6875112472\F,-3.061579394,6.0597168368,0.463859427\F,-4.4116237021,5 .7659137405,-1.1973381966\F,-2.277980187,5.8225825634,-1.5298722058\ Version=ES64L-G09RevE.01\State=1-A\HF=-1370.5562207\RMSD=3.0236e-09\RMS F=2.834e-06\Dipole=1.43011,-3.6477761,0.5085546\Quadrupole=3.3949249,1 .1399976,-4.5349225,-10.9746854,2.7850249,-4.2831915\PG=C01 [X(C11H12C l1F3N2O1)]\@

#### TCC.M062X\_6-31pGd\_opt

I\1\GINC-R125\FOpt\RM062X\Gen\C13H9Cl3N2O1\ROOT\08-Oct-2018\0\# M062X /Gen 6D SCF=Tight INT(grid=ultrafine) OPT IOP(2/17=4)\triclofen.M062X \_6-31pGd\_opt\0,1\Cl,-0.9957927212,2.4699123093,-0.0324389034\Cl,-0.6509 784201,1.131179623,-0.2223383942\Cl,0.6812032046,0.7402802654,-0.169523 4791\Cl,1.6929026453,1.6735574678,0.0771380114\Cl,1.3520978436,3.0181255 12,0.2698151708\Cl,0.0156552106,3.3948566766,0.2110123207\Cl,-1.8566086 364,-0.0757497906,-0.5306518862\Cl,-2.6446957385,2.999346261,-0.092783 1822\N,3.0072109875,1.1791953514,0.1321393957\Cl,4.175810027,1.91859473 19,0.2148400127\O,4.2030321959,3.134582627,0.2448827758\N,5.302240373 4,1.1207076117,0.258448785\H,0.9199271033,-0.3084205719,-0.3243330968\ H,2.1193395087,3.7552081632,0.4567177356\H,-0.2543777223,4.4354618946, 0.3583931393\H,3.0891211786,0.1798336341,0.0027739994\H,5.1702660266,0 .1214323374,0.3376470832\Cl,6.6437588855,1.5426020152,0.3427749305\Cl,7 .0522239227,2.8741506579,0.2058287633\Cl,8.4065439935,3.1898525635,0.287 203809\Cl,9.35123112,2.1935344769,0.5001449791\Cl,8.9564605537,0.8666070 956,0.6351361043\Cl,7.6071173395,0.5489326976,0.557570018\Cl,11.0424439 677,2.6053975729,0.5989994887\H,6.3216079277,3.653733306,0.0436595214\ H,8.7254397584,4.221773133,0.1826879562\H,9.6960307808,0.0905441888,0. 8016318392\H,7.3004286837,-0.4891254469,0.6664231009\Version=ES64L-G0 9RevE.01\State=1-A\HF=-2065.7977912\RMSD=6.783e-09\RMSF=2.281e-06\Dipo le=0.3955098,-1.4106802,0.0598324\Quadrupole=-17.6222381,15.8408808,1. 7813573,-6.2514299,-1.2729907,-0.4829184\PG=C01 [X(C13H9Cl3N2O1)]\@

#### TCC\_anion.M062X\_6-31pGd\_opt

I\1\GINC-R119\FOpt\RM062X\Gen\C13H8Cl3N2O1(1-)\ROOT\08-Oct-2018\0\# M 062X\Gen 6D SCF=Tight INT(grid=ultrafine) OPT IOP(2/17=4)\triclofen\_a 2e1.M062X\_6-31pGd\_opt\1,1\Cl,-0.9705460908,2.4569196774,-0.07286812\ Cl,-0.6075818623,1.1086812086,-0.0851527372\Cl,0.7222464258,0.732683179 ,0.0160190627\Cl,1.7726273276,1.682402604,0.0697817823\Cl,1.3821358082,3 .0496202621,0.080926859\Cl,0.0423743721,3.4092319935,0.0107902753\Cl,-1 .8304798783,-0.1431390434,-0.1886628879\Cl,-2.6402769806,2.9712577544, -0.1586978467\N,3.0372826264,1.1656476796,0.1314602605\Cl,4.1042943359, 1.9692613718,0.2145961815\O,4.2097127429,3.2064327134,0.2517190848\N,5 .2852497297,1.1736716394,0.2637961394\H,0.9872340987,-0.3193973419,-0. 0266846189\H,2.1459468717,3.8122199386,1.450925322\H,-0.2353668696,4. 4599590424,0.0206466901\H,5.083686443,0.183398629,0.2271889259\Cl,6.603 0655156,1.5546310939,0.3513479951\Cl,7.0365602389,2.8961184624,0.410718 4963\Cl,8.3928177789,3.1920516388,0.498376496\Cl,3.9402517611,2.1747535 903,0.528805644\Cl,8.9396984504,0.8449643567,0.471652158\H,7.587201999 5,0.543834028,0.384105357\Cl,11.0503885873,2.5673709046,0.6398266479\H ,6.2946286173,3.68285231,0.3866447068\H,8.7146818718,4.2284238891,0.54 34879275\H,9.6790579985,0.0500027154,0.4953624764\H,7.2768380803,-0.49 77442969,0.3395274758\Version=ES64L-G09RevE.01\State=1-A\HF=-2065.274 4337\RMSD=7.283e-09\RMSF=1.865e-05\Dipole=-0.9923403,-0.5030691,0.04597 0\Quadrupole=-47.5449442,25.9728366,21.5721076,-7.9542639,-4.2953092, -0.3654248\PG=C01 [X(C13H8Cl3N2O1)]\@

#### TCC.M062X\_6-31pGd\_opt\_water

I\1\GINC-R158\FOpt\RM062X\Gen\C13H9Cl3N2O1\ROOT\08-Oct-2018\0\# M062X /Gen 6D SCF=Tight INT(grid=ultrafine) OPT IOP(2/17=4) SCRF=(SMD,Solven t=h2o)\triclofen.M062X\_6-31pGd\_opt\_water\0,1\Cl,-0.9494326515,2.51775 22406,0.0355259904\Cl,-0.6079013857,1.2622127917,-0.4682687761\Cl,0.7098 780051,0.8250295765,-0.4346473072\Cl,1.7084877187,1.6358631402,0.115447 9304\Cl,1.3661136684,2.889113667,0.6381570899\Cl,0.0455523971,3.1939651 33,0.5866423784\Cl,-1.8121115233,0.2151945317,-1.1591749631\Cl,-2.5892 624609,3.0948088023,-0.0007612356\N,3.00939259,1.110745457,0.15133756

4/C,4.1757694026,1.8385501519,0.2015574316/O,4.2051424989,3.0690972829  
0.2374669034/N,5.2999253746,1.0537028785,0.2064366693/H,0.9607832471,  
-0.152216536,-0.837451386/H,2.1157209272,3.5229639169,1.0907429494/H,  
0.2187441593,4.2911563933,0.9914839762/H,3.0845548998,0.1175842797,-0.  
0502300021/H,5.17334465,0.0571741919,0.3563546509/C,6.6287479027,1.509  
9609112,0.2961058753/C,7.0473431113,2.7466379431,-0.2070840614/C,8.386  
597084,3.118839224,-0.110167326/C,9.3030269592,2.2513797909,0.47210503  
42/C,8.9067504873,1.0099664939,0.9591720215/C,7.5680863817,0.646398273  
1,0.872811597/C,10.9851526157,2.7234751013,0.5877240063/H,6.341549431  
4,3.4155367289,-0.6817740018/H,8.7094727014,4.0793263491,-0.4993155891  
/H,9.6288422735,0.3351554197,1.4074621607/H,7.246857853,-0.3187476033,  
1.2561204196/Version=ES64L-G09RevE.01|State=1-A|HF=-2065.82034|RMSD=8  
.425e-09|RMSF=1.196e-05|Dipole=0.5557551,-2.5875843,0.2552049|Quadrupo  
le=-24.9784433,19.0266247,5.9518186,-8.546733,-2.4125217,-1.7399105|PG  
=C01[X(C13H9Cl3N2O1)]/@

### TCC\_anion.M062X\_6-31pGd\_opt\_water

1\1\GINC-R123\FOpt\RM062X\GenC13H8Cl3N2O1(1-)\ROOT\08-Oct-2018\0\# M  
062X\Gen 6D SCF=Tight INT(grid=ultrafine) OPT IOP(2/17=4) SCRF=(SMD,So  
lvent=h2o)\triflofen\_a2cl.M062X\_6-31pGd\_opt\_water\1,1\C,0.94135955  
29,2.4653911748,-0.0013830959/C,-0.5739467145,1.2061139876,-0.47549245  
98/C,0.7445615752,0.7771852952,-0.4027418517/C,1.7580815972,1.59267901  
69,0.1421612536/C,1.3635422664,2.8618496393,0.6261832643/C,0.042261519  
7.3.2822339841,0.5537348716/C,1.7609720327,0.1327874055,-1.173581618  
5/C,1.2.588987618,3.0310342762,-0.0762354259/N,3.0267364631,1.05186776  
9,0.2382001774/C,4.0915928037,1.8536991814,0.706589775/C,1.1481219406  
.3.0757143371,-0.1297265732/N,5.2792047397,1.1642786382,0.4501309039/H  
.1.0041680066,-0.2095407039,-0.774189721/H,2.0975485679,3.5157580154,1  
.080897338/H,-0.23809412,4.2581852677,0.9394775504/H,5.1459712976,0.18  
6332798,0.6796760964/C,6.6011248034,1.5922440229,0.3971579737/C,7.0166  
891123,2.8925259931,0.0633967469/C,8.3736485005,3.2138743032,0.0427184  
388/C,9.3248392818,2.2512427846,0.3523962877/C,8.9381655436,0.95606492  
03,0.6864545535/C,7.5882075894,0.6359691814,0.706589775/C,1.1.0286449  
635,2.6669336881,0.3224609932/H,6.2889133803,3.6522464343,-0.180918982  
8/H,8.6801865256,4.222496518,-0.2179072033/H,9.6806346422,0.2019572792  
.0.9287390364/H,7.2842449177,-0.3749241316,0.9666227126/Version=ES64L  
-G09RevE.01|State=1-A|HF=-2065.345463|RMSD=7.221e-09|RMSF=6.865e-06|Di  
pole=1.2025205,-0.8381855,0.6957866|Quadrupole=-34.2347576,20.0296787,  
14.2050789,-10.3783831,-2.7113801,-0.3123602|PG=C01[X(C13H8Cl3N2O1)]  
/@

### 3.M062X\_6-31pGd\_opt

1\1\GINC-R371\FOpt\RM062X\GenC10H13N3O3\ROOT\05-Feb-2019\0\# M062X/  
Gen 6D SCF=Tight INT(grid=ultrafine) OPT IOP(2/17=4) maxdisk=214748364  
8\3Nitro.M062X\_6-31pGd\_opt\0,1\C,11.976345989,0.0061280099,-7.425520  
7149/C,10.8599533005,-0.2924077031,-6.4272884814/C,10.5728612723,0.908  
0702491,-5.5349502823/N,9.5095481378,0.5967348862,-4.5866521223/C,9.25  
30092586,1.4844080597,-3.5681185861/O,9.952752698,2.4537198739,-3.3394  
170983/N,8.1350171797,1.1430021223,-2.812527081/C,7.6333355535,1.8305  
06074,-1.6997216586/C,8.0070456154,3.1400451719,-1.3765148363/C,6.6863  
913503,1.1702845688,-0.9025678979/C,6.1170359542,1.7948255666,0.200292  
6271/C,6.4784965145,3.0946293002,0.5419748871/C,7.4160242875,3.7239169  
032,-0.2643959348/H,12.1769164426,-0.8587165088,-8.0638275071/H,12.905  
4839288,0.2637654957,-6.906494411/H,11.13117909462,-1.1477822545,-5.79  
74928625/H,9.947339418,-0.573004647,-6.9169823877,10.3074211527,1.7  
851039085,-6.1422505364/H,11.4592970175,1.177666817,-4.9545682245/H,8.  
7290288318,0.0656375877,-4.9536922562/H,8.7385016168,3.6814458108,-1.9  
596330923/H,6.3946268677,0.1526370683,-1.1522600875/H,5.3875463395,1.2  
608258081,0.8005345069/N,7.8096120773,5.1086270685,0.0756222932/H,6.05  
76182961,3.6087303978,1.3966338025/O,8.6108307305,5.6654731589,-0.6502  
661505/O,7.3020524464,5.6082646417,1.0648925181/H,11.7105991917,0.8479  
597051,-8.0736411785/H,7.771797585,0.2075823377,-2.9390657686/Version  
=ES64L-G09RevE.01|State=1-A|HF=-778.4465485|RMSD=5.446e-09|RMSF=3.616e  
-06|Dipole=-0.9115699,-3.0607712,-1.4438158|Quadrupole=2.5712875,-6.69  
18327,4.1205452,2.2393257,-4.2671613,-3.3203394|PG=C01[X(C10H13N3O3)]  
/@

### 3.M062X\_6-31pGd\_opt\_water

1\1\GINC-R3710\FOpt\RM062X\GenC10H13N3O3\ROOT\05-Feb-2019\0\# M062X/  
Gen 6D SCF=Tight INT(grid=ultrafine) OPT IOP(2/17=4) SCRF=(SMD,Solvent  
=h2o) maxdisk=2147483648\3Nitro.M062X\_6-31pGd\_opt\_water\0,1\C,11.958  
3662522,-0.0398805739,-7.4267135578/C,10.7522815818,-0.2281169012,-6.5  
123191543/C,10.665179954,0.8886003743,-5.4829591982/N,9.5112063584,0.6

865335269,-4.6151687795/C,9.237628695,1.5397411494,-3.6057799257/O,9.8  
92789743,2.576605003,-3.4186311158/N,8.1711914219,1.170894275,-2.80966  
48645/C,7.6579542565,1.8504793734,-1.7021361925/C,7.9662163512,3.17882  
04266,-1.3952138614/C,6.7579391537,1.1496515703,-0.8803144671/C,6.1806  
444095,1.7532018149,0.229101436/C,6.4828829829,3.0723550146,0.56008911  
84/C,7.3712003108,3.7405161619,-0.2703208518/H,12.0176881047,-0.842921  
909,-8.1672437787/H,12.8903647103,-0.0421590674,-6.8508852079/H,10.822  
3478404,-1.1922777084,-5.9936625521/H,9.8299782281,-0.2451620512,-7.10  
55760172/H,10.5724272987,1.8578454845,-5.9855736369/H,11.5801635397,0.  
9165315714,-4.8785712962/H,8.9906309808,-0.1799058751,-4.6996858865/H,  
8.6379868926,3.7592609009,-2.0089785181/H,6.5151154162,0.1182575982,-1  
.1229258904/H,5.4909959841,1.1879936407,0.8471252331/N,7.7038298848,5.  
1340095056,0.0465781156/H,6.0489832865,3.5570355363,1.4256926132/O,8.5  
202131906,5.7137359645,-0.6540116658/O,7.1486108854,5.6592067101,1.000  
871033/H,11.8965588424,0.9121190607,-7.9653109286/H,7.7669034439,0.255  
1095229,-2.9800502023/Version=ES64L-G09RevE.01|State=1-A|HF=-778.4707  
003|RMSD=4.352e-09|RMSF=4.333e-06|Dipole=-1.3828861,-5.0146593,-1.5740  
941|Quadrupole=2.0411232,-5.8243226,3.7831994,2.5324333,-5.5294194,-3.  
8730558|PG=C01[X(C10H13N3O3)]/@

### 3\_anion.M062X\_6-31pGd\_opt

1\1\GINC-R3718\FOpt\RM062X\GenC10H12N3O3(1-)\ROOT\05-Feb-2019\0\# M0  
62X\Gen 6D SCF=Tight INT(grid=ultrafine) OPT IOP(2/17=4) maxdisk=21474  
83648\3Nitro\_a1.M062X\_6-31pGd\_opt\1,1\C,11.9291909684,0.1126843228,  
-7.4447969266/C,10.6259036237,-0.0063046518,-6.6566253178/C,10.7336830  
377,0.6242179617,-5.2694452404/N,9.5064967348,0.4942040249,-4.52290803  
94/C,9.1649685559,1.4650467924,-3.5547969746/O,9.6674964826,2.59912017  
54,-3.646623548/N,8.2886674523,0.9662574119,-2.6581799756/C,7.76385076  
44,1.7519806438,-1.6798901892/C,7.9930906661,3.1411527463,-1.450794116  
/C,6.869492532,1.1156290896,-0.7727643849/C,6.2521526242,1.7847863352,  
0.2730607317/C,6.4792260962,3.1438513716,0.494066205/C,7.3521971354,3.  
7711160417,-0.3918359537/H,11.8441852596,-0.3345653492,-8.441240716/H,  
12.7522085255,-0.388591653,-6.9213257494/H,10.3490607749,-1.0656033081  
-6.5575956523/H,9.8045984599,4.8817439163,-7.1944757685/H,10.93286698  
46,1.6966507577,-5.3534267916/H,11.5951810618,0.1789864897,-4.73618184  
65/H,9.2509902639,-0.4381144622,-4.2213860665/H,8.6622672708,3.6903449  
41,-2.0979084067/H,6.6838621694,0.0574553193,-0.9369689586/H,5.5783824  
149,1.242217985,0.9326313061/N,7.6096927756,5.2088261838,-0.1828579944  
/H,6.0131793706,3.6940109224,1.3006821725/O,8.3601714278,5.7886082953,  
-0.949077385/O,7.0535927083,5.7640287341,0.7592891459/H,12.211743859,  
1.1643389624,-7.5706732058/Version=ES64L-G09RevE.01|State=1-A|HF=-777  
9071289|RMSD=5.460e-09|RMSF=4.540e-06|Dipole=0.2985516,-1.7539744,-0.  
7297253|Quadrupole=7.8078705,-5.9568538,-1.8510167,2.5833081,6.4491636  
,-12.2956674|PG=C01[X(C10H12N3O3)]/@

### 3\_anion.M062X\_6-31pGd\_opt\_water

1\1\GINC-R3719\FOpt\RM062X\GenC10H12N3O3(1-)\ROOT\05-Feb-2019\0\# M0  
62X\Gen 6D SCF=Tight INT(grid=ultrafine) OPT IOP(2/17=4) SCRF=(SMD,Sol  
vent=h2o) maxdisk=2147483648\3Nitro\_a1.M062X\_6-31pGd\_opt\_water\1,1\C,  
12.0336117707,-0.0871582733,-7.2876790829/C,10.6566352053,-0.0385358  
776,-6.6324143625/C,10.6618021592,0.8399513395,-5.3897147894/N,9.34241  
16148,0.8627019248,-4.7695917893/C,9.1644564605,1.5262231235,-3.560196  
1299/O,9.9888295921,2.439164217,-3.2579484342/N,8.116550472,1.08849222  
46,-2.8475901106/C,7.6936873027,1.7862954978,-1.7373562319/C,7.8441692  
11,1.3.1761531297,-1.5284205829/C,6.970053655,1.0339653396,-0.748931608  
9/C,6.4449901642,1.6907150627,0.3812023837/C,6.6048472028,3.0593325986  
.05918283385/C,7.3039133028,3.7576218484,-0.3872739425/H,12.024402546  
6,-0.7178241666,-8.1819110076/H,12.7822164516,-0.4925184734,-6.5977241  
556/H,10.3397479877,-1.0529230803,-6.356686165/H,9.915743088,0.346438  
1525,-7.3438132064/H,10.9438463766,1.8614632473,-5.6637694847/H,11.423  
1343424,0.4738511218,-4.6836629816/H,8.8450635243,-0.0208797522,-4.812  
5090993/H,8.3567184851,3.7892282916,-2.2559710299/H,6.8284082992,0.007  
6611962,-0.8939571037/H,5.9048891097,1.0973503642,1.112910227/N,7.4770  
853168,5.2023523233,-0.2098297866/H,6.2109767825,3.5559519702,1.469469  
1806/O,8.1499999194,5.8204172054,-1.0238472008/O,6.9400702087,5.741769  
5681,0.7495689574/H,12.3601394484,0.9154156766,-7.5862308944/Version=  
ES64L-G09RevE.01|State=1-A|HF=-777.9914678|RMSD=4.559e-09|RMSF=6.478e-  
06|Dipole=-0.4003463,-2.5660174,-0.6573291|Quadrupole=3.0141413,-8.940  
824,5.9266827,1.2519374,-1.2743831,-8.9505715|PG=C01[X(C10H12N3O3)]/  
@

### 5.M062X.opt

1\1\GINC-R4420\FOpt\RM062X\GenC10H13N3O3\ROOT\16-Jul-2018\0\# M062X/  
Gen 6D SCF=Tight INT(grid=ultrafine) OPT IOP(2/17=4) SCRF=(SMD,Solvent=

Gen 6D SCF=Tight INT(grid=ultrafine) OPT IOP(2/17=4) Freq=Noraman maxdisk=2147483648\|varyl\_urea\_nitro.M062X.opt\0,1\,C,-4.128982565,3.513988 4707,-1.183629988\C,-4.1394367067,2.1380556781,-0.980631752\C,-3.03562 00123,1.5473000123,-0.391524431\N,-1.9239638653,2.3167845953,-0.00403 83317\C,-1.9358355191,3.7051896614,-0.2166303245\C,-3.0439732604,4.296 7312443,-0.8091844109\N,-0.8494364913,1.6312121575,0.5641581443\C,0.30 8824824,2.1728409354,1.1171399472\N,1.1888002006,1.2206407743,1.569444 1465\O,0.5144614668,3.3685438184,1.2209619949\C,2.4936961304,1.6435313 258,2.0637768724\C,3.2051943681,0.4848117514,2.7501874186\C,4.57461540 56,0.9040119455,3.2800831193\H,-3.0294983004,0.4724187398,-0.228228290 2\H,-1.0897004552,4.3048941219,0.0866659614\H,-0.9915740742,0.63770443 47,0.6915892694\H,1.1445721653,0.2963064929,1.1582438455\H,2.326574727 2,2.4641925997,2.7666049834\H,3.1082105742,2.0417376927,1.2439385006\H ,3.3258784696,-0.3454201641,2.0402325705\H,2.5771055313,0.1158543846,3 .5696552029\H,5.2198538338,1.2570295116,2.4686710726\H,5.0801740532,0 .0683053998,3.7714896634\H,4.4795597748,1.7152069562,4.0094514898\H,-5 .0003564541,1.5529591911,-1.2818353504\H,-3.0719931253,5.3664144182,-0.0 9817447106\N,-5.2917156323,4.1494177591,-1.8063943022\O,-5.2575694001, 5.3567293852,-1.9739154499\O,-6.2275656661,3.4325567062,-2.1221368611\ |Version=ES64L-G09RevE.01|State=1-A|HF=-778.4499459|RMSD=6.870e-09|RMS F=4.894e-06|Dipole=2.2256844,-2.5208187,1.018129|Quadrupole=-6.8461647 ,7.6056811,-0.7595163,2.5829747,-6.6148256,1.6003784|PG=C01 [X(C10H13N 3O3)]\@

#### 5\_anion.M062X.opt

1\1\GINC-R3711\FOpt\RM062X\Gen\C10H12N3O3(1-)\ROOT\30-Aug-2018\0\# M0 62X\Gen 6D NoSymm SCF=Tight INT(grid=ultrafine) OPT IOP(2/17=4) maxdis k=2147483648\|varyl\_urea\_nitro\_a1.M062X\1,1\,C,-3.7540222684,3.4086087 145,-1.4146779001\C,-4.0269121793,2.2269029926,-0.7030579476\C,-3.0701 70325,1.7062955296,0.1326612\C,-1.7840616804,2.3167479993,0.3183477455 \C,-1.5478413017,3.5224536499,-0.427182976\C,-2.5116960833,4.043133205 6,-1.265048939\N,-0.9540569382,1.6907491084,1.1717796427\C,0.30306622 37,2.1527683468,1.4131186699\N,0.9457740951,1.3725796882,2.3825881803\ O,0.9148001194,3.1176140037,0.926968275\C,2.3808238203,1.4449816074,2. 5172343104\C,3.1554714036,0.7874047437,1.3708161128\C,4.6656076263,0.9 340454123,1.5459747072\H,-3.2619597194,0.7956189531,0.6926480375\H,-0. 5929114994,4.0175581392,-0.3199984363\H,0.4944336301,0.4813895258,2.54 13711031\H,2.664408628,0.9829087817,3.4731356723\H,2.6510237946,2.5050 472975,2.567636122\H,2.8313719763,1.2567720661,0.4354549024\H,2.882430 6718,-0.2752573739,1.3139327838\H,4.9497748475,1.992386839,1.572160009 3\H,5.2178457889,0.4597893833,0.7276209426\H,5.0014387575,0.476803301, 2.485485703\H,-4.9910702929,1.7456029963,-0.8258852505\H,-2.3213170277 ,4.9544667894,-1.8222494569\N,-4.74011012747,3.9589431223,-2.2855383358 \O,-4.482501612,4.9973105439,-2.9006672732\O,-5.8246091808,3.379144633 7,-2.3985175493\|Version=ES64L-G09RevE.01|HF=-777.9200944|RMSD=7.270e- 09|RMSF=6.608e-06|Dipole=2.1984504,-1.5092109,1.1978451|Quadrupole=-13 .3477929,-6.7326777,20.0804699,33.0076316,-22.9467941,12.0709478|PG=C01 [X(C10H12N3O3)]\@

#### 5\_anion.M062X.SMD.h2o.opt

1\1\GINC-R4490\FOpt\RM062X\Gen\C10H12N3O3(1-)\ROOT\10-Jul-2018\0\# M0 62X\Gen 6D SCF=Tight INT(grid=ultrafine) OPT IOP(2/17=4) Freq=Noraman SCR F=(SMD,Solvent=h2o) maxdisk=2147483648\|varyl\_urea\_nitro\_a1.M062X.SM D.h2o.opt\1,1\,C,-4.071868236,3.5110849816,-1.214073499\C,-4.23675964 59,2.2641711875,-0.5794159616\C,-3.1566784168,1.6624049215,0.013648448 6\C,-1.8537142146,2.2621054413,0.0268476884\C,-1.7290645109,3.52688722 47,-0.6415254423\C,-2.8077072835,4.1272880321,-1.2463515847\N,-0.86172 92426,1.5580564651,0.5990200544\C,0.3287482074,2.1477219878,0.91519704 03\N,1.3628170606,1.2646691152,1.0464239995\O,0.5351783985,3.368887891 8,1.1339607576\C,2.6144032348,1.6463065059,1.6825403235\C,3.55558136,0 .4539019503,1.7705077752\C,4.8698887736,0.832293887,2.4460683428\H,-3 .2753840082,0.6991904404,0.5009104678\H,-0.7622032183,4.0103296115,-0. 688874571\H,1.1168857311,0.2817588528,1.0480448758\H,2.4239252041,2.04 58406777,2.688927714\H,3.0838827817,2.44780165,1.10162134\H,3.74903230 61,0.0712339098,0.7609349608\H,3.0658926536,-0.3518744398,2.3321388039 \H,5.3812232899,1.6259562896,1.8900602314\H,5.5451476055,-0.0267834107 ,2.503646552\H,4.6965051922,1.1935587622,3.4658275383\H,-5.2112431704, 1.7887849372,-0.5610343112\H,-2.6850923106,5.0763165842,-1.7571016974\ N,-5.175448012,4.1402028164,-1.8268965955\O,-5.0241209333,5.242683880 7,-2.3746435443\O,-6.2830608067,3.5820543446,-1.8102997074\|Version=ES 64L-G09RevE.01|State=1-A|HF=-777.9997638|RMSD=5.676e-09|RMSF=3.949e-06 |Dipole=3.6575166,-2.7069051,1.235842|Quadrupole=-16.8065732,9.9398896 ,8.6666837,9.6313496,-18.145095,3.4751132|PG=C01 [X(C10H12N3O3)]\@

#### 5.M062X.SMD.h2o.opt

1\1\GINC-R3710\FOpt\RM062X\Gen\C10H13N3O3\ROOT\16-Jul-2018\0\# M062X/ Gen 6D SCF=Tight INT(grid=ultrafine) OPT IOP(2/17=4) Freq=Noraman SCR F=(SMD,Solvent=h2o) maxdisk=2147483648\|varyl\_urea\_nitro.M062X.SMD.h2o.o pt\0,1\,C,-4.125916005,3.4998430573,-1.206437773\C,-4.128777902,2.1259 278664,-0.9605600196\C,-0.3246350367,1.5584023043,-0.3576118826\C,-1.9 119464806,2.3456821077,0.0059553437\C,-1.9313341496,3.7288291274,-0.25 5360463\C,-3.0400976655,4.2997898532,-0.8608799511\N,-0.8512055527,1.6 766772167,0.5976971031\C,0.3193607839,2.2062546602,1.119767672\N,1.173 9391185,1.2886176225,1.613403176\O,0.5597848137,3.4207456825,1.1436391 442\C,2.4679646225,1.6830276002,2.1574539036\C,3.2188585319,0.46395184 31,2.6707726964\C,4.5824900658,0.8559491883,3.230461217\H,-3.010563251 9,0.4907358273,-0.1583851458\H,-1.0886115892,4.349875342,0.00839646\H, -0.9664323857,0.6704535873,0.6781382897\H,0.9718771744,0.2991123058,1. 5175175017\H,2.310784151,2.4001941662,2.9706984173\H,3.0542511821,2.18 86527433,1.3804177611\H,3.3428834259,-0.2554520755,1.8519236849\H,2.62 09760398,-0.0281878136,3.447377251\H,5.2007183719,1.3287852149,2.45946 7659\H,5.1200131976,-0.0210156903,3.6029294341\H,4.4763612625,1.564290 3173,4.0594634011\H,-4.9808383039,1.5153116349,-1.2357679338\H,-3.0564 117285,5.3641711626,-1.0648929006\N,-5.2783902402,4.1058908085,-1.8367 558933\O,-5.2670118799,5.3139073691,-2.0490752659\O,-6.2277905702,3.38 95269707,-2.1373528872\|Version=ES64L-G09RevE.01|State=1-A|HF=-778.474 2615|RMSD=9.912e-09|RMSF=9.398e-06|Dipole=2.8426373,-4.0499692,1.68655 44|Quadrupole=-11.9526653,11.6593844,0.2932808,2.84577,-9.5921794,0.48 90728|PG=C01 [X(C10H13N3O3)]\@

#### 7.M062X\_6-31pGd\_opt\_water

1\1\GINC-R3710\FOpt\RM062X\Gen\C10H12F1N3O3\ROOT\04-Feb-2019\0\# M062 X\Gen 6D SCF=Tight INT(grid=ultrafine) OPT IOP(2/17=4) SCRF=(SMD,Solve nt=h2o) maxdisk=2147483648\|2Nitro4Fluro.M062X\_6-31pGd\_opt\_water\0,1\ C,-1.0125306187,2.0137799716,0.4981301908\C,0.2883085143,1.7904330624, -0.1761984722\C,1.4720450154,2.3592671422,0.389247657\N,2.7064605185, 1.9467995501,-0.2684328883\C,3.8908800932,2.4781745051,0.0827193511\O, 4.0030068211,3.3507302217,0.9516121919\N,4.9767417829,1.9392966714,-0. 6074013019\C,6.2919326308,2.3478020477,-0.516269283\C,7.3809896947,1.5 023087074,-0.8593377436\C,6.6159073498,3.6492842771,-0.0945225818\C,7. 9365242334,4.0345700765,-0.0261704793\C,9.0112985207,3.2146015975,-0.3 561888216\C,8.7101110433,1.9373123361,-0.7777311948\H,-1.8634146095,1. 4605264493,0.0900180407\H,-1.2013657893,0.4824629355,0.3482287602\H,0. 2260604467,1.7678729534,-1.2568328218\H,0.4538579866,0.5157357782,-0.0 327294416\H,1.560508879,2.1793367972,1.4676325626\H,1.3277503484,3.436 3028519,0.2457206468\H,2.6585426065,1.2459060521,-1.0007246647\H,5.839 4383038,4.3570915007,0.1587305259\F,8.1973697765,5.2930073839,0.369617 4246\N,7.1922880824,0.1403816708,-1.3056271005\H,10.0304803066,3.57691 92168,-0.2918303895\O,8.1619395458,-0.6056476948,-1.3423685523\O,0.676 851575,-0.2352975144,-1.6413168232\H,-0.9735596895,1.8259329859,1.2 7224269\H,4.8109539025,1.08320985,-1.1265749631\H,9.5018827865,1.25426 86167,-1.060057184\|Version=ES64L-G09RevE.01|State=1-A|HF=-877.6784303 |RMSD=3.571e-09|RMSF=6.704e-06|Dipole=-1.593172,-0.1071962,-0.9661862 |Quadrupole=18.9485783,-14.3365663,-4.612012,9.3825059,3.1287428,-6.74 0761|PG=C01 [X(C10H12F1N3O3)]\@

#### 7.M062X\_6-31pGd\_opt

1\1\GINC-R3812\FOpt\RM062X\Gen\C10H12F1N3O3\ROOT\04-Feb-2019\0\# M062 X\Gen 6D SCF=Tight INT(grid=ultrafine) OPT IOP(2/17=4) maxdisk=2147483 648\|2Nitro4FluroNside.M062X\_6-31pGd\_opt\0,1\,C,-1.0352678055,2.036279 399,0.4335330475\C,0.318954075,1.4442677246,0.049933106\C,1.4302717083 ,2.4809518289,0.1538324012\N,2.7106141557,1.8952699927,-0.2171995475\C ,3.8708598619,2.5614737557,0.0526486769\C,3.9042813274,3.6007264633\O, 6892938521\N,4.9972788279,1.9068629247,-0.44567861809\C,6.312317588,2.3 181790852,-0.391080027495,7.3644533904,1.5405724901,-0.9512319958\C,6. 6777887645,3.530571848,0.2249560082\C,8.0036734159,3.9049305708,0.2589 34644\C,9.0412181228,3.1515251359,-0.2846028517\C,8.6978265154,1.96182 8622,-0.8908801088\H,-1.8284371654,1.2876699411,0.3567820672\H,-1.298 8014596,2.8735236115,-0.2213985301\H,0.272340478,1.0574717064,-0.97739 77919\H,0.5601221078,0.5956410796,0.7011145145\H,1.5200381887,2.849420 0718,1.1797210141\H,1.2068977087,3.3486737469,-0.4825534905\H,2.706764 9081,1.162758537,-0.9153294545\H,5.92406094621,4.1623675563,0.67267797 97\F,8.3107997157,5.0652093172,0.8537883752\N,7.1400764495,0.2665364015 ,1.6220770058\H,10.0656374367,3.4983385991,-0.2247386039\O,8.09902786 65,-0.3207647954,-2.0843715113\O,5.9917389557,-0.1756668701,-1.7009136 117\H,-1.0219289235,2.4076542079,1.4635753727\H,4.8668511064,1.0035652

741,-0.8977444736H,9.4537932168,1.3264318737,-1.3347258921\Version=ES64L-G09RevE.01\State=1-A\HF=-877.6632646\RMSE=8.727e-09\RMSEF=2.068e-06\Dipole=-0.8554689,-0.1352166,-0.1707841\Quadrupole=14.6916499,-10.8073033,-3.8843466,5.7497949,2.2093733,-6.0460769\PG=C01 [X(C10H12F3N3O3)]\@

**7\_anion.M062X\_6-31pGd\_opt**

I\GINC-R3749\FOpt\RM062X\Gen\C10H11F3N3O3(-)\ROOT\04-Feb-2019\0\# M062X\Gen 6D SCF=Tight INT(grid=ultrafine) OPT IOP(2/17=4) maxdisk=2147483648\2Nitro4Fluro\_a1.M062X\_6-31pGd\_opt\1,1\C,-1.0000577334,2.1581915215,0.337527101\C,0.3075739978,1.860696857,-0.3939738059\C,1.5255980725,2.0594959717,0.5066177851\N,2.7579586163,1.7569959228,-0.176701699\C,3.9332814157,2.4644323145,0.1056076968\O,3.8590720145,3.5622860331,0.6809056655\N,5.0174622717,1.7721453816,-0.3317602773\C,6.2452914907,2.3021772288,-0.3160128072\C,7.3670852839,1.5053086394,-0.7351957869\C,6.5894927948,3.659972894,0.0067552267\C,7.8771318087,4.106177014,-0.1325864375\C,8.9478068746,3.3294887493,-0.5844279563\C,8.6561234023,2.012426525,-0.8941766354\H,-1.8698052802,2.0193579858,-0.3136199131\H,-1.014591894,3.1916612225,0.7028932782\H,0.4152332612,2.5108051608,-1.2701232734\H,0.2953550155,0.8281617486,-0.7698618623\H,1.4038157915,1.4495676918,1.4205217894\H,1.5960358031,3.1033253106,0.826591663\H,2.9399487396,0.7924385633,-0.4249756654\H,5.8127988484,4.3277910878,0.3533686315\F,8.1455348532,5.4028057047,0.1841620623\N,7.2206136801,0.0908763437,-1.0333798203\H,9.943847198,3.7473646783,-0.6696095971\O,7.9307544406,-0.380340714,-1.9279862619,0.449940282,-0.5861670176,-0.3761821124\H,-1.1229929365,1.4999762164,1.4289930997\H,9.4289118873,1.340768046,-1.2516668979\Version=ES64L-G09RevE.01\State=1-A\HF=-877.1208194\RMSE=4.782e-09\RMSEF=2.206e-06\Dipole=-1.1640417,0.2528189,0.1206121\Quadrupole=-0.2033485,-7.2667265,7.470075,5.4109432,4.3200221,-6.9733361\PG=C01 [X(C10H11F3N3O3)]\@

**7\_anion.M062X\_6-31pGd\_opt\_water**

I\GINC-R3710\FOpt\RM062X\Gen\C10H11F3N3O3(-)\ROOT\04-Feb-2019\0\# M062X\Gen 6D SCF=Tight INT(grid=ultrafine) OPT IOP(2/17=4) SCRF=(SMD,Solvent=h2o) maxdisk=2147483648\2Nitro4Fluro\_a1.M062X\_6-31pGd\_opt\_water\1,1\C,-0.9807498847,2.1795186527,0.37861841\C,0.3215567742,1.8953306841,-0.363023762\C,1.5320044244,2.2718608089,0.4785768405\N,2.7639334411,1.9904782993,-0.2431542957\C,3.9884292139,2.2156645463,0.314459582\O,4.0695352927,2.8821936149,1.3785274814\N,5.020652407,1.6102857081,-0.3398802905\C,6.2410623546,2.1581657112,-0.3395953229\C,7.4171319076,1.4295797192,-0.7408831357\C,6.479193385,3.5501759128,-0.0749952891\C,7.7234528121,4.0906745533,-0.2188976855\C,8.862723642,3.3751197671,-0.6202450567\C,8.679415388,2.041533658,-0.8882814091\H,-1.8483944641,1.909812671,-0.2309947853\H,-1.0633159633,3.24272647,0.6304859108\H,0.3476108704,2.4579113049,-1.3042398817\H,0.3792048456,0.8305396863,-0.226011827\H,1.5122141285,1.7206905085,1.4295707899\H,1.4965559896,3.3389623467,0.7232758082\H,2.726064247,1.3019593976,-0.9857225355\H,5.6545488182,4.1909542486,0.2106754842\F,7.8778167612,5.4122177073,0.0299351575\N,7.3804049775,0.0312389869,-1.0174805018\H,9.8275807317,3.8612577428,-0.7021170955\O,8.3195362061,-0.4765953484,-1.6519615455\O,6.445005149,-0.6622293034,-0.6183073343\H,-1.0334860652,1.607641997,1.3117149838\H,9.5195326098,1.4304870634,-1.1948093389\Version=ES64L-G09RevE.01\State=1-A\HF=-877.2034746\RMSE=3.845e-09\RMSEF=1.552e-05\Dipole=-1.8320792,1.592814,-0.9160417\Quadrupole=13.393776,-13.2289243,-0.1648517,10.8442798,6.916411,-8.0526493\PG=C01 [X(C10H11F3N3O3)]\@

**13.M062X\_6-31pGd\_opt\_water**

I\GINC-R4385\FOpt\RM062X\Gen\C11H12F3N3O3\ROOT\30-Oct-2018\0\# M062X\Gen 6D SCF=Tight INT(grid=ultrafine) OPT IOP(2/17=4) SCRF=(SMD,Solvent=h2o) maxdisk=2684354560\3TMF4Nitro.M062X\_6-31pGd\_opt\_water\0,1\C,-1.9658583651,1.7695463288,-0.0806185923\C,-0.5748401399,1.1463961009,-0.030590128\C,0.5063299695,2.216108136,-0.0490110062\N,1.8263642127,1.5984374705,-0.0000821539\C,2.9454696501,2.3446251474,-0.0058065997\O,2.9248691756,3.5811891951,-0.0534855861\N,4.124626415,1.6091318544,0.0466079608\C,5.4266422861,2.0726650522,0.0544016583\C,5.7725297188,3.4370215379,-0.0002268114\C,6.4509666772,1.1159961964,0.1197849502\C,7.722455996,1.5126936927,0.1305456401\C,8.1086522995,2.8643317224,0.076705958\C,7.0990477618,3.843902737,0.0101327904\H,-2.7407901678,0.9975219055,-0.0674054174\H,-2.0964904253,2.3635387404,-0.9918183894\H,-2.1310648006,2.4285530951,0.7787918005\H,-0.4328059774,0.4754882938,-0.886641676\H,-0.4671247412,0.5406127915,0.8775174936\H,0.3889532993,2.8883878603,0.8087869112\H,0.4237131695,2.8226806228,-0.9582852559\H,1.8868229705,0.5864361641,0.0399825723\H,4.0270808005,0.5981791982,0.08690422

95\H,4.9872875817,4.1737619263,-0.051189859\H,6.2045612467,0.0593215541,0.1623503465\C,7.3291362288,5.3463141309,-0.0539291145\F,6.1608984364,6.0127638745,-0.1111521995\F,8.0137372387,5.7235553182,-1.145443386\F,7.9644922531,5.8239192891,1.0280049278\N,9.5287044493,3.1772535021,0.093865538\O,10.3272100878,2.249811702,0.1525131333\O,9.8747021929,4.3476421223,0.0493661491\H,8.5596508371,0.7710427371,0.1814030004\Version=ES64L-G09RevE.01\State=1-A\HF=-1115.4153608\RMSE=7.192e-09\RMSEF=2.131e-05\Dipole=-4.1935416,-4.7697022,0.1108934\Quadrupole=-12.3248682,11.5609379,0.7639304,6.9454957,-0.5307636,-0.3262755\PG=C01 [X(C11H12F3N3O3)]\@

**13.M062X\_6-31pGd\_opt**

I\GINC-R4500\FOpt\RM062X\Gen\C11H12F3N3O3\ROOT\30-Oct-2018\0\# M062X\Gen 6D SCF=Tight INT(grid=ultrafine) OPT IOP(2/17=4) maxdisk=2684354560\3TMF4Nitro.M062X\_6-31pGd\_opt\0,1\C,-1.9742617108,1.8081430099,-0.0743935693\C,-0.5979881938,1.1567532736,0.041399076\C,0.5183664618,2.1733536185,-0.1588726302\N,1.8221393759,1.5290110584,-0.0453994365\C,2.9457757133,2.3094894675,0.0347638849\O,2.9092410257,3.5221504368,0.1322635068\N,4.1308980638,1.5715892349,0.029708471\C,5.4356186189,2.0582333087,0.0620162185\C,5.7519439037,4.266046246,0.0374284985\C,6.4733297834,1.1185424186,0.1248147935\C,7.793255906,1.5308174969,0.1404357059\C,8.0964148976,2.8846153733,0.0748085108\C,7.0786995758,3.8432155591,0.0340899126\H,-2.7711822265,1.0741265791,0.0721825569\H,-2.1131420046,2.2628061725,-1.0609042435\H,-2.098867125,2.594374661,0.6774641467\H,-0.5069220117,0.3576899585,-0.7076542375\H,-0.481067923,0.6877261511,1.0255231131\H,0.4720571883,2.9534405162,0.6057165612\H,0.4175323968,2.6705390481,-1.1337652116\H,1.9044140171,0.605826923,-0.4529969127\H,4.0433024454,0.5673805647,0.1154476273\H,4.9562756426,1.1574343408,0.0404785465\H,6.2447774601,0.0564592484,0.1585816452\C,7.331696866,5.3425798193,0.0568299258\F,6.2160761973,6.0014106888,0.415656203\F,7.6896967997,5.8224866796,-1.1377286734\F,8.2740748502,5.671815069,0.9508907684\N,9.5222919386,3.2310767065,0.0117549002\O,10.3009411288,2.4775595910,0.571921867\O,9.8349201249,4.2181475989,-0.6238281177\H,8.6047411896,0.8134308036,0.1933765923\Version=ES64L-G09RevE.01\State=1-A\HF=-115.3915663\RMSE=2.107e-09\RMSEF=2.631e-06\Dipole=-2.9671422,-2.9888594,-0.2429525\Quadrupole=-6.3576759,7.3458022,-0.9881263,3.2836212,1.788044,2.1060722\PG=C01 [X(C11H12F3N3O3)]\@

**13\_anion.M062X\_6-31pGd\_opt**

I\GINC-R3715\FOpt\RM062X\Gen\C11H11F3N3O3(-)\ROOT\05-Nov-2018\0\# M062X\Gen 6D SCF=Tight INT(grid=ultrafine) OPT IOP(2/17=4) maxdisk=2684354560\3TMF4Nitro\_a1.M062X\_6-31pGd\_opt\1,1\C,-1.3581310006,2.2054081771,-0.7458211021\C,0.0613748678,1.6778421972,-0.5481016245\C,0.4957968866,1.7456802352,0.9190271108\N,1.8474166395,1.2987795197,1.1567395427\C,2.9224160159,2.0936207262,0.7577023166\O,2.7167195396,3.2853304347,0.4838416936\N,4.0838718565,1.3761751616,0.7516294331\C,5.260008906,1.9409889777,0.4458049673\C,5.5150125359,3.1157444175,0.0871365760\C,6.4047791501,1.0868363826,0.4628984188\C,7.6652219371,1.5504556019,0.1841670566\C,7.8924491552,2.900817413,-0.1284926255\C,6.7846634402,3.783500305,-0.1856946706\H,-1.6687553969,2.1510121001,-1.7945405548\H,-1.4278432069,3.2526790353,-0.4301889722\H,-2.0805113738,1.630609461,-0.1524247392\H,0.7734997752,2.2670765489,-1.1362365324\H,0.1313731838,0.6385824956,-0.8971867848\H,-0.1829284666,1.1442670489,1.5391205866\H,0.429427814,2.7830156342,1.2635278883\H,2.0426131458,0.3069451522,1.1358460353\H,4.667380009,3.9769089567,0.0204101016\H,6.2421824982,0.044272026,0.7188989898\C,6.8821240697,5.2398616424,-0.6030429437\F,5.6600028898,5.7757756591,-0.810191975\F,7.5425987933,5.4028764364,-1.764946641\F,7.4619282122,6.0264806111,0.3195946127\N,9.255352754,3.3011869866,-0.3307146512\O,10.1080216898,2.4217919052,-0.4797228752\O,9.5326264609,4.4956486353,-0.3291867085\H,8.5212766973,0.8865449392,0.2156680703\Version=ES64L-G09RevE.01\State=1-A\HF=-1114.8714964\RMSE=8.671e-09\RMSEF=1.512e-06\Dipole=-2.0757671,-0.8498793,-0.1704433\Quadrupole=-24.8592574,9.8745548,14.9847026,-5.101336,5.9663187,2.0737726\PG=C01 [X(C11H11F3N3O3)]\@

**13\_anion.M062X\_6-31pGd\_opt\_water**

I\GINC-R3720\FOpt\RM062X\Gen\C11H11F3N3O3(-)\ROOT\30-Oct-2018\0\# M062X\Gen 6D SCF=Tight INT(grid=ultrafine) OPT IOP(2/17=4) SCRF=(SMD,Solvent=h2o) maxdisk=2684354560\3TMF4Nitro\_a1.M062X\_6-31pGd\_opt\_water\1,1\C,-1.8861077475,1.9057841803,-0.0561628562\C,-0.508347472,1.3429660982,-0.3904025832\C,0.5987088259,2.1966485739,0.2104247844\N,1.9041740684,1.6381930266,-0.1056513847\C,3.0563561695,2.1989764817,0.3538303957\O,3.0194124338,3.3289596644,0.9021675073\N,4.1590805126,1.3994476

616,0.2063791684\C,5.3870283533,1.9312910138,0.1792617575\C,5.69779823  
75,3.3093075073,-0.0924284663\C,6.5054375226,1.0601708597,0.3418245549  
\C,7.7929162143,1.5299123206,0.318377716\C,8.0671772149,2.894873449,0  
1.153554999C,6.9870455239,3.787025279,-0.1225288352\H,-2.679149541,1.  
2923496168,-0.4942596353\H,-1.9963733401,2.9252479771,-0.4423529945\H,  
-2.0440163835,1.9373548415,1.0276059267\H,-0.3764131661,1.2942494238,-  
1.478199277\H,-0.4208312712,0.3177133803,-0.0087745485\H,0.4695415173,  
2.2633852733,1.2998654521\H,0.5382678787,3.2168291778,-0.1846093666\H,  
1.9504203875,0.6683308307,-0.3947340403\H,4.8818607299,3.9816100027,-0  
3.156267348\H,6.3170411426,0.0050572954,0.5141506774\C,7.1552945521,5.  
243970998,-0.5095219876\F,6.001232762,5.765133216,-0.972574421\F,8.049  
7922595,5.4158371278,-1.4996452444\F,7.5172697259,6.0342343897,0.51635  
29238\N,9.4196890211,3.3075328688,0.2075900365\O,10.3130892289,2.45009  
03435,0.1904007501\O,9.6824578638,4.5074457269,0.3217944245\H,8.622116  
7754,0.8526213938,0.4876108005\Version=ES64L-G09RevE.01|State=1-A|HF=  
-1114.944651|RMSD=2.302e-09|RMSF=7.686e-06|Dipole=-3.6005609,-1.752201  
,-1.0730036|Quadrupole=-20.2487377,8.6914595,11.5572782,-2.8889577,3.7  
547633,-0.7691535|PG=C01 [X(C1H11F3N2O3)]\@

### I\_propanoate.M062X\_6-31pGd\_opt\_water

I\I\GINC-R3717\FOpt\RM062X\Gen\CI14H17C11F3N2O3(1-)\ROOT\27-Feb-2019\O\  
M062X\Gen 6D SCF=Tight INT(grid=ultrafine) OPT=CalcFC IOP(2/17=4) S  
CRF=(SMD,Solvent=h2o) maxdisk=2684354560\3TFM4Chloro\_EtO.M062X\_6-31pG  
d\_opt\_water\I,1\C,-1.884440543,2.1747068131,-0.158925398\C,-0.48535  
22647,1.6160429001,0.0798005718\C,8.825431103,2.6429793427,-0.2684176  
851\N,1.9092564812,2.0901298074,-0.0391614833\C,3.0134457734,2.8284086  
41,-0.2642906714\O,2.9614643096,3.9976455783,-0.6913417422\N,4.1973870  
601,2.1751134772,0.010147846\C,5.4906133422,2.6697570897,-0.1404898574  
\C,5.8034547926,4.0227995844,-0.3299290447\C,6.5420535202,1.7420443207  
,-0.0629741339\C,7.8634583196,2.1461663163,-0.1771260574\C,8.166112179  
7,3.4892254918,-0.3766669564\C,7.1331261052,4.4237874986,-0.4513751427  
\H,-2.6513988653,1.4364322672,0.0935480342\H,-2.019890529,2.456104496  
6,-1.2091840975\H,-2.0598889832,3.0660484691,0.4537319198\H,-0.3317632  
116,0.7143129594,-0.5258530774\H,-0.3733861056,1.3197496895,1.13015567  
5\H,0.4449542914,3.5456372537,0.3404290873\H,0.4846398069,2.9426364004  
,-1.3190901038\H,1.9863253901,1.1516445649,0.3740596811\H,5.0161949739  
4.7602427281,-0.3782500937\H,6.3154854984,0.6903407215,0.0892871283\H  
8.6632338761,1.4150665452,-0.1156995916\C1,9.8421724476,3.9562400983,  
-0.5260669576\C,7.4308617446,5.8843307266,-0.6598573328\F,6.3177292036  
6.633432134,-0.6999625676\F,8.0857045485,6.111861697,-1.8162581626\F,  
8.2003411187,6.3944622633,0.3224554694\H,4.1312765351,1.1677351524,0.2  
29953857\O,1.971406319,-0.5696652895,1.115877081\O,4.1232109026,-0.63  
39777092,0.5145228584\C,3.0499544099,-1.1927867368,0.8813249705\C,3.02  
44185101,-2.707707951,1.0606213264\C,4.3418675392,-3.4155953709,0.7792  
63036\H,2.2302065208,-3.0914421231,0.4088984206\H,2.6901137967,-2.9019  
300004,2.0868371045\H,4.6684225708,-3.2496654502,-0.2519778369\H,4.235  
4102869,-4.4944647628,0.930577113\H,5.1338836526,-3.0578096346,1.44443  
68137\Version=ES64L-G09RevE.01|State=1-A|HF=-1638.411338|RMSD=4.988e-  
09|RMSF=2.811e-06|Dipole=1.2524818,0.0109244,-0.2620435|Quadrupole=-1.  
2681178,-10.3946419,11.6627597,-17.3327898,5.8214479,8.942544|PG=C01 [X(C14H17C11F3N2O3)]\@

### 29.M062X\_6-31pGd\_opt\_Pentadecane

I\I\GINC-R3714\FOpt\RM062X\Gen\CI11H21C11F3N2O1\ROOT\27-Feb-2019\O\  
M062X\Gen 6D SCF=Tight INT(grid=ultrafine) OPT=CalcFC IOP(2/17=4) SCRF=  
(SMD,Solvent=n-Pentadecane) maxdisk=2147483648\3TFM4Chloro.M062X\_6-31  
pGd\_opt\_Pentadecane\O,1\C,-1.9258572339,2.0831568688,-0.0525783215\C,  
-0.5337648158,1.4892504194,0.1416775058\C,0.5551386138,2.4779377813,-0  
2540810077\N,1.8722472755,1.883688445,-0.0664386205\C,2.9914182555,2.  
665903514,-0.1372738732\O,2.9456893384,3.8845939318,-0.223526626\N,4.  
1776531577,1.9466203961,-0.0737078406\C,5.4823371999,2.4472891459,-0.1  
158105471\C,5.7926943534,3.7896140799,-0.367706828\C,6.5289674049,1.5  
393632746,0.0911265842\C,7.8520404924,1.9522147399,0.047038312\C,8.158  
2216145,3.2851859969,-0.2039841211\C,7.1238650441,4.1996119944,-0.4102  
754047\H,-2.7027709982,1.3687108527,0.2351879999\H,-2.0951250954,2.359  
1062421,-1.099192753\H,-2.0565497299,2.9841219205,0.5566966342\H,-0.43  
62299409,0.5764643457,-0.4622371016\H,-0.3884599109,1.19881455,1.18918  
10345\H,0.5026703862,3.3749906734,0.3689942632\H,0.4203576494,2.797719  
7581,-1.2969952457\H,1.958137244,0.893965308,-0.2650403254\H,4.1034710  
619,0.9546896808,0.116916521\H,4.9999598443,4.507601879,-0.5240784214\  
H,6.3064617854,0.4936946915,0.2895386404\H,8.6531544513,1.2387239844,0  
2092218499\C1,9.8330736959,3.7615304596,-0.2507581505\C,7.4231135514,  
5.6528582012,-0.685032139\F,6.3047894366,6.3740370678,-0.8546065702\F,

8.1600127896,5.813586489,-1.799102627\F,8.1053826287,6.2267093086,0.32  
20832503\Version=ES64L-G09RevE.01|State=1-A|HF=-1370.5493271|RMSD=9.3  
96e-09|RMSF=1.495e-06|Dipole=-1.8148754,-3.2513507,0.2501586|Quadrupol  
e=1.8775832,3.984965,-5.8625482,3.1863918,1.4652031,-0.5900867|PG=C01  
[X(C11H21C11F3N2O1)]\@

### I\_propanoate.M062X\_6-31pGd\_bsse

I\I\GINC-R3790\SP\RM062X\Gen\CI14H17C11F3N2O3(1-)\ROOT\28-Feb-2019\O\  
M062X\Gen 6D SCF=Tight INT(grid=ultrafine) Counterpoise=2 maxdisk=671  
088640\3TFM4Chloro\_EtO.M062X\_6-31pGd\_bsse\I,1\C,-1.9350471484,2.2  
180103752,-0.1305899469\C,0,-0.5267463045,1.6325114566,-0.204318874\C,  
0.05409143418,2.7061072276,-0.0204448896\N,0,1.8535955703,2.103443856  
7,-0.0425519102\C,0,2.9604201904,2.8729704502,-0.1788478344\O,0,2.9246  
413093,4.0911499807,-0.3719013675\N,0,4.1351539459,2.1390500798,-0.088  
9275035\C,0,5.4264431378,2.6124030987,-0.1892682154\C,0,5.773863527,3  
9562732322,-0.4172035704\C,0,6.461761235,1.6660985425,-0.0520074491\C  
0,7.7902817015,2.0491121585,-0.140295105\C,0,8.1280351024,3.380111748  
0,-0.3666863109\C,0,7.1149365649,4.3301361761,-0.5034130508\H,0,-2.6974  
399595,1.4451714128,-0.2737647043\H,0,-2.0846327559,2.9844767849,-0.90  
05660336\H,0,-2.1145067424,2.6883633217,0.843407443\H,0,-0.3681448857,  
1.1399912832,-1.1713353482\H,0,-0.3926202656,0.8563529761,0.5585852217  
\H,0,0.370750312,3.2430627655,0.9272795483\H,0,0.4792978,3.456571089,  
-0.8185480229\H,0,1.9371537681,1.1057409244,0.2256767957\H,0,4.9902615  
644,4.693407817,-0.523659052\H,0,6.1945179882,0.6268886367,0.126482641  
1\H,0,8.5799525766,1.3119960874,-0.0332470618\O,0,8.723821932,3.80511  
681,-0.4704670077\C,0,7.4476957309,5.7776867488,-0.46580376\F,0,6.35  
17941009,6.5473283673,-0.8438002967\F,0,8.1434089801,5.960389457,-1.88  
86867407\F,0,8.1970469314,6.3056336101,0.2439579979\H,0,4.0547176561,1  
1152344938,0.0850242947\O,0,1.9574329375,-0.6148767426,0.7009336492\O  
0,4.183767369,-0.5925567902,0.4062706288\C,0,3.0911518052,-1.15739702  
25,0.6850781007\C,0,3.1330638089,-2.6527171218,1.0411307738\C,0,4.5263  
617659,-3.2689559345,1.0171860787\H,0,2.4619650162,-3.1674510275,0.342  
3414726\H,0,2.6708581682,-2.7599073253,2.0302603216\H,0,4.9773533324,  
3.164363788,0.026146271\H,0,4.4943024122,-4.3342900849,1.2770106522\H  
0,5.1868026539,-2.7573211419,1.7233664421\Version=ES64L-G09RevE.01|S  
tate=1-A|HF=-267.7285057|RMSD=3.997e-09|Dipole=0.7114536,0.2849117,-0.  
1323476|Quadrupole=-7.900656,-1.3059268,19.2065828,-16.8875241,4.2637  
662,6.4054948|PG=C01 [X(C14H17C11F3N2O3)]\@

### I\_propanoate.M062X\_6-31pGd\_opt\_Pentadecane

I\I\GINC-R3761\FOpt\RM062X\Gen\CI14H17C11F3N2O3(1-)\ROOT\27-Feb-2019\O\  
M062X\Gen 6D SCF=Tight INT(grid=ultrafine) OPT=CalcFC IOP(2/17=4) S  
CRF=(SMD,Solvent=n-Pentadecane) maxdisk=2684354560\3TFM4Chloro\_EtO.M0  
62X\_6-31pGd\_opt\_Pentadecane\I,1\C,-1.9406332924,2.2410976224,-0.1174  
961003\C,-0.5388689799,1.6406662499,-0.0625681477\C,0.5356435567,2.721  
551927,-0.0710273607\N,1.8497253656,2.1173109035,-0.0072333658\C,2.959  
9007033,2.8747854904,-0.1597473086\O,2.9248032561,4.0881842356,-0.3896  
922449\H,4.1349755055,2.1487217099,-0.0372020131\C,5.4283503482,2.6221  
329897,-0.1465852843\C,5.7739912719,3.9577600078,-0.4160904008\C,6.465  
5028836,1.6844464994,0.0250952436\C,7.7941301952,2.0663416508,-0.06740  
56978\C,8.1290618512,3.3904958513,-0.3340348004\C,7.1141670033,4.33220  
4128,-0.5077548422\H,-2.7076791418,1.4597233019,-0.1138297079\H,-2.078  
6505212,2.841236631,-1.0247432705\H,-2.1251073949,2.8937644053,0.74398  
39558\H,-0.3784525666,0.9715268855,-0.9166737629\H,-0.4245825835,1.024  
606383,0.8372371241\H,0.3850979665,3.4065226290,0.7770295156\H,0.4572  
868717,3.3290556426,-0.9817250541\H,1.924702809,1.1133390105,0.2347849  
168\H,4.9917593255,4.6910730594,-0.5516596598\H,6.2036897083,0.6496796  
109,0.2326338781\H,8.5826685979,1.3326460563,0.0675792964\C1,9.8227227  
184,3.8201192403,-0.4406691281\C,7.4433362081,5.771727602,-0.798118191  
1\F,6.3450372437,6.5314967459,-0.9376408784\F,8.1530685677,5.917250935  
4,-1.9364216184\F,8.1761339646,6.3395099025,0.1823129089\H,4.058157250  
6,1.1294816929,0.160721708\O,1.9730574154,-0.6354863791,0.6416424355\O  
4.2093670109,-0.5805401989,0.4854129982\C,3.1100580858,-1.1734517748,  
0.6628769225\C,3.1411898933,-2.6857802551,0.9256437189\C,4.5335670237,  
-3.3006087877,0.9700521399\H,2.531350654,-3.1575172022,0.1449340009\H,  
2.6056408589,-2.8594761756,1.8670959939\H,5.0597866917,-3.145299988,0.  
0234595032\H,4.4809616914,-4.3791126058,1.1619581241\H,5.1395919827,-2  
8411399323,1.7568944533\Version=ES64L-G09RevE.01|State=1-A|HF=-1638.  
3803077|RMSD=4.516e-09|RMSF=4.115e-06|Dipole=0.7183327,0.207717,-0.127  
1292|Quadrupole=-5.5421119,-11.8829516,17.4250634,-17.0216086,4.194242  
7,6.4760968|PG=C01 [X(C14H17C11F3N2O3)]\@

## 29.M062X\_6-31pGd\_opt

I\1\GINC-R3718\FOpt\RM062X\Gen\C11H12Cl1F3N2O1\ROOT\27-Feb-2019\0\# M062X\Gen 6D SCF=Tight INT(grid=ultrafine) OPT=CalcFC IOP(2/17=4) maxdisk=2147483648\3TFM4Chloro.M062X\_6-31pGd\_opt\0,1\C,-1.9238118665,2.130260249,-0.0240079758\C,-0.5429143905,1.49233382681,0.1105817285\C,0.565679541,2.4874657783,-0.2071689609\N,1.872892206,1.8558202101,-0.0718067082\C,2.9968520996,2.6475966299,-0.109349224O,2.9498935416,3.8648380839,-0.1160847102\N,4.1813751465,1.9201664846,-0.106434271\C,5.4874750784,2.4263847924,-0.1351449561\C,5.7900361879,3.7720181627,-0.374566838\C,6.5364316884,1.5211782723,0.0630119031\C,7.8576652566,1.941174267,0.0220745769\C,8.1582485447,3.2777412516,-0.2168317359\C,7.1188814352,4.189105686,-0.4140953478\H,-2.7147920025,1.4116712985,0.2076565257\H,-2.0906467037,2.4972241989,-1.0422625423\H,-2.0301418537,2.9792178472,0.6593440632\H,-0.4700464089,0.630914136,-0.5681065784\H,-0.3978293366,1.1102735155,1.1279793269\H,0.5371674955,3.3309517059,0.4877451983\H,0.435628158,2.8992092059,-1.2182088599\H,1.9491634331,0.9130890974,-0.4341078472\H,4.1077510669,0.9330023215,0.1008931075\H,4.9935104698,4.4887814164,-0.5198244001\H,6.3194677656,0.4721620893,0.250682255\H,8.6643388522,1.2326654297,0.1770699552\Cl,9.8281376784,3.7588369322,-0.2597943325\C,7.411075842,5.6480748895,-0.6756822117\F,6.2864576725,6.3609571409,-0.8354179655\F,8.1431281052,5.8180777815,-1.7895677907\F,8.0911368843,6.2109870818,0.3366546157\Version=ES64L-G09RevE.01\State=1-A\HF=-1370.5329301\RMMSD=3.506e-09\RMSF=1.227e-06\Dipole=-1.5885245,-2.7672284,0.09641\Quadrupole=2.5521173,2.8576786,-5.4097959,2.539066,1.8461054,-0.1723318\PG=C01 [X(C11H12Cl1F3N2O1)]\@

## I\_propanoate.M062X\_6-31pGd\_opt

I\1\GINC-R3782\FOpt\RM062X\Gen\C14H17Cl1F3N2O3(1-)\ROOT\27-Feb-2019\0\# M062X\Gen 6D SCF=Tight INT(grid=ultrafine) OPT=CalcFC IOP(2/17=4) maxdisk=2684354560\3TFM4Chloro\_EtO.M062X\_6-31pGd\_opt\1,1\C,-1.9350471484,2.2180103752,-0.1305899469\C,-0.5267463045,1.6325114566,-0.20431874\C,0.5409143418,2.7061072276,-0.0204448896\N,1.8535955703,2.1034438567,-0.0425519102\C,2.9604201904,2.8729704502,-0.1788478344O,2.9246413093,4.0911499807,-0.3719013675\N,4.1351539459,2.1390500798,-0.0889275035\C,5.4264431378,2.6124030987,-0.1892682154\C,5.7739863527,3.956273232,-0.4172035704\C,6.461761235,1.6660985425,-0.0520074491\C,7.7902817015,2.0491121585,-0.140295105\C,8.1280351024,3.380111748,-0.3666863109\C,7.1149365649,4.3301361761,-0.5034130508\H,-2.6974399595,1.4451714128,-0.2737647043\H,-2.0846327559,2.9844767849,-0.9005660336\H,-2.1145067424,2.6883633217,0.843407443\H,-0.3681448887,1.1399912832,-1.1713353482\H,-0.3926202656,0.8563529761,-0.5585852217\H,0.370750312,3.2430627655,0.9272795483\H,0.4792978,3.455671089,-0.8185480229\H,1.9371537681,1.1057409244,0.2256767957\H,4.9902615644,4.693407817,-0.523659052\H,6.1945179882,0.6268886367,0.1264826411\H,8.5799525766,1.3119960874,-0.0332470618\C,9.823821932,3.80511681,-0.4704670077\C,7.4476957309,5.7776867488,-0.7465780376\F,6.3517941009,6.5473283673,-0.8438002967\F,8.1434089801,5.960389457,-1.8886867407\F,8.1970466314,6.3056336101,0.243957979\H,4.0547176561,1.1152344938,0.0850242947O,1.9574329375,-0.6148767426,0.7009336492O,4.183767369,-0.5925567902,0.4062706288\C,3.0911518052,-1.1573970225,0.6850781007\C,3.1330638089,-2.6527171218,1.0411307738\C,4.5263617659,-3.2689559345,1.0171860787\H,2.4619650162,-3.1674510275,0.3423414726\H,2.6708581682,-2.7599073253,2.0302603216\H,4.9773533324,-3.164363788,0.0261462711\H,4.4943024122,-4.3342900849,1.2770106522\H,5.1868026539,-2.7573211419,1.7233664421\Version=ES64L-G09RevE.01\State=1-A\HF=-1638.3401141\RMMSD=8.284e-09\RMSF=1.027e-06\Dipole=0.7102319,0.3137589,-0.1395016\Quadrupole=-7.8235341,-11.5002611,19.3237952,-16.9855432,4.2898447,6.4785243\PG=C01 [X(C14H17Cl1F3N2O3)]\@

## 29.M062X\_6-31pGd\_opt\_water

I\1\GINC-R3741\FOpt\RM062X\Gen\C11H12Cl1F3N2O1\ROOT\27-Feb-2019\0\# M062X\Gen 6D SCF=Tight INT(grid=ultrafine) OPT=CalcFC IOP(2/17=4) SCRF=(SMD,Solvent=h2o) maxdisk=2147483648\3TFM4Chloro.M062X\_6-31pGd\_opt\_wa ter\0,1\C,-1.9242305017,2.0591355712,-0.1305165714\C,-0.5324883817,1.4949760555,0.1359820335\C,0.5459946396,2.5119576818,-0.2055934555\N,1.867250505,1.9528576485,0.0528612208\C,2.9871122186,2.6713508328,-0.1746062174O,2.9503977216,3.8575858235,-0.5369271189\N,4.1665046975,1.9851881227,0.0351253059\C,5.4730232011,2.4601588653,-0.1028456508\C,5.800826279,3.8100603532,-0.2761091453\C,6.5072797756,1.5156366436,-0.0372065254\C,7.8345175143,1.9019455587,-0.1461813046\C,8.1556526882,3.2431927918,-0.3267667575\C,7.1362597153,4.1932777432,-0.3907706592\H,-2.6980224932,1.326787448,0.1178737322\H,-2.0417522701,2.329728065,-1.1855934516\H,-2.1040509548,2.9572990842,0.4704814881\H,-0.3753888052,0.5878620479,-0.4606729402\H,-0.4384430857,1.2097006808,1.190846277\H,0.4149

98265,3.4169651479,0.3979811533\H,0.4682293655,2.8045281316,-1.2600243298\H,1.936940364,0.9674589784,0.2834534437\H,4.0881512136,0.997888441,0.259251221\H,5.0241729836,4.5589739765,-0.3184286614\H,6.2672074753,0.4647996648,0.100738294\H,8.6229741991,1.1583061295,-0.0941844108\Cl,9.8370630088,3.6893851195,-0.4652875873\C,7.4533683416,5.6529690339,-0.5788273484\F,6.3487249905,6.4144530967,-0.6166907427\F,8.1186091916,5.8861950739,-1.727513336\F,8.2212181382,6.1405961886,0.415423694\Version=ES64L-G09RevE.01\State=1-A\HF=-1370.5529019\RMMSD=4.075e-09\RMSF=2.875e-06\Dipole=-2.0557969,-4.3024863,0.9144214\Quadrupole=0.9241778,6.0361921,-6.9603699,5.2681364,-2.0183325,-2.0343225\PG=C01 [X(C11H12Cl1F3N2O1)]\@

## 2.M062X\_6-31pGd\_opt\_Pentadecane

I\1\GINC-R3757\FOpt\RM062X\Gen\C10H13F5N2O1S1\ROOT\25-Feb-2019\0\# M062X\Gen 6D SCF=Tight INT(grid=ultrafine) OPT IOP(2/17=4) SCRF=(SMD,Solvent=n-Pentadecane) maxdisk=2147483648\4SF5.M062X\_6-31pGd\_opt\_Pentadecane\0,1\C,-2.092236994,1.8823633087,-0.0462364898\C,-0.7308641846,1.946260171,-0.0003441166\C,0.4039743467,2.207494909,0.0818595655\N,1.6908386328,1.5258972876,0.1264470411\C,2.8467557688,2.2282152676,-0.0699404079O,2.8640622696,3.405649315,-0.3966564048\N,3.9939458189,1.462659561,0.1073492796\C,5.3227317463,1.8750174924,0.0148923396\C,5.7152429139,3.2047236129,-0.2011862267\C,6.3078780809,0.884049052,0.1641361398\C,7.6548730431,1.2015709568,0.1040540074\C,8.0218494071,2.5266461208,-0.1076301922\C,7.0673456254,3.5240950617,-0.2598637758\H,-2.9019514638,1.1493285659,-0.1080046271\H,-2.169603756,2.5414517417,-0.9177980764\H,-2.2584486798,2.4905860173,0.8496921942\H,-0.5896831248,0.5733881095,-0.8929591209\H,-0.6873695436,0.5239904172,0.8688561351\H,0.2774062222,2.8534233322,0.9621376378\H,0.4029216559,2.8559769457,-0.7985079459\H,1.7308309632,0.6615852448,0.6534797597\H,3.8614509914,0.4688575042,0.2515211192\H,4.969771482,3.9770664758,-0.324908304\H,6.0130597691,-0.1489876809,0.3305922149\H,8.4013936927,0.4237370906,0.2213667773\N,9.7712480251,2.9542071513,-0.1847913801\H,7.3619175206,4.554784348,-0.4257000381\F,10.1168913485,1.7036041822,-1.1504484743\F,11.3375794961,3.3340350715,-0.2525535635\F,9.5689321193,3.8990308809,-1.4796334817\F,9.5836981693,4.240667298,0.774934575\F,10.1323486378,2.0455174883,1.1038493661\Version=ES64L-G09RevE.01\State=1-A\HF=-1470.5462802\RMMSD=4.062e-09\RMSF=7.645e-06\Dipole=-2.9372259,-2.1436125,0.6870021\Quadrupole=-0.7003529,5.2237386,-4.5233857,7.8870997,-3.853601,-2.4580699\PG=C01 [X(C10H13F5N2O1S1)]\@

## 2.M062X\_6-31pGd\_opt

I\1\GINC-R3710\FOpt\RM062X\Gen\C10H13F5N2O1S1\ROOT\30-Oct-2018\0\# M062X\Gen 6D SCF=Tight INT(grid=ultrafine) OPT IOP(2/17=4) maxdisk=2147483648\4SF5.M062X\_6-31pGd\_opt\0,1\C,-2.0948335042,1.9046393492,0.0044342604\C,-0.7387005762,1.2091435064,0.0979128525\C,0.408084306,2.2036544755,-0.0249872519\N,1.6878407,1.5158695525,0.0682705488\C,2.8517733354,2.220609996,-0.034915754O,2.8683270034,3.4287793658,-0.2037620392\N,3.9992797709,1.4395905567,0.071456147\C,5.3292742418,1.8632288845,0.0073631391\C,5.7138230818,3.1993799716,-0.1763848696\C,6.3187306185,0.8755412601,0.1376630783\C,7.6646618585,1.201190052,0.0876681324\C,8.0266286555,2.5310910273,-0.0950741354\C,7.0652418884,3.5245267145,-0.226435952\H,-2.9135377655,1.1853756323,0.0927245266\H,-2.2037356321,2.4228325913,-0.953942271\H,-2.2104659744,2.6459935776,0.8018584347\H,-0.6527215837,0.4558511302,-0.6962839698\H,-0.6593480367,0.679465111,1.056508968\H,0.3465416167,2.9602827842,0.7662296944\H,0.3549140132,2.735018087,-0.9824559294\H,1.688479682,0.5155120816,0.2084528423\H,3.873013882,0.4459185867,0.2096761318\H,4.9621638561,3.9689113161,-0.2783096187\H,6.0301970677,-0.1631051756,0.2802254097\H,8.41731823,0.4275780245,0.1898297642\N,9.775366344,2.9694076766,-0.1619778373\H,7.358385244,4.588334301,-0.3686207991\F,10.1215643051,1.7341942428,-1.145352719\F,11.3531324769,3.35722828,-0.2211755462\F,9.5624590014,3.9305059196,-1.4415318488\F,9.5718424038,4.237262061,0.8165344846\F,10.1310894012,2.0409426307,1.1124129979\Version=ES64L-G09RevE.01\State=1-A\HF=-1470.530635\RMMSD=4.697e-09\RMSF=3.326e-05\Dipole=-2.7126732,-1.98461,0.28297\Quadrupole=1.0205306,4.541292,-5.5618225,8.046695,-1.1271033,-1.450379\PG=C01 [X(C10H13F5N2O1S1)]\@

## 2.M062X\_6-31pGd\_opt\_water

I\1\GINC-R3714\FOpt\RM062X\Gen\C10H13F5N2O1S1\ROOT\30-Oct-2018\0\# M062X\Gen 6D SCF=Tight INT(grid=ultrafine) OPT IOP(2/17=4) SCRF=(SMD,Solvent=h2o) maxdisk=2147483648\4SF5.M062X\_6-31pGd\_opt\_water\0,1\C,-2.0874983117,1.8805065948,0.0189597345\C,-0.7268055172,1.1994554923,0.1239606135\C,0.4020532443,2.1994084289,-0.0744248406\N,1.6939631322,1.533

8635482,0.0419683464C,2.8454377421,2.2197985863,-0.1117044544O,2.865  
6735446,3.4215918137,-0.415035459N,3.9911653428,1.4702449884,0.081135  
3734C,5.3181546514,1.8884149835,0.0080895559C,5.7197028526,3.2267677  
464,-0.1254226112C,6.298606783,0.8840322528,0.0974702407C,7.64687980  
78,1.1957330538,0.050443926C,8.0189649091,2.5306158907,-0.0872380303  
C,7.073177096,3.5440382396,-0.1734955657H,-2.8985787841,1.1598611384,  
0.1588681164H,-2.21654674,2.3474651913,-0.9636798573H,-2.1942821804,  
2.6611738624,0.7801590987H,-0.64396145,0.4066648505,-0.6293296882H,-  
0.6203347073,0.7249212149,1.1073636379H,0.3313821637,3.0008536204,0.6  
71352024H,0.3257821824,2.6630733979,-1.0641110643H,1.713432322,0.574  
6490841,0.3711392352H,3.8611701975,0.4774613767,0.2516164683H,4.9887  
376242,4.0191928392,-0.1873247487H,5.9950265495,-0.1534685656,0.20523  
86517H,8.3845311347,0.403440359,0.1195510582S,9.7671329868,2.9501620  
068,-0.15193494H,7.3673391676,4.5834012593,-0.2745409286F,10.1065168  
611,1.7627577044,-1.1979075374F,11.3421278343,3.326337872,-0.2101401  
321F,9.5706537518,3.9785036301,-1.3856027126F,9.6062986077,4.1798385  
542,0.8874065125F,10.1428872017,1.9644936096,1.0751799774\\Version=ES  
64L-G09RevE.01\\State=-1-\\AHF=-1470.5502283\\RMSD=6.128e-09\\RMSF=7.732e-0  
6\\Dipole=-3.358652,-3.1069701,0.7806074\\Quadrupole=-1.3209659,7.06165  
37,-5.7406879,12.5173808,-4.1283499,-1.5860141\\PG=C01 [X(C10H13F5N2O1S  
1)]\\@

## 2\_propanoate.M062X\_6-31pGd\_opt\_Pentadecane

I\\G1NC-R3777\\FOpt\\RM062X\\Gen\\C13H18F5N2O3S1(1-)\\ROOT\\19-Feb-2019\\O\\  
# M062X/Gen 6D SCF=Tight INT(grid=ultrafine) OPT IOP(2/17=4) SCRF=(SMD  
,Solvent=n-Pentadecane) maxdisk=3221225472\\4SF5\_EtO.M062X\_6-31pGd\_opt  
\_Pentadecane\\-1,\\C,-2.1603464566,2.3378583421,-0.089024084\\C,-0.8157  
249329,1.6317428169,0.0597884595C,0.3476219408,2.5846439935,-0.186983  
6024N,1.6063950709,1.8857308841,-0.0314410794C,2.7740622416,2.552998  
235,-0.1621659133O,2.8382374089,3.7602505125,-0.4134979036N,3.888158  
6504,1.7414894652,0.0180011472C,5.2126783146,2.1107408782,-0.05293533  
62C,5.673331125,3.4124808561,-0.3373140277C,6.1637264482,1.090738594  
2,0.1794109124C,7.5201489947,1.3545921304,0.1299555883C,7.948550088,  
2.6512550793,-0.1543575982C,7.0366791312,3.6748785116,-0.3866072334H  
-,2.9921481474,1.6478218276,0.0863676324H,-2.2786344699,2.7548056749,  
-1.09618552H,-2.2543988493,3.1637311348,0.6260506472H,-0.7486448907,  
0.7915600145,-0.6415853652H,-0.7211725131,1.2022805717,1.0643160737H  
,0.3015054036,3.428106261,0.5156056578H,0.2758345721,3.0144017147,-1.  
1964476942H,1.5918793358,0.8675272765,0.1609945672H,3.7219796665,0.7  
370389923,0.241819801H,4.9585713729,4.2032701949,-0.5159283777H,5.80  
66324327,0.0880045417,0.3993697584H,8.2328712552,0.5570909001,0.31133  
2992S,9.7077742423,3.0014439969,-0.2211504852H,7.3761113472,4.681594  
3928,-0.60780869536F,10.0379678837,1.6759421516,-1.092938712F,11.2999  
337121,3.3156529041,-0.2810581764F,9.5865463026,3.8682348324,-1.58526  
14996F,9.5722197935,4.3661558104,0.6424661981F,10.0233522162,2.17396  
96588,1.1358951999O,1.4694069752,-0.8845749332,0.4960809892O,3.70626  
00974,-0.9550926067,0.6329791055C,2.5605514634,-1.4801936622,0.690253  
7341C,2.4700763515,-2.9741264979,1.0313016366C,3.8105175599,-3.67659  
45807,1.2004357235H,1.8754928348,-3.4500270239,0.241980312H,1.869763  
9197,-3.0560587338,1.9462862439H,4.4059358902,-3.6090283844,0.2848404  
366H,3.670081848,-4.7371239333,1.441630296H,4.3951943691,-3.21584278  
97,2.0020964493\\Version=ES64L-G09RevE.01\\State=-1-\\AHF=-1738.3778944R  
MSD=7.134e-09\\RMSF=2.984e-06\\Dipole=-1.122167,0.470444,-0.0660437\\Quad  
rupole=-24.5349361,4.0905982,20.4443379,-14.7604008,2.5360805,3.382577  
4PG=C01 [X(C13H18F5N2O3S1)]\\@

## 2\_propanoate.M062X\_6-31pGd\_opt

I\\G1NC-R3739\\FOpt\\RM062X\\Gen\\C13H18F5N2O3S1(1-)\\ROOT\\24-Feb-2019\\O\\  
# M062X/Gen 6D SCF=Tight INT(grid=ultrafine) OPT=CalcFC IOP(2/17=4) ma  
xdisk=3221225472\\4SF5\_EtO.M062X\_6-31pGd\_opt\\-1,\\C,-2.151296941,2.30  
95142078,-0.0573528405C,-0.7953929468,1.6567221286,0.2006703446C,0.3  
548580319,2.5558104354,-0.2394818505N,1.6154617928,1.8883593001,-0.00  
82548755C,2.7801577031,2.5582794943,-0.1637114767O,2.8427061826,3.75  
57736752,-0.4530208579N,3.8939805714,1.7505709156,0.0458980546C,5.21  
63114766,2.1155412829,-0.0330097143C,5.6776874046,3.4113670574,-0.345  
971881C,6.1668280549,1.099411583,0.2228299353C,7.5230331365,1.363270  
9617,0.1698934078C,7.9540384962,2.6530361608,-0.1420416404C,7.041232  
2648,3.670460576,-0.3987548187H,-2.9736439462,1.662974661,0.266124033  
8H,-2.2902962685,2.5190623382,-1.1246063386H,-2.2403602744,3.2608684  
611,0.4807972837H,-0.7242485288,0.6965027472,-0.3235662692H,-0.67799  
37055,1.427327562,1.2666055465H,0.337655226,3.5033699794,0.3146366946  
H,0.2432156776,2.8161821886,-1.3040349293H,1.6058141109,0.864801649,  
0.1612600896H,3.7232780591,0.7495609896,0.2838346355H,4.9595232093,4

.1951658581,-0.5428399418H,5.8058112455,0.1019396644,0.46201987H,8.2  
377583626,0.5721673915,0.3692801622S,9.7121773705,3.0029328835,-0.212  
948922H,7.3857402984,4.6703018059,-0.6408005681F,10.0479403791,1.651  
594056,-1.0429119704F,11.3043194464,3.3181035625,-0.2764601328F,9.59  
42611482,3.8282461469,-1.6035595817F,9.5712205368,4.3936388096,0.6083  
691274F,10.0243717548,2.2164879847,1.1698250178O,1.4441052715,-0.881  
3832337,0.4356849929O,3.6775535182,-0.9412515342,0.6604293601C,2.533  
2988932,-1.4713638705,0.6503898572C,2.4453177266,-2.9810399659,0.9264  
480064C,3.7888947658,-3.6586710454,1.1654597002H,1.9206677914,-3.432  
7630668,0.0755002613H,1.7793020392,-3.1105179863,1.7886231692H,4.443  
6190886,-3.5346824125,0.29796601H,3.6639257859,-4.7311977792,1.358881  
4572H,4.3023257903,-3.2071056234,2.0191915912\\Version=ES64L-G09RevE.  
01\\State=-1-\\AHF=-1738.3394464\\RMSD=7.802e-09\\RMSF=1.515e-06\\Dipole=-1.1  
547189,0.4921597,-0.0581641\\Quadrupole=-26.3736143,4.2078613,22.165753  
,-14.8219137,2.2866939,3.8471914\\PG=C01 [X(C13H18F5N2O3S1)]\\@

## 2\_propanoate.M062X\_6-31pGd\_bsse

I\\G1NC-R3757\\SP\\RM062X\\Gen\\C13H18F5N2O3S1(1-)\\ROOT\\25-Feb-2019\\O\\#  
M062X/Gen 6D SCF=Tight INT(grid=ultrafine) Counterpoise=2 maxdisk=6710  
88640\\4SF5\_EtO.M062X\_6-31pGd\_bsse\\-1,\\C,-2.151296941,2.3095142078  
,-0.0573528405C,-0.7953929468,1.6567221286,0.2006703446C,0.0.35485  
80319,2.5558104354,-0.2394818505N,1.6154617928,1.8883593001,-0.0082  
548755C,0.2.7801577031,2.5582794943,-0.1637114767O,2.8427061826,3.  
7557736752,-0.4530208579N,0.3.8939805714,1.7505709156,0.0458980546C,  
0.5.2163114766,2.1155412829,-0.0330097143C,0.5.6776874046,3.411367057  
4,-0.345971881C,0.6.1668280549,1.099411583,0.2228299353C,0.7.5230331  
365,1.3632709617,0.1698934078C,0.7.9540384962,2.6530361608,-0.1420416  
404C,0.7.0412322648,3.670460576,-0.3987548187H,0,-2.9736439462,1.662  
974661,0.2661240338H,0,-2.2902962685,2.5190623382,-1.1246063386H,0,-  
2.2403602744,3.2608684611,0.4807972837H,0,-0.7242485288,0.6965027472,  
-0.3235662692H,0,-0.6779937055,1.427327562,1.2666055465H,0,0.3376552  
26,3.5033699794,0.3146366946H,0,0.2432156776,2.8161821886,-1.30403492  
93H,0,1.6058141109,0.864801649,0.1612600896H,0,3.7232780591,0.749560  
9896,0.2838346355H,0,4.9595232093,4.1951658581,-0.5428399418H,0,5.80  
58112455,0.1019396644,0.46201987H,0,8.2377583626,0.5721673915,0.36928  
01622S,0,9.7121773705,3.0029328835,-0.212948922H,0,7.3857402984,4.67  
03018059,-0.6408005681F,0,10.0479403791,1.651594056,-1.0429119704F,0  
,11.3043194464,3.3181035625,-0.2764601328F,0,9.5942611482,3.828246146  
9,-1.6035595817F,0,9.5712205368,4.3936388096,0.6083691274F,10,10.0243  
717548,2.2164879847,1.1698250178O,0,1.4441052715,-0.8813832337,0.4356  
849929O,0,3.6775535182,-0.9412515342,0.6604293601C,0,2.5332988932,-1  
4713638705,0.6503898572C,0,2.4453177266,-2.9810399659,0.9264480064C  
,0.3.7888947658,-3.6586710454,1.1654597002H,0,1.9206677914,-3.4327630  
668,0.0755002613H,0,1.7793020392,-3.1105179863,1.7886231692H,0,4.443  
6190886,-3.5346824125,0.29796601H,0,3.6639257859,-4.7311977792,1.3588  
814572H,0,4.3023257903,-3.2071056234,2.0191915912\\Version=ES64L-G09R  
evE.01\\State=-1-\\AHF=-267.7284824\\RMSD=4.01915912\\Dipole=-1.1526371,0.463  
6717,-0.0531301\\Quadrupole=-26.4117661,4.3625971,22.049169,-14.6538166  
,2.2545629,3.7915317\\PG=C01 [X(C13H18F5N2O3S1)]\\@

## 2\_propanoate.M062X\_6-31pGd\_opt\_water

I\\G1NC-R4227\\FOpt\\RM062X\\Gen\\C13H18F5N2O3S1(1-)\\ROOT\\01-Mar-2019\\O\\  
# M062X/Gen 6D SCF=Tight INT(grid=ultrafine) OPT=(CalcFC,MaxStep=1) IO  
P(2/17=4) SCRF=(SMD,Solvent=h2o) maxdisk=3221225472\\4SF5\_EtO.M062X\_6-  
31pGd\_opt\_water\\-1,\\C,-2.1381338244,2.3236995085,-0.152020739C,-0.  
799218178,1.611481992,0.011650082C,0.3617149145,2.5702167624,-0.21030  
17273N,1.6315453223,1.8755863898,-0.0527003912C,2.7963764252,2.53755  
07366,-0.1852644659O,2.849768116,3.7523478117,-0.4518108161N,3.91840  
21746,1.7503993719,-0.0061384464C,5.2506577073,2.1345969146,-0.074482  
4801C,5.6991120066,3.4610638604,-0.2002690843C,6.2038152494,1.099882  
6377,0.0082209262C,7.5607176122,1.369338635,-0.0362036387C,7.9761180  
351,2.6927905561,-0.1670233809C,1.067177913,3.7354691482,-0.24770339  
93H,-2.9727101604,1.6346425676,0.0083237466H,-2.23725854,2.744811246  
1,-1.1586903437H,-2.2355922601,3.1444052088,0.5673719042H,-0.7253069  
68,0.781184436,-0.7015338871H,-0.7241937473,1.1785003684,1.0167991854  
H,0.3029490002,3.3997018477,0.5054692413H,0.300541768,3.0048593684,-  
1.2158113281H,1.6176877459,0.8755424123,0.1905413021H,3.7542894629,0  
7422275425,0.1450305515H,4.994374935,4.2773102305,-0.2567855797H,5.  
8667093368,0.072384569,0.107713574H,8.2727383898,0.5533648484,0.02843  
3171S,9.7347538254,3.0585248721,-0.2291364213H,7.3894907783,4.765356  
2821,-0.3434851091F,10.0466691253,1.8444203924,-1.2534754538F,11.321  
6096496,3.3868166117,-0.2848708669F,9.5770724057,4.0723532277,-1.4812  
927118F,9.6075119913,4.3107758206,0.7885954782F,10.0766950147,2.0828

788667,1.0168385746\O,1.3793554726,-0.9140870554,0.6738004822\O,3.5952  
538544,-1.0605608813,0.4200796381\C,2.472446261,-1.553234792,0.7279550  
455\C,2.3991337635,-3.0049023913,1.1924646453\C,3.7339814035,-3.732476  
0292,1.2611590878\H,1.709854321,-3.5211604728,0.5132792357\H,1.9074735  
062,-3.0014004294,2.1726541671\H,4.2172735211,-3.7675818465,0.27990099  
4\H,3.5901612365,-4.7620336873,1.6039357405\H,4.419610555,-3.237677458  
7,1.956073034\Version=ES64L-G09RevE.01\State=1-A\HF=-1738.4087576\RMS  
D=8.422e-09\RMSF=3.020e-06\Dipole=1.7134045,0.4518131,0.077097\Quadrup  
ole=-23.4089258,5.5455162,17.8634096,-15.4628755,2.9231961,3.1060093\PG  
=C01 [X(C13H18F5N2O3S1)]\@

**4\_propanoate.M062X\_6-31pGd\_bsse**

I\1\GINC-R3726\SP\RM062X\Gen\C14H21N2O5S1(1-)\ROOT\21-Feb-2019\0\# M0  
62X\Gen 6D SCF=Tight INT(grid=ultrafine) Counterpoise=2 maxdisk=671088  
640\4SulfoXyMethyl\_C2\_EtO.M062X\_6-31pGd\_bsse\1,1\C,0,-2.1138528668,  
2.4434768491,-0.4531644221\C,0,-0.802685361,1.7655864782,-0.062487788\  
C,0,0.4040058079,2.6265251475,-0.4203202077\N,0,1.6231580602,1.9352301  
831,-0.0681226456\C,0,2.8099562601,2.5835622122,-0.1088076913\O,0,0.2,92  
17043009,3.7808354687,-0.3827156849\N,0,3.8838902269,1.7527433325,0.19  
93833586\C,0,5.216181756,2.0861075318,0.2337520138\C,0,5.7287989598,3.  
3793641123,-0.0107428266\C,0,6.1179403267,1.0385695424,0.5446519648\C,  
0,7.4798248692,1.2689212297,0.5918133178\C,0,7.9718634871,2.5534125824  
0.3354958792\C,0,7.0987279539,3.5994486594,0.0371819732\H,0,-2.977651  
0508,1.8254326377,-0.1870839435\H,0,-2.1546732342,2.6281344664,-1.5332  
22699\H,0,-2.2242596995,3.4105429737,0.0520580868\H,0,-0.7107125147,0.  
.7911004291,-0.556244375\H,0,-0.7842639142,1.56114586,1.0147958629\H,0  
.3657172143,3.5857654142,0.1114922576\H,0,0.3889570387,2.8661136515,  
-1.4957658914\H,0,1.5786679465,0.9087794191,0.0768556029\H,0,3.6711029  
238,0.7516094153,0.3994669135\H,0,5.0426189351,4.1848994758,-0.2323297  
734\H,0,5.7101143273,0.0505465959,0.745148549\H,0,8.1689685742,0.46727  
59703,0.8431840941\H,0,9.7091872677,2.8260132285,0.2827528983\O,0,10.3  
840507684,1.8209656198,1.1117854336\O,0,9.9834652192,4.2527412407,0.48  
91150243\H,0,7.4985233665,4.5943806571,-0.1400722058\C,0,10.1601922694  
2.4648752997,-1.4168670317\H,0,9.9006283481,1.4274395682,-1.633375751  
2\H,0,11.2390200166,2.620175043,-1.4913672847\H,0,9.621765014,3.150408  
6286,-2.0730373746\O,0,1.3457504508,-0.8391331479,0.2878242112\O,0,3.5  
46600369,-0.9481694174,0.7197278058\C,0,2.3986098687,-1.454439899,0.59  
36834618\C,0,2.2563245208,-2.9658912666,0.8356234396\C,0,3.5588742992,  
-3.6746560307,1.1856018158\H,0,1.8028435575,-3.3943909257,-0.066716052  
H,0,1.5118757206,-3.0936683412,1.6313607666\H,0,4.2926511508,-3.55259  
84477,0.3835115666\H,0,3.395857037,-4.7468828076,1.3502845544\H,0,4.00  
08404284,-3.2454086402,2.0893123672\Version=ES64L-G09RevE.01\State=1-  
A\HF=-267.7284863\RMSD=4.016e-09\Dipole=0.2424068,-0.1686383,-1.351430  
7\Quadrupole=-24.8848572,0.2837493,24.6011079,-16.4363066,-15.7002718,  
0.4063578\PG=C01 [X(C14H21N2O5S1)]\@

**4\_propanoate.M062X\_6-31pGd\_opt\_water**

I\1\GINC-R4188\FOpt\RM062X\Gen\C14H21N2O5S1(1-)\ROOT\19-Feb-2019\0\#  
M062X\Gen 6D SCF=Tight INT(grid=ultrafine) OPT IOP(2/17=4) SCRF=(SMD,S  
olvent=h2o) maxdisk=2684354560\4SulfoXyMethyl\_C2\_EtO.M062X\_6-31pGd\_op  
t\_water\1,1\C,-2.0802836593,2.4217905092,-0.5600885176\C,-0.78034241  
05,1.7079355187,-0.2035011678\C,0.418002092,2.628518306,-0.3841128046\  
N,1.6499019888,1.9288920626,-0.0489419839\C,2.8398307805,2.5528000336,  
-0.1363345099\O,2.951224814,3.7348231475,-0.509446671\N,3.918099112,  
.7612821572,0.2155676901\C,5.2628812879,2.1035899902,0.2204077103\C,5.  
7591752989,3.4079453469,0.0416171655\C,6.1730190039,1.0487957557,0.443  
3411738\C,7.5361664886,1.2806506378,0.4797414576\C,8.0095446068,2.5818  
610478,0.2950740208\C,7.1298190415,3.6383566593,0.0735004149\H,-2.9416  
329058,1.7601917453,-0.4281800373\H,-2.0693760325,2.7572431364,-1.6031  
414156\H,-2.230888476,3.3018894335,0.0749948172\H,-0.6535508195,0.8199  
647947,-0.8351015914\H,-0.816113352,1.3596253197,0.8361321854\H,0.3077  
655984,3.5147744926,0.253669328\H,0.4665013533,2.9800975862,-1.422014  
6236\H,1.585663414,0.9709384719,0.3220910606\H,3.7129297285,0.76524925  
21,0.3964279864\H,5.0828304741,4.2347778319,-0.1172384719\H,5.79237292  
66,0.0422252494,0.5901610987\H,8.2235957937,0.4584215749,0.6555007774\  
S,9.7495416033,2.8771491662,0.2856111205\O,10.4000255867,1.8693482534,  
1.1463630489\O,9.9857882913,4.2996359507,0.6006695769\H,7.5065786514,4  
6475330744,-0.0647829536\C,10.2762954866,2.587910104,-1.3860416635\H,  
10.0404077467,1.5537790152,-1.6454164513\H,11.3555068392,2.7612219564,  
-1.4143149054\H,9.750923847,3.2882294173,-2.0384521966\O,1.2769936083,  
-0.7494979245,0.9767605476\O,3.4620027896,-1.034154694,0.605725128\C,2  
3.085495213,-1.4781453674,0.8714555677\C,2.1202220565,-2.9774323951,1.

0824843342\C,3.3851275659,-3.8137225955,0.9509684728\H,1.3599416996,-3  
.3067544306,0.3639944079\H,1.6707285012,-3.1056156365,2.0745487344\H,3  
8254021883,-3.7124054884,-0.0457648894\C,3.161073621,-4.8724717206,1.  
115411482\H,4.1389141481,-3.510356746,1.6840749383\Version=ES64L-G09R  
Ev.E.01\State=1-A\HF=-1429.6968354\RMSD=9.371e-09\RMSF=3.091e-06\Dipole  
=0.793754,-0.4363049,-2.3607874\Quadrupole=-19.6460447,0.2286701,19.41  
73746,-17.092765,-19.793628,-0.6143231\PG=C01 [X(C14H21N2O5S1)]\@

**4.M062X\_6-31pGd\_opt**

I\1\GINC-R3717\FOpt\RM062X\Gen\C11H16N2O3S1\ROOT\30-Oct-2018\0\# M062  
X\Gen 6D SCF=Tight INT(grid=ultrafine) OPT IOP(2/17=4) maxdisk=2147483  
648\4SulfoXyMethyl.M062X\_6-31pGd\_opt\0,1\C,-2.004263388,1.8464310338  
-0.0619611429\C,-0.6364865026,1.173271879,-0.1508238027\C,0.491430347  
4.2.1644063527,0.1050600288\N,1.7859964779,1.5005241731,0.1010388262\C,  
2.9256908545,2.2693583333,0.0027417071\O,2.9039951239,3.4856778398,-0.  
0561231676\N,4.0946538437,1.5149515788,0.0320442189\C,5.4106605759,1.9  
866672237,0.0576662473\C,5.7447564566,3.3304413867,0.288498485\C,6.43  
08061142,1.0385648995,-0.1264199383\C,7.7642466362,1.4151355017,-0.087  
9587748\C,8.0827586951,2.7526253088,0.1344028277\C,7.01638871806,3.7024  
376149,0.3284910275\H,-2.8095746333,1.1299437332,-0.2454841161\H,-2.09  
32757984,2.6490466794,-0.8015645517\H,-2.1638570882,2.2849385298,0.928  
8121993\H,-0.4976929599,0.7231664482,-1.1409418453\H,-0.582099623,0.35  
65017316,0.5825208025\H,0.3699568775,2.6405506529,1.0884724605\H,0.478  
7227364,2.9636249124,-0.6409158263\H,1.8432166431,0.5770077191,0.42231  
31816\H,3.9962960489,0.5214934954,-0.1316070473\H,4.9642025641,4.06354  
60007,0.4350274309\H,6.172380869,-0.0046657857,-0.2909881771\H,8.55678  
81999,0.6823373587,-0.2081265147\H,9.7881599085,3.2506208111,0.1597084  
04\O,10.5984677656,2.063190585,0.4320968977\O,9.9005993094,4.44923006  
66,0.9897965512\H,7.3567033401,4.7339662248,0.5334050209\C,10.12212679  
74,3.7447920648,-1.5287554839\H,9.9618936343,2.8881474885,-2.18503237\  
H,11.1683710732,4.0584682241,-1.5517379059\H,9.4649239201,4.5758499335  
-1.7890544113\Version=ES64L-G09RevE.01\State=1-A\HF=-1161.800096\RMS  
D=5.841e-09\RMSF=8.042e-06\Dipole=-0.0421217,-0.1929881,-1.2398018\Qua  
drupole=-4.2302542,4.6076668,-0.3774126,8.1990254,-15.3396003,-3.35054  
94\PG=C01 [X(C11H16N2O3S1)]\@

**4.M062X\_6-31pGd\_opt\_water**

I\1\GINC-R3717\FOpt\RM062X\Gen\C11H16N2O3S1\ROOT\30-Oct-2018\0\# M062  
X\Gen 6D SCF=Tight INT(grid=ultrafine) OPT IOP(2/17=4) SCRF=(SMD,Solve  
nt=h2o) maxdisk=2147483648\4SulfoXyMethyl.M062X\_6-31pGd\_opt\_water\0,  
1\C,-2.0090827246,1.7753965897,-0.0139678909\C,-0.6236195031,1.1420022  
119,-0.0895583396\C,0.4666267849,2.186714157,0.0937141935\N,1.78251760  
34,1.5658040467,0.0016176282\C,2.9072983041,2.2969312163,0.1484766621\  
O,2.8814689615,3.5008316619,0.4418059523\N,4.0802721639,1.5890422342,-  
0.0398578996\C,5.3923282378,2.0503270955,0.0337058381\C,5.7488514022,3  
3943456619,0.2363785129\C,6.4038718122,1.0831301448,-0.1208199396\C,7  
7401571886,1.4397419359,-0.0719761342\C,8.076997449,2.7780715458,0.13  
75191508\C,7.0919023697,3.7506937914,0.2856618498\H,-2.7920095479,1.02  
19890751,-0.1411197895\H,-2.1372893254,2.5310406663,-0.79678599\H,-2.1  
641089363,2.2632786038,0.9546467258\H,-0.4908158232,0.6475374156,-1.05  
98686592\H,-0.5194599433,0.3715641926,0.683951544\H,0.3666524498,2.668  
769452,1.0723012931\H,0.3722790853,2.9686245235,-0.6701474329\H,1.8391  
028178,0.6078194885,-0.3270360986\H,3.9835291075,0.5961913928,-0.23089  
0185\H,4.9897709106,4.1531251738,0.354583452\H,6.1293323926,0.0433912  
137,-0.2762423854\H,8.5104150361,0.6830502948,-0.1868484746\H,9.779273  
2296,3.2518373349,0.1620831634\O,10.5813882382,2.0813011539,0.56720220  
75\O,9.9103605622,4.4828812764,0.9651383233\H,7.3634255177,4.789965106  
2,0.4462051552\C,10.189900076,3.649324356,-1.5201109789\H,10.03197629  
56,2.7562618857,-2.1316508822\H,11.2419794252,3.9444204197,-1.52857537  
96\H,9.5491383824,4.668936602,-1.8455651922\Version=ES64L-G09RevE.01\  
State=1-A\HF=-1161.8383679\RMSD=4.572e-09\RMSF=7.413e-06\Dipole=-3.218  
0021,-2.8364289,-2.9900456\Quadrupole=-6.9046103,6.101839,0.2937713,12  
486628,-16.9460975,-3.1831732\PG=C01 [X(C11H16N2O3S1)]\@

**4.M062X\_6-31pGd\_opt\_Pentadecane**

I\1\GINC-R3714\FOpt\RM062X\Gen\C11H16N2O3S1\ROOT\22-Feb-2019\0\# M062  
X\Gen 6D SCF=Tight INT(grid=ultrafine) OPT IOP(2/17=4) SCRF=(SMD,Solve  
nt=n-Pentadecane) maxdisk=2147483648\4SulfoXyMethyl.M062X\_6-31pGd\_opt  
\_Pentadecane\0,1\C,-2.0094015236,1.8061928988,-0.064431641\C,-0.62708  
81574,1.1712437993,-0.1852478087\C,0.4758064504,2.1658152331,0.1538330  
504\N,1.7836947257,1.5344376014,0.0370685661\C,2.9158322605,2.30211498  
93,0.0237807635\O,2.8932831982,3.5232559359,-0.0131569296\N,4.08721272  
48,1.5534946109,0.0210343662\C,5.402352006,2.0178516025,0.0515540155\C



.5,7478906558,3.3639046415,0.2546616266\C,6.417983416,1.0580505502,-0.1063397219\C,7.7532159799,1.4256116998,-0.0666913664\C,8.0821837791,-2.765328672,0.1317351435\C,7.0892013566,3.7271296133,0.2960940256\H,-2.961171149,1.0880962995,-0.3139424654\H,-2.108957056,2.6612820793,-0.7419233248\H,-2.1927264978,2.1633236152,0.9549365617\H,-0.4686486654,0.7978580755,-1.2041029323\H,-0.560386932,0.305951614,0.4885247734\H,0.3292032849,2.5692105532,1.1658224915\H,0.4542864425,3.0120321631,-0.5381541291\H,1.8550502722,0.5769142714,0.3608189278\H,3.9873528949,0.5531653788,-0.102773457\H,4.9743159811,4.1077408556,0.3820771294\H,6.1517673663,0.0139263256,-0.2524475498\H,8.537016736,0.6810790289,-0.1714001303\H,9.7898164963,3.2509371787,0.1558784754\O,10.592994628,2.0680502749,0.4806456033\O,9.9100529739,4.4685933238,0.9623601928\H,7.3633885899,4.7629792622,0.4755193402\C,10.1501743618,3.6938133719,-1.5367108364\H,9.9896984706,2.8214031574,-2.1730962077\H,1.11999743358,3.9983650105,-1.5603300511\H,9.5040065597,4.5227963125,-1.8316265014\Version=ES64L-G09RevE.01\State=-1-AHF=-1161.8212177\RMSD=2.656e-09\RMSF=3.811e-06\ Dipole=-2.6793962,-1.9653809,-1.4565624\Quadrupole=-4.919226,5.1859827,-0.2667567,9.2908242,-17.0240649,-3.6837728\PG=C01 [X(C11H16N2O5S1)]\@

#### 4\_propanoate.M062X\_6-31pGd\_opt\_Pentadecane

1\1\GINC-R4380\FOpt\RM062X\Gen\C14H21N2O5S1(1-)\ROOT\19-Feb-2019\0\# M062X\Gen 6D SCF=Tight INT(grid=ultrafine) OPT IOP(2/17=4) SCRF=(SMD,Solvent=n-Pentadecane) maxdisk=2684354560\4SulfOxyMethyl\_C2\_EtO.M062X\_6-31pGd\_opt\_Pentadecane\1,1\C,-2.1191212041,2.4466744476,-0.5105533708\C,-0.8030573827,1.7136886036,-0.277172392\C,0.3853789335,2.6670175577,-0.3080067171\N,1.6145254991,1.9387516588,-0.0725293262\C,2.8045911396,2.5772427415,-0.1216427582\O,2.9164868966,3.7798893272,-0.3776439481\N,3.881845101,1.73852052,0.1407134577\C,5.2172304986,2.0726045407,0.1777479694\C,5.7296721432,3.3700944435,-0.0355732234\C,6.1194957095,1.0185163033,0.4572491284\C,7.4816258834,1.247531045,0.5123891392\C,7.9725419298,2.538249833,0.2920266786\C,7.0998567927,3.5907650531,0.0201906628\H,-2.9691393768,1.7573366262,-0.4771459443\H,-2.1236258066,2.936138781,-1.4917533059\H,-2.2866997384,3.2206175266,0.247827114\H,-0.6591310145,0.9296406109,-1.0202225696\H,-0.8245728289,1.2051851112,0.7039879996\H,0.2617730116,3.4573767573,0.4466654542\H,0.433668058,3.1707930686,-1.2829882528\H,1.5554529419,0.9347802803,0.1783090486\H,3.6729851813,0.7333473871,0.3189388017\H,5.0472939863,4.1834923986,-0.2385078581\H,5.7153204304,0.0246953427,0.6324950875\H,8.1676964877,0.4365925378,0.7408918438\H,9.7134294583,2.8188765302,0.281740528\O,10.3660011551,1.7964833152,1.110192942\O,9.9708449041,4.2401810398,0.5484774426\H,7.4948526026,4.5915132704,-0.1328041097\C,10.2107019855,2.5102002323,-1.4091933571\H,9.9658017178,1.4777567566,-1.6659770079\H,11.2909881068,2.6727817188,-1.4535980149\H,9.6880605006,3.2104210577,-2.0636753549\O,1.3308920533,-0.7873575858,0.5889512048\O,3.5649729376,-0.9768971888,0.6180064994\C,2.3971097602,-1.4441264285,0.7127618226\C,2.2434168279,-2.9448452963,0.9971932928\C,3.5514637634,-3.6960925,1.2056904189\H,1.6789272051,-3.3717423668,0.1584343841\H,1.5919786981,-3.0421988609,1.874203718\H,4.1930257811,-3.616883037,0.3231010485\H,3.3665320304,-4.7587619294,1.4036542242\H,4.1100666029,-3.281959431,2.0505610753\Version=ES64L-G09RevE.01\State=-1-AHF=-1429.6517097\RMSD=3.622e-09\RMSF=3.587e-06\Dipole=0.3884804,-0.1737006,-1.6441906\Quadrupole=-21.9838274,-0.6868538,22.6706812,-15.9288085,-16.4634746,-0.0800464\PG=C01 [X(C14H21N2O5S1)]\@

#### 4\_propanoate.M062X\_6-31pGd\_opt

1\1\GINC-R4176\FOpt\RM062X\Gen\C14H21N2O5S1(1-)\ROOT\19-Feb-2019\0\# M062X\Gen 6D SCF=Tight INT(grid=ultrafine) OPT IOP(2/17=4) maxdisk=2684354560\4SulfOxyMethyl\_C2\_EtO.M062X\_6-31pGd\_opt\1,1\C,-2.113828668,2.4434768491,-0.4531644221\C,-0.802685361,1.7655864782,-0.062487788\C,0.4040058079,2.6265251475,-0.4203202077\N,1.6231580602,1.9352301831,-0.0681226456\C,2.8099562601,2.5835622122,-0.1088076913\O,2.9217043009,3.7808354687,-0.3827156849\N,3.8838902269,1.7527433325,0.1993833586\C,5.216181756,2.0861075318,0.2337520138\C,5.7287989598,3.3793641123,-0.0107428266\C,6.1179403267,1.0385695424,0.5446519648\C,7.4798248692,1.2689212297,0.5918133178\C,7.9718634871,2.5534125824,0.3354958792\C,7.0987279539,3.5994486594,0.0371819732\H,-2.9776510508,1.8254326377,-0.1870839435\H,-2.1546732342,2.6281344664,-1.533222699\H,-2.2242596995,3.4105429737,0.0520580868\H,-0.7107125147,0.7911004291,-0.556244375\H,-0.7842639142,1.56114586,1.0147958629\H,0.3657172143,3.5857654142,0.1114922576\H,0.3889570387,2.8661136515,-1.4957658914\H,1.5786679465,0.9087794191,0.0768556029\H,3.6711029238,0.7516094153,0.3994669135\H,5.0426189351,4.1848994758,-0.2323297734\H,5.7101143273,0.0505465959,0.745148549

\H,8.1689685742,0.4672759703,0.8431840941\N,9.7091872677,2.8260132285,0.2827528983\O,10.3840507684,1.8209656198,1.1117854336\O,9.9834652192,4.2527412407,0.4891150243\H,7.4985233665,4.5943806571,-0.1400722058\C,10.1601922694,2.4648752997,-1.4168670317\H,9.9006283481,1.4274395682,-1.6333757512\H,11.2390200166,2.620175043,-1.4913672847\H,9.621765014,3.1504086286,-2.0730373746\O,1.3457504508,-0.8391331479,0.2878242112\O,3.546600369,-0.9481694174,0.7197278058\C,2.3986098687,-1.454439899,0.5936834618\C,2.2563245208,-2.9658912666,0.8365234396\C,3.5588742992,-3.6746560307,1.1856018158\H,1.8028435575,-3.3943909257,-0.066716052\H,1.5118757206,-3.0936683412,1.6313607666\H,4.2926511508,-3.5525984477,0.3835115666\H,3.395857037,-4.7468828076,1.3502845544\H,4.0008404284,-3.2454086402,2.0893123672\Version=ES64L-G09RevE.01\State=-1-AHF=-1429.6073331\RMSD=9.242e-09\RMSF=1.903e-06\Dipole=0.2458627,-0.140379,-1.3548564\Quadrupole=-24.8565935,0.144797,24.7117965,-16.5826747,-15.6744193,0.449004\PG=C01 [X(C14H21N2O5S1)]\@

#### 8.M062X\_6-31pGd\_opt

1\1\GINC-R3710\FOpt\RM062X\Gen\C11H12ClF3N2O1\ROOT\01-Nov-2018\0\# M062X\Gen 6D SCF=Tight INT(grid=ultrafine) OPT IOP(2/17=4) maxdisk=2147483648\3Chloro4TFM.M062X\_6-31pGd\_opt\0,1\C,-1.9565094212,1.8146268118,-0.181558854\C,-0.5874716188,1.1471360095,-0.0715728372\C,0.5329970731,2.1775467633,-0.0188852695\N,1.8294673454,1.5181930741,0.0830748055\C,2.9693909695,2.2662743224,-0.0849748325\O,2.9513398032,3.4305802588,-0.4416576465\N,4.137755468,1.5503650228,0.1597990633\C,5.4529166222,2.0175392486,0.0944684381\C,5.782737842,3.3621239135,-0.118336894\C,6.4791277022,1.0785603989,0.2709580441\C,7.8059660159,1.4739234579,0.2377573699\C,8.1513423775,2.8088001731,0.0291871439\C,7.1210386503,3.7363287784,-0.1463905957\H,-2.7566112053,1.0703399023,-0.2192192228\H,-2.0217048368,2.4246438433,-1.0885961776\H,-2.1459478573,2.4687310968,0.6761336085\H,-0.4192755117,0.4812344065,-0.9262111339\H,-0.5561875629,0.5224546979,0.8321587158\H,0.381796862,8.684103834,0.8227338003\H,0.5447672715,2.7811221557,-0.9303576424\H,1.8741353076,0.7146229583,0.6977232771\H,4.0435096833,0.5499670421,0.2759240191\H,5.0093984609,4.10249002,-0.2665291767\H,6.2350273865,0.0325285559,0.4370557219\H,8.5903192844,0.7380773414,0.375333781\C,7.474195244,5.417584398,-0.4119541926\C,9.6003375943,3.2120749746,-0.0027729808\F,9.9039350019,4.1049015048,0.954245616\F,9.9535906643,3.7587257945,-1.1780024741\F,10.4062053861,2.1504586494,0.1884865257\Version=ES64L-G09RevE.01\State=-1-AHF=-1370.5349342\RMSD=5.397e-09\RMSF=3.745e-06\Dipole=-2.1362019,-2.2848778,0.6484399\Quadrupole=0.0676858,3.7511255,-3.8188112,3.8574915,-2.6584423,-2.1657264\PG=C01 [X(C11H12ClF3N2O1)]\@

#### 8.M062X\_6-31pGd\_opt\_Pentadecane

1\1\GINC-R3780\FOpt\RM062X\Gen\C11H12ClF3N2O1\ROOT\22-Feb-2019\0\# M062X\Gen 6D SCF=Tight INT(grid=ultrafine) OPT IOP(2/17=4) SCRF=(SMD,Solvent=n-Pentadecane) maxdisk=2147483648\3Chloro4TFM.M062X\_6-31pGd\_opt\_Pentadecane\0,1\C,-1.9565476405,1.7863096605,-0.1940024253\C,-0.5761509267,1.1444233029,-0.0892242407\C,0.5216861859,2.1959024882,0.0807610184\N,1.8282730634,1.5589567913,0.1095714807\C,2.965694182,2.2942173909,-0.0659743246\O,2.9552769865,3.4638421331,-0.4195318178\N,4.1328499213,1.5735913674,0.1672046773\C,5.4477708812,2.0306415905,0.0992689095\C,5.7902959486,3.3685445912,-0.142566431\C,6.4684779868,1.0883545287,0.2992476664\C,7.7978531307,1.4725261255,0.2607685087\C,8.1544077287,2.8004811781,0.0230561513\C,7.1308006793,3.7303753749,-0.1753356512\H,-2.7399294161,1.026194992,-0.2669289567\H,-2.0256901634,2.4251728328,-1.081165719\H,-2.1718377723,2.4064219394,0.6831109974\H,-0.3854971267,0.5106110027,-0.963624586\H,-0.5403294027,0.493160168,0.7949146742\H,0.345345463,2.8541857392,0.8710357376\H,0.5284636021,2.8266422723,-0.8843672722\H,1.8786309991,0.701687152,0.646915076\H,4.0319304501,0.5797952969,0.3371171824\H,5.023415595,4.1122556174,-0.3061066774\H,4.17054691218,0.0482913176,0.4864006578\H,8.5743833609,0.7317154886,0.6417005265\H,7.4982751691,5.4064997118,-0.4766038706\C,9.67039219247,3.1931136617,-0.0143649457\F,9.915874452,4.1075523911,0.9224101227\F,9.967617568,3.7145444298,-1.2003746717\F,10.4068580481,2.1343494634,0.2014052839\Version=ES64L-G09RevE.01\State=-1-AHF=-1370.5513012\RMSD=7.045e-09\RMSF=5.047e-06\Dipole=-2.4175183,-2.7274923,0.7610364\Quadrupole=-0.2936846,4.3276253,-4.0339407,4.6099485,-2.7664317,-2.5110591\PG=C01 [X(C11H12ClF3N2O1)]\@

#### 8.M062X\_6-31pGd\_opt\_water

1\1\GINC-R3721\FOpt\RM062X\Gen\C11H12ClF3N2O1\ROOT\01-Nov-2018\0\# M062X\Gen 6D SCF=Tight INT(grid=ultrafine) OPT IOP(2/17=4) SCRF=(SMD,Solvent=h2o) maxdisk=2147483648\3Chloro4TFM.M062X\_6-31pGd\_opt\_water\0,

1\1C,-1.9529072718,1.7850364894,-0.1521107346\C,-0.5769891008,1.1520883  
555,0.0282790047\C,0.5263306866,2.1856109742,-0.1382417603\N,1.8334815  
591,1.5667482074,0.0483967279\C,2.9664454673,2.28590839,-0.0834257173\  
O,2.9590766261,3.4809694504,-0.4127416873\N,4.1305222423,1.5811895592,  
0.1662286649\C,5.4430704985,2.0419692235,0.1081359436\C,5.79112872,3.3  
922448447,-0.0453046487\C,6.4620975666,1.0836785871,0.2332606953\C,7.7  
926479081,1.4621629972,0.2001303677\C,8.1536994645,2.8020135709,0.0405  
90888\C,7.1329253097,3.7466889145,-0.0774179383\H,-2.7454252713,1.0401  
039575,-0.0349776869\H,-2.0517352336,2.2292738271,-1.1486814305\H,-2.1  
203154201,2.5754031,0.5878289497\H,-0.4334360101,0.3493176397,-0.70504  
34972\H,-0.5005343947,0.6989463089,1.0244572492\H,0.3960697995,2.99710  
65193,0.5882456943\H,0.4799084335,2.6288391368,-1.1390784577\H,1.87198  
66718,0.6108011411,0.3849701229\H,4.0315992983,0.5877023744,0.35434155  
78\H,5.0330190906,4.1564182313,-0.1340041578\H,6.2011588727,0.03665157  
14,0.356401045\H,8.56392445,0.7057711744,0.2968667246\C,7.50526169,5.  
4424274723,-0.2680941106\C,9.6008841939,3.1902630547,0.002311099\F,9.  
938313689,4.0421519515,0.9927850963\F,9.9459878663,3.7988437939,-1.151  
8564575\F,10.4093925979,2.1240291817,0.1259484427\Version=ES64L-G09Re  
v.E.01\State=1-A\HF=-1370.554552\RMDS=7.957e-09\RMSEF=2.551e-06\Dipole=  
-2.6963403,-3.8839872,0.8325572\Quadrupole=-0.6090646,6.140591,-5.5315  
265,7.4986795,-2.8790258,-1.7701773\PG=C01 [X(C14H17C11F3N2O3)]\@

### 8\_propanoate.M062X\_6-31pGd\_bsse

1\1\GINC-R4273\SP\RM062X\Gen\C14H17C11F3N2O3(1-)\ROOT\19-Feb-2019\0\#  
M062X\Gen 6D SCF=Tight INT(grid=ultrafine) Counterpoise=2 maxdisk=671  
088640\3Chloro4TFM\_EtO.M062X\_6-31pGd\_bsse\1,1\C,0,-1.989832681,1.96  
06498839,-0.0564907278\C,0,-0.590289146,1.351388508,-0.0214347335\C,0,  
0.4902445132,2.4267913415,-0.0027834451\N,0,1.7962943343,1.8095238128,  
0.0369814133\C,0,2.9107608736,2.574531478,-0.0040956732\C,0,2.88565187  
52,3.8046597668,-0.0886940666\N,0,4.0801857607,1.8232504152,0.05711534  
04\C,0,5.3720860894,2.2884633263,0.0363643092\C,0,5.7314470864,3.64873  
17467,-0.0540583671\C,0,6.398324837,1.3206169389,0.1113023608\C,0,7.72  
5337109,1.7036721772,0.0957384305\C,8.097394868,3.0510159569,0.0060  
11418\C,0,7.0725261397,3.9986480353,-0.067209148\H,0,-2.7625046688,1.1  
850337441,-0.0725351081\H,0,-2.1247199762,2.5872913702,-0.9461660936\H  
0,-2.1667542569,2.5919777062,0.8223967085\H,0,-0.4332406542,0.7018274  
098,-0.8907437132\H,0,-0.4735466011,0.707945985,0.8585569345\H,0,0.353  
9532119,3.0868152671,0.8670828433\H,0,0.4080354325,3.0671970783,-0.892  
2373692\H,0,1.8549546737,0.7791600508,0.1303684886\H,0,3.98434931,0.78  
51624845,0.1273522798\H,0,4.9622986246,4.064283156,-0.1125912534\H,0,  
6.1178595688,0.2726798622,0.1811329499\H,0,8.5000786885,0.9465204157,0.  
.1539562912\C,0,7.4530166084,5.7053972204,-0.1814398905\C,0,9.5427361  
84,3.4331676518,-0.0088204351\F,0,9.9089549339,4.0890275034,-1.1312066  
675\F,0,10.3473175645,2.3509835418,0.0693572132\F,0,9.8932321363,4.232  
7396064,1.0217285242\O,0,1.8115805738,-0.9971868191,0.2886451692\O,0,4  
.055997177,-0.9293360528,0.2502002687\C,0,2.9475692911,-1.5310771349,0.  
3142376443\C,0,0.0238679183,-3.0615253306,0.433393891\C,0,1.668557869  
4,-3.7525016718,0.5167903866\H,0,3.63712131,-3.2856534575,1.3149398674  
\H,0,3.5991500392,-3.4226285226,-0.4281502128\H,0,1.1051389506,-3.3929  
272394,1.3827211768\H,0,1.7814920046,-4.8405433252,0.5990281609\H,0,1.  
0668227074,-3.5289390473,-0.3688651662\Version=ES64L-G09Rev.E.01\State  
=1-A\HF=-267.7284768\RMDS=3.841e-09\Dipole=0.4336193,0.1460925,-0.0227  
397\Quadrupole=-14.7936018,-6.6211777,21.4147795,-18.355143,1.1914903,  
1.969942\PG=C01 [X(C14H17C11F3N2O3)]\@

### 8\_propanoate.M062X\_6-31pGd\_opt\_water

1\1\GINC-R4140\FOpt\RM062X\Gen\C14H17C11F3N2O3(1-)\ROOT\19-Feb-2019\0\  
# M062X\Gen 6D SCF=Tight INT(grid=ultrafine) OPT IOP(2/17=4) SCRF=(SM  
D,Solvent=h2o) maxdisk=2684354560\3Chloro4TFM\_EtO.M062X\_6-31pGd\_opt\_w  
ater\1,1\C,-1.9388764401,1.93787865,-0.1551202771\C,-0.5493086506,1.  
3257552323,-0.0105597593\C,0.536020264,2.3801200217,-0.1742261312\N,1.  
8522244831,1.771040747,-0.047483494C,2.696660838,2.5152395917,-0.145  
6332116\O,2.9464745734,3.7372030603,-0.3777147953\N,4.1406289395,1.794  
8922265,0.0143724458\C,5.4360263601,2.2909599938,0.0172263478\C,5.7526  
293093,3.6498518212,0.179886704C,6.4829294583,1.3611320191,-0.113948  
072\C,7.8025460082,1.7773966875,-0.0913863679\C,8.1291035794,3.1281122  
399,0.0545380602\C,7.0829794092,4.0427857954,0.1928816852\H,-2.7174698  
467,1.1785173214,-0.0359779549\H,-2.0638121237,2.3971438758,-1.1420427  
152\H,-2.1057865252,2.7132436344,0.6008589578\H,-0.4046238157,0.538504  
7926,-0.7608223547\H,-0.4483427147,0.8528572661,0.9741794152\H,0.41217  
46647,3.1652726447,0.5827331533\H,0.4487592156,2.8591276932,-1.1567475  
272\H,1.9125054374,0.7949622307,0.2695184602\H,4.0492529354,0.76513374  
27,-0.002082945\H,4.9746996939,4.3895413864,0.3033481136\H,6.251070369

8,0.3069805874,-0.2288158457\H,8.5938388108,1.0428844683,-0.1960194679  
\C,7.4107660529,5.7468781029,0.401496427\C,9.5634284567,3.5587246579,  
0.0638990396\F,9.8519789054,4.4347004468,-0.9222093082\F,10.4013092282  
.2,5198463172,-0.0949760896\F,9.9206885365,4.1625607661,1.2175732183\O  
.1,9092852956,-0.9757194733,0.8789555784\C,3.8756508977,-1.0434271836,  
-0.1804866083\C,2.8596206606,-1.6039886977,0.3348919728\C,2.8172253821  
-3.1277232042,0.2799426235\C,1.5483922559,-3.759728812,0.8336511077\H  
.3,6992602467,-3.4886382619,0.823210485\H,2.9709970374,-3.415389277,-  
0.7667485107\H,1.4073402071,-3.5071686521,1.8890460386\H,1.5974670843,  
-4.8500541791,0.750828734\H,0.6647355195,-3.4184306295,0.2852914582\W  
ersion=ES64L-G09Rev.E.01\State=1-A\HF=-1638.4133092\RMDS=6.419e-09\RMSEF  
=2.688e-06\Dipole=0.8650381,-0.0233224,-0.0273266\Quadrupole=-7.161178  
2,-6.3968642,13.5580423,-17.8069272,2.4995487,4.0418626\PG=C01 [X(C14H  
17C11F3N2O3)]\@

### 8\_propanoate.M062X\_6-31pGd\_opt

1\1\GINC-R3736\FOpt\RM062X\Gen\C14H17C11F3N2O3(1-)\ROOT\19-Feb-2019\0\  
# M062X\Gen 6D SCF=Tight INT(grid=ultrafine) OPT IOP(2/17=4) maxdisk=  
2684354560\3Chloro4TFM\_EtO.M062X\_6-31pGd\_opt\1,1\C,-1.989832681,1.9  
606498839,-0.0564907278\C,0,-0.590289146,1.351388508,-0.0214347335\C,0,4  
902445132,2.4267913415,-0.0027834451\N,1.7962943343,1.8095238128,0.036  
9814133\C,0,2.9107608736,2.574531478,-0.0040956732\C,0,2.8856518752,3.8046  
597668,-0.0886940666\N,4.0801857607,1.8232504152,0.0571153404\C,5.3720  
860894,2.2884633263,0.0363643092\C,5.7314470864,3.6487317467,-0.054058  
3671\C,6.398324837,1.3206169389,0.1113023608\C,7.725337109,1.703672177  
2,0.0957384305\C,8.097394868,3.0510159569,0.006011418\C,7.0725261397,  
3.9986480353,-0.067209148\H,-2.7625046688,1.1850337441,-0.0725351081\H  
,-2.1247199762,2.5872913702,-0.9461660936\H,-2.1667542569,2.5919777062  
.0,8223967085\H,-0.4332406542,0.7018274098,-0.8907437132\H,-0.47354660  
11,0.707945985,0.8585569345\H,0.3539532119,3.0868152671,0.8670828433\H  
0.4080354325,3.0671970783,-0.8922373692\H,1.8549546737,0.7791600508,0.  
1303684886\H,3.98434931,0.7851624845,0.1273522798\H,4.9622986246,4.440  
64283156,-0.1125912534\H,6.1178595688,0.2726798622,0.1811329499\H,8.50  
00786885,0.9465204157,0.1539562912\C,7.4530166084,5.7053972204,-0.181  
4398905\C,9.542736184,3.4331676518,-0.0088204351\F,9.9089549339,4.0890  
275034,-1.1312066675\F,10.3473175645,2.3509835418,0.0693572132\F,9.893  
2321363,4.2327396064,1.0217285242\O,1.8115805738,-0.9971868191,0.28864  
51692\O,4.055997177,-0.9293360528,0.2502002687\C,2.9475692911,-1.53107  
71349,0.3142376443\C,0.0238679183,-3.0615253306,0.433393891\C,1.668557  
8694,-3.7525016718,0.5167903866\H,3.63712131,-3.2856534575,1.314939867  
4\H,3.5991500392,-3.4226285226,-0.4281502128\H,1.1051389506,-3.3929272  
394,1.3827211768\H,1.7814920046,-4.8405433252,0.5990281609\H,1.0668227  
074,-3.5289390473,-0.3688651662\Version=ES64L-G09Rev.E.01\State=1-A\HF  
=-1638.3433304\RMDS=8.139e-09\RMSEF=4.521e-06\Dipole=0.4298962,0.174182  
2,-0.024709\Quadrupole=-14.7198236,-6.8123981,21.5322217,-18.4739804,1  
.1978318,1.9907527\PG=C01 [X(C14H17C11F3N2O3)]\@

### 8\_propanoate.M062X\_6-31pGd\_opt\_Pentadecane

1\1\GINC-R3830\FOpt\RM062X\Gen\C14H17C11F3N2O3(1-)\ROOT\19-Feb-2019\0\  
# M062X\Gen 6D SCF=Tight INT(grid=ultrafine) OPT IOP(2/17=4) SCRF=(SM  
D,Solvent=n-Pentadecane) maxdisk=2684354560\3Chloro4TFM\_EtO.M062X\_6-3  
1pGd\_opt\_Pentadecane\1,1\C,-2.0031928783,2.0070481199,-0.0478391275\  
C,-0.6129673726,1.3821414344,0.0240659696\C,0.4809113579,2.4410149652,  
-0.046624816\N,1.7854106112,1.8157592616,0.023294\C,2.9050713138,2.571  
3046173,-0.0209967105\O,2.8864939657,3.8014674212,-0.1226880069\N,4.07  
17876139,1.8202977397,0.0593031369\C,5.3674380222,2.2828585582,0.04104  
05831\C,5.731132439,3.6400892314,-0.0650425819\C,6.3906811006,1.314814  
6696,0.136552121\C,7.7195921739,1.692340813,0.1257204146\C,8.094056425  
4,3.0372148186,0.0205862476\C,7.0733325808,3.9868285044,-0.0731063016\  
H,-2.7851108565,1.2423351312,0.003373884\H,-2.1392895697,2.5621513824,  
-0.9835517865\H,-2.1654458501,2.7070010916,0.7803942078\H,-0.475337250  
9,0.6670164514,-0.7956829181\H,-0.5005394825,0.8105365471,0.951345782  
\H,0.3649652895,1.596772619,0.7767229187\H,0.3904664452,0.3160122988,  
-0.9787987099\H,1.8398402462,0.7858756091,0.1117578331\H,3.9759982838,  
0.7835413104,0.1434646952\H,4.9670126739,4.4010591266,-0.1393980236\H,  
6.1115230342,0.2678835297,0.2186346607\H,8.489890205,0.9318371003,0.2  
00370411\C,7.4583670719,5.6904244988,-0.2073382804\C,9.5403614468,3.  
417310716,0.0113817105\F,9.9145646889,4.0571567908,-1.117742604\F,10.3  
426968695,2.3377253636,0.1118434659\F,9.882025995,4.2330427336,1.03219  
86114\O,1.826311613,-1.0079501776,0.2625995964\O,4.0670156736,-0.92939  
21706,0.2852255693\C,2.961227803,-1.5416563516,0.3183506308\C,3.046239  
2523,-3.0691197991,0.4373729856\C,1.7002993356,-3.7794503517,0.4769516  
588\H,3.6324839401,-3.2895551619,1.3381905642\H,3.6519444478,-3.424119

6911,-0.405743377H,1.1021669468,-3.4359185417,1.3262496449H,1.830645  
5157,-4.8649071831,0.5630754635H,1.1228400628,-3.5727176694,-0.429058  
3488\Version=ES64L-G09RevE.01|State=1-A|HF=-1638.3832654|RMSD=4.590e-  
09|RMSF=1.895e-05|Dipole=0.3933523,0.0961965,-0.0055991|Quadrupole=-12  
.7059057,-6.8413914,19.5472971,-18.1088359,1.0158494,1.9310515|PG=C01  
[X(C14H17C11F3N2O3)]\@

## 12\_propanoate.M062X\_6-31pGd\_opt\_water

I\1\GINC-R3737\FOpt\RM062X\Gen\C14H16Cl2F3N2O3(1-)\ROOT\19-Feb-2019\0\#  
M062X\Gen 6D SCF=Tight INT(grid=ultrafine) OPT IOP(2/17=4) SCRF=(SM  
D,Solvent=h2o) maxdisk=3221225472\22Cl\_4CF3\_EtO.M062X\_6-31pGd\_opt\_wat  
er\|-1,1,C,-4.3174191736,4.0741337076,-0.8496333166C,-4.4246978671,2.  
733236379,-0.4912660432C,-3.2637131726,1.9930073076,-0.3280683983C,  
-1.9869625583,2.5441561132,-0.5306747744C,-1.934028432,3.8929940966,-  
0.9155827571C,-3.0794384502,4.6660756914,-1.0637027769N,-0.826722899  
9,1.7806255383,-0.384996936C,0.0817473883,2.0682438564,0.6236714393N  
,1.1803811286,1.2967719122,0.6196777098O,-0.1232041118,2.9652626342,1  
.4615223455C,2.207479818,1.4402028434,1.6414358863C,3.3146860279,0.4  
199692845,1.4191087835C,4.4032268232,0.64570391244,2.4798892283H,-0.8  
050276975,0.8225468668,-0.775048871H,1.3325337488,0.6356928727,-0.153  
9374853H,1.7604769619,1.2995925103,2.6331303912H,2.6231258636,2.4553  
782119,1.6123590271H,3.7446820755,0.5657875382,0.4202936963H,2.88516  
85116,-0.5893671234,1.4390890769H,4.8554393351,1.5448692194,2.4592635  
818H,5.1987032684,-0.863224545,2.3173547057H,3.9934865757,0.3836716  
17,3.4828745084H,-5.3949008657,2.2745963978,-0.3246027887H,-2.997496  
006,5.7064087349,-1.3583508042C,-5.5815845573,4.865618132,-1.0185589  
706F,-5.3505134729,6.1618945349,-1.2746369577F,-6.3380444148,4.39512  
40541,-2.0315841023F,-6.3575307349,4.8133479343,0.0820787842Cl,-0.39  
80135384,4.624442995,-1.2721101555Cl,-3.3959387325,0.3317619595,0.167  
5384887O,1.6601530932,-0.5487271631,-1.5469538214O,-0.5511002718,-0.  
8591938478,-1.4388186135C,0.6087613145,-1.2130926524,-1.795796238C,0  
.7870700195,-2.5157261934,-2.5702726871C,-0.4972491362,-3.2737252207,  
-2.8738566482H,1.4766235338,-3.1386779933,-1.9876703871H,1.318678195  
7,-2.2654207024,-3.496160263H,-1.0187378646,-3.5546802924,-1.95360081  
06H,-0.2770760733,-4.1900528514,-3.430644058H,-1.1816036572,-2.66842  
28317,-3.4764989883\Version=ES64L-G09RevE.01|State=1-A|HF=-2097.97629  
45|RMSD=3.288e-09|RMSF=5.520e-06|Dipole=-1.9875927,1.2304853,-0.128265  
9|Quadrupole=-3.4952542,-2.1034025,5.986562,9.4274229,3.6975205,-8.777  
7519|PG=C01 [X(C14H16Cl2F3N2O3)]\@

## 12\_propanoate.M062X\_6-31pGd\_opt

I\1\GINC-R3734\FOpt\RM062X\Gen\C14H16Cl2F3N2O3(1-)\ROOT\19-Feb-2019\0\#  
M062X\Gen 6D SCF=Tight INT(grid=ultrafine) OPT IOP(2/17=4) maxdisk=  
3221225472\22Cl\_4CF3\_EtO.M062X\_6-31pGd\_opt\|-1,1,C,-4.3479994194,3.95  
82982951,-0.8744042446C,-4.4110096018,2.5928867123,-0.6188091548C,-3  
.2328424583,1.881524542,-0.4382440646C,-1.9601551605,2.4861090012,  
5.142580415C,-1.9483449792,3.8652973538,-0.82217638C,-3.1161843117,4.  
5980701516,-0.9769334629N,-0.8063158274,1.7529986695,-0.3454571922C,  
0.1537927619,2.1243518582,0.605788848N,1.2556772731,1.3471121718,0.57  
49605607O,-0.0245133774,3.0506512331,1.3955059385C,2.3202830003,1.54  
99791872,1.530428932C,3.2316926786,0.3275928915,1.5666158528C,4.4001  
766989,0.5256289272,2.529494038H,-0.7494010976,0.7817269844,-0.737989  
8147H,1.3801279579,0.6223956895,-0.1581233855H,1.8832220174,1.737298  
4534,2.5194130148H,2.9076515216,2.4464139248,1.2742074381H,3.5972692  
283,0.1187517317,0.5544387147H,2.6383036667,-0.5471146036,1.858648187  
5H,5.0161179134,1.3818314728,2.229455645H,5.0475009709,-0.3571187163  
,2.559766215H,4.0438834223,0.7161572863,3.5491173875H,-5.3636912947,  
2.0801542543,-0.5448171709H,-3.0564326213,5.6551024233,-1.2131634178C,  
-5.6056277477,4.7579970156,-0.9991667992F,-5.4870444411,5.765259803  
4,-1.8881540904F,-6.6554644964,4.0099250506,-1.3910111759F,-5.970980  
5883,5.3351141746,0.1679226256Cl,-0.445220412,4.6739202976,-1.1314707  
127Cl,-3.3387042702,0.1866379271,-0.0834563029O,1.7227315396,-0.7071  
907687,-1.2689639623O,-0.5162198417,-0.7485486019,-1.465416019C,0.64  
03245223,-1.1986603704,-1.68061957C,0.7559531828,-2.4801227594,-2.524  
1580703C,-0.5758062367,-3.0293487676,-3.0206492399H,1.2840956639,-3.  
2210919899,-1.9108315563H,1.4277517036,-2.2542127471,-3.3615670067H,  
-1.2371622348,-3.254758069,-2.1791260802H,-0.4341337172,-3.9428991663  
,3.6117142586H,-1.0918815882,-2.2890709239,-3.638822245\Version=ES  
64L-G09RevE.01|State=1-A|HF=-2097.8962914|RMSD=5.520e-09|RMSF=4.812e-0  
6|Dipole=-1.4206293,0.9821265,-0.0094694|Quadrupole=-7.1148797,-4.0344  
292,11.1493089,15.4974705,-1.1462459,-8.566641|PG=C01 [X(C14H16Cl2F3N2  
O3)]\@

## 12\_propanoate.M062X\_6-31pGd\_bsse

I\1\GINC-R3710\SP\RM062X\Gen\C14H16Cl2F3N2O3(1-)\ROOT\21-Feb-2019\0\#  
M062X\Gen 6D SCF=Tight INT(grid=ultrafine) Counterpoise=2 maxdisk=671  
088640\22Cl\_4CF3\_EtO.M062X\_6-31pGd\_bsse\|-1,1,C,-4.3479994194,3.958  
2982951,-0.8744042446C,-4.4110096018,2.5928867123,-0.6188091548C,0  
,-3.2328424583,1.881524542,-0.4382440646C,-1.9601551605,2.486109001  
2,-0.5142580415C,-1.9483449792,3.8652973538,-0.82217638C,-0.3.1161  
843117,4.5980701516,-0.9769334629N,-0.8063158274,1.7529986695,-0.34  
54571922C,0.0.1537927619,2.1243518582,0.605788848N,0.1.2556772731,1.  
3471121718,0.5749605607O,-0.0245133774,3.0506512331,1.3955059385C,  
0.2.3202830003,1.5499791872,1.530428932C,0.3.2316926786,0.3275928915,  
1.5666158528C,0.4.4001766989,0.5256289272,2.529494038H,0.0.74940109  
76,0.7817269844,-0.7379898147H,0.1.3801279579,0.6223956895,-0.1581233  
855H,0.1.8832220174,1.7372984534,2.5194130148H,0.2.9076515216,2.4464  
139248,1.2742074381H,0.3.5972692283,0.1187517317,0.5544387147H,0.2.6  
383036667,-0.5471146036,1.8586481875H,0.5.0161179134,1.3818314728,2.2  
29455645H,0.5.0475009709,-0.3571187163,2.559766215H,0.4.0438834223,0.  
7161572863,3.5491173875H,0,-5.3636912947,2.0801524543,-0.5448171709H,  
0,-3.0564326213,5.6551024233,-1.2131634178C,0,-5.6056277477,4.75799  
70156,-0.9991667992F,0,-5.4870444411,5.7652598034,-1.8881540904F,0,-  
6.6554644964,4.0099250506,-1.3910111759F,0,-5.9709805883,5.3351141746  
,0.1679226256Cl,0,-0.445220412,4.6739202976,-1.1314707127Cl,0,-3.338  
7042702,0.1866379271,-0.0834563029O,0.1.7227315396,-0.7071907687,-1.2  
689639623O,0,-0.5162198417,-0.7485486019,-1.465416019C,0.640324522  
3,-1.1986603704,-1.68061957C,0.7559531828,-2.4801227594,-2.52415807  
03C,0,-0.5758062367,-3.0293487676,-3.0206492399H,0.1.2840956639,-3.2  
210919899,-1.9108315563H,0.1.4277517036,-2.2542127471,-3.3615670067H  
,0,-1.2371622348,-3.254758069,-2.1791260802H,0,-0.4341337172,-3.94289  
91663,-3.6117142586H,0,-1.0918815882,-2.2890709239,-3.638822245\Ver  
sion=ES64L-G09RevE.01|State=1-A|HF=-267.7286106|RMSD=3.874e-09|Dipole=  
-1.4149125,0.9562979,-0.0312322|Quadrupole=-7.1835154,-3.8854404,11.06  
89559,15.3543435,-1.2036027,-8.4276522|PG=C01 [X(C14H16Cl2F3N2O3)]\@

## 12.M062X.opt

I\1\GINC-R3771\FOpt\RM062X\Gen\C11H11Cl2F3N2O\ROOT\10-Jul-2018\0\# M  
062X\Gen 6D SCF=Tight INT(grid=ultrafine) OPT IOP(2/17=4) Freq=Noraman  
maxdisk=2147483648\varyl\_urea\_dichloro\_CF3.M062X.opt\0,1,C,-4.102067  
2406,3.4964938621,-1.0116510989C,-4.1881832392,2.2963878828,-0.311816  
3197C,-3.0214728883,1.6101242639,-0.0167946945C,-1.758593676,2.07675  
32369,-0.4168090302C,-1.7179970922,3.270187356,-1.1522819433C,-2.874  
8969743,3.9887428376,-1.434613624N,-0.5905621491,1.3613440121,-0.1313  
400836C,0.3933033967,1.9465020578,0.6982775681N,1.4703050599,1.12572  
41131,0.8895594068O,0.269313819,3.046670427,1.1941120142C,2.61447741  
46,1.6145287809,1.6481988808C,3.5462406832,0.4663436862,2.0139277475  
C,4.7540987215,0.956805829,2.8090990578H,-0.7290152035,0.3678163463,0.  
0176337884H,1.6573645191,0.4407269505,0.167276833H,2.2250858209,2.  
0977315983,2.5485942375H,3.1556051717,2.3834187692,1.0787607796H,3.8  
88858962,-0.0346376214,1.0978882135H,2.9854068112,-0.2767741485,2.59  
29696407H,5.3349701728,1.6855533429,2.2337871682H,5.4185310846,0.128  
2451091,3.0692375277H,4.4390391803,1.4400048224,3.7399644223H,-5.146  
7428617,1.9068030266,0.0147191213H,-2.8082205867,4.9133650486,-1.9964  
027429C,-5.3757632216,4.2363626169,-1.3131299621F,-5.1553088474,5.38  
0496628,-1.9757357508F,-6.2114593595,3.493525124,-2.0626989992F,-6.0  
45221302,4.5448042931,-0.1883502277C,-0.2131578039,3.8497484863,-1.  
7795847456Cl,-3.1284844814,0.1205412621,0.8785847598\Version=ES64L-G  
09RevE.01|State=1-A|HF=-1830.1007854|RMSD=9.502e-09|RMSF=5.760e-06|Dip  
ole=1.2868621,-1.5537144,-0.0445701|Quadrupole=3.4211721,0.4361818,-3.  
857354,-3.8762883,-0.1015435,-2.3401996|PG=C01 [X(C11H11Cl2F3N2O)]\@

## 12\_propanoate.M062X\_6-31pGd\_opt\_Pentadecane

I\1\GINC-R3734\FOpt\RM062X\Gen\C14H16Cl2F3N2O3(1-)\ROOT\19-Feb-2019\0\#  
M062X\Gen 6D SCF=Tight INT(grid=ultrafine) OPT IOP(2/17=4) SCRF=(SM  
D,Solvent=n-Pentadecane) maxdisk=3221225472\22Cl\_4CF3\_EtO.M062X\_6-31p  
Gd\_opt\_Pentadecane\|-1,1,C,-4.3393904945,3.9613965301,-0.8804118321C,  
-4.4195789596,2.6089834342,-0.5682719063C,-3.2465518372,1.8925222006,  
-0.3728647173C,-1.9702985548,2.4770511949,-0.4939112353C,-1.94363944  
86,3.8428130616,-0.8471462349C,-3.1031460243,4.5851389305,-1.01892909  
67N,-0.8182742523,1.7338884961,-0.3156613659C,0.1321506619,2.0935486  
854,0.6430547009N,1.2264885245,1.3042425786,0.6301417666O,-0.0432052  
635,0.0279450914,1.4264930421C,2.3089658197,1.530499273,1.5637034911  
C,3.239635734,0.323250186,1.5925212092C,4.4174533545,0.5425440028,2.5  
376844792H,-0.7641036211,0.7705378032,-0.7238720982H,1.3651767897,0.  
61718265,-0.1343013299H,1.8889813077,1.7150374961,2.5597863932H,2.87

73577109,2.4329448011,1.2889952654\H,3.5990051874,0.121328357,0.576380  
6138\H,2.6652892434,-0.5598273692,1.8977956027\H,5.0165913022,1.406997  
1693,2.2278136424\H,5.0784797011,-0.3302187679,2.5590124385\H,4.073841  
6724,0.7269853833,3.5625246011\H,-5.3788856726,2.1142146599,-0.4607673  
37\H,-3.0351355418,5.633583797,-1.2898003852\H,-5.5901948422,4.7711337  
556,-1.0273743387\H,-5.4646128761,5.7426748804,-1.952488559\H,-6.64912  
36328,4.0212475217,-1.3852742256\H,-5.9395927524,5.3930997629,0.120596  
4458\H,-0.428168206,4.6228622884,-1.1752223195\H,-3.3647565567,0.215  
9927245,0.0642920032\O,1.6802470182,-0.6260495381,-1.3597992507\O,-0.5  
574750989,-0.756465402,-1.4901936276\O,0.6076256996,-1.1659327151,-1.7  
395675622\O,0.7538937027,-2.4463384165,-2.5757856183\O,-0.5604653822,-  
3.0560946283,-3.0434014406\H,1.3219918325,-3.1614140655,-1.9673168243\H,  
1.3990322553,-2.202682969,-3.4289974922\H,-1.1976162696,-3.308523422  
8,-2.1907227702\H,-0.3868201071,-3.9676003487,-3.6283290035\H,-1.11939  
21237,-2.3494590695,-3.6641251243\Version=ES64L-G09RevE.01\State=1-A\HF=-  
2097.9384453\RMSD=3.385e-09\RMSF=2.492e-06\Dipole=-1.5464573,1.049  
7759,-0.0035856\Quadrupole=-5.5270054,-3.8679307,9.3949361,13.7184474,  
0.3227698,-8.7382958\PG=C01 [X(C14H11C12F3N2O)]\@

### 12.M062X\_6-31pGd\_opt\_Pentadecane

1\1\GINC-R3834\FOpt\RM062X\Gen\C11H11C12F3N2O1\ROOT\21-Feb-2019\0\# M  
062X\Gen 6D SCF=Tight INT(grid=ultrafine) OPT IOP(2/17=4) SCRF=(SMD,So  
lvent=n-Pentadecane) maxdisk=2147483648\varyl\_urea\_dichloro\_CF3.M062X\_  
6-31pGd\_opt\_Pentadecane\0,1\,C,-4.112171219,3.4937888923,-0.9966298854  
C,-4.1778437335,2.3001383287,-0.2838755277\O,-3.0006347417,1.62633521  
6,-0.0036678696\O,-1.7473839429,2.09816263208,-0.1541244289\H,1.6376096808  
0,4041640191,0.2174628417\H,2.2661263208,-0.0716704792,5.124511775\H,  
3.2131528752,2.3478197523,1.0349757505\H,3.8455274677,-0.0922122178,1.  
1518002831\H,2.9301869155,-0.2389360996,2.6536187089\H,5.3589426181,1.  
6091572757,2.224360233\H,5.3738916095,0.0850933426,3.1228693014\H,4.44  
88475269,1.4631378937,3.7359581451\H,-5.1275981585,1.9076855576,0.0660  
359468\H,-2.8485508927,4.9121481283,-2.0207091018\O,-5.3964201213,4.21  
16426741,-1.3013828604\O,-5.1911359077,5.4232251945,-1.837507965\H,-6.  
1585195521,3.192055366,-2.171442428\H,-6.1458019876,4.3831762396,-0.  
1972181727\H,-0.242009239,3.8680969921,-1.844154033\H,-3.0806357663,  
0.1479218207,0.9137500663\Version=ES64L-G09RevE.01\State=1-A\HF=-1830  
.1158119\RMSD=5.588e-09\RMSF=5.037e-06\Dipole=1.3428152,-1.8118322,-0.  
0487861\Quadrupole=3.3053743,0.9282065,-4.2335808,-5.0230627,-0.169843  
7,-2.4199572\PG=C01 [X(C11H11C12F3N2O)]\@

### 12.M062X.SMD.h2o\_opt

1\1\GINC-R3771\FOpt\RM062X\Gen\C11H11C12F3N2O1\ROOT\10-Jul-2018\0\# M  
062X\Gen 6D SCF=Tight INT(grid=ultrafine) OPT IOP(2/17=4) Freq=Noraman  
SCRF=(SMD,Solvent=h2o) maxdisk=2147483648\varyl\_urea\_dichloro\_CF3.M06  
2X.SMD.h2o\_opt\0,1\,C,-4.0977807217,3.4993409941,-1.0160881138\O,-4.15  
95492663,2.3656665111,-0.2108722127\O,-2.9829805823,1.6907337813,0.075  
6006447\O,-1.7435113545,2.1005592118,-0.4400087194\O,-1.734432149,3.23  
32346194,-1.2652560628\O,-2.8945732609,3.9446343332,-1.548266367\H,-0.  
5644725679,1.3941720136,-0.1650983682\O,0.4167200142,1.9607875547,0.64  
43347632\H,1.4732647057,1.1684256105,0.8947308805\O,0.3134447017,3.113  
9717649,1.0832477004\O,2.5577073217,1.601727645,1.7685065068\O,3.59749  
35867,0.5001945138,1.9047166607\O,4.7367546623,0.930840559,2.82277271  
5\H,-0.6299085217,0.3800625698,-0.1592141732\H,1.5154037845,0.24175291  
05,0.4843261296\H,2.1483285151,1.8595857708,2.7522934984\H,3.018068246  
6,2.5062893756,1.3546505615\H,3.9897085364,0.2495863934,0.9114814543\H,  
3.1171094215,-0.4027624239,2.3010502347\H,5.2370323657,1.8243951559,2.  
4335342299\H,5.485537761,0.1387110655,2.9155517655\H,4.3641497966,1.1  
626955903,3.8265720078\H,-5.1032224923,2.0211629792,0.2012769021\H,-2.  
8523900011,4.8205804385,-2.1862469485\O,-5.3790756334,4.2191189101,-1.  
3254927657\H,-5.1778286458,5.3810072222,-1.9642695438\H,-6.1924787879,  
3.4786198575,-2.1060546489\H,-6.080388849,4.497071604,-0.2098503194\O,  
0.2476304955,3.7491584066,-1.9979248076\O,3.0454200905,0.302295061  
9,1.1213763392\Version=ES64L-G09RevE.01\State=1-A\HF=-1830.11755567\RM  
SD=5.930e-09\RMSF=1.000e-05\Dipole=1.2433274,-2.7440607,-0.1444095\Qua  
drupole=2.7160312,2.5957037,-5.3117349,-8.554226,0.7462797,-4.2646706\PG=C01 [X(C11H11C12F3N2O)]\@

### 9.M062X\_6-31pGd\_opt

1\1\GINC-R3716\FOpt\RM062X\Gen\C11H13F3N2O3S1\ROOT\30-Oct-2018\0\# M0  
62X\Gen 6D SCF=Tight INT(grid=ultrafine) OPT IOP(2/17=4) maxdisk=26843  
54560\4SulfOxyCF3.M062X\_6-31pGd\_opt\0,1\,C,-2.0010428586,1.8457922452  
-0.0802217512\O,-0.6280795585,1.1881093543,-0.199730912\O,0.490966029  
7,2.1715336782,0.1173105902\H,1.7911286441,1.5222062396,-0.0032823291\H,  
2.9251796531,2.2937181757,0.0193232059\O,2.9015059241,3.5108533237,0.  
0178274491\H,4.1005460897,1.5424107228,0.0071138117\O,5.4113364331,2.  
012427542,0.0606729887\O,5.7425655791,3.3610018192,0.2773447257\O,6.43  
42840347,1.0581770941,-0.0921500446\O,7.7652610177,1.4299920546,-0.031  
0973253\O,8.077142224,2.772448547,0.184766214\O,7.0789643815,3.732583  
1006,0.339631109\H,-2.7997741089,1.1353626376,-0.3098762045\H,-2.09188  
46795,2.6891412553,-0.7726990896\H,-2.1693865933,2.2248341767,0.933325  
1295\H,-0.4814448853,0.7954775369,-1.2128901096\H,-0.5713299435,0.3320  
24479,0.4870890679\H,0.3608399052,2.5921329934,1.1244367314\H,0.478366  
2693,3.0098810218,-0.5843934688\H,1.8513475808,0.5717171322,0.34065927  
27\H,4.0043590024,0.5523619711,-0.1778058341\H,4.9602517835,4.09741663  
48,0.392322073\H,6.1767146157,0.0142069758,-0.2528271913\H,8.558538358  
1,0.6963002065,-0.1368037693\H,9.76696969,3.2587831967,0.2541742781\O,  
10.5974129768,2.1023086784,0.5509458271\O,9.8898497575,4.5227285377,0.  
9612589667\H,7.3514008765,4.7684492823,0.5190100027\O,10.1373533318,3.  
6665644804,-1.5237031214\H,11.4021855692,4.0489420082,-1.6277020261\H,  
9.9370507346,2.5949543986,-2.2878909408\H,9.343684886,4.6485984999,-1.  
9425773257\Version=ES64L-G09RevE.01\State=1-A\HF=-1459.435642\RMSD=3  
887e-09\RMSF=2.086e-06\Dipole=-3.1182809,-2.0747144,-0.3116659\Quadr  
upole=-1.3693055,5.0674997,-3.6981942,8.4847527,-7.1167572,-1.851644\PG  
=C01 [X(C11H13F3N2O3S1)]\@

### 9\_propanoate.M062X\_6-31pGd\_opt

1\1\GINC-R3722\FOpt\RM062X\Gen\C14H18F3N2O5S1(1-)\ROOT\19-Feb-2019\0\#  
M062X\Gen 6D SCF=Tight INT(grid=ultrafine) OPT IOP(2/17=4) maxdisk=3  
21225472\4SulfOxyCF3\_EtO.M062X\_6-31pGd\_opt\0,1\,C,-2.1691580428,2.1  
810960156,-0.1733823084\O,-0.7914550342,1.570937017,0.0726737597\O,0.  
3177351597,2.6023057132,-0.1007763432\H,1.603202987,1.9855124683,0.139  
2993175\O,2.7344897808,2.7119458042,0.0223691841\O,2.7503030106,3.9055  
161652,-0.2836947561\H,3.8826325882,1.9603016066,0.2858758079\O,5.1809  
54749,2.3860311271,0.2540915383\O,5.5881145535,3.7075954017,-0.0510191  
634\O,6.1697122831,1.4119612476,0.5552500623\O,7.5083345313,1.73970275  
9,0.5477635434\O,7.8917700171,3.054541915,0.2430514924\O,6.9340363135,  
4.0297015868,-0.0558990899\H,-2.9625652908,1.4369763493,-0.0491628708\H,  
-2.2452085223,2.585992456,-1.1895595934\H,-2.3672817133,3.0024184558  
0.5255344764\H,-0.6138677842,0.7343160635,-0.6132674411\H,-0.73362407  
5,1.1471316215,1.08212527\H,0.1686571268,3.4436246485,0.5916047111\H,0.  
2896100899,3.0272652259,-1.1144808307\H,1.6290588476,0.9803077213,0.3  
996908577\H,3.749015392,0.9527819221,0.5337145682\H,4.8366087955,4.451  
9331389,-0.2736872316\H,5.8416226446,0.4034861134,0.7952503923\H,8.264  
7291397,0.9973421781,0.7847610882\O,5.5789265659,3.4653461181,0.184526  
0689\O,10.3761053467,2.5088912051,0.9434858863\O,9.7720467454,4.904519  
7223,0.3190031739\H,7.2540835604,5.0429322484,-0.2813910516\O,10.05192  
22831,3.124607404,-1.5834719103\H,1.3436841738,3.4028399037,-1.757713  
2883\H,9.8466232456,1.8438920615,-1.8876045613\H,9.3372177349,3.880624  
0178,-2.4161584001\O,1.5224945097,-0.7257276998,0.8313244276\O,3.76352  
50121,-0.7052025868,0.958976192\O,2.6370430533,-1.2681035167,1.0397457  
567\O,2.6097556227,-2.7542550284,1.4277429683\O,3.9819776283,-3.367210  
2728,1.6779425349\H,2.080420201,-3.2845724696,0.6264329052\H,1.9700579  
114,-2.8419645679,2.3145846953\H,4.6103818334,-3.284606624,0.786509770  
5\H,3.8993262402,-4.4262885453,1.9509056027\H,4.500040785,-2.838869775  
7,2.4834827885\Version=ES64L-G09RevE.01\State=1-A\HF=-1727.2488192\RM  
SD=9.587e-09\RMSF=4.975e-06\Dipole=-0.4793203,0.1375795,-0.8549522\Qua  
drupole=-28.3003504,3.6628616,24.6374888,-18.3517442,-0.1978947,4.18509  
17\PG=C01 [X(C14H18F3N2O5S1)]\@

### 9\_propanoate.M062X\_6-31pGd\_opt\_Pentadecane

1\1\GINC-R3762\FOpt\RM062X\Gen\C14H18F3N2O5S1(1-)\ROOT\19-Feb-2019\0\#  
M062X\Gen 6D SCF=Tight INT(grid=ultrafine) OPT IOP(2/17=4) SCRF=(SMD  
,Solvent=n-Pentadecane) maxdisk=3221225472\4SulfOxyCF3\_EtO.M062X\_6-31  
pGd\_opt\_Pentadecane\0,1\,C,-2.1762893785,2.2119658266,-0.1879332421\O,  
-0.8087695217,1.5953349628,0.0911902431\O,3.135606929,2.6035539924,-  
0.1228098848\H,1.5967662486,1.9842793208,0.1400472748\O,2.7314226193,2.  
7043957697,0.0241657691\O,2.7503623057,3.8955794491,-0.2956788503\H,3.  
8782410308,1.9596172301,0.3019356984\O,5.1789573871,2.3875326411,0.26  
7869456\O,5.5848820174,3.7095211659,-0.0315224708\O,6.1689952974,1.414  
1974777,0.5609841744\O,7.5082071586,1.740832191,0.5485120295\O,7.8887

866795,3.0567308057,0.2478747292,C,6.9307303903,4.0335695462,-0.041203  
39655H,-2.9788099941,1.4841668615,-0.030008053H,-2.2462654684,2.56747  
88123,-1.2227767927H,-2.3665418321,3.0673730613,0.4710969031H,-0.642  
4377626,0.7283846818,-0.5592614259H,-0.7634741459,1.2205366011,1.1206  
6205H,0.175554668,3.4709497673,0.5374409414H,0.28707927,2.9866662808  
-1.1526149298H,1.6199005075,0.9834349151,0.4121371306H,3.7480284733  
.9530120889,0.5516263971H,4.8360964021,4.4577326612,-0.2484121105H  
.5.8462553057,0.4038355674,0.7979887346H,8.2621429286,0.9930337668,0.  
7762959478S,9.5776731545,3.4670638096,1.768619013O,10.3801130472,5  
148136349,0.936484397O,9.7725400824,4.9067637291,0.307657616H,7.2444  
949481,5.0492545228,-0.2642653833C,10.0382696759,3.1207561773,-1.5922  
8067F,1.1.3244648679,3.4133305208,-1.7755375111F,9.8444612124,1.83642  
82772,-1.8841308163F,9.3074169846,3.8638593793,-2.4209053794O,1.5413  
921681,-0.7334091871,0.8668400638O,3.7801513966,-0.7113053259,0.97594  
88462C,2.6572916137,-1.28208788,1.056556896C,2.6342177213,-2.774713  
2485,1.4097288759C,4.0006777407,-3.388379693,1.6827757715H,2.1337697  
729,-3.2902240919,0.5802517705H,1.9710262176,-2.8909079083,2.27556889  
61H,4.6545908943,-3.2889709989,0.8114094189H,3.9109400922,-4.4535153  
428,1.9274051082H,4.4961871302,-2.8849024474,2.184737825\\Version=ES  
64L-G09RevE.01\\State=1-A\\HF=-1727.2878759\\RMSD=6.371e-09\\RMSF=3.993e-0  
6\\Dipole=0.483354,0.1148352,-0.9361986\\Quadrupole=-26.7181429,3.596054  
8,23.1220881,-18.4768833,-0.3529703,3.9343858\\PG=C01 [X(C14H18F3N2O5S1  
)]\\@

### 9\_propanoate.M062X\_6-31pGd\_bsse

1\\GINC-R3748\\SP\\RM062X\\Gen\\C14H18F3N2O5S1(1-)\\ROOT\\21-Feb-2019\\0\\#  
M062X/Gen 6D SCF=Tight INT(grid=ultrafine) Counterpoise=2 maxdisk=6710  
88640\\4SulfOxyCF3\_EiO.M062X\_6-31pGd\_bsse\\-1,C,0,-2.1691518038,2.18  
11031174,-0.1737462307C,0,-0.7914325814,1.570967769,0.0723154464C,0,  
0.3176937215,2.6025303916,-0.1004481368N,0,1.6031642402,1.9857265324,  
0.1395667749C,0,2.7344558547,2.7121655484,0.0227499145O,0,2.75035950  
45,3.9057755048,-0.2831510539N,0,3.8825448409,1.960467313,0.286337017  
7C,0,5.1808865899,2.3860737943,0.2540356783C,0,5.5880636399,3.707594  
3063,-0.0509636564C,0,6.1696105963,1.4119854763,0.5555713965C,0,7.50  
82433857,1.7396537581,0.547927945C,0,7.8916919494,3.0544470563,0.2430  
009639C,0,6.934002035,4.029629163,-0.0554929495H,0,-2.962498214,1.43  
68353866,-0.0500388319H,0,-2.2450251885,2.5864572151,-1.1897544013H,  
0,-2.3675153792,3.0020794468,0.5255081125H,0,-0.6136143249,0.73469037  
55,-0.6139739561H,0,-0.7337567973,1.146688583,1.081570591H,0,0.1684  
049552,3.4435220213,0.5922896477H,0,0.2897560249,3.0279384495,-1.1139  
641222H,0,1.6289763806,0.980466249,0.4000106729H,0,3.7488965096,0.95  
29675207,0.5342245644H,0,4.8365890126,4.4519651527,-0.2736262123H,0,  
5.8414927849,0.4035543246,0.7956826402H,0,8.2646194442,0.9972714055,0  
.7849131261S,0,9.5787905211,3.4652187858,0.1842324503O,0,10.37605514  
74,2.5089280362,0.9433115115O,0,9.7717732963,4.904446373,0.3184680311  
H,0,7.2541364374,5.0428225181,-0.2815557748C,0,10.0515643956,3.12413  
69591,-1.5837269553F,0,11.3432462511,3.402493685,-1.7582007302F,0,9.  
8464110915,1.8433350087,-1.8875738541F,0,9.3366723504,3.8798641911,-2  
.416497161O,0,1.5227077451,-0.7256611959,0.8314776774O,0,3.763713311  
2,-0.7049662198,0.9594712324C,0,2.6372635354,-1.2679690845,1.04005655  
86C,0,2.610093782,-2.7543268697,1.4272777662C,0,3.9822856531,-3.3670  
737938,1.6782002923H,0,2.0815083357,-3.2844038379,0.6253078595H,0,1.  
9697432366,-2.8426497278,2.3135822765H,0,4.6113446628,-3.2838445084,0  
.787291116H,0,3.8996889837,-4.4263133404,1.950554275H,0,4.499604082  
6,-2.8390228401,2.4844073353\\Version=ES64L-G09RevE.01\\State=1-A\\HF=-2  
67.7284139\\RMSD=4.108e-09\\Dipole=0.4785322,0.1091848,-0.8485355\\Quadru  
pole=-28.3467033,3.8168661,24.5298371,-18.1786782,-0.2372481,4.1018176  
\\PG=C01 [X(C14H18F3N2O5S1)]\\@

### 9\_propanoate.M062X\_6-31pGd\_opt\_water

1\\GINC-R3711\\FOpt\\RM062X\\Gen\\C14H18F3N2O5S1(1-)\\ROOT\\19-Feb-2019\\0\\  
# M062X/Gen 6D SCF=Tight INT(grid=ultrafine) OPT IOP(2/17=4) SCRF=(SMD  
,Solvent=h2o) maxdisk=3221225472\\4SulfOxyCF3\_EiO.M062X\_6-31pGd\_opt\_wa  
ter\\-1,C,-2.1536142262,2.1967989739,-0.219191744C,0,-0.7915750904,1.  
5842693725,0.0911322835C,0.3239841986,2.5980562047,-0.1178786092N,1.  
6177519853,1.9998787961,0.1806302128C,2.7491334743,2.7128973702,0.042  
9592822O,2.7564314342,3.8993642514,-0.3281157483N,3.9016701645,2.004  
7964498,0.3515220982C,5.2103843388,2.4393976498,0.2921658274C,5.6084  
648572,3.7483592219,-0.0511538135C,6.1993045984,1.4788032074,0.607932  
1589C,7.5401219923,1.8017935889,0.5775178278C,7.9108496752,3.1079109  
603,0.2335411771C,6.9548301879,4.0758307704,-0.0829947163H,-2.955941  
5239,1.4681789084,-0.069677922H,-2.2003115821,2.5413312395,-1.2582781  
071H,-2.3535591318,3.0566161661,0.4299040379H,-0.6154014494,0.713635

5245,-0.5525344302H,-0.767587446,1.2269330978,1.1279888131H,0.163077  
7078,3.4701749712,0.5279908204H,0.3150915372,2.9561484017,-1.15482272  
26H,1.6451369894,1.0162999906,0.4842302039H,3.7736526533,1.014966001  
9,0.6233401502H,4.8715685805,4.5009081803,-0.2877931715H,5.892860450  
5,0.4729826524,0.8787714038H,8.2899178011,1.0550320763,0.8205993498S  
.9.6001794602,3.5158023533,0.1355374296O,10.4100799111,2.5939245372,0  
.9307409919O,9.7994575741,4.9604955464,0.2404211414H,7.2571107697,5.  
0846659192,-0.3481352023C,10.053096286,3.1194004461,-1.6243157989F,1  
1.3345753788,3.4112765697,-1.8136950348F,9.8552800639,1.8282726837,-1  
.8623449203F,9.3097679712,3.838813664,-2.4568636862O,1.4661417188,-  
0.7712044435,0.9900031691O,3.6995171248,-0.7411747236,1.0677826053C,  
2.5880801979,-1.339293,1.1444930161C,2.5684689084,-2.8353113853,1.443  
4076582C,3.9361106029,-3.4815408907,1.6104992503H,2.0082172176,-3.31  
50179187,0.6319150889H,1.9619721163,-2.970536261,2.3471324494H,4.539  
0143416,-3.3730845791,0.703614967H,3.8297970596,-4.550663958H,1.81981  
19658H,4.4899511204,-3.0286862895,2.4386602473\\Version=ES64L-G09RevE  
.01\\State=1-A\\HF=-1727.322222\\RMSD=3.503e-09\\RMSF=4.698e-06\\Dipole=0.  
8748859,-0.051099,-1.2768538\\Quadrupole=-26.9268021,4.8869258,22.03987  
63,-20.2257718,-1.067181,3.1441385\\PG=C01 [X(C14H18F3N2O5S1)]\\@

### 9.M062X\_6-31pGd\_opt\_water

1\\GINC-R3752\\FOpt\\RM062X\\Gen\\C11H13F3N2O3S1\\ROOT\\30-Oct-2018\\0\\# M0  
62X/Gen 6D SCF=Tight INT(grid=ultrafine) OPT IOP(2/17=4) SCRF=(SMD,Sol  
vent=h2o) maxdisk=2684354560\\4SulfOxyCF3.M062X\_6-31pGd\_opt\_water\\0,1  
\\C,-1.9975838106,1.7789303913,-0.0127286701C,-0.610608386,1.151263683  
4,-0.1041962688C,0.4774723441,2.2028797606,0.0493724132N,1.794425303  
5,1.5849970306,-0.0507827099C,2.9174085035,2.3162594073,0.0822768171  
O,2.8966739987,3.5343150794,0.3030423412N,4.0931013522,1.5907393613,-  
0.0484500269C,5.4000302381,2.0427878792,0.0443302077C,5.7584955071,3  
3777580913,0.3123992442C,6.4105507279,1.076276379,-0.1451335991C,7.  
7449987777,1.4223041057,-0.0729218922C,8.0792526846,2.7536305764,0.19  
91308953C,7.0980120613,3.7285375752,0.3869854927H,-2.7785333445,1.02  
03876371,-0.1196879738H,-2.1422075045,2.5257564623,-0.8010975163H,-2  
.1395495067,2.2758914276,0.9532268312H,-0.4905262078,0.6457302795,-1.  
0702467072H,-0.4900591744,0.3909721104,0.6771576258H,0.3856701649,2.  
7029034106,1.0203619322H,0.3751603128,2.9694357671,-0.7278733862H,1.  
8499577573,0.5882236005,-0.2299259885H,3.9920858528,0.5988920371,-0.2  
445908711H,5.0003113687,4.1312766154,0.4630955418H,6.1327381882,0.04  
5962874,-0.3476741677H,8.5150201005,0.6710577701,-0.2188647192S,9.7  
600087543,3.216919327,0.246920327O,10.101391652,2.056993648,0.4945756  
988O,9.9418658674,4.4522209012,1.0066560192H,7.3737280542,4.75774554  
59,0.5964266491C,10.1360187529,3.700341513,-1.5095086221F,11.4070188  
959,4.0757898479,-1.585240613F,9.9318213922,2.6672029367,-2.317682829  
4F,9.3555844536,4.7090235543,-1.877787806\\Version=ES64L-G09RevE.01\\  
State=1-A\\HF=-1459.4630757\\RMSD=5.273e-09\\RMSF=4.772e-06\\Dipole=-4.230  
0964,-3.3556381,-1.2227587\\Quadrupole=-4.6992877,8.7517511,-4.0524634,  
14.6666191,-5.4570017,-1.2607973\\PG=C01 [X(C11H13F3N2O3S1)]\\@

### 9.M062X\_6-31pGd\_opt\_Pentadecane

1\\GINC-R3711\\FOpt\\RM062X\\Gen\\C11H13F3N2O3S1\\ROOT\\24-Feb-2019\\0\\# M0  
62X/Gen 6D SCF=Tight INT(grid=ultrafine) OPT IOP(2/17=4) SCRF=(SMD,Sol  
vent=n-Pentadecane) maxdisk=2684354560\\4SulfOxyCF3.M062X\_6-31pGd\_opt\_  
Pentadecane\\0,1C,-2.0061981748,1.796604628,-0.0304454332C,-0.621718  
0477,1.1763680691,-0.1945128989C,0.478719936,2.169032394,0.16307919  
7N,1.7892730321,1.5525444029,-0.0069315611C,-0.01962915H,-0.4784882067,0.88  
8122006,-1.2281631813H,-0.5372553218,0.2899043157,0.4490753899H,0.3  
519316236,2.5283644603,1.1905405295H,0.4340002521,3.0410553754,-0.496  
7371391H,1.8617910204,0.5625602264,0.1963535919H,3.9960309947,0.5894  
987318,-0.2535248039H,4.9714015248,4.1239394697,0.3829240437H,6.1557  
964433,0.0389378788,-0.3201574319H,8.5373311926,0.6950842098,-0.18190  
79664S,9.7651307182,3.2458517221,0.2568993833O,10.5947820375,2.08499  
46425,0.5472652741O,9.9045114042,4.5027341008,0.9770787836H,7.358246  
433,4.774320031,0.5317007288C,10.1605313093,3.6711204742,-1.511079876  
1F,11.4310896301,4.0445041947,-1.592286758F,9.9648339614,2.611536376  
-2.292294238F,9.3832395718,4.6655043539,-1.930053176\\Version=ES64L-  
G09RevE.01\\State=1-A\\HF=-1459.4532732\\RMSD=8.416e-09\\RMSF=4.108e-06\\Di

pole=-3.5098275,-2.431978,-0.4821404\Quadrupole=-2.206564,6.1733495,-3.9667855,10.161983,-6.9527574,-1.6965976\PG=C01 [X(C11H13F3N2O3S1)]\@

### 11\_propanoate.M062X\_6-31pGd\_opt\_Pentadecane

1\1\GINC-R4192\FOpt\RM062X\Gen\C13H17ClF5N2O3S1(1-)\ROOT\19-Feb-2019\0\# M062X\Gen 6D SCF=Tight INT(grid=ultrafine) OPT IOP(2/17=4) SCRF=(SMD,Solvent=n-Pentadecane) maxdisk=3221225472\3SF5Chloro\_EtO.M062X\_6-31pGd\_opt\_Pentadecane\1,1\,C,-2.0007278213,2.0547400527,-0.0184641843\,C,-0.5777411189,1.5036284129,-0.0175089311\,C,0.4565901796,2.622678804,3.0.0004912093\N,1.7930461627,2.0645628337,0.0101892724\,C,2.8705285267,2.8778463664,-0.0169609129\O,2.791059776,4.1089514373,-0.068731981\N,4.0752469763,2.1854206656,0.0162461772\,C,5.3436963091,2.7201062622,-0.0105694472\,C,5.6282614384,4.0991899362,-0.0583440081\,C,6.4148447057,1.8014603941,0.0128704209\,C,7.7175920867,2.2631913963,-0.0147698725\,C,8.037161178,3.1673415316,-0.065073255\,C,6.9579158235,4.4907791174,-0.083468746\,H,-2.7390863941,1.2464590788,-0.0341565874\,H,-2.1788251392,2.687777703,-0.8958213466\,H,-2.189551707,2.662856566,0.874083281\,H,-0.4134337698,0.8770133984,-0.902405182\,H,-0.4222197274,0.8546758658,0.8525846375\,H,0.3067504319,3.2608651909,0.8831722762\,H,0.3305987078,3.2696317471,-0.8782722475\,H,1.9067591368,1.0370448138,0.0806751976\,H,4.0392695215,1.1428324834,0.0608155499\,H,4.8152888708,4.8113638169,-0.0753419471\,H,6.1966222243,0.7371647402,0.0530018097\,H,9.0654976958,3.9550267973,-0.0867524461\,S,7.3170026791,6.2697500869,-0.142071083\,F,6.1789835197,6.5598228491,-1.2470798732\,F,8.4130562246,6.0927838361,-1.3220063788\,F,6.2669135599,6.6144502147,1.0328433678\,Cl,9.0281356447,1.1029022099,0.0157832015\,F,7.6506502418,7.8535649445,-0.194006081\,F,8.5014017263,6.1513437952,0.956897042\,O,2.0393990758,-0.7382241659,0.2252522435\,O,4.2729861932,-0.5594283899,0.1595758285\,C,3.2009501684,-1.2196259076,0.252073488\,C,3.3072339438,-2.7426956144,0.4019849841\,C,4.728323248,-3.2709255814,0.543095601\,H,2.8130573098,-3.1832098412,-0.4734886044\,H,2.6932336061,-3.0266403464,1.2651120251\,H,5.3333793297,-2.9975046314,-0.3260137402\,H,4.7344316523,-4.3632341883,0.6400354509\,H,5.2183278025,-2.845168682,1.4242137914\|Version=ES64L-G09RevE.01|State=1-A|HF=-2197.9451674| RMSD=7.563e-09|RMSF=4.809e-06|Dipole=1.0569629,0.8675614,-0.042597|Quadrupole=-0.9175919,-19.3140254,20.2316172,-14.1065776,0.7660678,1.9961472|PG=C01 [X(C13H17ClF5N2O3S1)]\@

### 11\_propanoate.M062X\_6-31pGd\_bsce

1\1\GINC-R371\SP\RM062X\Gen\C13H17ClF5N2O3S1(1-)\ROOT\27-Feb-2019\0\# M062X\Gen 6D SCF=Tight INT(grid=ultrafine) Counterpoise=2 maxdisk=671088640\3SF5Chloro\_EtO.M062X\_6-31pGd\_bsce\1,1\,C,-1.6761737953,3.0057081687,0.4889021821\,C,0,-0.2421517185,2.5179465304,0.6838177214\,C,0,0.3975428859,2.0977390265,-0.641201788\,N,0,1.7597502553,1.639750027,-0.4982758092\,C,0,2.7676576721,2.5357376075,-0.3825018747\,O,0,2.6047099744,3.7582540765,-0.4289795585\,N,4,0.0072648525,1.9295408245,-0.2150029589\,C,0,5.2218592942,2.5547757621,-0.0591671272\,C,0,5.4068287071,3.9526632811,-0.0592890766\,C,0,6.344467644,1.714855843,0.1105594448\,C,0,7.5990728357,2.2718411579,0.2731037807\,C,0,7.8202562795,3.6462578638,0.2794626753\,C,0,6.6933118863,4.4402177143,0.1101819807\,H,0,-2.1346318044,3.3014851187,1.4383981651\,H,0,-2.3022191544,2.221788609,0.0451018796\,H,0,-1.7047769933,3.873293755,-0.1807808727\,H,0,-0.2183213818,1.6642148751,1.3719756751\,H,0,0.3737044453,3.3105073907,1.1234524744\,H,0,0.3797143786,2.9459243794,-1.3365646282\,H,0,-0.1763285415,1.2782925396,-1.0895836004\,H,0,1.9401857105,0.6228191928,-0.4068594987\,H,0,4.0424738727,0.8847235573,-0.1884632855\,H,0,4.5525451301,-0.6024286513,-0.1897399652\,H,0,6.2010662226,0.6367914527,0.116889923\,H,0,8.120698433,4.0590513519,0.4092315785\,S,0,6.9276468643,6.2405816729,0.1135448784\,F,0,5.9816704419,6.4616596264,-1.1730743133\,F,0,8.2230827665,6.1560985224,-0.857542338\,F,0,5.6691147665,6.497235513,1.0877856058\,Cl,0,8.9778460252,1.2121915149,0.4825340593\,F,0,7.152623841,7.8449146658,0.1195530037\,F,0,7.9106945268,6.1915656365,1.4019279953\,O,0,2.1649952286,-1.1311017510,-0.2614213499\,O,0,4.3769913133,-0.7881653018,-0.089913208\,C,0,3.3513986549,-1.5231502017,-0.1334190673\,C,0,3.5600712161,-3.0413599158,-0.021865284\,C,0,5.0122477793,-3.4682974714,0.1528219366\,H,0,3.1220915705,-3.4910144266,-0.9216835495\,H,0,2.9419092592,-3.3893708082,0.814852555\,H,0,5.6200114674,-3.1243128035,-0.6889416607\,H,0,5.0988387029,-4.5594207457,0.2248371801\,H,0,5.4397570747,-3.0241824829,1.0564198582\|Version=ES64L-G09RevE.01|State=1-A|HF=-267.7284252|RMSD=4.146e-09|Dipole=1.039879,1.3007982,0.3152966|Quadrupole=-1.0392127,-20.9478892,21.9871019,-13.6962321,-2.2619466,-0.8964817|PG=C01 [X(C13H17ClF5N2O3S1)]\@

### 11\_propanoate.M062X\_6-31pGd\_opt\_water

1\1\GINC-R3717\FOpt\RM062X\Gen\C13H17ClF5N2O3S1(1-)\ROOT\26-Feb-2019\0\# M062X\Gen 6D SCF=Tight INT(grid=ultrafine) OPT=CalcFC IOP(2/17=4) SCRF=(SMD,Solvent=h2o) maxdisk=3221225472\3SF5Chloro\_EtO.M062X\_6-31pGd\_opt\_water\1,1\,C,-1.9278368656,2.0482007752,-0.0458299236\,C,-0.5075645326,1.4923500445,-0.0662143061\,C,0.5201638479,2.606553662,0.0690338125\,N,1.8671895047,2.0540413328,0.057421992\,C,2.9428769152,2.8574738024,0.1391772537\,O,2.8561745871,4.0938797178,0.2514742255\,N,4.1525369142,2.1860494863,0.1035434824\,C,5.4155093464,2.7602327219,0.1673077388\,C,5.679256327,4.0939775154,-0.1808135343\,C,6.478900585,1.9305799052,0.5589164598\,C,7.767592485,2.4362408947,0.6056641394\,C,8.0655823383,3.7571357763,0.2852173871\,C,6.9890044299,4.5431192815,-0.101910274\,H,-2.6656840173,1.2464994717,-0.1452070942\,H,-2.0839124607,2.7539212407,-0.8693587195\,H,-2.1280834386,2.5765195011,0.8929543151\,H,-0.3303619902,0.9488190788,-1.0025832075\,H,-0.3726545781,0.7741271733,0.7520398448\,H,0.3567598755,3.155823012,1.0041737542\,H,0.4048763406,3.3236664251,-0.7536350156\,H,1.9879783226,1.0484188492,-0.1258943603\,H,4.1159516929,1.1582717879,0.2119943111\,H,4.8780137622,4.7400144141,-0.5084299154\,H,6.284712073,0.8964452732,0.8271817355\,H,4.8003172183,4.1337696993,0.3377078131\,S,7.3170445274,6.2712724046,-0.544560256\,F,6.0433970227,6.8161195637,0.2854994613\,F,6.4096069495,6.1921337413,-1.8783298132\,F,8.2565365926,6.5094934748,0.7483834013\,Cl,9.0686280314,1.3823952332,1.0969601019\,F,7.6126576095,7.8110648272,-0.9379481371\,F,8.6225701466,5.8871123559,-1.4154410256\,O,2.0972091571,-0.7712290165,-0.5031966261\,O,4.1056986863,-0.6363452973,0.4678458234\,C,3.1394908073,-1.2974245443,-0.0101886385\,C,3.2072955727,-2.8212459341,-0.004334506\,C,4.4795155849,-3.409666268,0.5886128216\,H,3.0737332523,-3.1499484724,-1.0419979739\,H,2.3239191571,-3.1774146889,0.539270497\,H,4.6052473169,-3.1097104087,1.6335250653\,H,5.3640426904,-3.0794500268,0.0351881679\,H,4.4469730783,-4.5032074269,0.5526597222\|Version=ES64L-G09RevE.01|State=1-A|HF=-2197.9736801| RMSD=5.115e-09|RMSF=1.406e-06|Dipole=1.7587518,0.8708144,0.0625184|Quadrupole=3.8287609,-18.7698435,14.9410827,-14.1150107,-0.9558991,0.457451|PG=C01 [X(C13H17ClF5N2O3S1)]\@

### 11\_propanoate.M062X\_6-31pGd\_opt

1\1\GINC-R3713\FOpt\RM062X\Gen\C13H17ClF5N2O3S1(1-)\ROOT\26-Feb-2019\0\# M062X\Gen 6D SCF=Tight INT(grid=ultrafine) OPT=CalcFC IOP(2/17=4) maxdisk=3221225472\3SF5Chloro\_EtO.M062X\_6-31pGd\_opt\1,1\,C,-1.6761737953,3.0057081687,0.4889021821\,C,0,-0.2421517185,2.5179465304,0.6838177214\,C,0.3975428859,2.0977390265,-0.641201788\,N,1.7597502553,1.639750027,-0.4982758092\,C,2.7676576721,2.5357376075,-0.3825018747\,O,2.6047099744,3.7582540765,-0.4289795585\,N,4.0072648525,1.9295408245,-0.2150029589\,C,5.2218592942,2.5547757621,-0.0591671272\,C,5.4068287071,3.9526632811,-0.0592890766\,C,6.344467644,1.714855843,0.1105594448\,C,7.5990728357,2.2718411579,0.2731037807\,C,7.8202562795,3.6462578638,0.2794626753\,C,6.6933118863,4.4402177143,0.1101819807\,H,0,-2.1346318044,3.3014851187,1.4383981651\,H,0,-2.3022191544,2.221788609,0.0451018796\,H,0,-1.7047769933,3.873293755,-0.1807808727\,H,0,-0.2183213818,1.6642148751,1.3719756751\,H,0,0.3737044453,3.3105073907,1.1234524744\,H,0.3797143786,2.9459243794,-1.3365646282\,H,0,-0.1763285415,1.2782925396,-1.0895836004\,H,1.9401857105,0.6228191928,-0.4068594987\,H,4.0424738727,0.8847235573,-0.1884632855\,H,4.5525451301,-0.6024286513,-0.1897399652\,H,6.2010662226,0.6367914527,0.116889923\,H,8.120698433,4.0590513519,0.4092315785\,S,6.9276468643,6.2405816729,0.1135448784\,F,5.9816704419,6.4616596264,-1.1730743133\,F,8.2230827665,6.1560985224,-0.857542338\,F,5.6691147665,6.497235513,1.0877856058\,Cl,8.9778460252,1.2121915149,0.4825340593\,F,7.152623841,7.8449146658,0.1195530037\,F,7.9106945268,6.1915656365,1.4019279953\,O,2.1649952286,-1.1311017510,-0.2614213499\,O,4.3769913133,-0.7881653018,-0.0899131208\,C,3.3513986549,-1.5231502017,-0.1334190673\,C,3.5600712161,-3.0413599158,-0.021865284\,C,5.0122477793,-3.4682974714,0.1528219366\,H,3.1220915705,-3.4910144266,-0.9216835495\,H,2.9419092592,-3.3893708082,0.814852555\,H,5.6200114674,-3.1243128035,-0.6889416607\,H,5.0988387029,-4.5594207457,0.2248371801\,H,5.4397570747,-3.0241824829,1.0564198582\|Version=ES64L-G09RevE.01|State=1-A|HF=-2197.9082652|RMSD=8.001e-09|RMSF=3.999e-06|Dipole=1.0371109,1.3287006,0.3130705|Quadrupole=-0.9374839,-21.2069143,22.1443981,-13.7648135,-2.2631529,-0.8915638|PG=C01 [X(C13H17ClF5N2O3S1)]\@

### 11.M062X\_6-31pGd\_opt

1\1\GINC-R3751\FOpt\RM062X\Gen\C10H12ClF5N2O1S1\ROOT\31-Oct-2018\0\# M062X\Gen 6D SCF=Tight INT(grid=ultrafine) OPT IOP(2/17=4) maxdisk=2684354560\3SF55Chloro.M062X\_6-31pGd\_opt\0,1\,C,-1.8313614645,1.5664542783,0.1428751125\,C,-0.4028537498,1.0268055488,0.1286769734\,C,0.6143487

873,2.1473274355,-0.042876205\N,1.9706831447,1.6107368696,-0.045657926  
8\C,3.027619147,2.4831739217,0.0300145314\O,2.8914250719,3.6775959876,  
0.2228544977\N,4.2668560775,1.8598484081,-0.1029688818\C,5.5241371208,  
2.469933185,-0.0615582737\C,5.7055606952,3.8594474363,-0.0974141921\C,  
6.6423085702,1.6277691458,-0.0070858381\C,7.919325697,2.1681053241,0.0  
101822777\C,8.1346329797,3.5409016127,-0.0232017179\C,7.0046058648,4.3  
453330402,-0.0768418135\H,-2.5572109911,0.758217505,0.2667817414\H,-2.  
0648815813,2.0879160649,-0.7913844228\H,-1.9728520603,2.2746254262,0.9  
659860407\H,-0.293371117,0.3014179341,-0.689652227\H,-0.1896963532,0.4  
912770949,1.0613734188\H,0.5469220844,2.8590979363,0.7842412601\H,0.41  
8112631,2.7084079686,-0.9674188508\H,2.1066143735,0.7409941318,-0.5463  
3904\H,4.2755319665,0.8496892866,-0.052122342\H,4.8518674269,4.5211144  
854,-0.12990053\H,6.5203752268,0.5487038092,0.0214740744\H,9.136705718  
1,3.950934494,-0.0070436455\H,7.2408031133,6.1477680661,-0.1248846485\  
F,6.1664904541,6.3244667561,-1.3123427275\F,8.4242111064,6.0251248554,  
-1.2167205251\F,6.0819229495,6.3991032202,0.9630859962\C1,9.2867865143  
1,0.953068718,0.078779491\F,7.456737613,7.7380021819,-0.1694435944\F,8.  
3393129835,6.0980797175,1.056871987\Version=ES64L-G09RevE.01\State=1  
-A\HF=-1930.0962802\RMDSM=9.203e-09\RMSE=-1.5333625,-2  
.7430307,-0.3073349\Quadrupole=5.4712852,0.3739384,-5.8452236,8.104772  
8,2.1052901,1.5223336\PG=C01[X(C10H12C11F5N2O1S1)]\@

### 11.M062X\_6-31pGd\_opt\_water

I\1\GINC-R4423\FOpt\RM062X\Gen\C10H12C11F5N2O1S1\ROOT\30-Oct-2018\0\#  
M062X\Gen 6D SCF=Tight INT(grid=ultrafine) OPT IOP(2/17=4) SCRF=(SMD,  
Solvent=h2o) maxdisk=2684354560\3SF55Chloro.M062X\_6-31pGd\_opt\_water\  
0,1\C,-1.8209571608,1.5055211498,-0.0992953652\C,-0.3995589595,1.04436  
21793,0.2063773557\C,0.606014931,2.1496847962,-0.0771310243\N,1.961462  
4612,1.6884196919,0.2024038999\C,3.0185763471,2.5088997088,0.028973772  
9\O,2.8916091967,3.7087202509,-0.2537421753\N,4.2521337789,1.907346418  
0,2071879382\C,5.5050587443,2.4973184623,0.0498424836\C,5.7153209616,  
3.8822862059,0.0851691998\C,6.5997773549,1.6360907774,-0.1142414887\C,  
7.8749639778,2.1607759862,-0.2454109312\C,8.1236743225,3.5297626936,-0  
.2310856434\C,7.0144913939,4.3462112952,-0.0636217646\H,-2.5439992052,  
0.7113806652,0.108786736\H,-1.9229848253,1.7873223216,-1.1530509514\H,  
-2.0898674162,2.3753204489,0.5101639044\H,-0.1522667826,0.1655054662,-  
0.4020959357\H,-0.3194097412,0.7437909335,1.2579469961\H,0.3924781311,  
3.0225872754,0.5486916906\H,0.5318213906,2.4682432945,-1.1245702312\H,  
2.1135650714,0.6923821486,0.3235944207\H,4.2590372376,0.8970042592,0.3  
117395539\H,4.8857809958,4.5585884683\C,8.2312829502\H,6.4434189923,0.56  
15502583,-0.1394139578\H,9.1289516275,3.9188695642,-0.3432799326\S,7.2  
77563561,6.1406040159,-0.0252776541\F,6.0194245873,6.4312004182,-0.99  
38085171\F,8.2548704217,6.106204752,-1.310949719\F,6.3260634874,6.3371  
782545,1.2642476428\C1,9.2186475731,1.0681259335,-0.4463806734\F,7.514  
4914119,7.7388211916,0.0086959447\F,8.5613233373,6.0136007148,0.946594  
6275\Version=ES64L-G09RevE.01\State=1-A\HF=-1930.114621\RMDSM=4.435e-  
09\RMSE=5.702e-06\RMSE=-1.752688,-4.3353976,0.4212078\Quadrupole=4.2  
952473,3.555779,-7.8510263,12.8889754,-2.1346836,-1.286257\PG=C01[X(C  
10H12C11F5N2O1S1)]\@

### 11.M062X\_6-31pGd\_opt\_Pentadecane

I\1\GINC-R3837\FOpt\RM062X\Gen\C10H12C11F5N2O1S1\ROOT\25-Feb-2019\0\#  
M062X\Gen 6D SCF=Tight INT(grid=ultrafine) OPT IOP(2/17=4) SCRF=(SMD,  
Solvent=n-Pentadecane) maxdisk=2684354560\3SF55Chloro.M062X\_6-31pGd\_op  
t\_Pentadecane\0,1\C,-1.8271176415,1.4827347266,0.2250737577\C,-0.3855  
654414,0.9928465089,0.1226568927\C,0.5927707093,2.1562685433,0.0267810  
342\N,1.9613089639,1.6635620592,-0.0660621052\C,3.0103398772,2.5202882  
677,0.0998044136\O,2.874409734,3.6873764646,0.4350774417\N,4.249958207  
7,1.9273764957,-0.1223073878\C,5.5057834532,2.5255137023,-0.0239797166  
\C,5.6940735211,3.9023740712,0.1647861543\C,6.233429317,1.686521851,-  
0.1410097268\C,7.900900131,2.2186869987,-0.069940055\C,8.1251840699,3  
.57802615,0.1179097783\C,6.995849822,4.3771912349,0.2289079849\H,-2.5  
245638047,0.6426921321,0.293191744\H,-2.1052268722,2.079322073,-0.6506  
549494\H,-1.9666826568,2.107325922,1.1141032004\H,-0.2774345584,0.3497  
318236,-0.7616606173\H,-0.1299829002,0.3829414357,0.9975468359\H,0.526  
8991885,2.7864209257,0.9179784807\H,0.3515468687,2.7892126552,-0.83855  
0604\H,2.1075751207,0.8061894923,-0.5856293703\H,4.25901353,0.92418030  
88,-0.2606515243\H,4.8419990261,4.5597010312,0.2619194193\H,6.49251323  
2,0.6179686411,-0.2870060591\H,9.1305473538,3.9775456475,0.1730789822\  
S,7.2352306623,6.1626945073,0.4724836256\F,6.1341404996,6.5379703197,-  
0.6434855021\F,8.3933297862,6.2311132792,-0.6517187468\F,6.1030478166,  
6.2366124055,1.6157213461\C1,9.2680044438,1.1492306624,-0.217861096\F,  
7.4536680111,7.7431318058,0.6863104171\F,8.3619071544,5.928047858,1.60

55968024\Version=ES64L-G09RevE.01\State=1-A\HF=-1930.1117592\RMDSM=5.5  
38e-09\RMSE=8.118e-06\RMSE=-1.7052442,-3.1634647,-0.7428637\Quadrupo  
le=5.2924756,0.5750414,-5.8675179,1.590116,3.0288367,2.3655916\PG=C01  
[X(C10H12C11F5N2O1S1)]\@

### 10\_propanoate.M062X\_6-31pGd\_opt

I\1\GINC-R3748\FOpt\RM062X\Gen\C15H17F6N2O3(1-)\ROOT\19-Feb-2019\0\#  
M062X\Gen 6D SCF=Tight INT(grid=ultrafine) OPT IOP(2/17=4) maxdisk=322  
1225472\34TFM\_EtO.M062X\_6-31pGd\_opt\1,1\C,-2.115626308,2.2467108197  
-0.1609901682\C,-0.7436330215,1.5776695724,-0.1295830364\C,0.38230404  
52,2.6052292183,-0.1027365064\N,1.6601082849,1.9306952932,-0.065887376  
6\C,2.806637287,2.6446484885,-0.103668245\O,2.8408385502,3.8746441065,  
-0.1825970944\N,3.9415455951,1.839063313,-0.0460292419\C,5.2527542123,  
2.2428020351,-0.0662482607\C,5.679745228,3.5844988077,-0.1608160077\C  
.6238751253,1.2344830476,0.0100724768\C,7.5781588724,1.5599288149,-0  
0.14495194\C,8.0119139475,2.885867081,-0.0880511722\C,7.0345116116,3.  
8926318579,-0.1755739257\H,-2.9206919767,1.5049481771,-0.1826638823\H,  
-2.2231044295,2.8845986926,-1.046376838\H,-2.2660706751,2.878890741,0.  
7221787954\H,-0.6138615214,0.928227405,-1.0034375384\H,-0.6551139245,0  
9235998987,0.7458311711\H,0.2743157221,3.2646094495,0.7715013695\H,0.  
3297691154,3.2544043553,-0.987985396\H,1.674140393,0.8970255393,0.02229  
98882\H,3.7990823886,0.8072042907,0.0236031047\H,4.9351358259,4.365493  
9954,-0.226505096\H,5.910060611,0.1988433226,0.0806685707\H,8.31404658  
1,0.7656692001,0.0632688937\C,7.3960419363,5.3573770745,-0.2504751016\  
C,9.4900790457,3.1434151854,-0.1228156627\F,9.8675380083,4.19143097,0.  
632191797\F,9.9605627264,3.3796637994,-1.3676385357\F,10.1892516474,2  
.0804605854,0.3334581496\F,6.3715812499,6.1133585499,-0.679352456\F,8.  
420088565,5.5934900997,-1.0930992724\F,7.7559725182,5.8576043348,0.949  
4268139\O,1.5731967979,-0.8670617728,0.1731589743\O,3.8179566527,-0.91  
39494671,0.1484023631\C,2.6815513917,-1.4588018057,0.2061050507\C,2.63  
14824686,-2.990153343,0.3277187498\C,3.9966339135,-3.6653472632,0.3723  
14899\H,2.0369048056,-3.359155989,-0.5166284924\H,2.0468318187,-3.2214  
422842,1.2266727333\H,4.5697144439,-3.4374301211,-0.5310593247\H,3.898  
1860378,-4.7543864825,0.4590838941\H,4.5809551377,-3.2990794569,1.2214  
130733\Version=ES64L-G09RevE.01\State=1-A\HF=-1515.728782\RMDSM=4.754e  
-09\RMSE=4.216e-06\RMSE=-1.8450125,0.3313186,-0.040794\Quadrupole=-15  
1982587,-7.7842424,22.9825011,-18.5954096,1.3835206,2.0135448\PG=C01  
[X(C15H17F6N2O3)]\@

### 10\_propanoate.M062X\_6-31pGd\_opt\_Pentadecane

I\1\GINC-R3752\FOpt\RM062X\Gen\C15H17F6N2O3(1-)\ROOT\19-Feb-2019\0\#  
M062X\Gen 6D SCF=Tight INT(grid=ultrafine) OPT IOP(2/17=4) SCRF=(SMD,S  
olvent=n-Pentadecane) maxdisk=3221225472\34TFM\_EtO.M062X\_6-31pGd\_opt\_  
Pentadecane\1,1\C,-2.1222600899,2.2779405546,-0.1186410834\C,-0.7581  
574984,1.5948656651,-0.0903071803\C,0.3778716268,2.6092795842,-0.13910  
91653\N,1.6550927951,1.9267628281,-0.1101595282\C,2.8045186785,2.63461  
91196,-0.1391172876\O,2.8406521288,3.867066422,-0.1970451368\N,3.93917  
72565,1.8308256174,-0.0975532538\C,5.252444446,2.2372973679,-0.1032681  
844\C,5.6775768079,3.5805804638,-0.1655261995\C,6.2348302204,1.2302074  
865,-0.044765047\C,7.5793673637,1.5557434718,-0.039675948\C,8.00956632  
96,2.8840980376,-0.0916666407\C,7.0318448342,3.8910368793,-0.163959904  
2\H,-2.9339046845,1.5439160064,-0.0835029106\H,-2.2483191809,2.8722924  
751,-1.0313705709\H,-2.2446364148,2.9527213692,0.7368746373\H,-0.66018  
46446,0.9053722639,-0.9374027685\H,-0.6564869043,0.9857707562,0.815806  
6228\H,0.3038179496,3.3018321853,0.7109493076\H,0.300623837,3.22097938  
34,-1.0487169059\H,1.6660647405,0.8920133973,-0.0549518935\H,3.7987718  
158,0.7982173898,-0.0404922023\H,4.93462126,4.3636840651,-0.2178474197  
\H,5.9167299009,0.1918388136,0.0007763743\H,8.3142566862,0.7594221322,  
0.0107526148\C,7.3904171298,5.3577696243,-0.204758801\C,9.4871260442,3  
.1483588814,-0.1024331951\F,9.8482328005,4.1794137898,0.6851807493\F,9  
9708037203,3.4215345027,-1.3346017973\F,10.1859703103,2.0794335762,0.  
3340222744\F,6.3691800394,6.1196636707,-0.6302872664\F,8.4234139219,5.  
6137276657,-1.0301967921\F,7.7351486835,5.8355891767,1.0085877813\O,1.  
5828934347,-0.8941229238,0.0639718051\O,3.8248545887,-0.9240262527,0.0  
890713893\C,2.6930798398,-1.4798047235,0.1457531708\C,2.6497938102,-3.  
002072653,0.3353254395\C,4.0125227014,-3.6762900506,0.4164436936\H,2.  
0581095635,-3.4133802676,-0.4917470254\H,2.0648534767,-3.1934952201,1.  
2435898147\H,4.5884909859,-3.5068569405,-0.4983231472\H,3.907210532,-4  
.7581974707,0.5611894595\H,4.598599157,-3.2732935082,1.2478620845\Ver  
sion=ES64L-G09RevE.01\State=1-A\HF=-1515.7662467\RMDSM=5.598e-09\RMSE=3  
957e-06\RMSE=-0.8573368,0.2429803,0.0339491\Quadrupole=-13.426217,-

7.972569,21.4018786,-19.1693258,0.6153463,1.2848488\PG=C01 [X(C15H17F6N2O3)]\@

### 10\_propanoate.M062X\_6-31pGd\_opt\_water

1\1\GINC-R3732\FOpt\RM062X\Gen\C15H17F6N2O3(1-)\ROOT\19-Feb-2019\0\# M062X\Gen 6D SCF=Tight INT(grid=ultrafine) OPT IOP(2/17=4) SCRF=(SMD,Solvent=h2o) maxdisk=3221225472\34TFM\_EiO.M062X\_6-31pGd\_opt\_water\1,1\,C,-2.0631831615,2.2129757523,-0.2372989322,C,-0.699120058,1.5485477709,-0.081439893\C,0.427384851,-2.5441282561,-0.3178576492\N,1.7187915784,1.8867323518,-0.176327777\C,2.8633972521,2.5815875117,-0.3117374186\O,2.8878893041,3.7924920114,-0.5965486342\N,4.0056811611,1.8231168508,-0.1255917094\C,5.3207064376,2.2605198773,-0.1302485281\C,5.7058877234,3.6115795139,-0.093721777\C,6.3233414463,1.2790614327,-0.1399810789\C,7.6616431476,1.6340954401,-0.1082805688\C,8.0521595638,2.9732691671,-0.0692976295\C,7.0516323682,3.9580266632,-0.0718594644\H,-2.8718905081,1.4964508541,-0.0652696987\H,-2.1856134024,2.624332508,-1.2454227047\H,-2.182626673,0.341735913,0.4782176256\H,-0.6019986268,0.716990086,-0.7903983353\H,-0.601303783,1.1245223086,0.9256167131\H,0.3498004981,3.3731887803,0.3971927909\H,0.3441261063,2.973607534,-1.3234218842\H,1.7439582482,0.9225891892,0.1824122094\H,3.8751866553,0.7991897421,-0.0624430105\H,4.9522046904,4.3845706088,-0.0780731909\H,6.0433669357,0.229720635,-0.1686225294\H,8.4139306315,0.8529348231,-0.114259046\C,7.3683294219,5.4337389651,-0.0079722655\C,9.5239398142,3.278886178,-0.0541357193\F,9.8464475768,4.2670647964,0.8028757081\F,9.9961784573,3.6518774002,-1.2633705748\F,10.2502115254,2.207786551,0.3129284415\F,6.3267630388,6.1922806255,-0.3870996717\F,8.3967968118,5.7756595985,-0.8053704597\F,7.6911829975,5.8329052324,1.2387178167\O,1.6968504498,-0.8018678249,0.8823314713\O,3.7122737671,-1.0108334496,-0.0599154123\C,2.6709250723,-1.4983268502,0.4665192693\C,2.5522785097,-3.0112638263,0.6241896682\C,3.7284041584,-3.8163794448,0.0901793304\H,1.6204317171,-3.3102146735,0.1295119301\H,2.4009541942,-3.2077241285,1.6925719447\H,3.8717928209,-3.6453021583,-0.981240671\H,3.5573942757,-4.8868747156,0.2414746107\H,4.6580730049,-3.5474790964,0.6011972441\Version=ES64L-G09RevE.01\State=1-A\HF=-1515.7958967\RMSE=9.974e-09\RMSE=2.153e-06\Dipole=1.3219898,0.006714,-0.069757\Quadrupole=-8.8721171,-6.8185429,15.69066,-19.6744475,3.3789945,4.1855952\PG=C01 [X(C15H17F6N2O3)]\@

### 10\_propanoate.M062X\_6-31pGd\_bsse

1\1\GINC-R4186\SP\RM062X\Gen\C15H17F6N2O3(1-)\ROOT\21-Feb-2019\0\# M062X\Gen 6D SCF=Tight INT(grid=ultrafine) Counterpoise=2 maxdisk=671088640\34TFM\_EiO.M062X\_6-31pGd\_bsse\1,1\,C,-2.115626308,2.2467108197,-0.1609901682\C,0,-0.7436330215,1.5776695724,-0.1295830364\C,0,0.3823040452,2.6052292183,-0.1027365064\N,0,1.6601082849,1.9306952932,-0.0658873766\C,0,2.806637287,2.6446484885,-0.103668245\O,0,2.8408385502,3.8746441065,-0.1825970944\N,0,3.9415455951,1.839063313,-0.0460292419\C,5.2527542123,2.2428020351,-0.0662482607\C,5.6797642528,3.5844988077,-0.1608160077\C,0,6.2338751253,1.2344830476,0.0100724768\C,0,7.5781588724,1.5599288149,-0.0014495194\C,0,8.0119139475,2.885867081,-0.0880511722\C,0,7.0345116116,3.8926318579,-0.1755739257\H,0,-2.9206919767,1.5049481871,-0.1826638823\H,0,-2.2231044295,2.8845986926,-1.046376838\H,0,-2.2660706751,-2.878890741,0.7221787954\H,0,-0.6138615214,0.928227405,-1.003475384\H,0,-0.6551139245,0.9235998987,0.7458311711\H,0,0.2743157221,3.2646094495,0.7715013695\H,0,0.3297691154,3.2544043553,-0.987985396\H,0,1.674140393,0.897025393,0.0222998882\H,0,3.7990823886,0.8072042907,0.0236031047\H,0,4.9351358259,4.3654939954,-0.226505096\H,0,5.91060611,0.1988433226,0.0806685707\H,0,8.314046581,0.7656692001,0.0632688937\C,0,7.3960419363,5.3573770745,-0.2504751016\C,0,9.4900790457,3.1434151854,-0.1228156627\F,0,9.8675380083,4.19143097,0.6332191797\F,0,9.9605627264,3.3796637994,-1.3676385357\F,0,10.1892516474,2.0804605854,0.3334581496\F,0,6.3715812499,6.1133585499,-0.679352456\F,0,8.4200885655.5934900997,-1.0930992724\F,0,7.7559725182,5.8576043348,0.9494268139\O,1,1.5731967979,-0.8670617728,0.1731589743\O,0,3.81179566527,-0.9139494671,0.1484023631\C,0,2.6815513917,-1.4588018057,0.2061050507\C,0,2.6314824686,-2.990153343,0.3277187498\C,0,3.9966339135,-3.6653472632,0.372314899\H,0,2.0360948056,-3.3591595989,-0.5166284924\H,0,2.0468318187,-3.2214422842,1.2266727333\H,0,4.5697144439,-3.4374301211,-0.5310593247\H,0,3.8981860378,-4.7543864825,0.4590838941\H,0,4.5809551377,-3.2990794569,1.2214130733\Version=ES64L-G09RevE.01\State=1-A\HF=-267.7284652\RMSE=4.029e-09\Dipole=0.8442586,0.3021579,-0.0384135\Quadrupole=-15.2661765,-7.5841433,22.8503198,-18.4516722,1.3745749,1.9879571\PG=C01 [X(C15H17F6N2O3)]\@

### 10.M062X\_6-31pGd\_opt

1\1\GINC-R3925\FOpt\RM062X\Gen\C12H12F6N2O1\ROOT\30-Oct-2018\0\# M062X\Gen 6D SCF=Tight INT(grid=ultrafine) OPT IOP(2/17=4) maxdisk=2684354560\34TFM.M062X\_6-31pGd\_opt\1,1\,C,-1.9142136395,1.8711942098,-0.0275844978\C,-0.5417488004,1.216713799,0.1131114462\C,0.5809773684,2.2154597893,-0.1356781701\N,1.8804491043,1.5683066565,0.0039888146\C,3.0097828851,2.3477908737,0.041503696\O,2.9775159911,3.5638645288,0.087170474\N,4.1893512042,1.6052101934,0.0563023624\C,5.4969805011,2.0935978519,0.0825155847\C,5.8212567678,3.4442076695,-0.1110518889\C,6.5300867167,1.1733125295,0.2863752566\C,7.8522954474,1.5892683813,0.3019080976\C,8.1867817461,2.9288560103,0.1161105135\C,7.1510078933,3.850738753,-0.0983903419\H,-2.7155744354,1.1498014753,0.1538387042\H,-2.0534246679,2.282487243,-1.0329565964\H,-2.0313685835,2.6910431882,0.6887605946\H,-0.4584587075,0.3841326756,-0.5994702719\H,-0.4243333885,0.7912777056,1.1667790788\H,0.5419403555,3.0293300585,0.59322875\H,0.4795579367,2.6696572443,-1.131483024\H,1.9588769189,0.6355686214,-0.382533685\H,4.0983732928,0.611740735,0.2206890705\H,5.0338426688,4.1675364793,-0.2666320837\H,6.2991949496,0.1215039288,0.4363196711\H,8.6382140384,0.861347858,0.4683179924\C,7.4095718742,5.3323001891,-0.2904360365\C,9.6515240789,3.2964436152,0.1252015534\F,9.8967178293,4.4236407267,0.8063022357\F,10.1438679761,3.4582195932,-1.1148004293\F,10.3872557431,2.3260308127,0.7015603525\F,6.3498709059,5.9499580785,-0.835089734\F,8.4525225566,5.5612473923,-1.1011368576\F,7.6588154723,5.9476777947,0.8764893682\Version=ES64L-G09RevE.01\State=1-A\HF=-1247.9178435\RMSE=7.521e-09\RMSE=4.946e-06\Dipole=-2.2138725,-2.8311815,-0.0711439\Quadrupole=1.0946658,8.3.8342639,-4.9289297,5.3666069,2.0775385,0.1281928\PG=C01 [X(C12H12F6N2O1)]\@

### 10.M062X\_6-31pGd\_opt\_water

1\1\GINC-R3724\FOpt\RM062X\Gen\C12H12F6N2O1\ROOT\30-Oct-2018\0\# M062X\Gen 6D SCF=Tight INT(grid=ultrafine) OPT IOP(2/17=4) SCRF=(SMD,Solvent=h2o) maxdisk=2684354560\34TFM.M062X\_6-31pGd\_opt\_water\1,1\,C,-1.91674437,1.8389407388,-0.028454318\C,-0.5315246213,1.2079429317,0.0708834571\C,0.559553151,2.2636376158,-0.0204958431\N,1.8743572729,1.6394337213,0.064468453\C,3.0006999857,2.3785808433,0.0230195177\O,2.9806994912,3.6156699054,-0.0539617999\N,4.1739849385,1.6461560428,0.0797270231\C,5.4824181469,2.1197701026,0.0836385362\C,5.8337568497,3.4533587525,-0.1770356434\C,6.5006470703,1.1925949115,0.3415585774\C,7.8282736645,1.5876625998,0.3532928955\C,8.1867643983,2.9135530543,0.1102352973\C,7.1693048376,3.8393506887,-0.1657997277\H,-2.6993126372,1.0779429332,0.048047274\H,-2.0397641319,2.3643610142,-0.9818238528\H,-2.0761748699,2.5621607122,0.7788014659\H,-0.3943868466,0.4761575421,-0.7347908\H,-0.4319176263,0.6675770258,1.0201041847\H,0.4518192078,2.9895637076,0.793282054\H,0.4755306871,2.8128360689,-0.9660361181\H,1.9296848836,0.6270407672,0.0925526458\H,4.0796450368,0.6427678163,0.2084205123\H,5.0657666153,4.1807338227,-0.3928782925\H,6.2459259521,0.1551104155,0.5383997047\H,8.5954978787,0.8499616229,0.5610050992\C,7.4529799749,5.2992153949,-0.4346264798\C,9.6501402263,3.2617742499,0.1246090455\F,9.9048299676,4.4322557116,0.7393887998\F,10.1760764169,3.3555498026,-1.1149960047\F,10.3756065196,2.3297324503,0.7674839835\F,6.4164731532,5.9135696542,-1.027179149\F,8.5141141855,5.4770892135,-1.2418237021\F,7.7025076646,5.9868418657,0.6974095993\Version=ES64L-G09RevE.01\State=1-A\HF=-1247.937026\RMSE=4.094e-09\RMSE=5.886e-06\Dipole=-2.7981014,-4.4726145,0.4009785\Quadrupole=-0.3475347,6.8620942,-6.5145595,9.765534,0.2654655,-1.7842593\PG=C01 [X(C12H12F6N2O1)]\@

### 10.M062X\_6-31pGd\_opt\_Pentadecane

1\1\GINC-R3916\FOpt\RM062X\Gen\C12H12F6N2O1\ROOT\22-Feb-2019\0\# M062X\Gen 6D SCF=Tight INT(grid=ultrafine) OPT IOP(2/17=4) SCRF=(SMD,Solvent=n-Pentadecane) maxdisk=2684354560\34TFM.M062X\_6-31pGd\_opt\_Pentadecane\1,1\,C,-2.0644881492,2.3504320902,-0.3736343798\C,-0.702718932,1.6651726143,-0.3078551894\C,0.4208514033,2.6753945098,-0.1159946016\N,1.7087034757,1.9966069873,-0.0499845609\C,2.8669417045,2.7114786492,-0.1509803183\O,2.8942815382,3.9050277239,-0.4104001957\N,4.0124812513,1.9430103132,0.0412014719\C,5.3382723789,2.3689408171,0.107818155\C,5.7198095318,3.7166374432,-0.0805022374\C,6.3360931197,1.3909215036,0.0974454906\C,7.6756541253,1.7451343776,0.0854111419\C,8.0659777333,3.0794510267,-0.0129770581\C,7.0664495257,4.0618392755,-0.0863217508\H,-2.8666808282,1.6198331316,-0.5131392503\H,-2.1073662051,3.058874217,-1.208060384\H,-2.2727943312,2.9050899814,0.5478575446\H,-0.5190235151,1.0978504887,-1.2282270148\H,-0.6936297053,0.9450956608,0.521999145\H,0.25094551,3.2687377721,0.7933059586\H,0.4563949479,3.3734750935,-0.9568141236\H,1.7282962182,1.0943409301,0.4101791911\H,3.8841703543,0.941052654



5,0.1203404551\H,4.9619384949,4.4837389565,-0.1467269093\H,6.061736401  
8,0.3418273526,0.1719674031\H,8.4302293749,0.9689103575,0.1480831018\C  
.73881163841,5.5365257063,-0.2100043133\C,9.5424918314,3.3849470597,-  
0.0001150943\F,9.8872014965,4.3254094728,-0.8931617671\F,10.2685633957  
.2.2896165022,-0.2953945365\F,9.9717170981,3.8057971182,1.2045878185\F  
.63326976723,6.3037969474,0.1043827342\F,7.7444454761,5.8699058848,-1  
.4629540695\F,8.3903912221,5.9074073809,0.602594483\Version=ES64L-G09  
Rev.E.01\State=1-A\HF=-1247.9328083\RMMSD=8.143e-09\RMFSF=2.368e-06\Dipol  
e=-2.6360796,-3.1758481,0.5356929\Quadrupole=1.2908284,4.0961858,-5.38  
70142,6.1196178,-2.6549127,-1.6915967\PG=C01 [X(C12H12F6N2O1)]\@

#### 6.M062X.opt

1\1\GINC-R4416\FOpt\RM062X\Gen\C11H12C11F3N2O1\ROOT\12-Jul-2018\0\# M  
062X\Gen 6D SCF=Tight INT(grid=ultrafine) OPT IOP(2/17=4) Freq=Noraman  
maxdisk=2147483648\aryl\_urea\_CI\_CF3.M062X.opt\0,1\C,-4.2219699984,3  
.0921246846,-0.7877862884\C,-4.0860658285,1.7210908982,-0.594821155\C,  
-2.9206125605,1.1692311931,-0.0883323545\C,-1.8376399534,1.9975987313,  
0.2435210443\C,-1.9485226508,3.380033916,0.0595955416\C,-3.1375662396,  
3.893914998,-0.4526744958\H,-5.1379710026,3.111662118,-1.1866389109\N  
,-0.6844809784,1.3686914757,0.7256437899\C,0.4525478734,1.9801669072,1  
.2448969887\N,1.422272427,1.0856900858,1.6291910956\O,0.5725351375,3.1  
850372104,1.3755688755\C,2.7152587543,1.5963802709,2.0691798224\C,3.54  
47831769,0.4820712492,2.6937989154\C,4.9045272736,0.9933818727,3.16447  
3032\H,-2.8538695307,0.0929563222,0.0451160945\H,-1.1262277945,4.03440  
2607,0.3163437809\H,-0.7540370686,0.3660221024,0.8384310167\H,1.430764  
4765,0.1757216212,1.1847624924\H,2.5224912071,2.3882236922,2.797877339  
2\H,3.2569741948,2.0559763393,1.2302380227\H,3.6903518926,-0.323801297  
7,1.960787145\H,2.9881053282,0.0520780117,3.5348303083\H,5.4797650977,  
1.408345654,2.3300298723\H,5.4956035542,0.1894626435,3.6122965998\H,4.  
7867336757,1.7821757665,3.91481177\Cl,-5.4108235508,0.6667124053,-1.00  
11954293\C,-3.236338903,5.3887637593,-0.6121811063\F,-3.2919853725,6.  
0093421806,0.5799395755\F,-4.3306088736,5.7558521014,-1.2989301101\F,-  
2.1715687763,5.8909663863,1.2597732725\Version=ES64L-G09Rev.E.01\Stat  
e=1-A\HF=-1370.5372523\RMMSD=3.304e-09\RMFSF=3.794e-06\Dipole=1.2919467,  
-2.3044984,0.3422649\Quadrupole=4.2697816,-0.6453867,-3.6243949,-6.920  
8459,2.1221183,-1.89227\PG=C01 [X(C11H12C11F3N2O1)]\@

#### 6\_propanoate.M062X\_6-31pGd\_opt\_Pentadecane

1\1\GINC-R4179\FOpt\RM062X\Gen\C14H17C11F3N2O3(1-)\ROOT\19-Feb-2019\0  
\# M062X\Gen 6D SCF=Tight INT(grid=ultrafine) OPT IOP(2/17=4) SCRF=(SM  
D,Solvent=n-Pentadecane) maxdisk=2684354560\6\_C2\_EtO.M062X\_6-31pGd\_  
opt\_Pentadecane\1,1\C,-4.1088128341,3.7521201998,-0.8065102751\C,-2.  
9371813792,4.4713152852,-0.6099526629\C,-1.7499869511,3.8971433399,-0.  
1785204038\C,-1.716819042,2.51290352,0.0819374588\C,-2.8932703911,1.75  
98955667,-0.1078930009\C,-4.0526070838,2.3834147156,-0.5443431913\H,-5  
0.170533679,4.2344181933,-1.1464563253\N,-0.6038678283,1.8266358714,0.  
5209924956\C,0.6639548164,2.3410613079,0.7529494993\N,1.5380124938,1.4  
138244049,1.2053389746\O,0.9708403538,0.564945662\C,2.906  
7613106,1.7830537133,1.5008955908\C,3.6775630796,0.5741110335,2.017843  
756\C,5.1290199891,0.9268206247,2.3300485901\H,-0.8586437467,4.4931023  
739,-0.0403411735\H,-2.8723117978,0.6906269826,0.0935442668\H,-0.75413  
11917,0.8065881447,0.6883900413\H,1.234961953,0.4392754573,1.378053781  
8\H,2.9254224136,2.5894947575,2.2474732118\H,3.3908374731,2.181124578,  
0.5979913367\H,3.6341733933,-0.2272683152,1.2705997853\H,3.1794079914,  
1.862684602,2.914416914\H,5.6477377229,1.2929354538,0.564945662\C,2.906  
7613106,1.7830537133,1.5008955908\C,3.6775630796,0.5741110335,2.017843  
756\C,5.1290199891,0.9268206247,2.3300485901\H,-0.8586437467,4.4931023  
739,-0.0403411735\H,-2.8723117978,0.6906269826,0.0935442668\H,-0.75413  
11917,0.8065881447,0.6883900413\H,1.234961953,0.4392754573,1.378053781  
8\H,2.9254224136,2.5894947575,2.2474732118\H,3.3908374731,2.181124578,  
0.5979913367\H,3.6341733933,-0.2272683152,1.2705997853\H,3.1794079914,  
1.8626846

2.9656599921\H,5.5983331032,1.3627456087,1.5973941757\H,5.61241788,0.0  
854627497,2.8236037975\H,5.0794003273,1.7183552319,3.2536909524\C1,-2.  
7909331089,6.0895961954,-1.5252217582\C,-5.3705067044,1.6801710114,-0.  
4934810025\F,-5.2801475688,0.5863632708,-1.2787242383\F,-6.4229816036,  
2.3874127546,-0.9343097627\F,-5.6908947923,1.2292728774,0.7368750458\O  
-1.2617631531,-0.8567623256,1.1580633551\O,0.8689192426,-1.3657432625  
.1.6035746322\C,-0.3467103015,-1.6786165079,1.4737196618\C,-0.77378262  
-3.1257495969,1.7006797921\C,0.3359175977,-4.0631537898,2.1551141036\O  
H,-1.216867295,-3.4764872605,0.7604239877\H,-1.5923436119,-3.108288145  
.2.429839575\H,1.1404574615,-4.1135950955,1.4151001928\H,-0.0547630547  
-5.0754661886,2.2991327028\H,0.7710482524,-3.7307442598,3.1027791282\O  
\Version=ES64L-G09RevE.01\State=1-A\HF=-1638.4148471\RMSD=5.603e-09\RM  
SF=5.619e-06\Dipole=-0.9285989,0.5081038,-0.4418741\Quadrupole=-2.4113  
856,-8.7086377,1.1200233,0.3135338,-3.2313644,5.1734912\PG=C01 [X(C14  
H17C11F3N2O3)]\@

### 6.M062X.SMD.h2o.opt

1\1\GINC-R4493\FOpt\RM062X\Gen\C11H12C11F3N2O1\ROOT\12-Jul-2018\0\# M  
062X\Gen 6D SCF=Tight INT(grid=ultrafine) OPT IOP(2/17=4) Freq=Noraman  
SCRF=(SMD,Solvent=h2o) maxdisk=2147483648\vary1\_urea\_CI\_CF3.M062X.SMD  
.h2o.opt\0,1\C,-4.2320811711,3.0839767232,-0.7844623646\C,-4.07831401  
28,1.1714108925,-0.5669855614\C,-2.908898396,1.174906289,-0.0640005041  
\C,-1.8236724454,2.0149367873,0.2411808117\C,-1.9463457573,3.392129601  
8,0.027279577\C,-3.1459110193,3.8924734279,-0.4768194566\H,-5.15727554  
81,3.4901184544,-1.1765097098\N,-0.6710785918,1.394347711,0.7254464162  
C,0.452369458,1.9951716602,1.2603693081\H,1.413768324,1.1383877891,1.  
6628358232\O,0.5706696418,3.2243843827,1.3741832224\C,2.6816203312,1.6  
286887429,2.19065385\C,3.5699342316,0.4643256051,2.6010242534\C,4.9070  
343393,0.9593185171,3.1428098439\H,-2.8258113422,0.1036013792,0.095503  
0662\H,-1.1254105081,4.0614644742,0.2442169958\H,-0.702152769,0.379348  
4436,0.748913823\H,1.3167037726,0.1445368523,1.4857012287\H,2.48410639  
11,2.2741567615,3.053484901\H,3.1862948242,2.2386733194,1.4312063663\H  
3.7350476291,-0.1875714495,1.7341991586\H,3.0536691776,-0.1329220353,  
3.362299882\H,5.4455425173,1.5396905788,2.3855819243\H,5.5437201394,0.  
1212186764,3.4410628537\H,4.7610286382,1.6008019777,4.0188634651\C1,-  
5.4098333129,0.6505022566,-0.9381760578\C,-3.2323487267,5.3774890399,-  
0.6875112472\F,-3.061579394,6.0597168368,0.463859427\F,-4.4116237021,5  
.7659137405,-1.1973381966\F,-2.2772980187,5.8225825634,-1.5298722058\O  
\Version=ES64L-G09RevE.01\State=1-A\HF=-1370.5562207\RMSD=3.023e-09\RM  
SF=2.834e-06\Dipole=-1.43011,-3.6477610,-0.5085546\Quadrupole=3.3949249,1  
.1399976,-4.5349225,-10.9746854,2.7850249,-4.2831915\PG=C01 [X(C11H12C  
11F3N2O1)]\@

### 6\_propanoate.M062X\_6-31pGd\_bsse

1\1\GINC-R3845\SP\RM062X\Gen\C14H17C11F3N2O3(1-)\ROOT\21-Feb-2019\0\#  
M062X\Gen 6D SCF=Tight INT(grid=ultrafine) Counterpoise=2 maxdisk=671  
088640\C2\_EtO.M062X\_6-31pGd\_bsse\1,1\C,0,-4.0705611683,3.707506  
8963,-0.9362405015\C,0,-2.874743224,4.4011244627,-0.8517935115\C,0,-1.  
6991683193,3.8425963406,-0.3628459648\C,0,-1.7124383455,2.5039878164,0.  
0694457618\C,0,-2.9205458749,1.7713489247,-0.0071420257\C,0,-4.061241  
3986,2.3780798524,-0.5006207207\H,0,-4.9703568883,4.1741258591,-1.3215  
777002\N,0,-0.620146224,1.8341929139,0.5724037606\C,0,0.6655779731,2.3  
318720221,0.7418181782\N,0,1.5148009843,1.4139667503,1.2625785077\O,0,  
1.000098775,3.4855720857,0.4599460768\C,0,2.9149047475,1.7272625702,1.  
43302161\C,0,3.5764099369,0.6840563425,3.3278485202\C,0,5.0705786774,0.  
9505256042,2.4950019659\H,0,-0.7841650184,4.416403236,-0.3106292918\H  
0,-2.926223232,0.7363915155,0.3263061042\H,0,-0.7937623794,0.8388270  
573,0.8407122543\H,0,1.2184829694,0.4282906953,1.3813907953\H,0,3.0053  
933734,2.7280834549,1.8722740734\H,0,3.4301235922,1.7651829609,0.45917  
92028\H,0,3.4087415914,-0.3133643689,1.904096117\H,0,3.0760441402,0.68  
87567732,3.3034993887\H,0,5.5859334234,0.9209152964,1.5276912099\H,0,5  
.539036979,0.205802195,3.14596099\H,0,5.2481116869,1.9395644519,2.93  
42606498\C1,0,-2.8404375396,6.0720488856,-1.3904519917\C,0,-5.35000301  
59,1.6155233157,-0.5935949145\F,0,-5.7888858805,1.5202370425,-1.870379  
4948\F,0,-6.3472685634,2.2269292497,0.0871508769\F,0,-5.2656748087,0.3  
661173789,-0.1189252227\O,0,-1.2892453754,-0.7623658346,1.1782054715\O  
0,0.8449003571,-1.3047876415,1.6183734615\C,0,-0.373830276,-1.5760887  
657,1.486565896\C,0,-0.8210639742,-3.0278515702,1.717703702\C,0,0.310  
4139812,-3.9830198294,2.0766609742\H,0,-1.3403380673,-3.3533165264,0.8  
080028631\H,0,-1.5856223345,-3.0071780928,2.5042067608\H,0,1.063988616  
3,-4.0032454087,1.283972798\H,0,-0.0641210063,-5.0025424227,2.23038654  
98\H,0,0.8172743921,-3.6550695133,2.9888401513\Version=ES64L-G09RevE.  
01\State=1-A\HF=-267.7284526\RMSD=3.860e-09\Dipole=-0.4766584,0.288232

1,-0.1618144\Quadrupole=-6.534893,-8.468315,15.003208,3.9636542,-7.071  
3931,8.6961445\PG=C01 [X(C14H17C11F3N2O3)]\@

### Propanoate.M062X\_6-31pGd\_opt\_water

1\1\GINC-R3734\FOpt\RM062X\Gen\C3H5O2(1-)\ROOT\20-Feb-2019\0\# M062X/  
Gen 6D SCF=Tight INT(grid=ultrafine) OPT IOP(2/17=4) SCRF=(SMD,Solvent  
=h2o) maxdisk=671088640\Prop.M062X\_6-31pGd\_opt\_water\1,1\C,-5.36193  
1422,-2.1851750805,-0.0010493259\C,-3.9901278265,-1.5269845556,-0.0062  
098952\C,-2.8018701603,-2.4897299901,-0.0036948422\O,-3.0165693554,-3.  
7345453186,0.0023159164\O,-1.6480639674,-1.9630117113,-0.0079128531\H,  
-6.1512583288,-1.4264304065,-0.0032632774\H,-5.4980804609,-2.810996842  
0,8865442624\H,-5.5008675187,-2.8190580647,-0.8824691686\H,-3.8719243  
684,-0.8719220321,0.8655163482\H,-3.8746810839,-0.8798954932,-0.884238  
03\Version=ES64L-G09RevE.01\State=1-A\HF=-267.8436842\RMSD=2.039e-09  
\RMSF=3.576e-05\Dipole=-2.8998729,1.5078719,-0.0023025\Quadrupole=-5.0  
406627,-0.9670921,6.0077547,-0.722816,0.0207007,0.0329233\PG=CS [SG(C3  
H1O2),X(H4)]\@

### Propanoate.M062X\_6-31pGd\_opt

1\1\GINC-R3722\FOpt\RM062X\Gen\C3H5O2(1-)\ROOT\20-Feb-2019\0\# M062X/  
Gen 6D SCF=Tight INT(grid=ultrafine) OPT IOP(2/17=4) maxdisk=671088640  
\Prop.M062X\_6-31pGd\_opt\1,1\C,-5.3604901217,-2.1792620695,-0.001078  
5416\C,-3.9877001921,-1.5147220948,-0.0062695987\C,-2.7836446279,-2.50  
9262949,-0.0036345436\O,-3.0683394909,-3.7307125802,0.0023800142\O,-1.  
6543796102,-1.96203547,-0.0079073515\H,-6.1740803926,-1.4393181008,-0.  
0031685936\H,-5.4705963512,-2.8209238535,0.8789185652\H,-5.473359375-  
2.8289245607,-0.8748398729\H,-3.8700120765,-0.8573002989,0.8659698109\H  
-3.8727704402,-0.8652785273,-0.8848307535\Version=ES64L-G09RevE.01\  
State=1-A\HF=-267.7291889\RMSD=5.199e-09\RMSF=8.412e-05\Dipole=-2.026  
0163,0.9674059,-0.0012164\Quadrupole=-5.1945784,-0.8343147,6.028893,-0  
.1834739,0.0185188,0.0315648\PG=CS [SG(C3H1O2),X(H4)]\@

### Propanoate.M062X\_6-31pGd\_opt\_Pentadecane

1\1\GINC-R3737\FOpt\RM062X\Gen\C3H5O2(1-)\ROOT\20-Feb-2019\0\# M062X/  
Gen 6D SCF=Tight INT(grid=ultrafine) OPT IOP(2/17=4) SCRF=(SMD,Solvent  
=n-Pentadecane) maxdisk=671088640\Prop.M062X\_6-31pGd\_opt\_Pentadecane\  
1,1\C,-5.3600696907,-2.180285733,-0.0010745393\C,-3.9873658129,-1.51  
94156931,-0.0062487373\C,-2.7854190224,-2.5053647538,-0.0036495146\O,-  
3.0537622797,-3.7308157195,0.002357518\O,-1.652508465,-1.9617200656,-0  
0079117368\H,-6.1676977658,-1.4359271617,-0.0031941015\H,-5.479990106  
2,-2.8178245846,0.8807936761\H,-5.4827590363,-2.825833375,-0.876713625  
4\H,-3.8715227808,-0.8612944382,0.8654756016\H,-3.8742795225,-0.869267  
9751,-0.8842954062\Version=ES64L-G09RevE.01\State=1-A\HF=-267.777229  
8\RMSD=3.585e-09\RMSF=6.233e-05\Dipole=-2.2407592,1.0781309,-0.0013827  
\Quadrupole=-5.0485579,-0.8880239,5.9365818,-0.3320726,0.0188204,0.031  
623\PG=CS [SG(C3H1O2),X(H4)]\@

### 3\_propanoate.M062X\_6-31pGd\_bsse

1\1\GINC-R3713\SP\RM062X\Gen\C13H18N3O5(1-)\ROOT\22-Feb-2019\0\# M062  
X\Gen 6D SCF=Tight INT(grid=ultrafine) Counterpoise=2 maxdisk=67108864  
0\3Nitro\_EtO.M062X\_6-31pGd\_bsse\1,1\C,0,11.8422003791,-0.0093140006  
-7.406870633\C,0,10.866875673,-0.2318581274,-6.253193625\C,0,10.48961  
59427,1.0798747015,-5.5720591867\N,0,9.5200365692,0.8350186116,-4.5296  
969509\C,0,9.2943101649,1.7621778254,-3.5657444561\O,0,9.9438561715,2.  
8043935511,-3.4554937513\N,0,8.2612192768,1.4017353285,-2.7120670116\C  
0,7.7880355122,2.1113103946,-1.6285846348\C,0,8.3061095686,3.34239839  
82,-1.1871598669\C,0,6.7052929987,1.5390966883,-0.9242337145\C,0,6.157  
3847307,2.1729664624,0.1819231382\C,0,6.6564138272,3.3935457161,0.6343  
305718\C,0,7.7213752671,3.9360589324,-0.0743008182\H,0,12.1197804264,-  
0.9548649909,-7.8843047081\H,0,12.7625793791,0.4739804664,-7.057614449  
2\H,0,11.3071846469,-0.9021764164,-5.5050485334\H,0,9.9560552247,-0.72  
2056827,-6.6105623226\H,0,10.0940713387,1.7866319967,-6.320537311\H,  
0,11.3714738271,1.5556864862,-5.1279192856\H,0,8.8748597608,0.03416122  
78,-4.6465636567\H,0,9.1341421411,3.8087168447,-1.7022744142\H,0,6.313  
6035437,0.5871695606,-1.2763731265\H,0,5.3250312091,1.7077709394,0.702  
4495606\N,0,8.2663634102,5.2261437734,0.3867433337\H,0,6.2472087104,3.  
9083488466,1.4938473978\O,0,9.2040663202,5.7105989572,-0.22163442\O,0,  
7.7473769434,5.750323776,1.3639245924\H,0,11.4008771952,0.636251285-  
8.1753604744\H,0,7.7653037491,0.5044412784,-2.9017459185\O,0,6.7768482  
391,-0.91642851,-3.0355757571\O,0,7.827446644,-1.3935625599,-4.9625682  
393\C,0,6.9752745343,-1.6158633805,-4.0681978032\C,0,6.0746158144,-2.8  
526776643,-4.220596633\C,0,6.3410901161,-3.6716931353,-5.4774035516\H,  
0,5.0360703091,-2.5002365146,-4.1914253422\H,0,6.2075942576,-3.4606871

87,-3.3171035449H,0.6.1991567076,-3.0600853105,-6.3731270158H,0.5.67  
28574534,-4.539762253,-5.5356934326H,0.7.3761520165,-4.0250581587,-5.  
4947975836\\Version=ES64L-G09RevE.01\\State=I-A\\HF=-267.7285017RMSD=3.  
820e-09\\Dipole=-0.3526007,-0.9378964,-0.2803204\\Quadrupole=16.0157337,  
-18.4232951,2.4075614,-9.4981782,-1.1398482,-24.0434363\\PG=C01 [X(C13H  
18N3O5)]\\@

### 3\_propanoate.M062X\_6-31pGd\_opt\_Pentadecane

\\GINC-R4093\FOpt\RM062X\Gen\C13H18N3O5(1-)\ROOT\20-Feb-2019\0\# M0  
62X\Gen 6D SCF=Tight INT(grid=ultrafine) OPT IOP(2/17=4) SCRF=(SMD,Sol  
vent=n-Pentadecane) maxdisk=2684354560\3Nitro\_EtO.M062X\_6-31pGd\_opt\_P  
entadecane\\-1,C,11.8330546196,0.009951039,-7.4246012445C,10.795597  
6122,-0.2033075385,-6.3260364409C,10.5282093921,1.0808693166,-5.54884  
10786N,9.5189767107,0.8493391314,-4.5372385245C,9.2847983034,1.77000  
16299,-3.5726333506O,9.9367072468,2.8121376999,-3.456225334N,8.24469  
91693,1.4150415621,-2.7271164605C,7.7736354545,2.1218871544,-1.637607  
1726C,8.303049777,3.4222411,-1.1847814802C,6.6841189917,1.556399727  
2,-0.9396251314C,6.1391618468,2.1862726709,0.170176643C,6.650417706  
3.3978735605,0.633033858C,7.7227444563,9.339794949,-0.068327709H,  
12.028196473,-0.9177976125,-7.9724531252H,12.7850829968,0.3587428521,  
-7.0070154814H,11.1363233975,-0.9762989782,-5.6262913997H,9.85525777  
14,-0.5687550188,-6.7562155651H,10.2110939913,1.877038712,-6.24033889  
06H,11.4474820788,1.4320913893,-5.0649779328H,8.8919691087,0.0340810  
206,-4.6467258297H,9.1372415325,3.8045330868,-1.6921908855H,6.282457  
8293,0.6110905923,-1.2968552834H,5.3010339409,1.7257207764,0.68492734  
92N,8.2848054363,5.211997583,0.4012347109H,6.2412504589,3.9069074227  
1.496223699O,9.2315252966,5.6867070964,-0.2025001037O,7.7729102338,  
5.738602999,1.3798411959H,11.493138124,0.7598652381,-8.148589898H,7  
.7463943189,0.5201386582,-2.9180068181O,6.7493118338,-0.904735458,-3.  
0395136091O,7.8466471974,-1.4083040717,-4.929489464C,6.9698124705,-  
1.6220781347,-4.0566976077C,6.0687044382,-2.8539929452,-4.2183314292  
C,6.3992064168,-3.7253652409,-5.4222667542H,5.0349192846,-2.489378452  
3,-4.2715705882H,6.1340561469,-3.4286878478,-3.2863356996H,6.3192991  
362,-3.1526686158,-6.3509575985H,5.7209417331,-4.5847523263,-5.485646  
0846H,7.4255770672,-4.1000426327,-5.3620179196\\Version=ES64L-G09RevE  
.01\\State=I-A\\HF=-1046.2961265RMSD=9.560e-09RMSF=5.346e-06Dipole=-0  
.4448889,-1.0272953,-0.2897771\\Quadrupole=15.7937069,-19.3359546,3.542  
2477,-9.8968473,-3.0360819,-22.8963032\\PG=C01 [X(C13H18N3O5)]\\@

### 3\_propanoate.M062X\_6-31pGd\_opt

\\GINC-R4045\FOpt\RM062X\Gen\C13H18N3O5(1-)\ROOT\22-Feb-2019\0\# M0  
62X\Gen 6D SCF=Tight INT(grid=ultrafine) OPT IOP(2/17=4) maxdisk=26843  
54560\3Nitro\_EtO.M062X\_6-31pGd\_opt\\-1,C,11.8422003791,-0.009314000  
6,-7.406870633C,10.866875673,-0.2318581274,-6.253193625C,10.48961594  
27,1.0798747015,-5.5720591867N,9.5200365692,0.8350186116,-4.529696950  
9C,9.2943101649,1.7621778254,-3.5657444579O,9.9438561715,2.804393551  
1,-3.4554937513N,8.2612192768,1.4017353285,-2.7120670116C,7.78803551  
22,2.1113103946,-1.6285846348C,8.3061095686,3.3423983982,-1.187159866  
9C,6.7052929987,1.5390966883,-0.9242337145C,6.1573847307,2.172966462  
4,0.1819231382C,6.6564138272,3.3935457161,0.6343305718C,7.7213752671  
3.9360589324,-0.0743008182H,12.1197804264,-0.9548649909,-7.884304708  
1H,12.7625793791,0.4739804664,-7.0576144492H,11.3071846469,-0.902176  
4164,-5.5050485334H,9.9560552247,-0.7272056827,-6.6105623226H,10.094  
0713387,1.7866319967,-6.3205037311H,11.3714738271,1.5556864862,-5.127  
9192856H,8.8748597608,0.0341612278,-4.6465636567H,9.1341421411,3.808  
7168447,-1.7022744142H,6.3136035437,0.5871695606,-1.2763731265H,5.32  
50312091,1.7077709394,0.7024495606N,8.2663634102,5.2261437734,0.38674  
33337H,6.2472087104,3.9083488466,1.4938473978O,9.2040663202,5.710598  
9572,-0.22163442O,7.7473769434,5.750323776,1.3639245924H,11.40087719  
52,0.6362531285,-8.1753604744H,7.7653037491,0.5044412784,-2.901745918  
5O,6.7768482391,-0.91642851,-3.035575751O,7.827446644,-1.3935625599  
-4.9625682393C,6.9752745343,-3.615863805,-6.0781978032C,6.07461581  
44,-2.8526776643,-4.220596633C,6.3410901161,-3.6716931353,-5.47740355  
16H,5.0360703091,-2.5002365146,-4.1914253422H,6.2075942576,-3.460687  
187,-3.3171035449H,6.1991567076,-3.0600853105,-6.3731270158H,5.67285  
74534,-4.539762253,-5.5356934326H,7.3761520165,-4.0250581587,-5.49479  
75836\\Version=ES64L-G09RevE.01\\State=I-A\\HF=-1046.2535069RMSD=5.298e  
-09RMSF=1.829e-06Dipole=-0.3352079,-0.9156316,-0.2789361\\Quadrupole=  
16.0621437,-18.533502,2.4713583,-9.6037577,-1.1544174,-24.1217358\\PG=C  
01 [X(C13H18N3O5)]\\@

### 3.M062X\_6-31pGd\_opt

\\GINC-R3711\FOpt\RM062X\Gen\C10H13N3O3\ROOT\05-Feb-2019\0\# M062X/  
Gen 6D SCF=Tight INT(grid=ultrafine) OPT IOP(2/17=4) maxdisk=214748364  
8\3Nitro.M062X\_6-31pGd\_opt\\0,1C,11.976345989,0.0061280099,-7.425250  
7149C,10.8599533005,-0.2924077031,-6.4272884814C,10.5728612723,0.908  
0702491,-5.5349502823N,9.5095481378,0.5967348862,-4.5866521223C,9.25  
30092586,1.4844080597,-3.5681185861O,9.952752698,2.4537198739,-3.3394  
170983N,8.1350171797,1.1430021223,-2.812527081C,7.633335535,1.8305  
06074,-1.6997216586C,8.0070456154,3.1400457179,-1.3765148363C,6.6863  
913503,1.1702845688,-0.9025678979C,6.1170359542,1.7948255666,0.200292  
6271C,6.4784965145,3.0946293002,0.5419748871C,7.4160242875,3.7239169  
032,-0.2643959348H,12.1769164426,-0.8587165088,-8.0638275071H,12.905  
4839288,0.2637654957,-6.9064944111H,11.1317909462,-1.1477822545,-5.79  
74928625H,9.947339418,-0.5730046714,-6.9716982387H,10.3074211527,1.7  
851039085,-6.1422505364H,11.4592970175,1.177666817,-4.9545682245H,8.  
7290288318,0.0656375877,-4.9536922562H,8.7385016168,3.6814458108,-1.9  
596330923H,6.3946268677,0.1526370683,-1.1522600875H,5.3875463395,1.2  
608258081,0.8005345069N,7.8096120773,5.1086270685,0.075622932H,6.05  
76182961,3.6087303978,1.3966338025O,8.6108307305,5.6654731589,-0.6502  
661505O,7.3020524464,5.6082646417,1.0648925181H,11.7105991917,0.8479  
597051,-8.0736411785H,7.771797585,0.2075823377,-2.9390657686\\Version  
=ES64L-G09RevE.01\\State=I-A\\HF=-778.4465485RMSD=5.446e-09RMSF=3.616e  
-06Dipole=-0.9115699,-3.0607712,-1.4438158\\Quadrupole=-2.5712875,-6.69  
18327,4.1205452,2.2393257,-4.2671613,-3.3203394\\PG=C01 [X(C10H13N3O3)]  
\\@

### 3\_propanoate.M062X\_6-31pGd\_opt\_water

\\GINC-R3876\FOpt\RM062X\Gen\C13H18N3O5(1-)\ROOT\19-Feb-2019\0\# M0  
62X\Gen 6D SCF=Tight INT(grid=ultrafine) OPT IOP(2/17=4) SCRF=(SMD,Sol  
vent=h2o) maxdisk=2684354560\3Nitro\_EtO.M062X\_6-31pGd\_opt\_water\\-1,C,  
11.7946268034,0.0466150654,-7.4270879364C,10.6517761139,-0.1247145  
886,-6.4314475741C,10.6353190445,1.0088510765,-5.4160111499N,9.54021  
1451,0.8297944793,-4.4739927157C,9.323499262,1.7248786773,-3.49083130  
94O,10.0467820684,2.72588007,-3.3263383629N,8.2411480312,1.433824355  
6,-2.6866058391C,7.7730016999,2.1603182038,-1.5952295543C,8.26611779  
43,3.4101675986,-1.2023329412C,6.7194006241,1.5863704815,-0.856530313  
C,6.1733803272,2.2335269136,0.2433730682C,6.6552401005,3.4753998837,  
0.6532634949C,7.6911926458,4.0201709734,-0.0916336234H,11.8075466745  
-0.7694641336,-8.1557118272H,12.7628132218,0.055937794,-6.9141245625  
H,10.7522669337,-1.0816948172,-5.9046121334H,9.6918611035,-0.1497949  
318,-6.9619392784H,10.5270278455,1.9709212975,-5.9326277673H,11.5882  
379222,1.037813212,-4.8732673979H,8.9046473829,0.0319123047,-4.604656  
8984H,9.0657562212,3.8944564422,-1.7406801009H,6.3327474904,0.617767  
7669,-1.1610337003H,5.3634236783,1.7638705712,0.7918644717N,8.220931  
2702,5.3274618043,0.3115939005H,6.244633172,3.9929576464,1.511072031  
4O,9.1472806271,5.8066392087,-0.3262151001O,7.7134496874,5.887974721  
9,1.272964786H,11.696255525,0.9887357563,-7.9778199782H,7.745780255,  
0.547098298,-2.8754752759O,6.8110885669,-1.0051267568,-3.0936284011O  
,7.8630883329,-1.4744661098,-5.0091031026C,7.0024040686,-1.7260653568  
-4.1211193008C,6.1230476594,-2.9655785114,-4.2582003273C,6.37856010  
51,-3.8090202495,-5.4990869406H,5.0819798968,-2.6219996154,-4.2296615  
993H,6.2676151028,-3.5600363012,-3.348014345H,6.2084889142,-3.231203  
3462,-6.4128466358H,5.7086631756,-4.6744625168,-5.5170253055H,7.4085  
90555,-4.1783873676,-5.5218204459\\Version=ES64L-G09RevE.01\\State=I-A  
\\HF=-1046.3291487RMSD=5.952e-09RMSF=4.329e-06Dipole=-1.0506236,-1.2  
74423,0.1161399\\Quadrupole=15.8218801,-22.5551851,6.733305,-10.1054368  
-7.3455213,-22.1841876\\PG=C01 [X(C13H18N3O5)]\\@

### 3.M062X\_6-31pGd\_opt\_water

\\GINC-R3710\FOpt\RM062X\Gen\C10H13N3O3\ROOT\05-Feb-2019\0\# M062X/  
Gen 6D SCF=Tight INT(grid=ultrafine) OPT IOP(2/17=4) SCRF=(SMD,Solvent  
=h2o) maxdisk=2147483648\3Nitro.M062X\_6-31pGd\_opt\_water\\0,1C,11.958  
3662522,-0.0398805739,-7.4267135578C,10.7522815818,-0.2281169012,-6.5  
123191543C,10.665179954,0.8886003743,-5.4829591982N,9.5112063584,0.6  
865335269,-4.6151687795C,9.237628695,1.5397411494,-3.6057799257O,9.8  
92789743,2.576605003,-3.4186311158N,8.1711914219,1.170894275,-2.80966  
48645C,7.6579542565,1.8504793734,-1.7021361925C,7.9662163512,3.17882  
0366,-1.3952138614C,6.7579391537,1.1496515703,-0.8803144671C,6.1806  
442095,1.7532018149,0.229101436C,6.4828829829,3.0723550146,0.56008911  
84C,7.3712003108,3.7405161619,-0.2703208518H,12.0176881047,-0.842921  
909,-8.1672437787H,12.8903647103,-0.0421590674,-6.8508852079H,10.822  
3478404,-1.192277084,-5.9936625521H,9.8299782281,-0.2451620512,-7.10  
55760172H,10.5724272987,1.8578454845,-5.9855736369H,11.5801635397.0

9165315714,-4.8785712962\H,8.9906309808,-0.1799058751,-4.6996858865\H,  
8.6379868926,3.7592609009,-2.0089785181\H,6.5151154162,0.1182575982,-1  
.1229258904\H,5.4909959841,1.1879936407,0.8471252331\N,7.7038298848,5.  
1340095056,0.0465781156\H,6.0489832865,3.5570355363,1.4256926132\O,8.5  
202131906.5.7137359645,-0.6540116658\O,7.1486108854,5.6592067101,1.000  
871033\H,11.8965588424,0.9121190607,-7.9653109286\H,7.7669034439,0.255  
1095229,-2.9800502023\Version=ES64L-G09RevE.01\State=1-A\HF=-778.4707  
003\RMDS=4.352e-09\RMSE=4.333e-06\Dipole=-1.3828861,-5.0146593,-1.5740  
941\Quadrupole=2.0411232,-5.8243226,3.7831994,2.5324333,-5.5294194,-3.  
8730558\PG=C01 [X(C10H13N3O3)]\@

### 3.M062X\_6-31pGd\_opt\_Pentadecane

1\1\GINC-R3879\FOpt\RM062X\Gen\C10H13N3O3\ROOT\22-Feb-2019\0\# M062X/  
Gen 6D SCF=Tight INT(grid=ultrafine) OPT IOP(2/17=4) SCRF=(SMD,Solvent  
=n-Pentadecane) maxdisk=2147483648\3Nitro.M062X\_6-31pGd\_opt\_Pentadeca  
ne\0,1\,1.9732352486,-0.0220521338,-7.4271575308\C,10.8871040704,-0  
.3066766638,-6.3938329815\C,10.5699384465,0.9292137156,-5.5619056109\N  
.5286825356,0.6305041265,-4.587330345\C,9.2542075407,1.5205562078,-  
3.5860828129\O,9.9286195073,2.5181348066,-3.3785464448\N,8.1548004403,  
1.1649889795,-2.8141889642\C,7.6335460166,1.848922254,-1.7121754731\C,  
8.0417097897,3.1341093741,-1.3361911202\C,6.6322285468,1.2039024079,-0  
.9681002634\C,6.0446842,1.819283102,0.129511224\C,6.4383837845,3.09580  
19425,0.5217446068\C,7.4289068369,3.7103717128,-0.2307140116\H,12.1970  
436471,-0.9141853752,-8.0194886974\H,12.9012126001,0.299914532,-6.9421  
886448\H,11.2037838282,-1.1155654689,-5.7243855441\H,9.9754789796,-0.6  
485516888,-6.9032592195\H,10.2637490586,1.7602051771,-6.2128731667\H,1  
1.4558677234,1.2583414761,-5.0119643812\H,8.7984666209,-0.007019048,-4  
.8818898977\H,8.8119541498,3.6621998588,-1.879437318\H,6.3143689032,0  
.2049439562,-1.2579908882\H,5.2735781246,1.2972733603,0.6868040616\N,  
8.607145625,5.0665176613,0.1623026404\H,5.9996630588,3.5977938906,1.37  
47373036\O,8.7177051054,5.6117251316,-0.5089733625\O,7.3308577199,5.56  
71439926,1.1406227092\H,11.6638782919,0.7701545783,-8.1177526375\H,7.7  
539106623,0.250128134,-2.9815301261\Version=ES64L-G09RevE.01\State=1-  
A\HF=-778.4653178\RMDS=8.776e-09\RMSE=1.411e-05\Dipole=-1.1216815,-3.5  
337825,-1.649406\Quadrupole=3.1612106,-6.4324384,3.2712278,2.3648128,-  
4.5930142,-3.417306\PG=C01 [X(C10H13N3O3)]\@

### 5\_propanoate.M062X\_6-31pGd\_opt\_water

1\1\GINC-R3714\FOpt\RM062X\Gen\C13H18N3O5(1-)\ROOT\09-Apr-2019\0\# M0  
62X\Gen 6D SCF=Tight INT(grid=ultrafine) OPT IOP(2/17=4) SCRF=(SMD,Sol  
vent=h2o) maxdisk=2684354560\4Nitro\_EtO\_c3.M062X\_6-31pGd\_opt\_water\1-  
1\C,-3.7351386832,3.9843548265,-1.5202798621\C,-3.952622903,2.696466  
9799,-1.0245574362\C,-2.9604271335,2.0953912817,-0.278796061\C,-1.7408  
593272,2.7607562492,-0.0145752656\C,-1.5462634468,4.0594710165,-0.5291  
512512\C,-2.543187622,4.6637939487,-1.277311711\N,-0.81174500322,2.063  
1925995,0.73878491\C,0.4372799304,2.4790683332,1.158057041\N,1.090612  
0233,1.5559613045,1.894300811\O,0.9005945849,3.602406767,0.9019492867  
C,2.4869569993,1.7455178429,2.2591757926\C,3.4556817927,1.4666315232,1  
.1124287828\C,4.901616228,1.6958323013,1.5413115572\H,-3.1129035524,1.  
094799476,0.114515573\H,-0.623823213,4.5889047394,-0.3451382483\H,-1.1  
034606464,1.1129743164,1.0284767003\H,0.7231884346,0.5963045295,1.9495  
431998\H,2.6931508403,1.0693050767,3.0943809553\H,2.6194685207,2.76836  
03057,2.625373019\H,3.2041144778,2.1163643272,0.2654284935\H,3.3193590  
874,0.4307796144,0.7782237991\H,5.055740011,2.7339190829,1.8570649596\  
H,5.596539885,1.4866564513,0.7222897861\H,5.1678200842,1.0460952122,2.  
3829036086\H,-4.8842006199,2.1785656633,-1.2213227909\H,-2.3928534682,  
5.6618669253,-1.6731421592\N,-4.7665169924,4.6239788542,-2.3002719736\  
O,-4.5675954415,5.7576176772,-2.7283257552\O,-5.8111204828,4.013812616  
2,-2.511196442\O,-1.6777977766,-0.5516623728,1.4879055769\C,-0.8761812  
522,-1.4308085984,1.9162035806\O,0.3457838169,-2.109446121,2.17209235  
1\C,-1.3834490139,-2.8511266385,2.146285821\C,-2.8640720874,-3.0648823  
201,1.8670531044\H,-1.1412300119,-3.1122652791,3.1833033252\H,-0.77108  
92878,-3.5112384534,1.5199253445\H,-3.4835610307,-2.4276700991,2.50583  
5233\H,-3.1416941702,-4.1063182803,2.0580005491\H,-3.1083885214,-2.835  
6531882,0.8252315922\Version=ES64L-G09RevE.01\State=1-A\HF=-1046.3333  
889\RMDS=9.153e-09\RMSE=8.902e-06\Dipole=-0.9082268,-0.4847987,0.108102  
1\Quadrupole=-3.3612231,-3.3961292,6.7573523,17.0409585,-19.2556513,17  
.9396419\PG=C01 [X(C13H18N3O5)]\@

### 5.M062X\_opt

1\1\GINC-R4420\FOpt\RM062X\Gen\C10H13N3O3\ROOT\16-Jul-2018\0\# M062X/  
Gen 6D SCF=Tight INT(grid=ultrafine) OPT IOP(2/17=4) Freq=Noraman maxd  
isk=2147483648\aryl\_urea\_nitro.M062X\_opt\0,1\C,-4.128982565,3.513988  
4707,-1.183629988\C,-4.1394367067,2.1380556781,-0.980631752\C,-3.03562  
00123,1.5473000123,-0.3915244311\C,-1.9239638653,3.2167845953,-0.00403  
83317\C,-1.9358355191,3.7051896614,-0.2166303245\C,-3.0439732604,4.296  
7312443,-0.8091844109\N,-0.8494364913,1.6312121575,0.564181443\C,0.30  
8824824,2.1728409354,1.1171399472\N,1.1888002006,1.2206407743,1.569444  
1465\O,0.5144614668,3.3685438184,1.2209619949\C,2.4936961304,1.6435313  
258,0.9040119455,3.2800831193\H,-3.0294983004,0.4724187398,-0.228228290  
2\H,-1.0897004552,4.3048941219,0.0866659614\H,-0.9915740742,0.63770443  
47,0.6915892694\H,1.1445721653,0.2963064929,1.1582438455\H,2.326574727  
2,2.4641925997,2.7666049834\H,3.1082105742,2.0417376927,1.2439385006\H  
.3258784696,-0.3454201641,-2.0402325705\H,2.5771055313,0.1158543846,3  
.5696552029\H,5.2198538338,1.2570295116,2.4686710726\H,5.0801740532,0.  
0683053998,3.7714896634\H,4.4795597748,1.7152069562,4.0094514898\H,-5.  
0003564541,1.5529591911,-1.2818353504\H,-3.0719931253,5.3664414182,-0.  
9817447106\N,-5.2917156323,4.1494177591,-1.8063943022\O,-5.2575694001,  
5.3567293852,-1.9739154499\O,-6.2275656631,3.4325567062,-2.122136861\N  
\Version=ES64L-G09RevE.01\State=1-A\HF=-778.4499459\RMDS=6.870e-09\RMSE  
F=4.894e-06\Dipole=-2.2256844,-2.5208187,1.018129\Quadrupole=-6.8461647  
.7,6056811,-0.7595163,2.5829747,-6.6148256,1.6003784\PG=C01 [X(C10H13N  
3O3)]\@

### 5\_propanoate.M062X\_6-31pGd\_opt

1\1\GINC-R3723\FOpt\RM062X\Gen\C13H18N3O5(1-)\ROOT\08-Apr-2019\0\# M0  
62X\Gen 6D SCF=Tight INT(grid=ultrafine) OPT=CalcFC IOP(2/17=4) maxdis  
k=2684354560\4Nitro\_EtO\_c3.M062X\_6-31pGd\_opt\1-1\C,-3.7513263626,3.  
9287002984,-1.4505395418\C,-3.9455572747,2.6243727976,-0.9846289191\C,  
-2.936927777,2.0014055091,-0.2802025115\C,-1.7096688283,2.6659517193,-  
0.024422138\C,-1.535695504,3.9850310636,-0.5052467599\C,-2.553939553,  
4.6028171751,-1.2117753213\N,-0.7720089716,1.9608725535,0.6831292376\C  
.5025559611,2.3834607537,1.0573525174\N,1.1827517827,1.436268654,1.7  
431219496\O,0.9586568773,3.4999641801,0.7991663616\C,2.531028656,1.696  
0751786,2.1907891791\C,3.5776208211,1.5305754301,1.0868344849\C,4.9865  
738083,1.8272058884,1.5959812679\H,-3.0605239941,0.987906215,0.0934343  
262\H,-0.6039465985,4.4975466848,-0.3123095345\H,-1.0586934705,0.99557  
56732,0.9643172981\H,0.7778337816,0.4951882362,1.9102444592\H,2.740122  
0338,0.9995352132,3.0110440818\H,2.5834930226,2.717231094,2.5885710843  
\H,3.1180971829,2.2087510005,0.2662506309\H,3.5188100697,0.5068521472,  
0.6977189723\H,5.0576846237,2.8563362428,1.9673730322\H,5.7355517073,1  
.7044446308,0.8065343199\H,5.2569166191,1.156387375,2.4207390873\H,-4.  
8840950827,2.1191367085,-1.1815309314\H,-2.4308307514,5.6134303474,-1.  
5843936687\N,-4.8063636602,4.5870895478,-2.1895779655\O,-4.6149556496,  
5.7315272307,-2.5882817866\O,-5.8500156027,3.9735506972,-2.3875348715\  
O,-1.7268088676,-0.5462757561,1.3134470307\C,-0.9655792279,-1.35944505  
96,1.9063291377\O,0.2158334553,-1.1367762144,2.2719443567\C,-1.5213058  
226,-2.7585251525,2.2149996278\C,-2.9643848344,-2.9757780895,1.7770555  
166\H,-1.4069722479,-2.9182392918,3.2942125986\H,-0.850421965,-3.48194  
0197,1.7351049278\H,-3.6285789748,-2.2568840959,2.265498238\H,-3.30515  
12128,-3.9892626873,2.0219187841\H,-3.0677088063,-2.8234837015,0.69888  
11716\Version=ES64L-G09RevE.01\State=1-A\HF=-1046.2609461\RMDS=6.397e  
-09\RMSE=2.208e-06\Dipole=1.1289521,-0.3191933,0.3132944\Quadrupole=-6  
.1728893,-4.3508446,10.5237339,14.5279586,-18.8912194,18.5300414\PG=C0  
1 [X(C13H18N3O5)]\@

### 5.M062X.SMD.h2o\_opt

1\1\GINC-R3710\FOpt\RM062X\Gen\C10H13N3O3\ROOT\16-Jul-2018\0\# M062X/  
Gen 6D SCF=Tight INT(grid=ultrafine) OPT IOP(2/17=4) Freq=Noraman SCRF  
=(SMD,Solvent=h2o) maxdisk=2147483648\aryl\_urea\_nitro.M062X.SMD.h2o.o  
pt\0,1\C,-4.125916005,3.4998430573,-1.206437773\C,-4.128777902,2.1259  
278664,-0.9605600196\C,-3.0246350367,1.5584023043,-0.3576118826\C,-1.9  
119464806,2.3456821077,0.0059553437\C,-1.9313341496,3.7288291274,-0.25  
5360463\C,-3.0400976655,4.2997898532,-0.8608799511\N,-0.8512055527,1.6  
766772167,0.5976971031\C,0.3193607839,2.2062546602,1.119767672\N,1.173  
9391185,1.2886176225,1.613403176\O,0.5597848137,3.4207456825,1.1436391  
442\C,2.4679646225,1.6830276002,2.1574539036\C,3.2188585319,0.46395184  
21,3.6707726964\C,4.5824900658,0.8559491883,3.230461217\H,-3.010563251  
9,0.4907358273,-0.1583851458\H,-1.0886115892,4.349875342,0.00839646\H,  
-0.9664323857,0.6704535873,0.6781382897\H,0.9718771744,0.2991123058,1.  
5175175017\H,2.3107984151,2.4001941662,2.9706984173\H,3.0542511821,2.18

86527433,1.3804177611\H,3.3428834259,-0.2554520755,1.8519236849\H,2.62  
09760398,-0.0281878136,3.447377251\H,5.2007183719,1.3287852149,2.45946  
7659\H,5.1200131976,-0.0210156903,3.6029294341\H,4.4763612625,1.564290  
3173,4.059463401\H,-4.9808383039,1.5153116349,-1.2357679338\H,-3.0564  
117285,5.3641711626,-1.0648929006\N,-5.2783902402,4.1058908085,-1.8367  
558933\O,-5.2670118799,5.3139073691,-2.0490752659\O,-6.2277905702,3.38  
95269707,-2.1373528872\Version=ES64L-G09RevE.01\State=1-AHF=-778.474  
2615\RMSD=9.912e-09\RMSE=9.398e-06\Dipole=2.8426373,-0.4099692,1.68655  
44\Quadrupole=-11.9526653,11.6593844,0.2932808,2.84577,-9.5921794,0.48  
90728\PG=C01 [X(C10H13N3O3)]\@

### 5\_propanoate.M062X\_6-31pGd\_opt\_Pentadecane

1\1\GINC-R3711\FOpt\RM062X\Gen\C13H18N3O5(1-)\ROOT\09-Apr-2019\0\# M0  
62X\Gen 6D SCF=Tight INT(grid=ultrafine) OPT IOP(2/17=4) SCRF=(SMD,Sol  
vent=n-Pentadecane) maxdisk=2684354560\4Nitro\_EtO\_c3.M062X\_6-31pGd\_opt  
\_Pentadecane\1,1\,C,-3.7754690421,3.929272446,-1.4479382126,C,-3.95  
88053733,2.6240019118,-0.9812727949,C,-2.9438338958,2.0121398969,-0.27  
63035684,C,-1.7229984506,2.6869946707,-0.0215264154,C,-1.5617407644,4.  
0065180011,-0.503086808\,C,-2.5849605006,4.6152917546,-1.2104691045\N,-  
0.777909037,1.9894032278,0.6867074353\,C,0.4965768113,2.4153111318,1.05  
44576313\N,1.1808652332,1.474144496,1.7423936195\O,0.9482747953,3.5319  
002094,0.7869693707\,C,2.5351382559,1.7244745502,2.1859180632\,C,3.58250  
57216,1.4879709924,1.0966059725\,C,4.9961777596,1.7548837981,1.60604846  
95\H,-3.0616756844,0.9978138377,0.0961339656\H,-0.6359403841,4.5302897  
383,-0.3130740521\H,-1.0565897459,1.0228153717,0.9679905929\H,0.773912  
2691,0.537371505,1.917516041\H,2.7260725891,1.0599125921,3.0362575498\H,  
2.6052710393,2.7585736722,2.5430807284\H,3.3545850013,2.1439687766,0.  
2486293095\H,3.4930978892,0.4538207367,0.7418876994\H,5.1018184048,2.  
7926921032,1.943896383\H,5.7437698849,1.5812235903,0.8249030749\H,5.24  
09121428,1.1021271769,2.4528381402\H,-4.8909511027,2.106000407,-1.1757  
948482\H,-2.4665622067,5.626806215,-1.5823592155\N,-4.8363327464,4.577  
2146911,-2.1875488101\O,-4.6558148372,5.7225220325,-2.5878915787\O,-5.  
8747334344,3.955086474,-2.3850789601\O,-1.7022507337,-0.5296809659,1.3  
191478454\,C,-0.9511725814,-1.342797,1.9255507864\O,0.2235478663,-1.109  
9844459,2.3098304815\,C,-1.5063940024,-2.7406189072,2.22765851\,C,-2.925  
4257614,-2.9823165415,1.7313748169\H,-1.4407725092,-2.884070965,3.3133  
521048\H,-0.809086851,-3.4651639148,1.7891344506\H,3.6235102529,-2.27  
14955993,2.1834235382\H,-3.2603934045,-3.9976291313,1.9751928833\H,-2.  
9871823615,-2.8502133347,0.6469949048\Version=ES64L-G09RevE.01\State=  
1-AHF=-1046.302573\RMSD=4.715e-09\RMSE=2.074e-06\Dipole=1.1417111,-0.  
3652287,0.2807062\Quadrupole=-5.2490388,-3.9388533,9.1878921,14.957380  
7,-18.6858002,18.056195\PG=C01 [X(C13H18N3O5)]\@

### 5.M062X.SMD.pentadecane.opt

1\1\GINC-R3717\FOpt\RM062X\Gen\C10H13N3O3\ROOT\25-Feb-2019\0\# M062X\  
Gen 6D SCF=Tight INT(grid=ultrafine) OPT=CalcFC IOP(2/17=4) SCRF=(SMD,  
Solvent=n-Pentadecane) maxdisk=2147483648\aryl\_urea\_nitro.M062X\_6-31p  
Gd\_opt\_Pentadecane\0,1\,C,-1.5445993,3.6247819097,-1.0853892591\,C,-4.  
2572485059,2.320112074,-0.6099078225\,C,-3.1583054192,1.7491559756,0.00  
4822759\,C,-1.9559582724,2.4676076469,1.504614651\,C,-1.8758527939,3.78  
445036,-0.3350423832\,C,-2.9794159439,4.3560329683,-0.9532087861\N,-0.9  
005977541,1.8043094513,0.7686633261\,C,0.3578115569,2.3058970684,1.0913  
448135\N,1.1794119564,1.3763560428,1.6624581202\O,0.6877993509,3.46780  
2739,0.9091510278\,C,2.5640853314,1.7102058017,1.9691307369\,C,3.1700182  
37,0.6624847188,2.8940999195\,C,4.6238995858,0.9841045311,3.2274809992\  
H,-3.2246141799,0.7310783691,0.380210396\H,-0.960446306,4.3472565124,-  
0.2225234152\H,-1.1087687601,0.8632374015,1.0801119538\H,0.9626469457,  
0.3939959538,1.5425153374\H,2.5694392334,2.693291802,2.4476897215\H,3.  
1549212034,1.7937348566,1.0461135692\H,3.11275557\N,-0.3252310863,2.41  
6322066\H,2.5729519866,0.6104342451,3.8124770761\H,5.2393461437,1.0171  
527261,2.3217437607\H,5.0508567619,0.2296808746,3.894814377\H,4.706598  
0469,1.9567086817,3.7246560699\H,-5.184041143,1.7699708816,-0.7231630  
009\H,-2.9297946531,5.3702987525,-1.332376085\N,-5.3090564018,4.236044  
5226,-1.7365396053\O,-5.1967574501,5.3799199441,-2.1487984625\O,-6.328  
884413,3.5701842752,-1.835848675\Version=ES64L-G09RevE.01\State=1-AH  
F=-778.4688472\RMSD=3.881e-09\RMSE=3.369e-06\Dipole=2.2744712,-2.88254  
94,1.5805109\Quadrupole=-8.923933,8.6816601,0.2422729,2.9466523,-7.180  
1777,0.2545\PG=C01 [X(C10H13N3O3)]\@

### 5\_propanoate.M062X\_6-31pGd\_bsse

1\1\GINC-R51\SP\RM062X\Gen\C13H18N3O5(1-)\ROOT\09-Apr-2019\0\# M062X\  
Gen 6D SCF=Tight INT(grid=ultrafine) Counterpoise=2 maxdisk=671088640\  
4Nitro\_EtO\_c3.M062X\_6-31pGd\_bsse\1,1\,C,-3.7513263626,3.9287002984  
-1.4505395418\,C,0,-3.9455572747,2.6243727976,-0.9846289191\,C,0,-2.936  
927777,2.0014055091,-0.2802025115\,C,0,-1.7096688283,2.6659517193,-0.02  
4422138\,C,0,-1.535695504,3.9850310636,-0.5052467599\,C,0,-2.5539939553,  
4.6028171751,-1.2117753213\N,0,-0.7720089716,1.9608725535,0.6831292376  
\,C,0,0.5025559611,2.3834607537,1.0573525174\N,0,1.1827517827,1.4362686  
54,1.7431219496\O,0,0.9586568773,3.4999641801,0.7991663616\,C,0,2.53102  
8656,1.6960751786,2.1907891791\,C,0,3.5776208211,1.5305754301,1.0868344  
849\,C,0,4.9865738083,1.8272058884,1.5959812679\H,0,-3.0605239941,0.987  
906215,0.0934343262\H,0,-0.6039465985,4.4975466848,-0.3123095345\H,0,-  
1.0586934705,0.9955756732,0.9643172981\H,0,0.7778337816,0.4951882362,1.  
9102444592\H,0,2.7401220338,0.9995352132,3.0110440818\H,0,2.583493022  
6,2.717231094,2.5885710843\H,0,3.3180971829,2.2087510005,0.2662506309\  
H,0,3.5188100697,0.5068521472,0.6977189723\H,0,5.0576846237,2.85633624  
28,1.9673730322\H,0,5.7355517073,1.7044446308,0.8065343199\H,0,5.25691  
66191,1.156387375,2.4207390873\H,0,-4.8840950827,2.1191367085,-1.18153  
09134\H,0,-2.4308307514,5.6134303474,-1.5843936687\N,0,-4.8063636602,4.  
5870895478,-2.1895779655\O,0,-4.6149556496,5.7315272307,-2.5882817866  
O,0,-5.8500105627,3.9735506972,-2.3875348715\O,0,-1.7268088676,-0.546  
2757561,1.3134473007\,C,0,-0.9655792279,-1.3594450596,1.9063291377\O,0,  
0.2158334553,-1.367762144,2.2719443567\,C,0,-1.5213058226,-2.758525152  
5,2.2149996278\,C,0,-2.9643848344,-2.9757780895,1.7770555166\H,0,-1.406  
9722479,-2.9182392918,3.2942125986\H,0,-0.850421965,-3.481940197,1.735  
1049278\H,0,-3.6285789748,-2.2568840959,2.265498238\H,0,-3.3051512128,  
-3.9892626873,2.0219187841\H,0,-3.0677088063,-2.8234837015,0.698881171  
6\Version=ES64L-G09RevE.01\State=1-AHF=-267.7284552\RMSD=4.083e-09\I  
pole=1.1203743,-0.3445599,0.3193793\Quadrupole=-6.2426389,-4.2072351,  
10.449874,14.5445351,-18.8761834,18.4243407\PG=C01 [X(C13H18N3O5)]\@

### 7\_propanoate.M062X\_6-31pGd\_opt

1\1\GINC-R3713\FOpt\RM062X\Gen\C13H17N3O5(1-)\ROOT\19-Feb-2019\0\#  
M062X\Gen 6D SCF=Tight INT(grid=ultrafine) OPT IOP(2/17=4) maxdisk=268  
4354560\2Nitro4Fluro\_OS\_EtO.M062X\_6-31pGd\_opt\1,1\,C,-1.1297360717,2.  
3964663439,1.119823652\,C,0.0220389649,2.2519398472,0.1277236605\,C,1.3  
723773182,2.5076111547,0.7889029145\N,2.4371352014,2.2922401897,-0.165  
5555889\,C,3.6849726872,2.7430983417,0.0983367986\O,3.9816855367,3.4666  
310099,1.0454266173\N,4.6275253398,2.2757149579,-0.827584821\,C,5.9724  
798625,2.515543343,-0.7162276324\,C,6.5624079888,3.7237072727,-0.288632  
9181\,C,6.8501682752,1.4609049261,-1.052090821\,C,8.2076047841,1.629582  
6765,-0.9046695791\,C,8.7904937954,2.7954342952,-0.4144263475\,C,7.93945  
79256,3.8451155029,-0.1087361243\H,-2.0975897422,2.224915508,0.6371843  
423\H,-1.1468735781,3.4005539422,1.5603711866\H,-0.10045457,2.95667940  
22,-0.7035913154\H,0.0245044916,1.2474366228,-0.3128865024\H,1.4890789  
871,1.8470734548,1.6641000921\H,1.4389750588,3.5368961175,1.1579551905  
H,2.3096726042,1.5330629141,-0.8588104976\H,6.4339869116,0.5186707578  
-1.4000974964\,F,0.0247718742,0.6010078017,-1.2269002991\N,5.800724308  
7,4.967410592,-0.1566095338\H,9.8658208157,2.8681825393,-0.3013975589\  
O,6.1767234063,5.7746313394,0.681001651\O,4.8987091014,5.166357629,-0  
9474404129\H,-1.0331709942,1.6762377865,1.9407523237\H,4.3909752855,1.  
3844463705,-1.320675041\H,8.3261834916,4.7920899598,0.2506022672\O,4  
2550600381,-0.1632620162,-2.0456000495\O,2.0288813997,0.0819811224,-1  
876616107\,C,3.0632086793,-0.5342100038,-2.2347328328\,C,2.8422663648,-  
1.8641804944,-2.9733029244\,C,4.1233174845,-2.5808007956,-3.3819876591\  
H,2.2173696447,-1.6438725652,-3.8476722675\H,2.227904792,-2.495642009  
-2.3201589564\H,4.7276270009,-1.9470350564,-0.0373168526\H,3.90338233  
87,-3.5187366042,-3.9067291366\H,4.7361975098,-2.8073017264,-2.5046977  
594\Version=ES64L-G09RevE.01\State=1-AHF=-1145.4562657\RMSD=5.523e-0  
9\RMSE=7.067e-06\Dipole=0.653526,-0.4650718,0.1381915\Quadrupole=3.992  
4685,-10.2778694,6.2854009,-1.8914837,-1.9498735,-12.092034\PG=C01 [X  
C13H17N3O5)]\@

### 7.M062X\_6-31pGd\_opt\_water

1\1\GINC-R3710\FOpt\RM062X\Gen\C10H12F1N3O3\ROOT\04-Feb-2019\0\# M062  
X\Gen 6D SCF=Tight INT(grid=ultrafine) OPT IOP(2/17=4) SCRF=(SMD,Solve  
nt=h2o) maxdisk=2147483648\2Nitro4Fluro.M062X\_6-31pGd\_opt\_water\0,1\  
C,-1.0125306187,2.0137799716,0.4981301908\,C,0.2883085143,1.5904330624,  
-0.1761984722\,C,1.4720450154,2.3592671422,0.3899427657\N,2.7064605185,  
1.9467995501,-0.2684328883\,C,3.8908800932,2.4781745051,0.082719351\O,  
4.0030068211,3.3507302217,0.9516121919\N,4.9767417829,1.9392966714,-0.  
6074013019\,C,6.2919326308,2.3478020477,-0.516269283\,C,7.3809896947,1.5  
023087074,-0.8593377436\,C,6.6159073498,3.6492842771,-0.0945225818\,C,7.

9365242334,0.0345700765,-0.0261704793\C,9.0112985207,3.2146015975,-0.3561888216\C,8.7101110433,1.9373123361,-0.7777311948\H,-1.8634146095,1.4605264493,0.0900180407\H,-1.2013657893,3.0824629355,0.3482287602\H,0.2260604467,1.7678729534,-1.2568328218\H,0.4538579866,0.5157357782,-0.0327294416\H,1.560508879,2.1793367972,1.4676325626\H,1.3277503484,3.4363028519,0.2457206468\H,2.6585426065,1.2459060521,-1.0007246647\H,5.8394383038,4.3570915007,0.1587305259\F,8.1973697765,5.2930073839,0.3696174246\N,7.1922880824,0.1403816708,-1.3056271005\H,0.0304803066,3.5769192168,-0.2918303895\O,8.1619395458,-0.6056476948,-1.3423685523\O,6.0688515175,-0.2352975144,-1.6413168232\H,-0.9735596895,1.8259329859,1.5767222469\H,4.8109539025,1.08320985,-1.1265749631\H,9.5018827865,1.2542686167,-1.060057184\Version=ES64L-G09RevE.01\State=1-A\HF=-877.6784303\RMSD=3.571e-09\RMSF=6.704e-06\Dipole=-1.1593172,-0.1071962,-0.9661862\Quadrupole=18.9485783,-14.3365663,-4.612012,9.4325059,3.1287428,-6.740761\PG=C01 [X(C10H12F1N3O3)]\@

### 7\_propanoate.M062X\_6-31pGd\_opt\_Pentadecane

1\1\GINC-R3729\FOpt\RM062X\Gen\C13H17F1N3O5(1-)\ROOT\19-Feb-2019\0\# M062X\Gen 6D SCF=Tight INT(grid=ultrafine) OPT IOP(2/17=4) SCRF=(SMD,Solvent=n-Pentadecane) maxdisk=2684354560\2Nitro4Fluro\_OS\_EtO.M062X\_6-31pGd\_opt\_Pentadecane\1,1\C,-1.1278809855,2.4182071301,1.1592007895\C,0.0377063152,2.1176467908,0.2214931872\C,1.3668642623,2.5705085742,0.8136278506\N,2.4500516808,2.2535789359,-0.0945725752\C,3.6971202695,2.7074098094,0.1474672733\O,3.9933509195,3.4694426857,1.0673513719\N,4.6419401766,2.2051769714,-0.7543176375\C,5.9859375211,2.4732290897,-0.6688868445\C,6.5562122439,3.7142733862,-0.3191484676\C,6.8809044736,1.4192920523,-0.9476188029\C,8.23649125,1.6249470876,-0.8267344755\C,8.8016815386,2.8285508625,-0.4164426252\C,7.9324374508,3.877050815,-0.1632952152\H,-2.0800144752,2.0958087408,0.7251574965\H,-1.2009421952,3.4922573195,1.3668753351\H,-0.1103077283,2.6199769021,-0.7422693815\H,0.0854547059,1.0428893863,0.0084495468\H,1.5272339463,2.0880836115,1.7899435152\H,1.3571051867,3.6521542347,0.9935836022\H,2.302668564,1.5273494423,-0.817326328\H,6.4860855073,0.448141494,-1.2335103528\F,9.0674307691,0.592677213,-1.0955131966\N,5.7647359655,4.942741414,-0.2440667775\H,9.8764423127,2.9309559982,-0.3217699005\O,6.1151367771,5.7968868328,0.5567861422\O,4.8582495588,5.0853090106,-1.0437484743\H,-1.0062078263,1.9014553324,2.1184397006\H,4.4122079068,1.2964382312,-1.2186537186\H,8.3077263473,4.8505640092,0.132113475\O,4.2753400691,-0.2474351695,-1.946905502\O,2.0720888387,0.1697364594,-1.9785202\C,3.0859797819,-0.5105149324,-2.279300328\C,2.83965765,-1.7642076787,-1.294225598\C,4.0853211786,-2.5854510466,-3.4331675094\H,2.357432554,-1.4297974542,-4.0566331934\H,2.0889569344,-2.3675915002,-2.6044258568\H,4.8265340612,-1.9860128013,-3.9698158436\H,3.839000208,-3.4607376501,-4.0463281421\H,4.5591162853,-2.9348935898,-2.5107090679\Version=ES64L-G09RevE.01\State=1-A\HF=-1145.4991168\RMSD=3.164e-09\RMSF=2.434e-06\Dipole=-0.7350205,-0.5221865,0.1673755\Quadrupole=6.9520892,-11.5215369,4.5694478,-0.390856,-3.1057428,-11.1801063\PG=C01 [X(C13H17F1N3O5)]\@

### 7.M062X\_6-31pGd\_opt\_Pentadecane

1\1\GINC-R3720\FOpt\RM062X\Gen\C10H12F1N3O3\ROOT\24-Feb-2019\0\# M062X\Gen 6D SCF=Tight INT(grid=ultrafine) OPT IOP(2/17=4) SCRF=(SMD,Solve nt=n-Pentadecane) maxdisk=2147483648\2Nitro4Fluro.M062X\_6-31pGd\_opt\_Pentadecane\0,1\C,-1.0576715397,2.5476750865,1.1585684792\C,0.1794826507,1.9099230201,0.5331505778\C,1.4191099795,2.7671436394,0.7512900498\N,2.5841393789,2.1412651614,0.1355399483\C,3.8246689411,2.6526805017,0.3664750035\O,4.0636983771,3.5516060554,1.1534365781\N,4.8313314207,0.160571226,-0.378221566\C,6.1664660255,2.4036670988,-0.3078257641\C,6.5967935849,3.7410447026,-0.3409287792\C,7.1504699665,1.4149316737,-0.1928385622\C,8.4815699519,1.7788951932,-0.1091336944\C,8.9101129166,3.0982280315,-0.0972818211\C,7.9395798369,4.0828019744,-0.2081008241\H,-1.9441658237,1.9265190577,0.9999481378\H,-1.2561926924,3.5331171838,0.7232147891\H,0.0167311022,1.7717374532,-0.5448802968\H,0.3516284009,0.9154020951,0.9624535832\H,1.6260746214,2.8778599591,1.8195256171\H,1.267075794,3.7751759025,0.3421994408\H,2.4355037001,1.6751591796,-0.7523992115\H,6.8765858823,0.3659640939,-0.1381837729\F,9.3980004171,0.800071853,-0.0070769371\N,5.6736956247,4.8474668813,-0.6119689009\H,9.964440874,3.3343227453,-0.012294067\O,5.9154031699,5.9209787256,-0.0918740345\O,4.7583706332,4.6460332449,-1.3915648196\H,-0.9285632537,2.6784869087,2.238557452\H,4.6731119323,1.041082149,-0.6053458361\H,8.2123481271,5.1321047009,-0.2176890626\Version=ES64L-G09RevE.01\State=1-A\HF=-877.6701264\RMSD=7.307e-09\RMSF=4.072e-06\Dipole=-0.4926326,-2.1810089,0.5745452\Quadrupole=11.7837334,-5.8217086,-5.9620249,8.0073373,-0.108409,1.6816334\PG=C01 [X(C10H12F1N3O3)]\@

### 7\_propanoate.M062X\_6-31pGd\_opt\_water

1\1\GINC-R3744\FOpt\RM062X\Gen\C13H17F1N3O5(1-)\ROOT\19-Feb-2019\0\# M062X\Gen 6D SCF=Tight INT(grid=ultrafine) OPT IOP(2/17=4) SCRF=(SMD,Solvent=h2o) maxdisk=2684354560\2Nitro4Fluro\_OS\_EtO.M062X\_6-31pGd\_opt\_water\1,1\C,-1.0535728957,2.269192852,1.1138158709\C,0.1426459507,1.9177682156,0.2352973397\C,1.4156088431,2.5721999753,0.7520136738\N,2.5384419747,2.2358897761,-0.1120306198\C,3.7806513875,2.6540754373,0.1672380084\O,4.0577311567,3.4013275146,1.1217595748\N,4.7512276383,2.1658365345,-0.7025903991\C,6.0965267833,2.4771720236,-0.590507543\C,6.6061567269,3.7586533072,-0.3052993362\C,0.7340771384,1.4497717185,-0.7706997481\C,8.3800303912,1.7276989092,-0.6436020332\C,8.8831223233,2.9801483575,-0.3118625848\C,7.9663152749,4.0029180927,-0.136355638\H,-1.9668790344,1.7948984612,0.7425434032\H,-1.219891122,3.3519828532,1.1336695293\H,-0.0386749418,2.2454628301,-0.7959548382\H,0.2823185354,0.8299766842,0.2066843693\H,1.6239247662,2.2353807799,1.7750374517\H,1.2912771707,3.6614115261,0.785739063\H,2.381512223,1.6286447061,-0.9284229257\H,6.7018596831,0.4380028899,-0.9815886491\F,9.2521905661,0.7144415671,-0.8270043925\N,5.7360821102,4.9276151368,-0.2645784958\H,9.9503601732,3.1409445453,-0.2122076116\O,5.9979591136,5.8098551465,0.5403338009\O,4.8146833695,4.9997877457,-1.0638271723\H,-0.8942327712,1.9338187283,2.1446610368\H,4.5323622575,1.2654266615,-1.1683383528\H,8.299199311,5.0087597485,0.0953808999\O,4.1385157735,-0.3202511227,-1.9036968666\O,2.1213004859,0.5136688148,-2.3857677284\C,3.0059240648,-0.3908918033,-2.4631492272\C,2.656048838,-1.6289594917,-3.282389358\C,3.7571963506,-2.6744979794,-3.3826073551\H,2.3595092456,-1.2790114669,-4.278332454\H,1.7521004629,-2.0591589691,-2.8342045789\H,4.65545817,-2.2605102015,-3.851220618\H,3.4223198218,-3.5239678625,-3.9862236273\H,4.0368626834,-3.0519326418,-2.3942358566\Version=ES64L-G09RevE.01\State=1-A\HF=-1145.5374082\RMSD=6.936e-09\RMSF=5.673e-06\Dipole=-1.5658626,-0.9675569,0.2315619\Quadrupole=14.2827095,-12.4275073,-1.8552022,4.3868576,-6.1358712,-9.5105758\PG=C01 [X(C13H17F1N3O5)]\@

### 7.M062X\_6-31pGd\_opt

1\1\GINC-R3812\FOpt\RM062X\Gen\C10H12F1N3O3\ROOT\04-Feb-2019\0\# M062X\Gen 6D SCF=Tight INT(grid=ultrafine) OPT IOP(2/17=4) maxdisk=2147483648\2Nitro4FluroNside.M062X\_6-31pGd\_opt\0,1\C,-1.0352678055,2.036279399,0.4335330475\C,0.318954075,1.4442677246,0.049933106\C,1.4302717083,2.4809518289,0.1538324012\N,2.7106141557,1.8952699927,-0.2171995475\C,3.8708598619,2.5614737557,0.0526486769\O,3.9042813274,3.6007264633,0.6892938521\N,4.9972788279,1.9068629247,-0.4557861809\C,6.312317588,2.3181790852,-0.3910800272\C,7.3644533904,1.5406724905,-0.9512319958\C,6.6777887645,3.530571848,0.2249560082\C,8.0036734159,3.9049305708,0.258934644\C,9.0412181228,3.1515251359,-0.2846028517\C,8.6978265154,1.9618286222,-0.8908801088\H,-1.8284371654,1.2876699411,0.3567820672\H,-1.2988014596,2.8735236115,-0.2213985301\H,0.272340478,1.0574717064,-0.9773977919\H,0.5601221078,0.5956410796,0.7011145145\H,1.5200381887,2.8494200718,1.1797210141\H,1.2068977087,3.3486737469,-0.4825534905\H,2.7067649081,1.162758537,-0.9153294545\H,5.9240694621,4.1623674563,0.6726779975\F,8.3107997157,5.0652093172,0.8537883752\N,7.1400764495,0.2665364015,-1.6220770058\H,10.0656374367,3.4983385991,-0.2247386039\O,8.0990278665,-0.3207647954,-2.0843715113\O,5.9917389557,-0.1756668701,-1.700913617\H,-1.0219289235,2.4076542079,1.4635753727\H,4.8668511064,1.00356562741,-0.8977444736\H,9.4537932168,1.3264318737,-1.3347258921\Version=ES64L-G09RevE.01\State=1-A\HF=-877.6632646\RMSD=8.727e-09\RMSF=2.068e-06\Dipole=-0.8554689,-0.1352166,-0.1707841\Quadrupole=14.6916499,-10.8073033,-3.8843466,5.7497949,2.2093733,-0.6460769\PG=C01 [X(C10H12F1N3O3)]\@

### 7\_propanoate.M062X\_6-31pGd\_bsse

1\1\GINC-R3747\SP\RM062X\Gen\C13H17F1N3O5(1-)\ROOT\21-Feb-2019\0\# M062X\Gen 6D SCF=Tight INT(grid=ultrafine) Counterpoise=2 maxdisk=671088640\2Nitro4Fluro\_OS\_EtO.M062X\_6-31pGd\_bsse\1,1\C,0,-1.1297360717,2.3964663439,1.119823652\C,0.0220389649,2.2519398472,0.1277236605\C,0.13723773182,2.5076111547,0.7889029145\N,0,2.4371352014,2.2922401897,-0.165555889\C,0,3.6849726872,2.7430983417,0.0983367986\O,0,3.9816855367,3.4666031099,1.0454266173\N,0,4.6275253398,2.2757149579,-0.8272584821\C,0,5.9724798625,2.515543343,-0.7162276324\C,0,6.5624079888,3.7237027227,-0.2886329181\C,0,6.8501682752,1.4609049261,-1.0520908211\C,0,8.2076047841,1.6295826765,-0.9046695791\C,0,8.7904937954,2.7954342952,-0.4144263475\C,0,7.9394579256,3.8451155029,-0.1087361243\H,0,-2.0975897422,2.224915508,0.6371843423\H,0,-1.1468735781,3.4005539422,1.5603711866\H,0,-0.10045457,2.9566794022,-0.7035913154\H,0,0.0245044916,1.24743

66228,-0.3128865024H,0,1.4890789871,1.8470734548,1.6641000921H,0,1.4  
389750588,3.5368961175,1.1579551905H,0,2.3096726042,1.5330629141,-0.8  
588104976H,0,6.4339869116,0.5186707578,-1.4000974964F,0,9.0247718742  
0.6010078017,-1.2269002991N,0,5.8007243087,4.967410592,-0.1566095338  
H,0,9.8658208157,2.8681825393,-0.3013975589O,0,6.1767234063,5.774631  
3394,0.681001651V,O,0,4.8987091014,5.166357629,-0.9474404129H,0,-1.03  
31709942,1.6762377865,1.9407523237H,0,4.3909752855,1.3844463705,-1.32  
06750411H,0,8.3261834916,4.7920899598,0.256022672O,0,4.2550600381,-  
0.1632620162,-2.0456000495O,0,2.0288813997,0.0819811224,-1.876616107  
C,0,3.0632086793,-0.5342100038,-2.2347328328C,0,2.8422663648,-1.86418  
04944,-2.9733029244C,0,4.1233174845,-2.5808007956,-3.3819876591H,0,2  
2173696447,-1.6438725652,-3.8476722675H,0,2.2272904792,-2.495642009,  
-2.3201589564H,0,4.7276270009,-1.9470350564,-4.0373168526H,0,3.90338  
23387,-3.5187366042,-3.9067291366H,0,4.7361975098,-2.8073017264,-2.50  
46977594\\Version=ES64L-G09RevE.01\\State=-1\\AHF=-267.7284743\\RMSD=4.10  
5e-09\\Dipole=0.6522519,-0.4939089,0.1235596\\Quadrupole=3.9437066,-10.1  
848382,6.2411316,-1.8009603,-1.9030818,-11.972177\\PG=C01 [X(C11H17F1N3  
O5)]\\@

### 13.M062X\_6-31pGd\_opt\_water

I\\GINC-R4385\\FOpt\\RM062X\\GenC11H12F3N3O3\\ROOT30-Oct-2018\\# M062  
X\\Gen 6D SCF=Tight INT(grid=ultrafine) OPT IOP(2/17=4) SCRF=(SMD,Solve  
nt=h2o) maxdisk=2684354560\\3TMF4Nitro.M062X\_6-31pGd\_opt\_water\\0,1\\C,  
-1.9658583651,1.7695463288,-0.0806185923C,-0.5748401399,1.1463961009,  
-0.0305590128C,0.5063299695,2.216108136,-0.0490110062N,1.8263642127,  
1.5984374705,-0.0000821539C,2.9454696501,2.3446251474,-0.0058065997O  
,2.9248691756,3.5811891951,-0.0534855861N,4.124626415,1.6091318544,0.  
0466079608C,5.4266422861,2.0726650522,0.0544016583C,5.7725297188,3.4  
370215379,-0.0002268114C,6.4509666772,1.1159961964,0.1197849502C,7.7  
722455996,1.5126936927,0.1305456401C,8.1086522995,2.8643317224,0.0767  
05958C,7.0990477618,3.843902737,0.0101327904H,-2.7407901678,0.997521  
9055,-0.0674054174H,-2.0964904253,2.3635387404,-0.9918183894H,-2.131  
0648006,2.4285530951,0.7787918005H,-0.4328059774,0.4754882938,-0.8866  
41676H,-0.4671247412,0.5406127915,0.8775174936H,0.3889532993,2.88838  
78603,0.8087869112H,0.4237131695,2.8226806228,-0.9582852559H,1.88682  
29705,0.5864361641,0.0399825723H,4.0270808005,0.5981791982,0.08690422  
95H,4.9872875817,4.1737619263,-0.051189859H,6.2045612467,0.059321554  
1,0.1623503465C,7.329136288,5.3463141309,-0.0539291145F,6.1608984364  
6.0127638745,-0.1111521995F,8.0137372387,5.7235553182,-1.145443386F  
,9.644922531,5.8239192891,1.0280049278N,9.5287044493,3.1772535021,0.  
093865538O,10.3272100878,2.249811702,0.1525131333O,9.8747021929,4.34  
76421223,0.0493661491H,8.5596508371,0.7710427371,0.1814030004\\Versio  
n=ES64L-G09RevE.01\\State=-1\\AHF=-115.4153608\\RMSD=7.192e-09\\RMSF=2.13  
1e-05\\Dipole=-4.1935416,-4.7697022,0.1108934\\Quadrupole=-12.3248682,11  
5.609379,0.7639304,6.9454957,-0.5307636,-0.3262755\\PG=C01 [X(C11H12F3N  
3O3)]\\@

### 13.M062X\_6-31pGd\_opt\_Pentadecane

I\\GINC-R3884\\FOpt\\RM062X\\GenC11H12F3N3O3\\ROOT22-Feb-2019\\# M062  
X\\Gen 6D SCF=Tight INT(grid=ultrafine) OPT IOP(2/17=4) SCRF=(SMD,Solve  
nt=n-Pentadecane) maxdisk=2684354560\\3TMF4Nitro.M062X\_6-31pGd\_opt\_Pen  
tadecane\\0,1\\C,-1.9776202957,1.8025031131,-0.0902413331C,-0.59628399  
75,1.1770732272,0.0804641007C,0.5096733242,2.1871804746,-0.1943910193  
N,1.8174743754,1.5645733385,-0.0308023587C,2.9428021468,2.3306752562  
,0.0037466875O,2.9194036241,3.5519794142,0.0059301471N,4.1230667502,  
1.5884517518,0.0632940743C,5.4280725587,2.0641138822,0.0726966238C,5  
.7571775316,3.4314243869,0.0645937364C,6.4609050716,1.1155917155,0.10  
75382134C,7.7845264951,1.5164537338,0.1091293083C,8.0975911542,2.869  
0113039,0.0580562699C,7.0863286701,3.8360600248,0.0471380313H,-2.767  
300252,1.0723755889,0.1096355042H,-2.1179075543,2.1775396555,-1.10991  
72785H,-2.1157780654,2.6429926083,0.5984535757H,-0.4922080708,0.3248  
591225,-0.6050363617H,-0.4805950593,0.7879852613,1.0993752209H,0.447  
4409518,3.0244578528,0.5064957016H,0.4075773392,2.6009486145,-1.20697  
17068H,1.8918274198,0.577955157,-0.2469341351H,4.0304002233,0.581366  
0363,0.1264764381H,4.9678232697,4.1686211059,0.0861363496H,6.2241552  
612,0.0552940067,0.1284377876C,7.3552720749,5.3297298827,0.0947552479  
F,6.2605445203,5.9972393958,0.4988900063F,7.6878165344,5.8372453438,  
-1.0981652605F,8.3283812406,5.6340452721,0.9674506296N,9.5195993838,  
3.209815263,-0.0253700944O,10.3081659488,2.4624502486,0.5309160954O,  
9.8310142228,4.1915999457,-0.6734378532H,8.5863732026,0.7872180161,0.  
1336676519\\Version=ES64L-G09RevE.01\\State=-1\\AHF=-115.4098895\\RMSD=9  
.956e-09\\RMSF=4.284e-06\\Dipole=-3.3528451,-3.5115204,-0.1106912\\Quadru  
pole=-7.5140199,8.8459824,-1.3319625,4.1844033,1.3057368,2.0295117\\PG=

C01 [X(C11H12F3N3O3)]\\@

### 13\_propanoate.M062X\_6-31pGd\_bsse

I\\GINC-R3741\\SP\\RM062X\\GenC14H17F3N3O5(1-)-ROOT21-Feb-2019\\# M0  
62X\\Gen 6D SCF=Tight INT(grid=ultrafine) Counterpoise=2 maxdisk=671088  
640\\3TMF4Nitro\_EtO.M062X\_6-31pGd\_bsse\\-1,1\\C,0,-2.1722391602,2.33648  
54292,0.0288168634C,0,-0.8072702157,1.6558326114,-0.0380522485C,0,0.  
3288473265,2.6703114776,0.0241364934N,0,1.6013033822,1.9862647428,-0.  
0418431479C,0,2.7508738913,2.6905949403,0.0022655287O,0,2.7988579333  
,3.9178098533,0.0974655628N,0,3.8821447947,1.872672689,-0.0716291428\\  
C,0,5.1912545365,2.2612686797,-0.0505714259C,0,5.628347117,3.60588775  
84,0.0191291486C,0,6.1642357428,1.239509341,-0.1226466602C,0,7.50640  
76405,1.5542025436,-0.098785673C,0,7.9284046706,2.8804285157,0.009577  
2806C,0,6.9795446292,3.9174455414,0.057203102H,0,-2.9851196651,1.604  
4966154,-0.0159193457H,0,-2.304940831,3.0364722735,-0.8046108831H,0  
,-2.2838795461,2.9053335352,0.9594718642H,0,-0.715377429,1.069821114  
8,-0.960100357H,0,-0.6945927909,0.9399238662,0.7846429553H,0,0.26693  
54063,3.2578300181,0.9513886557H,0,0.2456411586,3.3888735979,-0.80394  
36705H,0,1.6061389996,0.9508743887,-0.123368046H,0,3.7286645924,0.83  
91002873,-0.1433673094H,0,4.8848776664,4.3897802354,0.0281236317H,0,  
5.8308519051,0.2069389434,-0.1905046146C,0,7.3365214364,5.3922129271,  
0.070874928F,0,6.2659346773,6.1513458064,-0.2345721331F,0,8.27475150  
4.5.6980526388,-0.8430817347F,0,7.7626601259,5.825526885,1.266573998  
3N,0,9.3618195749,3.1030020141,0.1127336989O,0,10.1080472359,2.23612  
44652,-0.3279026509O,0,9.7535587102,4.122340404,0.6579032828H,0,8.25  
83740229,0.775244043,-0.1467498728O,1,4.918451706,-0.8029655917,-0.  
2573317722O,0,3.7356564194,-0.8609038907,-0.2595479306C,0,2.59567443  
83,-1.4019775371,-0.2983899165C,0,2.5373001381,-2.932958525,-0.405853  
6117C,0,3.8984417199,-3.6159985994,-0.4514571662H,0,1.9469536933,-3.  
1686319092,-1.2999091959H,0,1.9438604769,-3.2910707473,0.4444146069H  
0,4.4805563127,-2.2608513632,-1.3066804669H,0,3.792807737,-4.7049356  
365,-0.5283289059H,0,4.4773361651,-3.3844101868,0.4472462808\\Version  
=ES64L-G09RevE.01\\State=-1\\AHF=-267.7283856\\RMSD=4.138e-09\\Dipole=-0.7  
121311,0.0014285,-0.0400603\\Quadrupole=-23.0707935,-3.853867,26.924660  
5,-19.3131138,-1.6812656,-3.279839\\PG=C01 [X(C14H17F3N3O5)]\\@

### 13.M062X\_6-31pGd\_opt

I\\GINC-R4500\\FOpt\\RM062X\\GenC11H12F3N3O3\\ROOT30-Oct-2018\\# M062  
X\\Gen 6D SCF=Tight INT(grid=ultrafine) OPT IOP(2/17=4) maxdisk=2684354  
560\\3TMF4Nitro.M062X\_6-31pGd\_opt\\0,1\\C,-1.9742617108,1.8081430099,-0  
.0743935693C,-0.5979881938,1.1567532736,0.041399076C,0.5183664618,2.  
173536185,-0.1588726302N,1.8221393759,1.5290110584,-0.0453994365C,2.  
9457757133,2.3094894675,0.0347638849O,2.9092410257,3.5221504368,0.13  
22635068N,4.1308980638,1.5715892349,0.029708471C,5.4356186189,2.0582  
333087,0.0620162185C,5.7519439037,3.4266046246,0.0374284985C,6.47332  
97834,1.1185424186,0.1248147935C,7.7939255906,1.5308174969,0.14043570  
59C,8.0964148976,2.8846153733,0.0748085108C,7.0786995758,3.843215559  
1,0.0340899126H,-2.7711822265,1.0741265791,0.0721825569H,-2.11314200  
46,2.2628061725,-1.0609042435H,-2.098867125,2.594374661,0.6774641467  
H,-0.5069220117,0.3576899585,-0.7076542375H,-0.481067923,0.6877261511  
,1.0255231131H,0.4720571883,2.9534405162,0.6057165612H,0,4.175323368,  
2.6705390481,-1.1337652116H,1.9044140171,0.605826923,-0.4529969127H,  
4.0433024454,0.5673805647,0.1154476273H,4.9562756426,4.1574343408,0.0  
404785465H,6.2447774601,0.0564592484,0.1585816452C,7.331696866,5.342  
5798193,0.0568299258F,6.2160761973,6.0014106888,0.415656203F,7.68969  
67997,5.8224866796,-1.1377286734F,8.2740748502,5.671815069,0.95089076  
84N,9.5222919386,3.2310767065,0.0117549002O,10.3009411288,2.47755959  
01,0.571921867O,9.8349201249,4.2181475989,-0.6238281177H,8.604741189  
6,0.8134308036,0.1933765923\\Version=ES64L-G09RevE.01\\State=-1\\AHF=-11  
15.3915663\\RMSD=2.107e-09\\RMSF=2.631e-06\\Dipole=-2.9671422,-2.9888594,  
-0.2429525\\Quadrupole=-6.3576759,7.3458022,-0.9881263,3.2836212,1.7880  
44,2.1060722\\PG=C01 [X(C11H12F3N3O3)]\\@

### 13\_propanoate.M062X\_6-31pGd\_opt\_water

I\\GINC-R3777\\FOpt\\RM062X\\GenC14H17F3N3O5(1-)-ROOT19-Feb-2019\\# M0  
62X\\Gen 6D SCF=Tight INT(grid=ultrafine) OPT IOP(2/17=4) SCRF=(SMD,S  
olvent=h2o) maxdisk=3221225472\\3TMF4Nitro\_EtO.M062X\_6-31pGd\_opt\_water  
\\-1,1\\C,-2.1497372383,2.3558095669,0.032056354C,-0.7965743427,1.6551  
470486,-0.0359306698C,0.3431651485,2.6628645178,-0.0038610415N,1.627  
3696908,1.9788990849,-0.0729785432C,2.7748068282,2.6767210777,-0.0480  
69852O,2.8100120877,3.917601678,0.0137967615N,3.9156578568,1.8864562  
477,-0.1029935257C,5.2308064083,2.2937973929,-0.0638654412C,5.645845  
7562,3.6411820475,-0.0053871103C,6.2129780764,1.2864790419,-0.1013646

387\C,7.5534537693,1.610447077,-0.054026888\C,7.9486152141,2.943013049  
2.0.0437543881\C,6.9912157753,3.9696689214,0.0555912517H,-2.969319053  
2,1.6314447663,0.0085375802H,-2.2795946632,3.0398239587,-0.8140017464  
H,-2.2421812921,2.9398502347,0.9545018304H,-0.7272177283,1.058650557  
9,-0.9539284361H,-0.6903441463,0.9611097768,0.8068341951H,0.29095219  
11,3.2586974494,0.9160660816H,0.2534149777,3.3583833369,-0.847111791\  
H,1.6365733651,0.9489650259,-0.0688869041H,3.7693720058,0.8631973325,  
-0.1776354732H,4.9046770937,4.4247699292,-0.0240500946H,5.9100931097  
0.2453074957,-0.1579254993\C,7.331537824,5.4471038318,0.0511639485\F,  
6.2716159994,6.1876011756,-0.3190788055\F,8.3124077104,5.7434563505,-0.  
8189925822\F,7.6997127932,5.9079479893,1.2578965535\F,9.370842344,3.1  
94109839,0.175261244O,10.1488671999,2.3644652149,-0.2797795741O,9.73  
4345456,4.206684092,0.7570600473H,8.3060360328,0.8302267385,-0.06343  
73628O,1.4561824748,-0.8985211766,-0.0241019346O,3.6658276366,-0.924  
952448,-0.3561204744\C,2.5493901004,-1.5054859195,-0.227489709C,2.486  
007491,-3.0271315799,-0.3177781091C,3.8158058383,-3.720422424,-0.5776  
864844H,1.7616464779,-3.2687172054,-1.1048567827H,2.0398143437,-3.38  
20858851,0.6190795491H,4.2564437932,-3.3901303527,-1.5234644541H,3.6  
764702217,-4.8048218722,-0.630101281H,4.5350657335,-3.5102829837,0.21  
9945424\Version=ES64L-G09RevE.01\State=I-A\HF=-1383.2755413\RMSD=7.99  
4e-09\RMSF=2.715e-06\Dipole=-0.5132885,-0.3203964,-0.1192825\Quadrupol  
e=-21.6140632,-2.679299,24.2933622,-23.1018033,-1.3205378,-2.9452925P  
G=C01 [X(C14H17F3N3O5)]\@

0.7917815771H,1.5990357283,0.9538783967,-0.0707954237H,3.7254361681,  
0.8371024573,-0.0947074984H,4.8836703954,4.392403716,-0.002028442H,5  
831025561,0.2043371221,-0.1239632361C,7.338267472,5.3888436988,0.009  
1285335\F,6.280115585,6.1407237533,-0.3505504359\F,8.3022372504,5.6590  
100018,-0.889394194\F,7.73714198,5.8632893667,1.1991647714H,9.3546778  
018,3.1097976332,0.1191673528O,10.1060952589,2.2593769899,-0.34195201  
26O,9.740073785,4.1196893517,0.6871741645H,8.2521008715,0.7676354818  
,-0.0916429255O,1.5098798941,-0.8183707638,-0.1918939554O,3.75028535  
85,-0.8663281045,-0.2089754351C,2.6143620902,-1.4155898191,-0.2605035  
756C,2.5594136741,-2.9395989968,-0.4231007054C,3.9169579016,-3.62540  
42013,-0.4968298109H,1.9691071912,-3.1428798276,-1.3251991197H,1.967  
6141381,-3.3304508431,0.4137683977H,4.5017856331,-3.2456412715,-1.340  
0065882H,3.8025725354,-4.7092157113,-0.6175004951H,4.4991491848,-3.4  
405793191,0.4109726574\Version=ES64L-G09RevE.01\State=I-A\HF=-1383.24  
69825\RMSD=5.975e-09\RMSF=8.058e-06\Dipole=-0.7603179,-0.0759196,-0.09  
18397\Quadrupole=-21.5255623,-4.0495999,25.5751621,-20.0714138,-1.3041  
877,-2.8363153\PG=C01 [X(C14H17F3N3O5)]\@

### 13\_propanoate.M062X\_6-31pGd\_opt

1\1\GINC-R4165\FOpt\RM062X\Gen\C14H17F3N3O5(1-)ROOT\19-Feb-2019\0\#\#  
M062X\Gen 6D SCF=Tight INT(grid=ultrafine) OPT IOP(2/17=4) maxdisk=322  
1225472\3TMF4Nitro\_EtO.M062X\_6-31pGd\_opt\1,1\C,-2.1722391602,2.3364  
854292,0.0288168634C,-0.8072702157,1.6558326114,-0.0380522485C,0.328  
8473265,2.6703114776,0.0241364934N,1.6013033822,1.9862647428,-0.04184  
31479C,2.7508738913,2.6905949403,0.0022655287O,2.7988579333,3.917809  
8533,0.0974655628N,3.8821447947,1.872672689,-0.0716291428C,5.1912545  
365,2.2612686797,-0.0505714259C,5.628347117,3.6058877584,0.0191291486  
C,6.1642357428,1.239509341,-0.1226466602C,7.5064076405,1.5542025436,  
-0.098785673C,7.9284046706,2.8804285157,0.0095772806C,6.9795446292,3  
.9174455414,0.057203102H,-2.9851196651,1.6044966154,-0.0159193457H,-  
2.3049408311,3.0364722735,-0.8046108831H,-2.2838795461,2.9053335352,0  
.9594718642H,-0.7153377429,1.0698211148,-0.960100357H,-0.6945927909,  
0.9399238662,0.7846429553H,0.2669354063,3.2578300181,0.9513886557H,0  
2456411586,3.3888735979,-0.8039436705H,1.6061389996,0.9508743887,-0.  
123368046H,3.7286645924,0.8391002873,-0.1433673094H,4.8848776664,4.3  
897802354,0.0281236317H,5.8308519051,0.2069389434,-0.1905046146C,7.3  
365214364,5.3922129271,0.070874928F,6.2659346773,6.1513458064,-0.2345  
721331F,8.274751504,5.6980526388,-0.8430817347F,7.7626601259,5.82555  
26885,1.2665739983N,9.3618195749,3.1030020141,0.1127336989O,10.10804  
72359,2.2361244652,-0.3279026509O,9.7535587102,4.122340404,0.65790328  
28H,8.2583740229,0.7752440434,-0.1467498728O,1.4918541706,-0.8029655  
917,-0.2573317722O,3.7356564194,-0.8609038907,-0.2595479306C,2.59567  
44383,-1.4019775371,-0.2983899165C,2.5373001381,-2.932958525,-0.40585  
36117C,3.8984417199,-3.6159985994,-0.4514571662H,1.9469536933,-3.168  
6319092,-1.2999091959H,1.9438604769,-3.2910707473,0.4444146069H,4.48  
05563127,-3.2608513632,-1.3066804669H,3.792807737,-4.7049356365,-0.52  
83289059H,4.4773361651,-3.3844101868,0.4472462808\Version=ES64L-G09R  
eV.E.01\State=I-A\HF=-1383.207903\RMSD=5.516e-09\RMSF=3.717e-06\Dipole=  
-0.7117307,0.030075,-0.0379697\Quadrupole=-23.0082046,-4.0509797,27.05  
91843,-19.4503144,-1.6907912,-3.3042036\PG=C01 [X(C14H17F3N3O5)]\@

### 13\_propanoate.M062X\_6-31pGd\_opt\_Pentadecane

1\1\GINC-R4197\FOpt\RM062X\Gen\C14H17F3N3O5(1-)ROOT\19-Feb-2019\0\#\#  
M062X\Gen 6D SCF=Tight INT(grid=ultrafine) OPT IOP(2/17=4) SCRF=(SMD,S  
olvent=n-Pentadecane) maxdisk=3221225472\3TMF4Nitro\_EtO.M062X\_6-31pGd  
\_opt\_Pentadecane\1,1\C,-2.1825420614,2.3525563062,0.0189703177C,-0.  
8209839876,1.6653241011,-0.0265687125C,0.3181487691,2.6754301606,0.04  
20352114N,1.5936649197,1.9891684308,-0.0076758382C,2.7457533183,2.68  
846435,0.0228015021O,2.7977146021,3.9183089119,0.0968328744N,3.87623  
32281,1.871353562,-0.0381011114C,5.1876481964,2.2610797961,-0.0279687  
77C,5.6244700807,3.6062611295,0.0082911805C,6.1605475034,1.238982457  
9,-0.0788722845C,7.5037502775,1.5513751198,-0.0631835808C,7.92332915  
86,2.8794427197,0.0156477044C,6.97588342188,3.9168770475,0.038385433H  
,-2.9965227278,1.622028601,-0.0301419657H,-2.3042118591,3.0456006012,  
-0.8218727644H,-2.3049557192,2.9277467129,0.9443313811H,-0.723191641  
3,1.0753426925,-0.9457566036H,-0.7242462005,0.9571576723,0.8051064436  
H,0.2460843235,3.265760689,0.9660091432H,0.2445301421,3.3870398269,-
